# Supplementary material
Source: publisher figshare collection journal article supplement (https://acs.figshare.com/ndownloader/files/24155708)
Supplement: Supplementary file 1 [file 24155708]

## Sheet: Nuisance Filters (P Walter)
rule_id	description	smarts	rule_set_name
1	R1 Reactive alkyl halides	[Br,Cl,I][CX4;CH,CH2]	Glaxo
2	R2 Acid halides	[S,C](=[O,S])[F,Br,Cl,I]	Glaxo
3	R3 Carbazides	O=CN=[N+]=[N-]	Glaxo
4	R4 Sulphate esters	COS(=O)O[C,c]	Glaxo
5	R5 Sulphonates	COS(=O)(=O)[C,c]	Glaxo
6	R6 Acid anhydrides	C(=O)OC(=O)	Glaxo
7	R7 Peroxides	OO	Glaxo
8	R8 Pentafluorophenyl esters	C(=O)Oc1c(F)c(F)c(F)c(F)c1(F)	Glaxo
9	R9 Paranitrophenyl esters	C(=O)Oc1ccc(N(=O)~[OX1])cc1	Glaxo
10	R10 esters of HOBT	C(=O)Onnn	Glaxo
11	R11 Isocyanates & Isothiocyanates	N=C=[S,O]	Glaxo
12	R12 Triflates	OS(=O)(=O)C(F)(F)F	Glaxo
13	R13 lawesson's reagent and derivatives	P(=S)(S)S	Glaxo
14	R14 phosphoramides	NP(=O)(N)N	Glaxo
15	R15 Aromatic azides	cN=[N+]=[N-]	Glaxo
16	R16 beta carbonyl quaternary Nitrogen	C(=O)C[N+,n+]	Glaxo
17	R17 acylhydrazide	[N;R0][N;R0]C(=O)	Glaxo
18	R18 Quaternary C, Cl, I, P or S	[C+,Cl+,I+,P+,S+]	Glaxo
19	R19 Phosphoranes	C=P	Glaxo
20	R20 Chloramidines	[Cl]C([C&R0])=N	Glaxo
21	R21 Nitroso	[N&D2](=O)	Glaxo
22	R22 P/S Halides	[P,S][Cl,Br,F,I]	Glaxo
23	R23 Carbodiimide	N=C=N	Glaxo
24	R24 Isonitrile	[N+]#[C-]	Glaxo
25	R25 Triacyloximes	C(=O)N(C(=O))OC(=O)	Glaxo
26	R26 Cyanohydrins	N#CC[OH]	Glaxo
27	R27 Acyl cyanides	N#CC(=O)	Glaxo
28	R28 Sulfonyl cyanides	S(=O)(=O)C#N	Glaxo
29	R29 Cyanophosphonates	P(OCC)(OCC)(=O)C#N	Glaxo
30	R30 Azocyanamides	[N;R0]=[N;R0]C#N	Glaxo
31	R31 Azoalkanals	[N;R0]=[N;R0]CC=O	Glaxo
32	I1 Aliphatic methylene chains 7 or more long	[CD2;R0][CD2;R0][CD2;R0][CD2;R0][CD2;R0][CD2;R0][CD2;R0]	Glaxo
33	I2 Compounds with 4 or more acidic groups	[C,S,P](=O)[OH].[C,S,P](=O)[OH].[C,S,P](=O)[OH].[C,S,P](=O)[OH]	Glaxo
34	I3 Crown ethers	[O;R1][C;R1][C;R1][O;R1][C;R1][C;R1][O;R1]	Glaxo
35	I4 Disulphides	SS	Glaxo
36	I5 Thiols	[SH]	Glaxo
37	I6 Epoxides, Thioepoxides, Aziridines	C1[O,S,N]C1	Glaxo
38	I7 2,4,5 trihydroxyphenyl	c([OH])c([OH])c([OH])	Glaxo
39	I8 2,3,4 trihydroxyphenyl	c([OH])c([OH])cc([OH])	Glaxo
40	I9 Hydrazothiourea	N=NC(=S)N	Glaxo
41	I10 Thiocyanate	SC#N	Glaxo
42	I11 Benzylic quaternary Nitrogen	cC[N+]	Glaxo
43	I12 Thioesters	C[O,S;R0][C;R0](=S)	Glaxo
44	I13 Cyanamides	N[CH2]C#N	Glaxo
45	I14 Four membered lactones	C1(=O)OCC1	Glaxo
46	I15 Di and Triphosphates	P(=O)([OH])OP(=O)[OH]	Glaxo
47	I16 Betalactams	N1CCC1=O	Glaxo
48	N1 Quinones	O=C1[#6]~[#6]C(=O)[#6]~[#6]1	Glaxo
49	N2 Polyenes	C=CC=CC=CC=C	Glaxo
50	N3 Saponin derivatives	O1CCCCC1OC2CCC3CCCCC3C2	Glaxo
51	N4 Cytochalasin derivatives	O=C1NCC2CCCCC21	Glaxo
52	N5 Cycloheximide derivatives	O=C1CCCC(N1)=O	Glaxo
53	N6 Monensin derivatives	O1CCCCC1C2CCCO2	Glaxo
54	N7 Cyanidin derivatives	[OH]c1cc([OH])cc2=[O+]C(=C([OH])Cc21)c3cc([OH])c([OH])cc3	Glaxo
55	N8 Squalestatin derivatives	C12OCCC(O1)CC2	Glaxo
341	ene_six_het_A(483)	[#6]-1(-[#6](~[!#6&!#1]~[#6]-[!#6&!#1]-[#6]-1=[!#6&!#1])~[!#6&!#1])=[#6;!R]	PAINS
342	hzone_phenol_A(479)	c:1:c:c(:c(:c:c:1)-[#6]=[#7]-[#7])-[O;H1]	PAINS
343	anil_di_alk_A(478)	[C;H2]N([C;H2])c1cc([$([H]),$([C;H2]),$([O][C;H2][C;H2])])c(N)c([H])c1	PAINS
344	indol_3yl_alk(461)	n:1(c(c(c:2:c:1:c:c:c:c:2-[H])-[C;D4]-[H])-[$([C;H2]),$([C]=,:[!C]),$([C;H1][N]),$([C;H1]([C;H2])[N;H1][C;H2]),$([C;H1]([C;H2])[C;H2][N;H1][C;H2])])-[$([H]),$([C;H2])]	PAINS
345	quinone_A(370)	[!#6&!#1]=[#6]-1-[#6]=,:[#6]-[#6](=[!#6&!#1])-[#6]=,:[#6]-1	PAINS
346	azo_A(324)	[#7;!R]=[#7]	PAINS
347	imine_one_A(321)	[#6]-[#6](=[!#6&!#1;!R])-[#6](=[!#6&!#1;!R])-[$([#6]),$([#16](=[#8])=[#8])]	PAINS
348	mannich_A(296)	[#7]-[C;X4]-c1ccccc1-[O;H1]	PAINS
349	anil_di_alk_B(251)	c:1:c:c(:c:c:c:1-[#7](-[#6;X4])-[#6;X4])-[#6]=[#6]	PAINS
350	anil_di_alk_C(246)	c:1:c:c(:c:c:c:1-[#8]-[#6;X4])-[#7](-[#6;X4])-[$([#1]),$([#6;X4])]	PAINS
351	ene_rhod_A(235)	[#7]-1-[#6](=[#16])-[#16]-[#6](=[#6])-[#6]-1=[#8]	PAINS
352	hzone_phenol_B(215)	c:1(:c:c:c(:c:c:1)-[#6]=[#7]-[#7])-[#8]-[#1]	PAINS
353	ene_five_hetA1(201A)	[#6]-1(=[#6])-[#6]=[#7]-[#7,#8,#16]-[#6]-1=[#8]	PAINS
354	ene_five_het_A(201)	[#6]-1(=[#6])-[#6]=[#7]-[!#6&!#1]-[#6]-1=[#8]	PAINS
355	anil_di_alk_D(198)	c:1:c:c(:c:c:c:1-[#7](-[#6;X4])-[#6;X4])-[#6;X4]-[$([#8]-[#1]),$([#6]=[#6]-[#1]),$([#7]-[#6;X4])]	PAINS
356	imine_one_isatin(189)	[#8]=[#6]-2-[#6](=!@[#7]-[#7])-c:1:c:c:c:c:c:1-[#7]-2	PAINS
357	anil_di_alk_E(186)	[#6](-[#1])-[#7](-[#6](-[#1])-[#1])-c:1:c(:c(:c(:c(:c:1-[#1])-[$([#1]),$([#6](-[#1])-[#1])])-[#6](-[#1])-[$([#1]),$([#6]-[#1])])-[#1])-[#1]	PAINS
358	thiaz_ene_A(128)	[#6]-1(=[#6](-[$([#1]),$([#6](-[#1])-[#1]),$([#6]=[#8])])-[#16]-[#6](-[#7]-1-[$([#1]),$([#6]-[#1]),$([#6]:[#6])])=[#7;!R])-[$([#6](-[#1])-[#1]),$([#6]:[#6])]	PAINS
359	pyrrole_A(118)	n2(-[#6]:1:[!#1]:[#6]:[#6]:[#6]:[#6]:1)c(cc(c2-[#6;X4])-[#1])-[#6;X4]	PAINS
360	catechol_A(92)	c:1:c:c(:c(:c:c:1)-[#8;H1])-[#8;H1]	PAINS
361	ene_five_het_B(90)	[#6]-1(=[#6])-[#6](-[#7]=[#6]-[#16]-1)=[#8]	PAINS
362	imine_one_fives(89)	[#6]-1=[!#1]-[!#6&!#1]-[#6](-[#6]-1=[!#6&!#1;!R])=[#8]	PAINS
363	ene_five_het_C(85)	[#6]-1(-[#6](-[#6]=[#6]-[!#6&!#1]-1)=[#6])=[!#6&!#1]	PAINS
364	hzone_pipzn(79)	CN1[C;H2][C;H2]N(N=[C;H1][#6]=,:[#6])[C;H2][C;H2]1	PAINS
365	keto_keto_beta_A(68)	c:1-2:c(:c:c:c:c:1)-[#6](=[#8])-[#6;X4]-[#6]-2=[#8]	PAINS
366	hzone_pyrrol(64)	Cn1cccc1C=NN	PAINS
367	ene_one_ene_A(57)	[#6]=!@[#6](-[!#1])-@[#6](=!@[!#6&!#1])-@[#6](=!@[#6])-[!#1]	PAINS
368	cyano_ene_amine_A(56)	N#CC=C(N)C(C#N)C#N	PAINS
369	ene_five_one_A(55)	c:1-2:c(:c:c:c:c:1)-[#6](=[#8])-[#6](=[#6])-[#6]-2=[#8]	PAINS
370	cyano_pyridone_A(54)	N#Cc1ccc[#7;H1]c1=S	PAINS
371	anil_alk_ene(51)	c:1:c:c-2:c(:c:c:1)-[#6]-3-[#6](-[#6]-[#7]-2)-[#6]-[#6]=[#6]-3	PAINS
372	amino_acridine_A(46)	c:1:c:2:c(:c:c:c:1):n:c:3:c(:c:2-[#7]):c:c:c:c:3	PAINS
373	ene_five_het_D(46)	[#6]-1(=[#6])-[#6](=[#8])-[#7]-[#7]-[#6]-1=[#8]	PAINS
374	thiophene_amino_Aa(45)	[H]N([H])c1sc([!#1])c([!#1])c1C=O	PAINS
375	ene_five_het_E(44)	[#7]-[#6]=!@[#6]-2-[#6](=[#8])-c:1:c:c:c:c:c:1-[!#6&!#1]-2	PAINS
376	sulfonamide_A(43)	NS(=O)(=O)c1cc([F,Cl,Br,I])cc([F,Cl,Br,I])c1O	PAINS
377	thio_ketone(43)	[#6]-[#6](=[#16])-[#6]	PAINS
378	sulfonamide_B(41)	[H]N(c1ccc([O;H1])cc1)S(=O)=O	PAINS
379	anil_no_alk(40)	c:1(:c(:c(:c(:c(:c:1-[#1])-[#1])-[$([#8]),$([#7]),$([#6](-[#1])-[#1])])-[#1])-[#1])-[#7](-[#1])-[#1]	PAINS
380	thiophene_amino_Ab(40)	[$([#1]),$([#6](-[#1])-[#1]),$([#6]:[#6])]-c:1:c(:c(:c(:s:1)-[#7](-[#1])-[#6](=[#8])-[#6])-[#6](=[#8])-[#8])-[$([#6]:1:[#6]:[#6]:[#6]:[#6]:[#6]:1),$([#6]:1:[#16]:[#6]:[#6]:[#6]:1)]	PAINS
381	het_pyridiniums_A(39)	[H]c1c([$([N]),$([H])])ccc2ccc[n+]([$([O;X1]),$([C;H3]),$([#6][#6]:[#6]),$([#6][#6][#8]),$([#6][#6](C)=[#8]),$([#6][#6](N)=[#8]),$([#6][#6][#6])])c12	PAINS
382	anthranil_one_A(38)	CC(=O)c1ccccc1[#7;H1][!$([#6]=[#8])]	PAINS
383	cyano_imine_A(37)	[#7;H1][#7]=[#6](-[#6]#[#7])-[#6]=[!#6&!#1;!R]	PAINS
384	diazox_sulfon_A(36)	[#7](-c:1:c:c:c:c:c:1)-[#16](=[#8])(=[#8])-[#6]:2:[#6]:[#6]:[#6]:[#6]:3:[#7]:[$([#8]),$([#16])]:[#7]:[#6]:2:3	PAINS
385	hzone_anil_di_alk(35)	[#6](-[#1])(-[#1])-[#7](-[#6](-[#1])-[#1])-c:1:c(:c(:c(:c(:c:1-[#1])-[#1])-[#6](-[#1])=[#7]-[#7]-[$([#6](=[#8])-[#6](-[#1])(-[#1])-[#16]-[#6]:[#7]),$([#6](=[#8])-[#6](-[#1])(-[#1])-[!#1]:[!#1]:[#7]),$([#6](=[#8])-[#6]:[#6]-[#8]-[#1]),$([#6]:[#7]),$([#6](-[#1])(-[#1])-[#6](-[#1])-[#8]-[#1])])-[#1])-[#1]	PAINS
386	rhod_sat_A(33)	[#7]-1-[#6](=[#16])-[#16]-[#6;X4]-[#6]-1=[#8]	PAINS
387	hzone_enamin(30)	[#7][#7]=[#6][#6](-[$([#1]),$([#6])])=[#6]([#6])-!@[$([#7]),$([#8])]	PAINS
388	pyrrole_B(29)	[#6;X4]c1ccc([#6]:[#6])n1c2ccccc2	PAINS
389	thiophene_hydroxy(28)	s1ccc(c1)-[#8;H1]	PAINS
390	cyano_pyridone_B(27)	[!#6][#6]1=,:[#7][#6]([#6])=,:[#6](C#N)[#6](=O)[#7]1	PAINS
391	imine_one_sixes(27)	[#6]-1(-[#6](=[#8])-[#7]-[#6](=[#8])-[#7]-[#6]-1=[#8])=[#7]	PAINS
392	dyes5A(27)	[#6]=,:[#6]:[#7]([#6])~[#6]:[#6]=,:[#6][#6]~[#6]:[#7]	PAINS
393	naphth_amino_A(25)	c1cc2cccc3[#7][#6]=,:[#7]c(c1)c23	PAINS
394	naphth_amino_B(25)	[C;X4]1[N;H1]c3cccc2cccc([N;H1]1)c23	PAINS
395	ene_one_ester(24)	[#6]-[#8]-[#6](=[#8])-[#6](-[#7][#6])=[#6]-[#6](-[#6])=[#8]	PAINS
396	thio_dibenzo(23)	S=[#6]1[#6]=,:[#6][!#6,!#6][#6]=,:[#6]1	PAINS
397	cyano_cyano_A(23)	[#6](-[#6]#[#7])(-[#6]#[#7])-[#6](-[$([#6]#[#7]),$([#6]=[#7])])-[#6]#[#7]	PAINS
398	hzone_acyl_naphthol(22)	[H]c2c([H])c([H])c1c([H])c(C(=O)NN=C)c(O)c([H])c1c2[H]	PAINS
399	het_65_A(21)	O=Cc1cnn2c([#8;H1])ccnc12	PAINS
400	imidazole_A(19)	n:1:c(:n(:c(:c:1-c:2:c:c:c:c:c:2)-c:3:c:c:c:c:c:3)-[#1])-[#6]:[!#1]	PAINS
401	ene_cyano_A(19)	[#6](-[#6]#[#7])(-[#6]#[#7])=[#6]-c:1:c:c:c:c:c:1	PAINS
402	anthranil_acid_A(19)	C=NNc1ccccc1C(=O)[#8;H1]	PAINS
403	dyes3A(19)	[#6]-,:[#6]:[#7+]=,:[#6][#6]=[#6][#7][#6;X4]	PAINS
404	dhp_bis_amino_CN(19)	[#6]=,:[#6]C1C(C#N)=C(N)SC(N)=C1C#N	PAINS
405	het_6_tetrazine(18)	[#7]~[#6]:1:[#7]:[#7]:[#6](:[$([#7]),$([#6]-[#1]),$([#6]-[#7]-[#1])]:[$([#7]),$([#6]-[#7])]:1)-[$([#7]-[#1]),$([#8]-[#6](-[#1])-[#1])]	PAINS
406	ene_one_hal(17)	[#6]-[#6]=[#6](-[F,Cl,Br,I])-[#6](=[#8])-[#6]	PAINS
407	cyano_imine_B(17)	N#CC(C#N)=NNc1ccccc1	PAINS
408	thiaz_ene_B(17)	[#6]NC(=O)-!@[#6]1=,:[#6]([$([N]),$(NC(=O)[#6]:[#6])])[#7]([$([#6;H2]-[#6;H1]=[#6;H2]),$([#6]=,:[#6])])[#6](=S)[#16]1	PAINS
409	ene_rhod_B(16)	[H]C([$([#6]-[#35]),$([#6]:[#6](-[#1]):[#6](-[F,Cl,Br,I]):[#6]:[#6]-[F,Cl,Br,I]),$([#6]:[#6](-[#1]):[#6](-[#1]):[#6]-[#16]-[#6](-[#1])-[#1]),$([#6]:[#6]:[#6]:[#6]:[#6]:[#6]:[#6]:[#6]:[#6]:[#6]-[#8]-[#6;H2]),$([#6]:1:[#6](-[#6;H2]):[#7](-[#6;H2]):[#6](-[#6;H2]):[#6]:1)])=C1SC(=O)[N]C1=O	PAINS
410	thio_carbonate_A(15)	[#7,#8]c2ccc1oc(=[#8,#16])sc1c2	PAINS
411	anil_di_alk_furan_A(15)	[#7](-[#6](-[#1])-[#1])(-[#6](-[#1])-[#1])-c:1:c(:c(:c(:o:1)-[#6]=[#7]-[#7](-[#1])-[#6]=[!#6&!#1])-[#1])-[#1]	PAINS
412	ene_five_het_F(15)	O=[#6]2[#6](=!@[#6]c1ccccc1)Sc3ccccc23	PAINS
413	anil_di_alk_F(14)	c:1:c:c(:c:c:c:1-[#6;X4]-c:2:c:c:c(:c:c:2)-[#7](-[$([#1]),$([#6;X4])])-[$([#1]),$([#6;X4])])-[#7](-[$([#1]),$([#6;X4])])-[$([#1]),$([#6;X4])]	PAINS
414	hzone_anil(14)	c:1(:c(:c(:c(:c(:c:1-[#1])-[#1])-[#7](-[#1])-[#1])-[#1])-[#1])-[#6]=[#7]-[#7]-[#1]	PAINS
415	het_5_pyrazole_OH(14)	c1(nn(c(c1-[$([#1]),$([#6]-[#1])])-[#8]-[#1])-c:2:c(:c(:c(:c(:c:2-[#1])-[#1])-[#1])-[#1])-[#1])-[#6;X4]	PAINS
416	het_thio_666_A(13)	c:2(:c:1-[#16]-c:3:c(-[#7](-c:1:c(:c(:c:2-[#1])-[#1])-[#1])-[$([#1]),$([#6](-[#1])(-[#1])-[#1]),$([#6](-[#1])(-[#1])-[#6]-[#1])]):c(:c(~[$([#1]),$([#6]:[#6])]):c(:c:3-[#1])-[$([#1]),$([#7](-[#1])-[#1]),$([#8]-[#6;X4])])~[$([#1]),$([#7](-[#1])-[#6;X4]),$([#6]:[#6])])-[#1]	PAINS
417	styrene_A(13)	[#6]-2-[#6]-c:1:c(:c:c:c:c:1)-[#6](-c:3:c:c:c:c:c-2:3)=[#6]-[#6]	PAINS
418	ene_rhod_C(13)	[#16]-1-[#6](=[#7]-[#6]:[#6])-[#7](-[$([#1]),$([#6](-[#1])(-[#1])-[#6](-[#1])(-[#1])-[#8]),$([#6]:[#6])])-[#6](=[#8])-[#6]-1=[#6](-[#1])-[$([#6]:[#6]:[#6]-[#17]),$([#6]:[!#6&!#1])]	PAINS
419	dhp_amino_CN_A(13)	[#7](-[#1])(-[#1])-[#6]-1=[#6](-[#6]#[#7])-[#6](-[#1])(-[#6]:[#6])-[#6](=[#6](-[#6]=[#6])-[#8]-1)-[#6](-[#1])-[#1]	PAINS
420	cyano_imine_C(12)	[#8]=[#16](=[#8])-[#6](-[#6]#[#7])=[#7]-[#7]-[#1]	PAINS
421	thio_urea_A(12)	c:1:c:c:c:c:c:1-[#7](-[#1])-[#6](=[#16])-[#7](-[#1])-[#6](-[#1])(-[#1])-[#6](-[#1])(-[#1])-[#6](-[#1])(-[#1])-[#7](-[#6](-[#1])-[#1])-c:2:c:c:c:c:c:2	PAINS
422	thiophene_amino_B(12)	c:1:c(:c:c:c:c:1)-[#7](-[#1])-c:2:c(:c(:c(:s:2)-[$([#6]=[#8]),$([#6]#[#7]),$([#6](-[#8]-[#1])=[#6])])-[#7])-[$([#6]#[#7]),$([#6](:[#7]):[#7])]	PAINS
423	keto_keto_beta_B(12)	[#6;X4]-1-[#6](=[#8])-[#7]-[#7]-[#6]-1=[#8]	PAINS
424	keto_phenone_A(11)	c:1:c-3:c(:c:c:c:1)-[#6]:2:[#7]:[!#1]:[#6]:[#6]:[#6]:2-[#6]-3=[#8]	PAINS
425	cyano_pyridone_C(11)	[#6]-1(-[#6](=[#6](-[#6]#[#7])-[#6](~[#8])~[#7]~[#6]-1~[#8])-[#6](-[#1])-[#1])=[#6](-[#1])-[#6]:[#6]	PAINS
426	thiaz_ene_C(11)	[#6]-1(=[#6](-!@[#6]=[#7])-[#16]-[#6](-[#7]-1)=[#8])-[$([F,Cl,Br,I]),$([#7+](:[#6]):[#6])]	PAINS
427	hzone_thiophene_A(11)	c:1:2:c(:c(:c(:c(:c:1-[#1])-[#1])-[#1])-[#1]):[!#6&!#1]:[#6](:[#6]:2-[#6](-[#1])=[#7]-[#7](-[#1])-[$([#6]:1:[#7]:[#6]:[#6](-[#1]):[#16]:1),$([#6]:[#6](-[#1]):[#6]-[#1]),$([#6]:[#7]:[#6]:[#7]:[#6]:[#7]),$([#6]:[#7]:[#7]:[#7]:[#7])])-[$([#1]),$([#8]-[#1]),$([#6](-[#1])-[#1])]	PAINS
428	ene_quin_methide(10)	[!#1]:[!#1]-[#6](-[$([#1]),$([#6]#[#7])])=[#6]-1-[#6]=:[#6]-[#6](=[$([#8]),$([#7;!R])])-[#6]=:[#6]-1	PAINS
429	het_thio_676_A(10)	c:1:c:c-2:c(:c:c:1)-[#6]-[#6](-c:3:c(-[#16]-2):c(:c(-[#1]):c(:c:3-[#1])-[$([#1]),$([#8]),$([#16;X2]),$([#6;X4]),$([#7](-[$([#1]),$([#6;X4])])-[$([#1]),$([#6;X4])])])-[#1])-[#7](-[$([#1]),$([#6;X4])])-[$([#1]),$([#6;X4])]	PAINS
430	ene_five_het_G(10)	[#6]-1(=[#6])-[#6](-[#7,#16,#8][#6](-[!#1])=[#7]-1)=[#8]	PAINS
431	acyl_het_A(9)	[#7+](:[!#1]:[!#1]:[!#1])-[!#1]=[#8]	PAINS
432	anil_di_alk_G(9)	[#6;X4]-[#7](-[#6;X4])-c:1:c(:c(:c(:c(:c:1-[#1])-[#1])-[#6]2=:[#7][#6]:[#6]:[!#1]2)-[#1])-[#1]	PAINS
433	dhp_keto_A(9)	[#7]-1(-[$([#6;X4]),$([#1])])-[#6]=:[#6](-[#6](=[#8])-[#6]:[#6]:[#6])-[#6](-[#6])-[#6](=[#6]-1-[#6](-[#1])(-[#1])-[#1])-[$([#6]=[#8]),$([#6]#[#7])]	PAINS
434	thio_urea_B(9)	c:1:c:c:c:c:c:1-[#7](-[#1])-[#6](=[#16])-[#7](-[#1])-[#6](-[#1])(-[#1])-[#6](-[#1])(-[#1])-[#7](-[#6](-[#1])-[#1])-c:2:c:c:c:c:c:2	PAINS
435	anil_alk_bim(9)	c:1:3:c(:c(:c(:c(:c:1-[#1])-[#1])-[#7](-[#1])-[#6](-[#1])(-[#1])-c:2:c:c:c:c:c:2)-[#1]):n:c(-[#1]):n:3-[#6]	PAINS
436	imine_imine_A(9)	c:1:c:c-2:c(:c:c:1)-[#7]=[#6]-[#6]-2=[#7;!R]	PAINS
437	thio_urea_C(9)	c:1(:c:c:c:c:c:1)-[#7](-[#1])-[#6](=[#16])-[#7]-[#7](-[#1])-[#6](=[#8])-[#6]-2:[!#1]:[!#6&!#1]:[#6]:[#6]-2	PAINS
438	imine_one_fives_B(9)	[#7;!R]=[#6]-2-[#6](=[#8])-c:1:c:c:c:c:c:1-[#16]-2	PAINS
439	dhp_amino_CN_B(9)	[$([#7](-[#1])-[#1]),$([#8]-[#1])]-[#6]-2=[#6](-[#6]#[#7])-[#6](-[#1])(-[#6]:[#6])-c:1:c(:n(-[#6]):n:c:1)-[#8]-2	PAINS
440	anil_OC_no_alk_A(8)	[#7](-[#1])(-[#1])-c:1:c(:c(:c(:n:c:1-[#1])-[#8]-c:2:c:c:c:c:c:2)-[#1])-[#1]	PAINS
441	het_thio_66_one(8)	[#6](=[#8])-[#6]-1=[#6]-[#7]-c:2:c(-[#16]-1):c:c:c:c:2	PAINS
442	styrene_B(8)	c:1:c:c-2:c(:c:c:1)-[#6](-c:3:c(-[$([#16;X2]),$([#6;X4])]-2):c:c:c(:c:3)-[$([#1]),$([#17]),$([#6;X4])])=[#6]-[#6]	PAINS
443	het_thio_5_A(8)	[#6](-[#1])(-[#1])-[#16;X2]-c:1:n:c(:c(:n:1-!@[#6](-[#1])-[#1])-c:2:c:c:c:c:c:2)-[#1]	PAINS
444	anil_di_alk_ene_A(8)	[#6](-[#1])(-[#1])-[#7](-[#6](-[#1])-[#1])-[#6]-2=[#6](-[#1])-c:1:c(:c:c:c:c:1)-[#16;X2]-c:3:c-2:c:c:c:c:3	PAINS
445	ene_rhod_D(8)	[#16]-1-[#6](=!@[#7]-[$([#1]),$([#7](-[#1])-[#6]:[#6])])-[#7](-[$([#1]),$([#6]:[#7]:[#6]:[#6]:[#16])])-[#6](=[#8])-[#6]-1=[#6](-[#1])-[#6]:[#6]-[$([#17]),$([#8]-[#6]-[#1])]	PAINS
446	ene_rhod_E(8)	[#16]-1-[#6](=[#8])-[#7]-[#6](=[#16])-[#6]-1=[#6](-[#1])-[#6]:[#6]	PAINS
447	anil_OH_alk_A(8)	c:1:c(:c:c:c:c:1)-[#6](-[#1])(-[#1])-[#7](-[#1])-c:2:c(:c(:c(:c(:c:2-[#1])-[#1])-[#8]-[#1])-[#1])-[#1]	PAINS
448	pyrrole_C(8)	n1(-[#6;X4])c(c(-[#1])c(c1-[#6]:[#6])-[#1])-[#6](-[#1])-[#1]	PAINS
449	thio_urea_D(8)	c:1(:c:c:c:c:c:1)-[#7](-[#1])-[#6](=[#16])-[#7]-[#7](-[#1])-c:2:c:c:c:c:c:2	PAINS
450	thiaz_ene_D(8)	[#7](-c:1:c:c:c:c:c:1)-c2[n+]c(cs2)-c:3:c:c:c:c:c:3	PAINS
451	ene_rhod_F(8)	n:1:c:c:c(:c:1-[#6](-[#1])-[#1])-[#6](-[#1])=[#6]-2-[#6](=[#8])-[#7]-[#6](=[!#6&!#1])-[#7]-2	PAINS
452	thiaz_ene_E(8)	[#6]-1(=[#6](-[#6](-[#1])(-[#6])-[#6])-[#16]-[#6](-[#7]-1-[$([#1]),$([#6](-[#1])-[#1])])=[#8])-[#16]-[#6;R]	PAINS
453	het_65_B(7)	[!#1]:1:[!#1]-2:[!#1](:[!#1]:[!#1]:[!#1]:1)-[#7](-[#1])-[#7](-[#6]-2=[#8])-[#6]	PAINS
454	keto_keto_beta_C(7)	c:1:c:c-2:c(:c:c:1)-[#6](=[#6](-[#6]-2=[#8])-[#6])-[#8]-[#1]	PAINS
455	het_66_A(7)	c:2:c:c:1:n:n:c(:n:c:1:c:c:2)-[#6](-[#1])(-[#1])-[#6]=[#8]	PAINS
456	thio_urea_E(7)	c:1:c:c:c:c:c:1-[#7](-[#1])-[#6](=[#16])-[#7](-[#1])-[#6](-[#1])(-[#1])-c:2:n:c:c:c:c:2	PAINS
457	thiophene_amino_C(7)	[#6](-[#1])-[#6](-[#1])(-[#1])-c:1:c(:c(:c(:s:1)-[#7](-[#1])-[#6](=[#8])-[#6]-[#6]-[#6]=[#8])-[$([#6](=[#8])-[#8]),$([#6]#[#7])])-[#6](-[#1])-[#1]	PAINS
458	hzone_phenone(7)	[#6](-c:1:c(:c(:c(:c:c:1-[#1])-[$([#6;X4]),$([#1])])-[#1])-[#1])(-c:2:c(:c(:c(:c(:c:2-[#1])-[#1])-[$([#1]),$([#17])])-[#1])-[#1])=[$([#7]-[#8]-[#6](-[#1])(-[#1])-[#6](-[#1])(-[#1])-[#6](-[#1])(-[#1])-[#7](-[#6](-[#1])-[#1])-[#6](-[#1])-[#1]),$([#7]-[#8]-[#6](-[#1])(-[#1])-[#6](-[#1])(-[#1])-[#7](-[#6](-[#1])-[#1])-[#6](-[#1])-[#1]),$([#7]-[#7](-[#1])-[#6](=[#7]-[#1])-[#7](-[#1])-[#1]),$([#6](-[#1…	PAINS
459	ene_rhod_G(7)	[#8](-[#1])-[#6](=[#8])-c:1:c:c(:c:c:c:1)-[#6]:[!#1]:[#6]-[#6](-[#1])=[#6]-2-[#6](=[!#6&!#1])-[#7]-[#6](=[!#6&!#1])-[!#6&!#1]-2	PAINS
460	ene_cyano_B(7)	[#6]-1(=[#6]-[#6](-c:2:c:c(:c(:n:c-1:2)-[#7](-[#1])-[#1])-[#6]#[#7])=[#6])-[#6]#[#7]	PAINS
461	dhp_amino_CN_C(7)	[#7](-[#1])(-[#1])-[#6]-1=[#6](-[#6]#[#7])-[#6](-[#1])(-[#6]:[#6])-[#6](=[#6](-[#6]:[#6])-[#8]-1)-[#6]#[#7]	PAINS
462	het_5_A(7)	[#7]-2(-c:1:c:c:c:c:c:1)-[#7]=[#6](-[#6]=[#8])-[#6;X4]-[#6]-2=[#8]	PAINS
463	ene_five_het_H(6)	[#7]-1=[#6]-[#6](-[#6](-[#7]-1)=[#16])=[#6]	PAINS
464	thio_amide_A(6)	c1(coc(c1-[#1])-[#6](=[#16])-[#7]-2-[#6](-[#1])(-[#1])-[#6](-[#1])(-[#1])-[!#1]-[#6](-[#1])(-[#1])-[#6]-2(-[#1])-[#1])-[#1]	PAINS
465	ene_cyano_C(6)	[#6]=[#6](-[#6]#[#7])-[#6](=[#7]-[#1])-[#7]-[#7]	PAINS
466	hzone_furan_A(6)	c:1(:c(:c(:c(:o:1)-[$([#1]),$([#6](-[#1])-[#1])])-[#1])-[#1])-[#6](-[$([#1]),$([#6](-[#1])-[#1])])=[#7]-[#7](-[#1])-c:2:n:c:c:s:2	PAINS
467	anil_di_alk_H(6)	c:1(:c(:c(:c(:c(:c:1-[#7](-[#1])-[#16](=[#8])(=[#8])-[#6]:2:[#6]:[!#1]:[#6]:[#6]:[#6]:2)-[#1])-[#7](-[#6](-[#1])-[#1])-[#6](-[#1])-[#1])-[#1])-[#1])-[#1]	PAINS
468	het_65_C(6)	n2c1ccccn1c(c2-[$([#6](-[!#1])=[#6](-[#1])-[#6]:[#6]),$([#6]:[#8]:[#6])])-[#7]-[#6]:[#6]	PAINS
469	thio_urea_F(6)	[#6]-1-[#7](-[#1])-[#7](-[#1])-[#6](=[#16])-[#7]-[#7]-1-[#1]	PAINS
470	ene_five_het_I(6)	c:1(:c:c:c:o:1)-[#6](-[#1])=!@[#6]-3-[#6](=[#8])-c:2:c:c:c:c:c:2-[!#6&!#1]-3	PAINS
471	keto_keto_gamma(5)	[#8]=[#6]-1-[#6;X4]-[#6]-[#6](=[#8])-c:2:c:c:c:c:c-1:2	PAINS
472	quinone_B(5)	c:1:c:c-2:c(:c:c:1)-[#6](-c3cccc4noc-2c34)=[#8]	PAINS
473	het_6_pyridone_OH(5)	[#8](-[#1])-c:1:n:c(:c:c:c:1)-[#8]-[#1]	PAINS
474	hzone_naphth_A(5)	c:1:2:c(:c(:c(:c(:c:1:c(:c(:c(:c:2-[#1])-[#1])-[#6]=[#7]-[#7](-[#1])-[$([#6]:[#6]),$([#6]=[#16])])-[#1])-[#1])-[#1])-[#1])-[#1]	PAINS
475	thio_ester_A(5)	[#6]-1=[#6](-[#16]-[#6](-[#6]=[#6]-1)=[#16])-[#7]	PAINS
476	ene_misc_A(5)	[#6]-1=[#6]-[#6](-[#8]-[#6]-1-[#8])(-[#8])-[#6]	PAINS
477	cyano_pyridone_D(5)	[#8]=[#6]-1-[#6](=[#6]-[#6](=[#7]-[#7]-1)-[#6]=[#8])-[#6]#[#7]	PAINS
478	het_65_Db(5)	C3=CN1C(=NC(=C1-[#7]-[#6])-c:2:c:c:c:c:n:2)C=C3	PAINS
479	het_666_A(5)	[#7]N-2-c:1:c:c:c:c:c:1-[#6](=[#7])-c:3:c-2:c:c:c:c:3	PAINS
480	diazox_sulfon_B(5)	c:1:c(:c:c:c:c:1)-[#7]-2-[#6](-[#1])-[#6](-[#1])-[#7](-[#6](-[#1])-[#6]-2-[#1])-[#16](=[#8])(=[#8])-c:3:c:c:c:c:4:n:s:n:c:3:4	PAINS
481	anil_NH_alk_A(5)	c:1(:c(:c-2:c(:c(:c:1-[#1])-[#1])-[#7](-[#6](-[#7]-2-[#1])=[#8])-[#1])-[#1])-[#7](-[#1])-[#6](-[#1])-[#1]	PAINS
482	sulfonamide_C(5)	c:1(:c(:c-3:c(:c(:c:1-[#7](-[#1])-[#16](=[#8])(=[#8])-c:2:c:c:c(:c:c:2)-[!#6&!#1])-[#1])-[#8]-[#6](-[#8]-3)(-[#1])-[#1])-[#1])-[#1]	PAINS
483	het_thio_N_55(5)	[#6](-[#1])-[#6]:2:[#7]:[#7](-c:1:c:c:c:c:c:1):[#16]:3:[!#6&!#1]:[!#1]:[#6]:[#6]:2:3	PAINS
484	keto_keto_beta_D(5)	[#8]=[#6]-[#6]=[#6](-[#1])-[#8]-[#1]	PAINS
485	ene_rhod_H(5)	[#7]-1-2-[#6](=[#7]-[#6](=[#8])-[#6](=[#7]-1)-[#6](-[#1])-[#1])-[#16]-[#6](=[#6](-[#1])-[#6]:[#6])-[#6]-2=[#8]	PAINS
486	imine_ene_A(5)	[#6]:[#6]-[#6](-[#1])=[#6](-[#1])-[#6](-[#1])=[#7]-[#7](-[#6;X4])-[#6;X4]	PAINS
487	het_thio_656a(5)	c:1:3:c(:c:c:c:c:1):c:2:n:n:c(-[#16]-[#6](-[#1])(-[#1])-[#6]=[#8]):n:c:2:n:3-[#6](-[#1])(-[#1])-[#6](-[#1])=[#6](-[#1])-[#1]	PAINS
488	pyrrole_D(5)	n1(-[#6])c(c(-[#1])c(c1-[#6](-[#1])(-[#1])-[#7](-[#1])-[#6](=[#16])-[#7]-[#1])-[#1])-[#1]	PAINS
489	pyrrole_E(5)	n2(-[#6]:1:[!#1]:[!#6&!#1]:[!#1]:[#6]:1-[#1])c(c(-[#1])c(c2-[#6;X4])-[#1])-[#6;X4]	PAINS
490	thio_urea_G(5)	c:1(:c:c:c:c:c:1)-[#7](-[#1])-[#6](=[#16])-[#7]-[#7](-[#1])-[#6]([#7;R])[#7;R]	PAINS
491	anisol_A(5)	c:1(:c(:c(:c(:c(:c:1-[$([#1]),$([#6](-[#1])-[#1])])-[#1])-[#8]-[#6](-[#1])-[#1])-[#6](-[#1])(-[#1])-[$([#7](-[#1])-[#6](=[#8])-[#6](-[#1])(-[#1])-[#6](-[#1])(-[#1])-[#6](-[#1])-[#1]),$([#6](-[#1])(-[#6](-[#1])-[#1])-[#7](-[#1])-[#6](=[#16])-[#7]-[#1])])-[#1])-[#8]-[#6](-[#1])-[#1]	PAINS
492	pyrrole_F(5)	n2(-[#6]:1:[#6](-[#6]#[#7]):[#6]:[#6]:[!#6&!#1]:1)c(c(-[#1])c(c2)-[#1])-[#1]	PAINS
493	dhp_amino_CN_D(5)	[#7](-[#1])(-[#1])-[#6]-2=[#6](-[#6]#[#7])-[#6](-[#1])(-[#6]:[#6])-c:1:c(:c:c:s:1)-[#8]-2	PAINS
494	thiazole_amine_A(4)	[#7](-[#1])-c:1:n:c(:c:s:1)-c:2:c:n:c(-[#7](-[#1])-[#1]):s:2	PAINS
495	het_6_imidate_A(4)	[#7]=[#6]-1-[#7](-[#1])-[#6](=[#6](-[#7]-[#1])-[#7]=[#7]-1)-[#7]-[#1]	PAINS
496	anil_OC_no_alk_B(4)	c:1:c(:c:2:c(:c:c:1):c:c:c:c:2)-[#8]-c:3:c(:c(:c(:c(:c:3-[#1])-[#1])-[#7]-[#1])-[#1])-[#1]	PAINS
497	styrene_C(4)	c:1:c:c-2:c(:c:c:1)-[#6]-[#16]-c3c(-[#6]-2=[#6])ccs3	PAINS
498	azulene(4)	c:2:c:c:c:1:c(:c:c:c:1):c:c:2	PAINS
499	furan_acid_A(4)	c:1(:c(:c(:c(:o:1)-[#6](-[#1])-[#1])-[#6](-[#1])(-[#1])-[#8]-[#6]:[#6])-[#1])-[#6](=[#8])-[#8]-[#1]	PAINS
500	cyano_pyridone_E(4)	[!#1]:[#6]-[#6]-1=[#6](-[#1])-[#6](=[#6](-[#6]#[#7])-[#6](=[#8])-[#7]-1-[#1])-[#6]:[#8]	PAINS
501	anil_alk_thio(4)	[#6]-1-3=[#6](-[#6](-[#7]-c:2:c:c:c:c:c-1:2)(-[#6])-[#6])-[#16]-[#16]-[#6]-3=[!#1]	PAINS
502	anil_di_alk_I(4)	c:1(:c(:c(:c(:c(:c:1-[#7](-[#1])-[#6](=[#8])-c:2:c:c:c:c:c:2)-[#1])-[#7](-[#6](-[#1])-[#1])-[#6](-[#1])-[#1])-[#1])-[#1])-[#1]	PAINS
503	het_thio_6_furan(4)	[#6](-[#1])(-[#1])-[#16;X2]-c:1:n:n:c(:c(:n:1)-c:2:c(:c(:c(:o:2)-[#1])-[#1])-[#1])-c:3:c(:c(:c(:o:3)-[#1])-[#1])-[#1]	PAINS
504	anil_di_alk_ene_B(4)	[#6](-[#1])(-[#1])-[#7](-[#6](-[#1])-[#1])-[#6]-2=[#6]-c:1:c(:c:c:c:c:1)-[#6]-2(-[#1])-[#1]	PAINS
505	imine_one_B(4)	[#7](-[#1])(-c:1:c:c:c:c:c:1)-[#7]=[#6](-[#6](=[#8])-[#6](-[#1])-[#1])-[#7](-[#1])-[$([#7]-[#1]),$([#6]:[#6])]	PAINS
506	anil_OC_alk_A(4)	c:1:2:c(:c(:c(:c(:c:1-[#1])-[#1])-[#1])-[#1]):o:c:3:c(-[#1]):c(:c(-[#8]-[#6](-[#1])-[#1]):c(:c:2:3)-[#1])-[#7](-[#1])-[#6](-[#1])-[#1]	PAINS
507	ene_five_het_J(4)	[#16]=[#6]-1-[#7](-[#1])-[#6]=[#6]-[#6]-2=[#6]-1-[#6](=[#8])-[#8]-[#6]-2=[#6]-[#1]	PAINS
508	pyrrole_G(4)	n2(-c:1:c(:c:c(:c(:c:1)-[#1])-[$([#7](-[#1])-[#1]),$([#6]:[#7])])-[#1])c(c(-[#1])c(c2-[#1])-[#1])-[#1]	PAINS
509	ene_five_het_K(4)	n1(-[#6])c(c(-[#1])c(c1-[#6](-[#1])=[#6]-2-[#6](=[#8])-[!#6&!#1]-[#6]=:[!#1]-2)-[#1])-[#1]	PAINS
510	cyano_ene_amine_B(4)	[#6]=[#6]-[#6](-[#6]#[#7])(-[#6]#[#7])-[#6](-[#6]#[#7])=[#6]-[#7](-[#1])-[#1]	PAINS
511	thio_ester_B(4)	[#6]:[#6]-[#6](=[#16;X1])-[#16;X2]-[#6](-[#1])-[$([#6](-[#1])-[#1]),$([#6]:[#6])]	PAINS
512	ene_five_het_L(4)	[#8]=[#6]-3-[#6](=!@[#6](-[#1])-c:1:c:n:c:c:1)-c:2:c:c:c:c:c:2-[#7]-3	PAINS
513	hzone_thiophene_B(4)	c:1(:c(:c(:c(:s:1)-[#1])-[#1])-[$([#1]),$([#6](-[#1])-[#1])])-[#6](-[#1])=[#7]-[#7](-[#1])-c:2:c:c:c:c:c:2	PAINS
514	dhp_amino_CN_E(4)	[#6](-[#1])(-[#1])-[#16;X2]-[#6]-1=[#6](-[#6]#[#7])-[#6](-[#1])(-[#6]:[#6])-[#6](-[#6]#[#7])-[#6](=[#8])-[#7]-1	PAINS
515	het_5_B(4)	[#7]-2(-c:1:c:c:c:c:c:1)-[#7]=[#6](-[#7](-[#1])-[#6]=[#8])-[#6](-[#1])(-[#1])-[#6]-2=[#8]	PAINS
516	imine_imine_B(3)	[#6]:[#6]-[#6](-[#1])=[#6](-[#1])-[#6](-[#1])=[#7]-[#7]=[#6]	PAINS
517	thiazole_amine_B(3)	c:1(:c:c:c(:c:c:1)-[#6](-[#1])-[#1])-c:2:c(:s:c(:n:2)-[#7](-[#1])-[#1])-[#6](-[#1])(-[#1])-[#1]	PAINS
518	imine_ene_one_A(3)	[#6]-2(-[#6]=[#7]-c:1:c:c:c:c:c:1-[#7]-2)=[#6](-[#1])-[#6]=[#8]	PAINS
519	diazox_A(3)	[#8](-c:1:c:c:c:c:c:1)-c:3:c:c:2:n:o:n:c:2:c:c:3	PAINS
520	ene_one_A(3)	[!#1]:1:[!#1]:[!#1]:[!#1](:[!#1]:[!#1]:1)-[#6](-[#1])=[#6](-[#1])-[#6](-[#7]-c:2:c:c:c:3:c(:c:2):c:c:c(:n:3)-[#7](-[#6])-[#6])=[#8]	PAINS
521	anil_OC_no_alk_C(3)	[#7](-[#1])(-[#1])-c:1:c(:c:c:c:n:1)-[#8]-[#6](-[#1])(-[#1])-[#6]:[#6]	PAINS
522	thiazol_SC_A(3)	[#6]-[#16;X2]-c:1:n:c(:c:s:1)-[#1]	PAINS
523	het_666_B(3)	c:1:c-3:c(:c:c:c:1)-[#7](-c:2:c:c:c:c:c:2-[#8]-3)-[#6](-[#1])(-[#1])-[#6](-[#1])-[#1]	PAINS
524	furan_A(3)	c:1(:c(:c(:c(:o:1)-[#6](-[#1])-[#1])-[#1])-[#1])-[#6](-[#1])(-[#8]-[#1])-[#6]#[#6]-[#6;X4]	PAINS
525	colchicine_A(3)	[#6]-1(-[#6](=[#6]-[#6]=[#6]-[#6]=[#6]-1)-[#7]-[#1])=[#7]-[#6]	PAINS
526	thiophene_C(3)	[#6](-[#1])(-[#1])-[#7](-[#6](-[#1])-[#1])-[#6](-[#1])=[#6]-[#6](=[#8])-c:1:c(-[#16;X2]):s:c(:c:1)-[$([#6]#[#7]),$([#6]=[#8])]	PAINS
527	anil_OC_alk_B(3)	c:1:3:c(:c:c:c:c:1)-[#7]-2-[#6](=[#8])-[#6](=[#6](-[F,Cl,Br,I])-[#6]-2=[#8])-[#7](-[#1])-[#6]:[#6]:[#6]:[#6](-[#8]-[#6](-[#1])-[#1]):[#6]:[#6]:3	PAINS
528	het_thio_66_A(3)	c:1-2:c(:c:c:c:c:1)-[#6](-[#1])(-[#1])-[#6](-[#1])(-[#1])-[#7]=[#6]-2-[#16;X2]-[#6](-[#1])(-[#1])-[#6](=[#8])-c:3:c:c:c:c:c:3	PAINS
529	rhod_sat_B(3)	[#7]-2(-c:1:c:c:c:c:c:1-[#6](-[#1])-[#1])-[#6](=[#16])-[#7](-[#6](-[#1])(-[#1])-[!#1]:[!#1]:[!#1]:[!#1]:[!#1])-[#6](-[#1])(-[#1])-[#6]-2=[#8]	PAINS
530	ene_rhod_I(3)	[#7]-2(-[#6](-[#1])-[#1])-[#6](=[#16])-[#7](-[#1])-[#6](=[#6](-[#1])-c:1:c:c:c:c(:c:1)-[Br])-[#6]-2=[#8]	PAINS
531	keto_thiophene(3)	c:1(:c(:c:2:c(:s:1):c:c:c:c:2)-[#6](-[#1])-[#1])-[#6](=[#8])-[#6](-[#1])(-[#1])-[#6](-[#1])-[#1]	PAINS
532	imine_imine_C(3)	[#7](-[#6](-[#1])-[#1])(-[#6](-[#1])-[#1])-[#6](-[#1])=[#7]-[#6](-[#6](-[#1])-[#1])=[#7]-[#7](-[#6](-[#1])-[#1])-[#6]:[#6]	PAINS
533	het_65_pyridone_A(3)	[#6]:2(:[#6](-[#6](-[#1])-[#1]):[#6]-1:[#6](-[#7]=[#6](-[#7](-[#6]-1=[!#6&!#1;X1])-[#6](-[#1])-[$([#6](=[#8])-[#8]),$([#6]:[#6])])-[$([#1]),$([#16]-[#6](-[#1])-[#1])]):[!#6&!#1;X2]:2)-[#6](-[#1])(-[#1])-[#6](-[#1])-[#1]	PAINS
534	thiazole_amine_C(3)	c:1(:n:c(:c(-[#1]):s:1)-[!#1]:[!#1]:[!#1](-[$([#8]-[#6](-[#1])-[#1]),$([#6](-[#1])-[#1])]):[!#1]:[!#1])-[#7](-[#1])-[#6](-[#1])(-[#1])-c:2:c(-[#1]):c(:c(-[#1]):o:2)-[#1]	PAINS
535	het_thio_pyr_A(3)	n:1:c(:c(:c(:c(:c:1-[#16]-[#6]-[#1])-[#6]#[#7])-c:2:c:c:c(:c:c:2)-[#8]-[#6](-[#1])-[#1])-[#1])-[#6]:[#6]	PAINS
536	melamine_A(3)	c:1:4:c(:n:c(:n:c:1-[#7](-[#1])-[#6](-[#1])(-[#1])-c:2:c(:c(:c(:o:2)-[#1])-[#1])-[#1])-[#7](-[#1])-c:3:c:c(:c(:c:c:3-[$([#1]),$([#6](-[#1])-[#1]),$([#16;X2]),$([#8]-[#6]-[#1]),$([#7;X3])])-[$([#1]),$([#6](-[#1])-[#1]),$([#16;X2]),$([#8]-[#6]-[#1]),$([#7;X3])])-[$([#1]),$([#6](-[#1])-[#1]),$([#16;X2]),$([#8]-[#6]-[#1]),$([#7;X3])]):c:c:c:c:4	PAINS
537	anil_NH_alk_B(3)	[#7](-[#1])(-[#6]:1:[#6]:[#6]:[!#1]:[#6]:[#6]:1)-c:2:c:c:c(:c:c:2)-[#7](-[#1])-[#6]-[#1]	PAINS
538	rhod_sat_C(3)	[#7]-2(-c:1:c:c:c:c:c:1)-[#6](=[#7]-[#6]=[#8])-[#16]-[#6](-[#1])(-[#1])-[#6]-2=[#8]	PAINS
539	thiophene_amino_D(3)	[#6]=[#6]-[#6](=[#8])-[#7]-c:1:c(:c(:c(:s:1)-[#6](=[#8])-[#8])-[#6]-[#1])-[#6]#[#7]	PAINS
540	anil_OC_alk_C(3)	[$([#1]),$([#6](-[#1])-[#1])]-[#8]-c:1:c(:c(:c(:c(:c:1-[#1])-[#1])-[#1])-[#1])-[#7](-[#1])-[#6](-[#1])(-[#1])-c:2:n:c:c:n:2	PAINS
541	het_thio_65_A(3)	[#6](-[#1])(-[#1])-[#16;X2]-c3nc1c(n(nc1-[#6](-[#1])-[#1])-c:2:c:c:c:c:c:2)nn3	PAINS
542	het_thio_656b(3)	[#6]-[#6](=[#8])-[#6](-[#1])(-[#1])-[#16;X2]-c:3:n:n:c:2:c:1:c(:c(:c(:c(:c:1:n(:c:2:n:3)-[#1])-[#1])-[#1])-[#1])-[#1]	PAINS
543	thiazole_amine_D(3)	s:1:c(:[n+](-[#6](-[#1])-[#1]):c(:c:1-[#1])-[#6])-[#7](-[#1])-c:2:c:c:c:c:c:2[$([#6](-[#1])-[#1]),$([#6]:[#6])]	PAINS
544	thio_urea_H(3)	[#6]-2(=[#16])-[#7](-[#6](-[#1])(-[#1])-c:1:c:c:c:o:1)-[#6](=[#7]-[#7]-2-[#1])-[#6]:[#6]	PAINS
545	cyano_pyridone_F(3)	[#7]-2(-c:1:c:c:c:c:c:1)-[#6](=[#8])-[#6](=[#6]-[#6](=[#7]-2)-[#6]#[#7])-[#6]#[#7]	PAINS
546	rhod_sat_D(3)	[#7]-2(-c:1:c:c:c:c:c:1)-[#6](=[#8])-[#16]-[#6](-[#1])(-[#6](-[#1])(-[#1])-[#6](=[#8])-[#7](-[#1])-[#6]:[#6])-[#6]-2=[#8]	PAINS
547	ene_rhod_J(3)	[#6](-[#1])(-[#1])-[#7]-2-[#6](=[$([#16]),$([#7])])-[!#6&!#1]-[#6](=[#6]-1-[#6](=[#6](-[#1])-[#6]:[#6]-[#7]-1-[#6](-[#1])-[#1])-[#1])-[#6]-2=[#8]	PAINS
548	imine_phenol_A(3)	[#6]=[#7;!R]-c:1:c:c:c:c:c:1-[#8]-[#1]	PAINS
549	thio_carbonate_B(3)	[#8]=[#6]-2-[#16]-c:1:c(:c(:c:c:c:1)-[#8]-[#6](-[#1])-[#1])-[#8]-2	PAINS
550	het_thio_N_5A(3)	[#7]=[#6]-1-[#7]=[#6]-[#7]-[#16]-1	PAINS
551	het_thio_N_65A(3)	[#7]-2-[#16]-[#6]-1=[#6](-[#6]:[#6]-[#7]-[#6]-1)-[#6]-2=[#16]	PAINS
552	anil_di_alk_J(3)	[#6](-[#1])(-[#1])-[#7](-[#6](-[#1])-[#1])-c:1:c(:c(:c(:c(:c:1-[#1])-[#1])-[#6](-[#1])=[#7]-[#7]=[#6](-[#6])-[#6]:[#6])-[#1])-[#1]	PAINS
553	pyrrole_H(3)	n1-2cccc1-[#6]=[#7](-[#6])-[#6]-[#6]-2	PAINS
554	ene_cyano_D(3)	[#6](-[#6]#[#7])(-[#6]#[#7])=[#6](-[#16])-[#16]	PAINS
555	cyano_cyano_B(3)	[#6]-1(-[#6]#[#7])(-[#6]#[#7])-[#6](-[#1])(-[#6](=[#8])-[#6])-[#6]-1-[#1]	PAINS
556	ene_five_het_M(3)	[#6]-1=:[#6]-[#6](-[#6](-[$([#8]),$([#16])]-1)=[#6]-[#6]=[#8])=[#8]	PAINS
557	cyano_ene_amine_C(3)	[#6]:[#6]-[#6](=[#8])-[#7](-[#1])-[#6](=[#8])-[#6](-[#6]#[#7])=[#6](-[#1])-[#7](-[#1])-[#6]:[#6]	PAINS
558	thio_urea_I(3)	c:1(:c:c:c:c:c:1)-[#7](-[#1])-[#6](=[#16])-[#7](-[#1])-[#7]=[#6]-c:2:c:n:c:c:2	PAINS
559	dhp_amino_CN_F(3)	[#7](-[#1])(-[#1])-[#6]-2=[#6](-[#6]#[#7])-[#6](-[#1])(-c:1:c:c:c:s:1)-[#6](=[#6](-[#6](-[#1])-[#1])-[#8]-2)-[#6](=[#8])-[#8]-[#6]	PAINS
560	anthranil_acid_B(3)	c:1:c-3:c(:c:c(:c:1)-[#6](=[#8])-[#7](-[#1])-c:2:c(:c:c:c:c:2)-[#6](=[#8])-[#8]-[#1])-[#6](-[#7](-[#6]-3=[#8])-[#6](-[#1])-[#1])=[#8]	PAINS
561	diazox_B(3)	[Cl]-c:2:c:c:1:n:o:n:c:1:c:c:2	PAINS
562	thio_aldehyd_A(3)	[#6]-[#6](=[#16])-[#1]	PAINS
563	thio_amide_B(2)	[#6;X4]-[#7](-[#1])-[#6](-[#6]:[#6])=[#6](-[#1])-[#6](=[#16])-[#7](-[#1])-c:1:c:c:c:c:c:1	PAINS
564	imidazole_B(2)	[#6](-[#1])(-[#1])-[#6](-[#1])(-[#1])-[#16]-[#6](-[#1])(-[#1])-c1cn(cn1)-[#1]	PAINS
565	thiazole_amine_E(2)	[#8]=[#6]-[#7](-[#1])-c:1:c(-[#6]:[#6]):n:c(-[#6](-[#1])(-[#1])-[#6]#[#7]):s:1	PAINS
566	thiazole_amine_F(2)	[#6](-[#1])-[#7](-[#1])-c:1:n:c(:c:s:1)-c2cnc3n2ccs3	PAINS
567	thio_ester_C(2)	[#7]-1-[#6](=[#8])-[#6](=[#6](-[#6])-[#16]-[#6]-1=[#16])-[#1]	PAINS
568	ene_one_B(2)	[#6](-[#16])(-[#7])=[#6](-[#1])-[#6]=[#6](-[#1])-[#6]=[#8]	PAINS
569	quinone_C(2)	[#8]=[#6]-3-c:1:c(:c:c:c:c:1)-[#6]-2=[#6](-[#8]-[#1])-[#6](=[#8])-[#7]-c:4:c-2:c-3:c:c:c:4	PAINS
570	keto_naphthol_A(2)	c:1:2:c:c:c:c(:c:1:c(:c:c:c:2)-[$([#8]-[#1]),$([#7](-[#1])-[#1])])-[#6](-[#6])=[#8]	PAINS
571	thio_amide_C(2)	[#6](-[#1])(-c:1:c:c:c:c:c:1)(-c:2:c:c:c:c:c:2)-[#6](=[#16])-[#7]-[#1]	PAINS
572	phthalimide_misc(2)	[#7]-2(-[#6](=[#8])-c:1:c(:c(:c(:c(:c:1-[#1])-[#6](=[#8])-[#8]-[#1])-[#1])-[#1])-[#6]-2=[#8])-c:3:c(:c:c(:c(:c:3)-[#1])-[#8])-[#1]	PAINS
573	sulfonamide_D(2)	c:1:c:c(:c:c:c:1-[#7](-[#1])-[#16](=[#8])=[#8])-[#7](-[#1])-[#16](=[#8])=[#8]	PAINS
574	anil_NH_alk_C(2)	[#6](-[#1])-[#7](-[#1])-c:1:c(:c(:c(:c(:c:1-[#1])-[#1])-[#1])-[#1])-[#7](-[#1])-[#6]-[#1]	PAINS
575	het_65_E(2)	s1c(c(c-2c1-[#7](-[#1])-[#6](-[#6](=[#6]-2-[#1])-[#6](=[#8])-[#8]-[#1])=[#8])-[#7](-[#1])-[#1])-[#6](=[#8])-[#7]-[#1]	PAINS
576	hzide_naphth(2)	c:2(:c:1:c(:c(:c(:c(:c:1:c(:c(:c:2-[#1])-[#1])-[#1])-[#1])-[#7](-[#1])-[#7](-[#1])-[#6]=[#8])-[#1])-[#1])-[#1]	PAINS
577	anisol_B(2)	[#6](-[#1])(-[#1])-c:1:c(:c(:c(:c(:c:1-[#8]-[#6](-[#1])-[#1])-[#1])-[#1])-[#6](-[#1])(-[#1])-[#7](-[#1])-[#6;X4])-[#1]	PAINS
578	thio_carbam_ene(2)	[#6]-1=[#6]-[#7]-[#6](-[#16]-[#6;X4]-1)=[#16]	PAINS
579	thio_amide_D(2)	[#6](-[#7](-[#6]-[#1])-[#6]-[#1]):[#6]-[#7](-[#1])-[#6](=[#16])-[#6]-[#1]	PAINS
580	het_65_Da(2)	n2nc(c1cccc1c2-[#6])-[#6]	PAINS
581	thiophene_D(2)	s:1:c(:c(-[#1]):c(:c:1-[#6](=[#8])-[#7](-[#1])-[#7]-[#1])-[#8]-[#6](-[#1])-[#1])-[#1]	PAINS
582	het_thio_6_ene(2)	[#6]-1:[#6]-[#7]=[#6]-[#6](=[#6]-[#7]-[#6])-[#16]-1	PAINS
583	cyano_keto_A(2)	[#6](-[#1])(-[#1])-[#6](-[#1])(-[#6]#[#7])-[#6](=[#8])-[#6]	PAINS
584	anthranil_acid_C(2)	c2(c(-[#7](-[#1])-[#1])n(-c:1:c:c:c:c:c:1-[#6](=[#8])-[#8]-[#1])nc2-[#6]=[#8])-[$([#6]#[#7]),$([#6]=[#16])]	PAINS
585	naphth_amino_C(2)	c:2:c:1:c:c:c:c-3:c:1:c(:c:c:2)-[#7](-[#7]=[#6]-3)-[#1]	PAINS
586	naphth_amino_D(2)	c:2:c:1:c:c:c:c-3:c:1:c(:c:c:2)-[#7]-[#7]=[#7]-3	PAINS
587	thiazole_amine_G(2)	c1csc(n1)-[#7]-[#7]-[#16](=[#8])=[#8]	PAINS
588	het_66_B(2)	c:1:c:c:c:2:c(:c:1):n:c(:n:c:2)-[#7](-[#1])-[#6]-3=[#7]-[#6](-[#6]=[#6]-[#7]-3-[#1])(-[#6](-[#1])-[#1])-[#6](-[#1])-[#1]	PAINS
589	coumarin_A(2)	c:1-3:c(:c(:c(:c(:c:1)-[#8]-[#6]-[#1])-[#1])-[#1])-c:2:c(:c(:c(:c(:c:2-[#1])-[#1])-[#8]-[#6](-[#1])-[#1])-[#1])-[#6](=[#8])-[#8]-3	PAINS
590	anthranil_acid_D(2)	c:12:c(:c:c:c:n:1)c(c(-[#6](=[#8])~[#8;X1])s2)-[#7](-[#1])-[#1]	PAINS
591	het_66_C(2)	c:1:2:n:c(:c(:n:c:1:[#6]:[#6]:[#6]:[!#1]:2)-[#6](-[#1])=[#6](-[#8]-[#1])-[#6])-[#6](-[#1])=[#6](-[#8]-[#1])-[#6]	PAINS
592	thiophene_amino_E(2)	c1csc(c1-[#7](-[#1])-[#1])-[#6](-[#1])=[#6](-[#1])-c2cccs2	PAINS
593	het_6666_A(2)	c:2:c:c:1:n:c:3:c(:n:c:1:c:c:2):c:c:c:4:c:3:c:c:c:c:4	PAINS
594	sulfonamide_E(2)	[#6]:[#6]-[#7](-[#1])-[#16](=[#8])(=[#8])-[#7](-[#1])-[#6]:[#6]	PAINS
595	anil_di_alk_K(2)	c:1:c:c(:c:c:c:1-[#7](-[#1])-[#1])-[#7](-[#6;X3])-[#6;X3]	PAINS
596	het_5_C(2)	[#7]-2=[#6](-c:1:c:c:c:c:c:1)-[#6](-[#1])(-[#1])-[#6](-[#8]-[#1])(-[#6](-[#9])(-[#9])-[#9])-[#7]-2-[$([#6]:[#6]:[#6]:[#6]:[#6]:[#6]),$([#6](=[#16])-[#6]:[#6]:[#6]:[#6]:[#6]:[#6])]	PAINS
597	ene_six_het_B(2)	c:1:c(:c:c:c:c:1)-[#6](=[#8])-[#6](-[#1])=[#6]-3-[#6](=[#8])-[#7](-[#1])-[#6](=[#8])-[#6](=[#6](-[#1])-c:2:c:c:c:c:c:2)-[#7]-3-[#1]	PAINS
598	steroid_A(2)	[#8]=[#6]-4-[#6]-[#6]-[#6]-3-[#6]-2-[#6](=[#8])-[#6]-[#6]-1-[#6]-[#6]-[#6]-[#6]-1-[#6]-2-[#6]-[#6]-[#6]-3=[#6]-4	PAINS
599	het_565_A(2)	c:1:2:c:3:c(:c(-[#8]-[#1]):c(:c:1:c(:c:n:2-[#6])-[#6]=[#8])-[#1]):n:c:n:3	PAINS
600	thio_imine_ium(2)	[#6;X4]-[#7+](-[#6;X4]-[#8]-[#1])=[#6]-[#16]-[#6]-[#1]	PAINS
601	anthranil_acid_E(2)	[#6]-3(=[#8])-[#6](=[#6](-[#1])-[#7](-[#1])-c:1:c:c:c:c:c:1-[#6](=[#8])-[#8]-[#1])-[#7]=[#6](-c:2:c:c:c:c:c:2)-[#8]-3	PAINS
602	hzone_furan_B(2)	c:1(:c(:c(:c(:o:1)-[$([#1]),$([#6](-[#1])-[#1])])-[#1])-[#1])-[#6](-[$([#1]),$([#6](-[#1])-[#1])])=[#7]-[#7](-[#1])-c:2:c:c:n:c:c:2	PAINS
603	thiophene_E(2)	c:1(:c(:c(:c(:s:1)-[$([#1]),$([#6](-[#1])-[#1])])-[#1])-[#1])-[#6](-[$([#1]),$([#6](-[#1])-[#1])])-[#6](=[#8])-[#7](-[#1])-c:2:n:c:c:s:2	PAINS
604	ene_misc_B(2)	[#6]:[#6]-[#6](-[#1])(-[#1])-[#6](-[#1])(-[#6]=[#8])-[#7]-2-[#6](=[#8])-[#6]-1(-[#1])-[#6](-[#1])(-[#1])-[#6]=[#6]-[#6](-[#1])(-[#1])-[#6]-1(-[#1])-[#6]-2=[#8]	PAINS
605	het_thio_5_B(2)	[#6]-1(-[#6]=[#8])(-[#6]:[#6])-[#16;X2]-[#6]=[#7]-[#7]-1-[#1]	PAINS
606	thiophene_amino_F(2)	[#7](-[#1])(-[#1])-c:1:c(:c(:c(:s:1)-[#7](-[#1])-[#6](=[#8])-c:2:c:c:c:c:c:2)-[#6]#[#7])-[#6]:3:[!#1]:[!#1]:[!#1]:[!#1]:[!#1]:3	PAINS
607	anil_OC_alk_D(2)	[#6](-[#1])(-[#1])-[#8]-c:1:c(:c(:c(:c(:c:1-[#1])-[#1])-[#6](-[#1])-[#1])-[#1])-[#7](-[#1])-[#6](-[#1])(-[#1])-c:2:c:c:c:c:c:2-[$([#6](-[#1])-[#1]),$([#8]-[#6](-[#1])-[#1])]	PAINS
608	tert_butyl_A(2)	[#6](-[#1])(-[#1])(-[#1])-[#6](-[#6](-[#1])(-[#1])-[#1])(-[#6](-[#1])(-[#1])-[#1])-c:1:c(:c:c(:c(:c:1-[#1])-[#6](-[#6](-[#1])(-[#1])-[#1])(-[#6](-[#1])(-[#1])-[#1])-[#6](-[#1])(-[#1])-[#1])-[#8]-[#6](-[#1])-[#7])-[#1]	PAINS
609	thio_urea_J(2)	c:1(:c(:o:c:c:1)-[#6]-[#1])-[#6]=[#7]-[#7](-[#1])-[#6](=[#16])-[#7]-[#1]	PAINS
610	het_thio_65_B(2)	[#7](-[#1])-c1nc(nc2nnc(n12)-[#16]-[#6])-[#7](-[#1])-[#6]	PAINS
611	coumarin_B(2)	c:1-2:c(:c:c:c:c:1-[#6](-[#1])(-[#1])-[#6](-[#1])=[#6](-[#1])-[#1])-[#6](=[#6](-[#6](=[#8])-[#7](-[#1])-[#6]:[#6])-[#6](=[#8])-[#8]-2)-[#1]	PAINS
612	thio_urea_K(2)	[#6]-2(=[#16])-[#7]-1-[#6]:[#6]-[#7]=[#7]-[#6]-1=[#7]-[#7]-2-[#1]	PAINS
613	thiophene_amino_G(2)	[#6]:[#6]:[#6]:[#6]:[#6]:[#6]-c:1:c:c(:c(:s:1)-[#7](-[#1])-[#6](=[#8])-[#6])-[#6](=[#8])-[#8]-[#1]	PAINS
614	anil_NH_alk_D(2)	[#7](-[#1])(-[#1])-c:1:c(:c(:c(:c:c:1-[#7](-[#1])-[#6](-[#1])(-[#6])-[#6](-[#1])-[#6](-[#1])-[#1])-[#1])-[#1])-[#1]	PAINS
615	het_thio_5_C(2)	[#16]=[#6]-2-[#7](-[#1])-[#7]=[#6](-c:1:c(:c(:c(:c(:c:1-[#1])-[#1])-[#8]-[#6](-[#1])-[#1])-[#1])-[#1])-[#8]-2	PAINS
616	thio_keto_het(2)	[#16]=[#6]-c:1:c:c:c:2:c:c:c:c:n:1:2	PAINS
617	het_thio_N_5B(2)	[#6]~1~[#6](~[#7]~[#7]~[#6](~[#6](-[#1])-[#1])~[#6](-[#1])-[#1])~[#7]~[#16]~[#6]~1	PAINS
618	quinone_D(2)	[#6]-1(-[#6]=:[#6]-[#6]=:[#6]-[#6]-1=[!#6&!#1])=[!#6&!#1]	PAINS
619	anil_di_alk_furan_B(2)	[#6](-[#1])(-[#1])-[#7](-[#6](-[#1])-[#1])-c:1:c(-[#1]):c(:c(:o:1)-[#6](-[#1])=[#6]-[#6]#[#7])-[#1]	PAINS
620	ene_six_het_C(2)	[#8]=[#6]-1-[#6]:[#6]-[#6](-[#1])(-[#1])-[#7]-[#6]-1=[#6]-[#1]	PAINS
621	het_55_A(2)	[#6]:[#6]-[#7]:2:[#7]:[#6]:1-[#6](-[#1])(-[#1])-[#16;X2]-[#6](-[#1])(-[#1])-[#6]:1-[#6]:2-[#7](-[#1])-[#6](=[#8])-[#6](-[#1])=[#6]-[#1]	PAINS
622	het_thio_65_C(2)	n:1:c(:n(:c:2:c:1:c:c:c:c:2)-[#6](-[#1])-[#1])-[#16]-[#6](-[#1])(-[#1])-[#6](=[#8])-[#7](-[#1])-[#7]=[#6](-[#1])-[#6](-[#1])=[#6]-[#1]	PAINS
623	hydroquin_A(2)	c:1(:c:c(:c(:c:c:1)-[#8]-[#1])-[#6](=!@[#6]-[#7])-[#6]=[#8])-[#8]-[#1]	PAINS
624	anthranil_acid_F(2)	c:1(:c:c(:c(:c:c:1)-[#7](-[#1])-[#6](=[#8])-[#6]:[#6])-[#6](=[#8])-[#8]-[#1])-[#8]-[#1]	PAINS
625	pyrrole_I(2)	n2(-[#6](-[#1])-[#1])c-1c(-[#6]:[#6]-[#6]-1=[#8])cc2-[#6](-[#1])-[#1]	PAINS
626	thiophene_amino_H(2)	[#6](-[#1])-[#7](-[#1])-c:1:c(:c(:c(:s:1)-[#6]-[#1])-[#6]-[#1])-[#6](=[#8])-[#7](-[#1])-[#6]:[#6]	PAINS
627	imine_one_fives_C(2)	[#6]:[#6]-[#7;!R]=[#6]-2-[#6](=[!#6&!#1])-c:1:c:c:c:c:c:1-[#7]-2	PAINS
628	keto_phenone_zone_A(2)	c:1:c:c:c:c:c:1-[#6](=[#8])-[#7](-[#1])-[#7]=[#6]-3-c:2:c:c:c:c:c:2-c:4:c:c:c:c:c-3:4	PAINS
629	dyes7A(2)	c:1:c(:c:c:c:c:1)-[#7](-[#6](-[#1])-[#1])-[#6](-[#1])=[#6](-[#1])-[#6]=!@[#6](-[#1])-[#6](-[#1])=[#6]-[#6]=@[#7]-c:2:c:c:c:c:c:2	PAINS
630	het_pyridiniums_B(2)	[#6]:1:2:[!#1]:[#7+](:[!#1]:[#6](:[!#1]:1:[#6]:[#6]:[#6]:[#6]:2)-[*])~[#6]:[#6]	PAINS
631	het_5_D(2)	[#7]-2(-c:1:c:c:c:c:c:1)-[#7]=[#6](-[#6](-[#1])-[#1])-[#6](-[#1])(-[#16]-[#6])-[#6]-2=[#8]	PAINS
632	thiazole_amine_H(1)	c:1:c:c:c(:c:c:1-[#7](-[#1])-c2nc(c(-[#1])s2)-c:3:c:c:c(:c:c:3)-[#6](-[#1])(-[#6]-[#1])-[#6]-[#1])-[#6](=[#8])-[#8]-[#1]	PAINS
633	thiazole_amine_I(1)	[#6](-[#1])(-[#1])-[#7](-[#1])-[#6]=[#7]-[#7](-[#1])-c1nc(c(-[#1])s1)-[#6]:[#6]	PAINS
634	het_thio_N_5C(1)	[#6]:[#6]-[#7](-[#1])-[#6](=[#8])-c1c(snn1)-[#7](-[#1])-[#6]:[#6]	PAINS
635	sulfonamide_F(1)	[#8]=[#16](=[#8])(-[#6]:[#6])-[#7](-[#1])-c1nc(cs1)-[#6]:[#6]	PAINS
636	thiazole_amine_J(1)	[#8]=[#16](=[#8])(-[#6]:[#6])-[#7](-[#1])-[#7](-[#1])-c1nc(cs1)-[#6]:[#6]	PAINS
637	het_65_F(1)	s2c:1:n:c:n:c(:c:1c(c2-[#6](-[#1])-[#1])-[#6](-[#1])-[#1])-[#7]-[#7]=[#6]-c3ccco3	PAINS
638	keto_keto_beta_E(1)	[#6](=[#8])-[#6](-[#1])=[#6](-[#8]-[#1])-[#6](-[#8]-[#1])=[#6](-[#1])-[#6](=[#8])-[#6]	PAINS
639	ene_five_one_B(1)	c:2(:c:1-[#6](-[#6](-[#6](-c:1:c(:c(:c:2-[#1])-[#1])-[#1])(-[#1])-[#1])=[#8])=[#6](-[#6](-[#1])-[#1])-[#6](-[#1])-[#1])-[#1]	PAINS
640	keto_keto_beta_zone(1)	[#6]:[#6]-[#7](-[#1])-[#7]=[#6](-[#6](-[#1])-[#1])-[#6](-[#1])(-[#1])-[#6](-[#6](-[#1])-[#1])=[#7]-[#7](-[#1])-[#6]:[#6]	PAINS
641	thio_urea_L(1)	[#6;X4]-[#16;X2]-[#6](=[#7]-[!#1]:[!#1]:[!#1]:[!#1])-[#7](-[#1])-[#7]=[#6]	PAINS
642	het_thio_urea_ene(1)	[#6]-1(=[#7]-[#7](-[#6](-[#16]-1)=[#6](-[#1])-[#6]:[#6])-[#6]:[#6])-[#6]=[#8]	PAINS
643	cyano_amino_het_A(1)	c:1(:c(:c:2:c(:n:c:1-[#7](-[#1])-[#1]):c:c:c(:c:2-[#7](-[#1])-[#1])-[#6]#[#7])-[#6]#[#7])-[#6]#[#7]	PAINS
644	tetrazole_hzide(1)	[!#1]:1:[!#1]:[!#1]:[!#1](:[!#1]:[!#1]:1)-[#6](-[#1])=[#6](-[#1])-[#6](-[#7](-[#1])-[#7](-[#1])-c2nnnn2-[#6])=[#8]	PAINS
645	imine_naphthol_A(1)	c:1:2:c(:c(:c(:c(:c:1:c(:c(:c(:c:2-[#1])-[#1])-[#6](=[#7]-[#6]:[#6])-[#6](-[#1])-[#1])-[#8]-[#1])-[#1])-[#1])-[#1])-[#1]	PAINS
646	misc_anisole_A(1)	c:1(:c(:c:2:c(:c(:c:1-[#8]-[#6](-[#1])-[#1])-[#1]):c(:c(:c(:c:2-[#7](-[#1])-[#6](-[#1])(-[#1])-[#1])-[#1])-c:3:c(:c(:c(:c(:c:3-[#1])-[#1])-[#8]-[#6](-[#1])-[#1])-[#8]-[#6](-[#1])-[#1])-[#1])-[#1])-[#1])-[#8]-[#6](-[#1])-[#1]	PAINS
647	het_thio_665(1)	c:1:c:c-2:c(:c:c:1)-[#16]-c3c(-[#7]-2)cc(s3)-[#6](-[#1])-[#1]	PAINS
648	anil_di_alk_L(1)	c:1:c:c:c-2:c(:c:1)-[#6](-[#6](-[#7]-2-[#6](-[#1])(-[#1])-[#6](-[#1])(-[#1])-[#7]-4-[#6](-c:3:c:c:c:c:c:3-[#6]-4=[#8])=[#8])(-[#1])-[#1])(-[#1])-[#1]	PAINS
649	colchicine_B(1)	c:1(:c:c:c(:c:c:1)-[#6]-3=[#6]-[#6](-c2cocc2-[#6](=[#6]-3)-[#8]-[#1])=[#8])-[#16]-[#6](-[#1])-[#1]	PAINS
650	misc_aminoacid_A(1)	[#6;X4]-c:1:c(:c(:c(:c(:c:1-[#1])-[#1])-[#6](=[#8])-[#7](-[#1])-[#6](-[#1])(-[#6](-[#1])(-[#1])-[#6](-[#1])(-[#1])-[#16]-[#6](-[#1])(-[#1])-[#1])-[#6](=[#8])-[#8]-[#1])-[#1])-[#1]	PAINS
651	imidazole_amino_A(1)	n:1:c(:n(:c(:c:1-c:2:c:c:c:c:c:2)-c:3:c:c:c:c:c:3)-[#7]=!@[#6])-[#7](-[#1])-[#1]	PAINS
652	phenol_sulfite_A(1)	[#6](-c:1:c:c:c(:c:c:1)-[#8]-[#1])(-c:2:c:c:c(:c:c:2)-[#8]-[#1])-[#8]-[#16](=[#8])=[#8]	PAINS
653	het_66_D(1)	c:2:c:c:1:n:c(:c(:n:c:1:c:c:2)-[#6](-[#1])(-[#1])-[#6](=[#8])-[#6]:[#6])-[#6](-[#1])(-[#1])-[#6](=[#8])-[#6]:[#6]	PAINS
654	misc_anisole_B(1)	c:1(:c(:c(:c(:c(:c:1-[#1])-[#8]-[#6](-[#1])-[#1])-[#8]-[#6](-[#1])-[#1])-[#1])-[#1])-[#6](=[#8])-[#6](-[#1])(-[#1])-[#7](-[#6](-[#1])-[#1])-c:2:c:c:c(-[#6](-[#1])-[#1])c:c:2	PAINS
655	tetrazole_A(1)	[#6](-[#1])(-[#1])-c1nnnn1-c:2:c(:c(:c(:c(:c:2-[#1])-[#1])-[#8]-[#6](-[#1])(-[#1])-[#1])-[#1])-[#1]	PAINS
656	het_65_G(1)	[#6]-2(=[#7]-c1c(c(nn1-[#6](-[#6]-2(-[#1])-[#1])=[#8])-[#7](-[#1])-[#1])-[#7](-[#1])-[#1])-[#6]	PAINS
657	misc_trityl_A(1)	[#6](-[#6]:[#6])(-[#6]:[#6])(-[#6]:[#6])-[#16]-[#6]:[#6]-[#6](=[#8])-[#8]-[#1]	PAINS
658	misc_pyridine_OC(1)	[#8]=[#6](-c:1:c(:c(:n:c(:c:1-[#1])-[#8]-[#6](-[#1])(-[#1])-[#1])-[#8]-[#6](-[#1])(-[#1])-[#1])-[#1])-[#7](-[#1])-[#6](-[#1])(-[#6](-[#1])-[#1])-[#6](-[#1])-[#1]	PAINS
659	het_6_hydropyridone(1)	[#7]-1=[#6](-[#7](-[#6](-[#6](-[#6]-1(-[#1])-[#6]:[#6])(-[#1])-[#1])=[#8])-[#1])-[#7]-[#1]	PAINS
660	misc_stilbene(1)	[#6]-1(=[#6](-[#6](-[#6](-[#6](-[#6]-1(-[#1])-[#1])(-[#1])-[#6](=[#8])-[#6])(-[#1])-[#6](=[#8])-[#8]-[#1])(-[#1])-[#1])-[#6]:[#6])-[#6]:[#6]	PAINS
661	misc_imidazole(1)	[#6](-[#1])(-c:1:c(:c(:c(:c(:c:1-[#1])-[#1])-[Cl])-[#1])-[#1])(-c:2:c(:c(:c(:c(:c:2-[#1])-[#1])-[Cl])-[#1])-[#1])-[#8]-[#6](-[#1])(-[#1])-[#6](-[#1])(-[#1])-[#6](-[#1])(-[#1])-c3nc(c(n3-[#6](-[#1])(-[#1])-[#1])-[#1])-[#1]	PAINS
662	anil_NH_no_alk_A(1)	n:1:c(:c(:c(:c(:c:1-[#1])-[#7](-[#1])-[#1])-[#1])-[#1])-[#7](-[#1])-[#6]:[#6]	PAINS
663	het_6_imidate_B(1)	[#7](-[#1])(-c:1:c(:c(:c(:c(:c:1-[#1])-[#1])-[#1])-[#1])-[#8]-[#1])-[#6]-2=[#6](-[#8]-[#6](-[#7]=[#7]-2)=[#7])-[#7](-[#1])-[#1]	PAINS
664	anil_alk_B(1)	[#7](-[#1])(-c:1:c(:c(:c(:c(:c:1-[#1])-[#1])-[#6](-[#1])-[#1])-[#1])-[#1])-[#6](-[#1])(-[#1])-[#6](-[#1])(-[#1])-c:2:c(:c(:c(:c(:c:2-[#1])-[#1])-[#8]-[#6](-[#1])-[#1])-[#1])-[#1]	PAINS
665	styrene_anil_A(1)	c:1:c:c-3:c(:c:c:1)-c:2:c:c:c(:c:c:2-[#6]-3=[#6](-[#1])-[#6])-[#7](-[#1])-[#1]	PAINS
666	misc_aminal_acid(1)	c:1:c:c-2:c(:c:c:1)-[#7](-[#6](-[#8]-[#6]-2)(-[#6](=[#8])-[#8]-[#1])-[#6](-[#1])-[#1])-[#6](=[#8])-[#6](-[#1])-[#1]	PAINS
667	anil_no_alk_D(1)	n:1:c(:c(:c(:c(:c:1-[#7](-[#1])-[#1])-[#6](-[#1])-[#1])-[#1])-[#6](-[#1])-[#1])-[#7](-[#1])-[#1]	PAINS
668	anil_alk_C(1)	[#7](-[#1])(-c:1:c:c:c:c:c:1)-[#6](-[#6])(-[#6])-c:2:c(:c(:c(:c(:c:2-[#1])-[#1])-[#8]-[#6](-[#1])-[#1])-[#1])-[#1]	PAINS
669	misc_anisole_C(1)	[#7](-[#1])(-c:1:c(:c(:c(:c(:c:1-[#1])-[#1])-[#8]-[#6](-[#1])(-[#1])-[#1])-[#8]-[#6]-[#1])-[#1])-[#6](=[#8])-[#7](-[#1])-[#6](-[#1])(-[#1])-[#6](-[#1])(-[#1])-[#6](-[#1])(-[#1])-[#7](-[#6](-[#1])(-[#1])-[#1])-[#6]:[#6]	PAINS
670	het_465_misc(1)	c:1-2:c:c-3:c(:c:c:1-[#8]-[#6]-[#8]-2)-[#6]-[#6]-3	PAINS
671	anthranil_acid_G(1)	c:1(:c(:c(:c(:c(:c:1-[#1])-[#1])-[#8]-[#6](-[#1])-[#1])-[#1])-[#6](=[#8])-[#8]-[#1])-[#7](-[#1])-[#6]:[#6]	PAINS
672	anil_di_alk_M(1)	c:1(:c:4:c(:n:c(:c:1-[#6](-[#1])(-[#1])-[#7]-3-c:2:c(:c(:c(:c(:c:2-[#6](-[#1])(-[#1])-[#6]-3(-[#1])-[#1])-[#1])-[#1])-[#1])-[#1])-[#1]):c(:c(:c(:c:4-[#1])-[#1])-[#1])-[#1])-[#1]	PAINS
673	anthranil_acid_H(1)	c:1:c(:c2:c(:c:c:1)c(c(n2-[#1])-[#6]:[#6])-[#6]:[#6])-[#6](=[#8])-[#8]-[#1]	PAINS
674	thio_urea_M(1)	[#6]:[#6]-[#7](-[#6](-[#1])-[#1])-[#6](-[#1])(-[#1])-[#6](-[#1])(-[#1])-[#6](-[#1])(-[#1])-[#7](-[#1])-[#6](=[#16])-[#7](-[#1])-c:1:c(:c(:c(:c(:c:1-[F,Cl,Br,I])-[#1])-[#6](-[#1])-[#1])-[#1])-[#1]	PAINS
675	thiazole_amine_K(1)	n:1:c3:c(:c:c2:c:1nc(s2)-[#7])sc(n3)-[#7]	PAINS
676	het_thio_5_imine_A(1)	[#7]=[#6]-1-[#16]-[#6](=[#7])-[#7]=[#6]-1	PAINS
677	thio_amide_E(1)	c:1:c(:n:c:c:c:1)-[#6](=[#16])-[#7](-[#1])-c:2:c(:c:c:c:c:2)-[#8]-[#6](-[#1])-[#1]	PAINS
678	het_thio_676_B(1)	c:1-2:c(:c(:c(:c(:c:1-[#6](-c:3:c(-[#16]-[#6]-2(-[#1])-[#1]):c(:c(-[#1]):c(:c:3-[#1])-[#1])-[#1])-[#8]-[#6]:[#6])-[#1])-[#1])-[#1])-[#1]	PAINS
679	sulfonamide_G(1)	[#6](-[#1])(-[#1])(-[#1])-c:1:c(:c(:c(:c(:n:1)-[#7](-[#1])-[#16](-c:2:c(:c(:c(:c(:c:2-[#1])-[#1])-[#8]-[#6](-[#1])(-[#1])-[#6](-[#1])(-[#1])-[#6](-[#1])-[#1])-[#1])-[#1])(=[#8])=[#8])-[#1])-[#1])-[#1]	PAINS
680	thio_thiomorph_Z(1)	[#6](=[#8])(-[#7]-1-[#6]-[#6]-[#16]-[#6]-[#6]-1)-c:2:c(:c(:c(:c(:c:2-[#16]-[#6](-[#1])-[#1])-[#1])-[#1])-[#1])-[#1]	PAINS
681	naphth_ene_one_A(1)	c:1:c:c:3:c:2:c(:c:1)-[#6](-[#6]=[#6](-c:2:c:c:c:3)-[#8]-[#6](-[#1])-[#1])=[#8]	PAINS
682	naphth_ene_one_B(1)	c:1-3:c:2:c(:c(:c:c:1)-[#7]):c:c:c:c:2-[#6](-[#6]=[#6]-3-[#6](-[F])(-[F])-[F])=[#8]	PAINS
683	amino_acridine_A(1)	c:1:c:c:c:c:2:c:1:c:c:3:c(:n:2):n:c:4:c(:c:3-[#7]):c:c:c:c:4	PAINS
684	keto_phenone_B(1)	c:1:c-3:c(:c:c:c:1)-[#6]-2=[#7]-[!#1]=[#6]-[#6]-[#6]-2-[#6]-3=[#8]	PAINS
685	hzone_acid_A(1)	c:1-3:c(:c(:c(:c(:c:1-[#1])-[#1])-[#8]-[#6](-[#1])-[#1])-[#1])-[#6](=[#7]-[#7](-[#1])-c:2:c(:c(:c(:c(:c:2-[#1])-[#1])-[#6](=[#8])-[#8]-[#1])-[#1])-[#1])-c:4:c-3:c(:c(:c(:c:4-[#1])-[#8]-[#6](-[#1])-[#1])-[#1])-[#1]	PAINS
686	sulfonamide_H(1)	c:1(:c(:c(:c(:c(:c:1-[#1])-[#1])-[#7](-[#1])-[#1])-[#1])-[#1])-[#16](=[#8])(=[#8])-[#7](-[#1])-c:2:n:n:c(:c(:c:2-[#1])-[#1])-[#1]	PAINS
687	het_565_indole(1)	c2(c(-[#1])n(-[#6](-[#1])-[#1])c:3:c(:c(:c:1n(c(c(c:1:c2:3)-[#1])-[#1])-[#6](-[#1])-[#1])-[#8]-[#6](-[#1])-[#1])-[#8]-[#6](-[#1])-[#1])-[#1]	PAINS
688	pyrrole_J(1)	c1(c-2c(c(n1-[#6](-[#8])=[#8])-[#6](-[#1])-[#1])-[#16]-[#6](-[#1])(-[#1])-[#16]-2)-[#6](-[#1])-[#1]	PAINS
689	pyrazole_amino_B(1)	s1ccnc1-c2c(n(nc2-[#1])-[#1])-[#7](-[#1])-[#1]	PAINS
690	pyrrole_K(1)	c1(c(c(c(n1-[#1])-c:2:c(:c(:c(:c(:c:2-[#1])-[#1])-[#1])-[#1])-[#1])-[#6](-[#1])-[#1])-[#1])-[#6](=[#8])-[#8]-[#1]	PAINS
691	anthranil_acid_I(1)	c:1:2(:c(:c(:c(:o:1)-[#6])-[#1])-[#1])-[#6](=[#8])-[#7](-[#1])-[#6]:[#6](-[#1]):[#6](-[#1]):[#6](-[#1]):[#6](-[#1]):[#6]:2-[#6](=[#8])-[#8]-[#1]	PAINS
692	thio_amide_F(1)	[!#1]:[#6]-[#6](=[#16])-[#7](-[#1])-[#7](-[#1])-[#6]:[!#1]	PAINS
693	ene_one_C(1)	[#6]-1(=[#8])-[#6](-[#6](-[#6]#[#7])=[#6](-[#1])-[#7])-[#6](-[#7])-[#6]=[#6]-1	PAINS
694	het_65_H(1)	c2(c-1n(-[#6](-[#6]=[#6]-[#7]-1)=[#8])nc2-c3cccn3)-[#6]#[#7]	PAINS
695	cyano_imine_D(1)	[#8]=[#6]-1-[#6](=[#7]-[#7]-[#6]-[#6]-1)-[#6]#[#7]	PAINS
696	cyano_misc_A(1)	c:2(:c:1:c:c:c:c:c:1:n:n:c:2)-[#6](-[#6]:[#6])-[#6]#[#7]	PAINS
697	ene_misc_C(1)	c:1:c:c-2:c(:c:c:1)-[#6]=[#6]-[#6](-[#7]-2-[#6](=[#8])-[#7](-[#1])-c:3:c:c(:c(:c:c:3)-[#8]-[#6](-[#1])-[#1])-[#8]-[#6](-[#1])-[#1])(-[#6](-[#1])-[#1])-[#6](-[#1])-[#1]	PAINS
698	het_66_E(1)	c:2:c:c:1:n:c(:c(:n:c:1:c:c:2)-c:3:c:c:c:c:c:3)-c:4:c:c:c:c:c:4-[#8]-[#1]	PAINS
699	keto_keto_beta_F(1)	[#6](-[#1])(-[#1])-[#6](-[#8]-[#1])=[#6](-[#6](=[#8])-[#6](-[#1])-[#1])-[#6](-[#1])-[#6]#[#6]	PAINS
700	misc_naphthimidazole(1)	c:1:c:4:c(:c:c2:c:1nc(n2-[#1])-[#6]-[#8]-[#6](=[#8])-c:3:c:c(:c:c(:c:3)-[#7](-[#1])-[#1])-[#7](-[#1])-[#1]):c:c:c:c:4	PAINS
701	naphth_ene_one_C(1)	c:2(:c:1:c:c:c:c-3:c:1:c(:c:c:2)-[#6]=[#6]-[#6]-3=[#7])-[#7]	PAINS
702	keto_phenone_C(1)	c:2(:c:1:c:c:c:c:c:1:c-3:c(:c:2)-[#6](-c:4:c:c:c:c:c-3:4)=[#8])-[#8]-[#1]	PAINS
703	coumarin_C(1)	[#6]-2(-[#6]=[#7]-c:1:c:c(:c:c:c:1-[#8]-2)-[Cl])=[#8]	PAINS
704	thio_est_cyano_A(1)	[#6]-1=[#6]-[#7](-[#6](-c:2:c-1:c:c:c:c:2)(-[#6]#[#7])-[#6](=[#16])-[#16])-[#6]=[#8]	PAINS
705	het_65_imidazole(1)	c2(nc:1:c(:c(:c(:c(:c:1-[#1])-[#1])-[#1])-[#1])n2-[#6])-[#7](-[#1])-[#6](-[#7](-[#1])-c:3:c(:c:c:c:c:3-[#1])-[#1])=[#8]	PAINS
706	anthranil_acid_J(1)	[#7](-[#1])(-[#6]:[#6])-c:1:c(-[#6](=[#8])-[#8]-[#1]):c:c:c(:n:1)-[#6]:[#6]	PAINS
707	colchicine_het(1)	c:1-3:c(:c:c:c:c:1)-[#16]-[#6](=[#7]-[#7]=[#6]-2-[#6]=[#6]-[#6]=[#6]-[#6]=[#6]-2)-[#7]-3-[#6](-[#1])-[#1]	PAINS
708	ene_misc_D(1)	c:1-2:c(:c(:c(:c(:c:1-[#1])-[#8]-[#6](-[#1])-[#1])-[#8]-[#6](-[#1])-[#1])-[#1])-[#6](=[#6](-[#6])-[#16]-[#6]-2(-[#1])-[#1])-[#6]	PAINS
709	indole_3yl_alk_B(1)	c:12:c(:c(:c(:c(:c:1-[#1])-[#1])-[#1])-[#1])c(c(-[#6]:[#6])n2-!@[#6]:[#6])-[#6](-[#1])-[#1]	PAINS
710	anil_OH_no_alk_A(1)	[#7](-[#1])(-[#1])-c:1:c:c:c(:c:c:1-[#8]-[#1])-[#16](=[#8])(=[#8])-[#8]-[#1]	PAINS
711	thiazole_amine_L(1)	s:1:c:c:c(:c:1-[#1])-c:2:c:s:c(:n:2)-[#7](-[#1])-[#1]	PAINS
712	pyrazole_amino_A(1)	c1c(-[#7](-[#1])-[#1])nnc1-c2c(-[#6](-[#1])-[#1])oc(c2-[#1])-[#1]	PAINS
713	het_thio_N_5D(1)	n1nscc1-c2nc(no2)-[#6]:[#6]	PAINS
714	anil_alk_indane(1)	c:1(:c:c-3:c(:c:c:1)-[#7]-[#6]-4-c:2:c:c:c:c:c:2-[#6]-[#6]-3-4)-[#6;X4]	PAINS
715	anil_di_alk_N(1)	c:1-2:c(:c(:c(:c(:c:1-[#1])-[#1])-[#1])-[#1])-[#6](=[#6](-[#1])-[#6]-3-[#6](-[#6]#[#7])-[#6](-[#1])(-[#1])-[#6](-[#1])-[#7]-2-3)-[#1]	PAINS
716	het_666_C(1)	c:2-3:c(:c:c:1:c:c:c:c:c:1:c:2)-[#7](-[#6](-[#1])-[#1])-[#6](=[#8])-[#6](=[#7]-3)-[#6]:[#6]-[#7](-[#1])-[#6](-[#1])-[#1]	PAINS
717	ene_one_D(1)	[#6](-[#8]-[#1]):[#6]-[#6](=[#8])-[#6](-[#1])=[#6](-[#6])-[#6]	PAINS
718	anil_di_alk_indol(1)	c:1:2:c(:c(:c(:c(:c:1-[#1])-[#1])-[#7](-[#6](-[#1])-[#1])-[#6](-[#1])-[#1])-[#1]):c(:c(-[#1]):n:2-[#1])-[#16](=[#8])=[#8]	PAINS
719	anil_no_alk_indol_A(1)	c:1:2:c(:c(:c(:c(:c:1-[#1])-[#1])-[#7](-[#1])-[#1])-[#1]):c(:c(-[#1]):n:2-[#6](-[#1])-[#1])-[#1]	PAINS
720	dhp_amino_CN_G(1)	[#16;X2]-1-[#6]=[#6](-[#6]#[#7])-[#6](-[#6])(-[#6]=[#8])-[#6](=[#6]-1-[#7](-[#1])-[#1])-[$([#6]=[#8]),$([#6]#[#7])]	PAINS
721	anil_di_alk_dhp(1)	[#7]-2-[#6]=[#6](-[#6]=[#8])-[#6](-c:1:c:c:c(:c:c:1)-[#7](-[#6](-[#1])-[#1])-[#6](-[#1])-[#1])-[#6]~3=[#6]-2~[#7]~[#6](~[#16])~[#7]~[#6]~3~[#7]	PAINS
722	anthranil_amide_A(1)	c:1:c(:c:c:c:c:1)-[#6](=[#8])-[#7](-[#1])-c:2:c(:c:c:c:c:2)-[#6](=[#8])-[#7](-[#1])-[#7](-[#1])-c:3:n:c:c:s:3	PAINS
723	hzone_anthran_Z(1)	c:1:c:2:c(:c:c:c:1):c(:c:3:c(:c:2):c:c:c:c:3)-[#6]=[#7]-[#7](-[#1])-c:4:c:c:c:c:c:4	PAINS
724	ene_one_amide_A(1)	c:1:c(:c:c:c:c:1)-[#6](-[#1])-[#7]-[#6](=[#8])-[#6](-[#7](-[#1])-[#6](-[#1])-[#1])=[#6](-[#1])-[#6](=[#8])-c:2:c:c:c(:c:c:2)-[#8]-[#6](-[#1])-[#1]	PAINS
725	het_76_A(1)	s:1:c(:c(-[#1]):c(:c:1-[#6]-3=[#7]-c:2:c:c:c:c:c:2-[#6](=[#7]-[#7]-3-[#1])-c:4:c:c:n:c:c:4)-[#1])-[#1]	PAINS
726	thio_urea_N(1)	o:1:c(:c(-[#1]):c(:c:1-[#6](-[#1])(-[#1])-[#7](-[#1])-[#6](=[#16])-[#7](-[#6]-[#1])-[#6](-[#1])(-[#1])-c:2:c:c:c:c:c:2)-[#1])-[#1]	PAINS
727	anil_di_alk_coum(1)	c:1:c(:c:c:c:c:1)-[#7](-[#6]-[#1])-[#6](-[#1])-[#6](-[#1])-[#6](-[#1])-[#7](-[#1])-[#6](=[#8])-[#6]-2=[#6](-[#8]-[#6](-[#6](=[#6]-2-[#6](-[#1])-[#1])-[#1])=[#8])-[#6](-[#1])-[#1]	PAINS
728	ene_one_amide_B(1)	c2-3:c:c:c:1:c:c:c:c:c:1:c2-[#6](-[#1])-[#6;X4]-[#7]-[#6]-3=[#6](-[#1])-[#6](=[#8])-[#7](-[#6](-[#1])-[#1])-[#6](-[#1])-[#1]	PAINS
729	het_thio_656c(1)	c:1:c(:c:c:c:c:1)-[#6]-4=[#7]-[#7]:2:[#6](:[#7+]:c:3:c:2:c:c:c:c:3)-[#16]-[#6;X4]-4	PAINS
730	het_5_ene(1)	[#6]-2(=[#8])-[#6](=[#6](-[#6](-[#1])-[#1])-[#7](-[#1])-[#6](-[#1])(-[#1])-[#6](-[#1])(-[#1])-[#6](-[#1])-[#1])-[#7]=[#6](-c:1:c:c:c:c:c:1)-[#8]-2	PAINS
731	thio_imide_A(1)	c:1:c(:c:c:c:c:1)-[#7]-2-[#6](=[#8])-[#6](=[#6](-[#1])-[#6]-2=[#8])-[#16]-c:3:c:c:c:c:c:3	PAINS
732	dhp_amidine_A(1)	[#7]-1(-[#1])-[#7]=[#6](-[#7]-[#1])-[#16]-[#6](=[#6]-1-[#6]:[#6])-[#6]:[#6]	PAINS
733	thio_urea_O(1)	c:1(:c(:c-3:c(:c(:c:1-[#7](-[#1])-[#6](=[#16])-[#7](-[#1])-[#6](-[#1])-c:2:c(:c(:c(:o:2)-[#6]-[#1])-[#1])-[#1])-[#1])-[#8]-[#6](-[#8]-3)(-[#1])-[#1])-[#1])-[#1]	PAINS
734	anil_di_alk_O(1)	c:1(:c(:c(:c(:c(:c:1-[#7](-[#1])-[#6](=[#16])-[#7](-[#1])-c:2:c:c:c:c:c:2)-[#1])-[#7](-[#6](-[#1])-[#1])-[#6](-[#1])-[#1])-[#1])-[#1])-[#1]	PAINS
735	thio_urea_P(1)	[#8]=[#6]-!@n:1:c:c:c-2:c:1-[#7](-[#1])-[#6](=[#16])-[#7]-2-[#1]	PAINS
736	het_pyraz_misc(1)	[#6](-[F])(-[F])-[#6](=[#8])-[#7](-[#1])-c:1:c(-[#1]):n(-[#6](-[#1])(-[#1])-[#6](-[#1])(-[#1])-[#8]-[#6](-[#1])(-[#1])-[#6]:[#6]):n:c:1-[#1]	PAINS
737	diazox_C(1)	[#7]-2=[#7]-[#6]:1:[#7]:[!#6&!#1]:[#7]:[#6]:1-[#7]=[#7]-[#6]:[#6]-2	PAINS
738	diazox_D(1)	[#6]-2(-[#1])(-[#8]-[#1])-[#6]:1:[#7]:[!#6&!#1]:[#7]:[#6]:1-[#6](-[#1])(-[#8]-[#1])-[#6]=[#6]-2	PAINS
739	misc_cyclopropane(1)	[#6]-1(-[#6](-[#1])(-[#1])-[#6]-1(-[#1])-[#1])(-[#6](=[#8])-[#7](-[#1])-c:2:c:c:c(:c:c:2)-[#8]-[#6](-[#1])(-[#1])-[#8])-[#16](=[#8])(=[#8])-[#6]:[#6]	PAINS
740	imine_ene_one_B(1)	[#6]-1:[#6]-[#6](=[#8])-[#6]=[#6]-1-[#7]=[#6](-[#1])-[#7](-[#6;X4])-[#6;X4]	PAINS
741	coumarin_D(1)	c:1:c:c(:c:c-2:c:1-[#6](=[#6](-[#1])-[#6](=[#8])-[#8]-2)-c:3:c:c:c:c:c:3)-[#8]-[#6](-[#1])(-[#1])-[#6]:[#8]:[#6]	PAINS
742	misc_furan_A(1)	c:1:c(:o:c(:c:1-[#6](-[#1])-[#1])-[#6](-[#1])-[#1])-[#6](-[#1])(-[#1])-[#7]-[#6](-[#1])(-[#1])-[#6](-[#1])(-[#8]-[#6](-[#1])-[#1])-[#6](-[#1])(-[#1])-[#8]-c:2:c:c-3:c(:c:c:2)-[#8]-[#6](-[#8]-3)(-[#1])-[#1]	PAINS
743	rhod_sat_E(1)	[#7]-4(-c:1:c:c:c:c:c:1)-[#6](=[#8])-[#16]-[#6](-[#1])(-[#7](-[#1])-c:2:c:c:c:c:3:c:c:c:c:c:2:3)-[#6]-4=[#8]	PAINS
744	rhod_sat_imine_A(1)	[#7]-3(-[#6](=[#8])-c:1:c:c:c:c:c:1)-[#6](=[#7]-c:2:c:c:c:c:c:2)-[#16]-[#6](-[#1])(-[#1])-[#6]-3=[#8]	PAINS
745	rhod_sat_F(1)	[#7]-2(-c:1:c:c:c:c:c:1)-[#6](=[#8])-[#16]-[#6](-[#1])(-[#1])-[#6]-2=[#16]	PAINS
746	het_thio_5_imine_B(1)	[#7]-1(-[#6](-[#1])-[#1])-[#6](=[#16])-[#7](-[#6]:[#6])-[#6](=[#7]-[#6]:[#6])-[#6]-1=[#7]-[#6]:[#6]	PAINS
747	het_thio_5_imine_C(1)	[#16]-1-[#6](=[#7]-[#7]-[#1])-[#16]-[#6](=[#7]-[#6]:[#6])-[#6]-1=[#7]-[#6]:[#6]	PAINS
748	ene_five_het_N(1)	[#6]-2(=[#8])-[#6](=[#6](-[#1])-c:1:c(:c:c:c(:c:1)-[F,Cl,Br,I])-[#8]-[#6](-[#1])-[#1])-[#7]=[#6](-[#16]-[#6](-[#1])-[#1])-[#16]-2	PAINS
749	thio_carbam_A(1)	[#6](-[#1])(-[#1])-[#16]-[#6](=[#16])-[#7](-[#1])-[#6](-[#1])(-[#1])-[#6]:[#6]	PAINS
750	misc_anilide_A(1)	c:1(:c(:c(:c(:c(:c:1-[#1])-[#1])-[#6](-[#1])-[#1])-[#7](-[#1])-[#6](=[#8])-[#6](-[#1])(-[#1])-[#6](-[#1])(-[#1])-[#6]:[#6])-[#1])-[#7](-[#1])-[#6](=[#8])-[#6](-[#1])(-[#1])-[#6](-[#1])(-[#1])-[#6]:[#6]	PAINS
751	misc_anilide_B(1)	c:1(:c(:c:c(:c:c:1-[#6])-[Br])-[#6])-[#7](-[#1])-[#6](=[#8])-[#7](-[#1])-[#6]-[#6]-[#6]	PAINS
752	mannich_B(1)	c:1-2:c(:c:c:c(:c:1-[#8]-[#6](-[#1])(-[#1])-[#7](-[#6]:[#6]-[#8]-[#6](-[#1])-[#1])-[#6]-2(-[#1])-[#1])-[#1])-[#1]	PAINS
753	mannich_catechol_A(1)	c:1-2:c(:c(:c(:c(:c:1-[#8]-[#6](-[#1])(-[#1])-[#7](-[#6](-[#1])-[#1])-[#6]-2(-[#1])-[#1])-[#1])-[#8])-[#8])-[#1]	PAINS
754	anil_alk_D(1)	[#7](-[#1])(-c:1:c(:c(:c(:c(:c:1-[#1])-[#1])-[#6](-[#1])(-[#6](-[#1])-[#1])-[#6](-[#1])-[#1])-[#1])-[#1])-[#6](-[#1])(-[#1])-[#6](-[#1])(-[#1])-[#7](-[#6](-[#1])-[#1])-[#6](-[#1])-[#1]	PAINS
755	het_65_I(1)	n:1:2:c:c:c(:c:c:1:c:c(:c:2-[#6](=[#8])-[#6]:[#6])-[#6]:[#6])-[#6](~[#8])~[#8]	PAINS
756	misc_urea_A(1)	c:1(:c(:c(:c(:c(:c:1-[#1])-[#1])-[#1])-[#6](=[#6](-[#1])-[#1])-[#6](-[#1])-[#1])-[#1])-[#6](-[#6;X4])(-[#6;X4])-[#7](-[#1])-[#6](=[#8])-[#7](-[#6](-[#1])(-[#1])-[#6](-[#1])-[#1])-[#6](-[#1])(-[#1])-[#6](-[#1])(-[#1])-[#6](-[#1])-[#6](-[#1])(-[#1])-[#6]:[#6]	PAINS
757	imidazole_C(1)	[#6]-3(-[#1])(-n:1:c(:n:c(:c:1-[#1])-[#1])-[#1])-c:2:c(:c(:c(:c(:c:2-[#1])-[Br])-[#1])-[#1])-[#6](-[#1])(-[#1])-[#6](-[#1])(-[#1])-c:4:c-3:c(:c(:c(:c:4-[#1])-[#1])-[#1])-[#1]	PAINS
758	styrene_imidazole_A(1)	[#6](=[#6](-[#1])-[#6](-[#1])(-[#1])-n:1:c(:n:c(:c:1-[#1])-[#1])-[#1])(-[#6]:[#6])-[#6]:[#6]	PAINS
759	thiazole_amine_M(1)	c:1(:n:c(:c(-[#1]):s:1)-c:2:c:c:n:c:c:2)-[#7](-[#1])-[#6]:[#6]-[#6](-[#1])-[#1]	PAINS
760	misc_pyrrole_thiaz(1)	c:1(:n:c(:c(-[#1]):s:1)-c:2:c:c:c:c:c:2)-[#6](-[#1])(-[#6](-[#1])-[#1])-[#6](-[#1])(-[#1])-[#6](-[#1])(-[#1])-[#7]-[#6](-[#1])(-[#1])-c:3:c:c:c:n:3-[#1]	PAINS
761	pyrrole_L(1)	n:1(-[#1]):c(:c(-[#6](-[#1])-[#1]):c(:c:1-[#6](-[#1])(-[#1])-[#6](-[#1])-[#1])-[#6](-[#1])(-[#1])-[#6](-[#1])-[#1])-[#6](=[#8])-[#8]-[#6](-[#1])-[#1]	PAINS
762	het_thio_65_D(1)	c:2(:n:c:1:c(:c(:c:c(:c:1-[#1])-[F,Cl,Br,I])-[#1]):n:2-[#1])-[#16]-[#6](-[#1])(-[#1])-[#6](=[#8])-[#7](-[#1])-[#6]:[#6]	PAINS
763	ene_misc_E(1)	c:1(:c(:c-2:c(:c(:c:1-[#8]-[#6](-[#1])-[#1])-[#1])-[#6]=[#6]-[#6](-[#1])-[#16]-2)-[#1])-[#8]-[#6](-[#1])-[#1]	PAINS
764	thio_cyano_A(1)	[#7]-1(-[#1])-[#6](=[#16])-[#6](-[#1])(-[#6]#[#7])-[#6](-[#1])(-[#6]:[#6])-[#6](=[#6]-1-[#6]:[#6])-[#1]	PAINS
765	cyano_amino_het_B(1)	n:1:c(:c(:c(:c(:c:1-[#16;X2]-c:2:c:c:c:c:c:2-[#7](-[#1])-[#1])-[#6]#[#7])-c:3:c:c:c:c:c:3)-[#6]#[#7])-[#7](-[#1])-[#1]	PAINS
766	cyano_pyridone_G(1)	[#7]-2(-c:1:c:c:c(:c:c:1)-[#8]-[#6](-[#1])-[#1])-[#6](=[#8])-[#6](=[#6]-[#6](=[#7]-2)-n:3:c:n:c:c:3)-[#6]#[#7]	PAINS
767	het_65_J(1)	o:1:c(:c:c:2:c:1:c(:c(:c(:c:2-[#1])-[#8]-[#6](-[#1])-[#1])-[#8]-[#6](-[#1])-[#1])-[#1])-[#6](~[#8])~[#8]	PAINS
768	ene_one_yne_A(1)	[#6]#[#6]-[#6](=[#8])-[#6]#[#6]	PAINS
769	anil_OH_no_alk_B(1)	c:2(:c:1:c(:c(:c(:c(:c:1:c(:c(:c:2-[#8]-[#1])-[#6]=[#8])-[#1])-[#1])-[#1])-[#1])-[#1])-[#7](-[#1])-[#1]	PAINS
770	hzone_acyl_misc_A(1)	c:1(:c(:c(:c(:o:1)-[$([#1]),$([#6](-[#1])-[#1])])-[#1])-[#1])-[#6](=[#8])-[#7](-[#1])-[#7]=[#6](-[$([#1]),$([#6](-[#1])-[#1])])-c:2:c:c:c:c(:c:2)-[*]-[*]-[*]-c:3:c:c:c:o:3	PAINS
771	thiophene_F(1)	[#16](=[#8])(=[#8])-[#7](-[#1])-c:1:c(:c(:c(:s:1)-[#6]-[#1])-[#6]-[#1])-[#6](=[#8])-[#7]-[#1]	PAINS
772	anil_OC_alk_E(1)	[#6](-[#1])(-[#1])-[#8]-c:1:c(:c(:c(:c(:c:1-[#1])-[#1])-[#1])-[#1])-[#7](-[#1])-[#6](-[#1])(-[#1])-[#6](-[#1])(-[#8]-[#1])-[#6](-[#1])-[#1]	PAINS
773	anil_OC_alk_F(1)	[#6](-[#1])(-[#1])-[#8]-c:1:c(:c(:c(:c(:c:1-[#1])-[#1])-[#1])-[#1])-[#7](-[#1])-[#6](-[#1])(-[#6]=[#8])-[#16]	PAINS
774	het_65_K(1)	n1nnnc2cccc12	PAINS
775	het_65_L(1)	c:1-2:c(-[#1]):s:c(:c:1-[#6](=[#8])-[#7]-[#7]=[#6]-2-[#7](-[#1])-[#1])-[#6]=[#8]	PAINS
776	coumarin_E(1)	c:1-3:c(:c:2:c(:c:c:1-[Br]):o:c:c:2)-[#6](=[#6]-[#6](=[#8])-[#8]-3)-[#1]	PAINS
777	coumarin_F(1)	c:1-3:c(:c:c:c:c:1)-[#6](=[#6](-[#6](=[#8])-[#7](-[#1])-c:2:n:o:c:c:2-[Br])-[#6](=[#8])-[#8]-3)-[#1]	PAINS
778	coumarin_G(1)	c:1-2:c(:c:c(:c:c:1-[F,Cl,Br,I])-[F,Cl,Br,I])-[#6](=[#6](-[#6](=[#8])-[#7](-[#1])-[#1])-[#6](=[#7]-[#1])-[#8]-2)-[#1]	PAINS
779	coumarin_H(1)	c:1-3:c(:c:c:c:c:1)-[#6](=[#6](-[#6](=[#8])-[#7](-[#1])-c:2:n:c(:c:s:2)-[#6]:[#16]:[#6]-[#1])-[#6](=[#8])-[#8]-3)-[#1]	PAINS
780	het_thio_67_A(1)	[#6](-[#1])(-[#1])-[#16;X2]-c:2:n:n:c:1-[#6]:[#6]-[#7]=[#6]-[#8]-c:1:n:2	PAINS
781	sulfonamide_I(1)	[#16](=[#8])(=[#8])(-c:1:c:n(-[#6](-[#1])-[#1]):c:n:1)-[#7](-[#1])-c:2:c:n(:n:c:2)-[#6](-[#1])(-[#1])-[#6]:[#6]-[#8]-[#6](-[#1])-[#1]	PAINS
782	het_65_mannich(1)	c:1-2:c(:c(:c(:c(:c:1-[#8]-[#6](-[#1])(-[#1])-[#8]-2)-[#6](-[#1])(-[#1])-[#7]-3-[#6](-[#1])(-[#1])-[#6](-[#1])(-[#1])-[#6]:[#6]-3)-[#1])-[#1])-[#1]	PAINS
783	anil_alk_A(1)	[#6](-[#1])(-[#1])-[#8]-[#6]:[#6]-[#6](-[#1])(-[#1])-[#7](-[#1])-c:2:c(:c(:c:1:n(:c(:n:c:1:c:2-[#1])-[#1])-[#6]-[#1])-[#1])-[#1]	PAINS
784	het_5_inium(1)	[#7]-4(-c:1:c:c:c:c:c:1)-[#6](=[#7+](-c:2:c:c:c:c:c:2)-[#6](=[#7]-c:3:c:c:c:c:c:3)-[#7]-4)-[#1]	PAINS
785	anil_di_alk_P(1)	[#6](-[#1])(-[#1])-[#7](-[#6](-[#1])-[#1])-c:2:c:c:c:1:s:c(:n:c:1:c:2)-[#16]-[#6](-[#1])-[#1]	PAINS
786	thio_urea_Q(1)	c:1:2:c(:c(:c(:c(:c:1:c(:c(-[#1]):c(:c:2-[#1])-[#1])-[#6](-[#6](-[#1])-[#1])=[#7]-[#7](-[#1])-[#6](=[#16])-[#7](-[#1])-[#6]:[#6]:[#6])-[#1])-[#1])-[#1])-[#1]	PAINS
787	thio_pyridine_A(1)	[#6]:1(:[#7]:[#6](:[#7]:[!#1]:[#7]:1)-c:2:c(:c(:c(:o:2)-[#1])-[#1])-[#1])-[#16]-[#6;X4]	PAINS
788	melamine_B(1)	n:1:c(:n:c(:n:c:1-[#7](-[#6](-[#1])-[#1])-[#6](-[#1])-[#1])-[#7](-[#6](-[#1])-[#1])-[#6](-[#1])-[#1])-[#7](-[#6]-[#1])-[#6]=[#8]	PAINS
789	misc_phthal_thio_N(1)	c:1(:n:s:c(:n:1)-[#7](-[#6](-[#1])-[#1])-[#6](-[#1])(-[#1])-[#6](-[#1])(-[#1])-[#7]-[#6](=[#8])-c:2:c:c:c:c:c:2-[#6](=[#8])-[#8]-[#1])-c:3:c:c:c:c:c:3	PAINS
790	hzone_acyl_misc_B(1)	n:1:c(:c(:c(:c(:c:1-[#1])-[#1])-[#1])-[#1])-[#6](=[#8])-[#7](-[#1])-[#7]=[#6](-[#1])-c:2:c:c:c:c:c:2-[#8]-[#6](-[#1])(-[#1])-[#6](=[#8])-[#8]-[#1]	PAINS
791	tert_butyl_B(1)	[#6](-[#1])(-[#1])(-[#1])-[#6](-[#6](-[#1])(-[#1])-[#1])(-[#6](-[#1])(-[#1])-[#1])-c:1:c(:c(:c(:c(:c:1-[#8]-[#1])-[#6](-[#6](-[#1])(-[#1])-[#1])(-[#6](-[#1])(-[#1])-[#1])-[#6](-[#1])(-[#1])-[#1])-[#1])-[#6](-[#1])(-[#1])-c:2:c:c:c(:c(:c:2-[#1])-[#1])-[#8]-[#1])-[#1]	PAINS
792	diazox_E(1)	[#7](-[#1])(-[#1])-c:1:c(-[#7](-[#1])-[#1]):c(:c(-[#1]):c:2:n:o:n:c:1:2)-[#1]	PAINS
793	anil_NH_no_alk_B(1)	[#7](-[#1])(-[#1])-c:1:c(:c(:c(:c(:c:1-[#7](-[#1])-[#16](=[#8])=[#8])-[#1])-[#7](-[#1])-[#6](-[#1])-[#1])-[F,Cl,Br,I])-[#1]	PAINS
794	anil_no_alk_A(1)	[#7](-[#1])(-[#1])-c:1:c(:c(:c(:c(:c:1-[#7]=[#6]-2-[#6](=[#6]~[#6]~[#6]=[#6]-2)-[#1])-[#1])-[#1])-[#1])-[#1]	PAINS
795	anil_no_alk_B(1)	[#7](-[#1])(-[#1])-c:1:c(:c(:c(:c(:c:1-n:2:c:c:c:c:2)-[#1])-[#6](-[#1])-[#1])-[#6](-[#1])-[#1])-[#1]	PAINS
796	thio_ene_amine_A(1)	[#16]=[#6]-[#6](-[#6](-[#1])-[#1])=[#6](-[#6](-[#1])-[#1])-[#7](-[#6](-[#1])-[#1])-[#6](-[#1])-[#1]	PAINS
797	het_55_B(1)	[#6]-1:[#6]-[#8]-[#6]-2-[#6](-[#1])(-[#1])-[#6](=[#8])-[#8]-[#6]-1-2	PAINS
798	cyanamide_A(1)	[#8]-[#6](=[#8])-[#6](-[#1])(-[#1])-[#16;X2]-[#6](=[#7]-[#6]#[#7])-[#7](-[#1])-c:1:c:c:c:c:c:1	PAINS
799	ene_one_one_A(1)	[#8]=[#6]-[#6]-1=[#6](-[#16]-[#6](=[#6](-[#1])-[#6])-[#16]-1)-[#6]=[#8]	PAINS
800	ene_six_het_D(1)	[#8]=[#6]-1-[#7]-[#7]-[#6](=[#7]-[#6]-1=[#6]-[#1])-[!#1]:[!#1]	PAINS
801	ene_cyano_E(1)	[#8]=[#6]-[#6](-[#1])=[#6](-[#6]#[#7])-[#6]	PAINS
802	ene_cyano_F(1)	[#8](-[#1])-[#6](=[#8])-c:1:c(:c(:c(:c(:c:1-[#8]-[#1])-[#1])-c:2:c(-[#1]):c(:c(:o:2)-[#6](-[#1])=[#6](-[#6]#[#7])-c:3:n:c:c:n:3)-[#1])-[#1])-[#1]	PAINS
803	hzone_furan_C(1)	c:1:c(:c:c:c:c:1)-[#7](-c:2:c:c:c:c:c:2)-[#7]=[#6](-[#1])-[#6]:3:[#6](:[#6](:[#6](:[!#1]:3)-c:4:c:c:c:c(:c:4)-[#6](=[#8])-[#8]-[#1])-[#1])-[#1]	PAINS
804	anil_no_alk_C(1)	[#7](-[#1])(-[#1])-c:1:c(:c(:c(:c(:c:1-[#1])-[#1])-c:2:c(-[#1]):c(:c(-[#6](-[#1])-[#1]):o:2)-[#6]=[#8])-[#1])-[#1]	PAINS
805	hzone_acid_D(1)	[#8](-[#1])-[#6](=[#8])-c:1:c:c:c(:c:c:1)-[#7]-[#7]=[#6](-[#1])-[#6]:2:[#6](:[#6](:[#6](:[!#1]:2)-c:3:c:c:c:c:c:3)-[#1])-[#1]	PAINS
806	hzone_furan_E(1)	[#8](-[#1])-[#6](=[#8])-c:1:c:c:c:c(:c:1)-[#6]:[!#1]:[#6]-[#6]=[#7]-[#7](-[#1])-[#6](=[#8])-[#6](-[#1])(-[#1])-[#8]	PAINS
807	het_6_pyridone_NH2(1)	[#8](-[#1])-[#6]:1:[#6](:[#6]:[!#1]:[#6](:[#7]:1)-[#7](-[#1])-[#1])-[#6](-[#1])(-[#1])-[#6](=[#8])-[#8]	PAINS
808	imine_one_fives_D(1)	[#6]-1(=[!#6&!#1])-[#6](-[#7]=[#6]-[#16]-1)=[#8]	PAINS
809	pyrrole_M(1)	n2(-c:1:c:c:c:c:c:1)c(c(-[#1])c(c2-[#6]=[#7]-[#8]-[#1])-[#1])-[#1]	PAINS
810	pyrrole_N(1)	n2(-[#6](-[#1])-c:1:c(:c(:c:c(:c:1-[#1])-[#1])-[#1])-[#1])c(c(-[#1])c(c2-[#6]-[#1])-[#1])-[#6]-[#1]	PAINS
811	pyrrole_O(1)	n1(-[#6](-[#1])-[#1])c(c(-[#6](=[#8])-[#6])c(c1-[#6]:[#6])-[#6])-[#6](-[#1])-[#1]	PAINS
812	ene_cyano_G(1)	n1(-[#6])c(c(-[#1])c(c1-[#6](-[#1])=[#6](-[#6]#[#7])-c:2:n:c:c:s:2)-[#1])-[#1]	PAINS
813	sulfonamide_J(1)	n3(-c:1:c:c:c:c:c:1-[#7](-[#1])-[#16](=[#8])(=[#8])-c:2:c:c:c:s:2)c(c(-[#1])c(c3-[#1])-[#1])-[#1]	PAINS
814	misc_pyrrole_benz(1)	n2(-c:1:c(:c(:c(:c(:c:1-[#1])-[#1])-[#1])-[#1])-[#6](=[#8])-[#7](-[#1])-[#6](-[#1])(-[#6](-[#1])-[#1])-[#6](-[#1])(-[#1])-[#8]-[#6]:[#6])c(c(-[#1])c(c2-[#1])-[#1])-[#1]	PAINS
815	thio_urea_R(1)	c:1(:c:c:c:c:c:1)-[#7](-[#1])-[#6](=[#16])-[#7]-[#7](-[#1])-[#6](-[#1])=[#6](-[#1])-[#6]=[#8]	PAINS
816	ene_one_one_B(1)	[#6]-1(-[#6](=[#8])-[#6](-[#1])(-[#1])-[#6]-[#6](-[#1])(-[#1])-[#6]-1=[#8])=[#6](-[#7]-[#1])-[#6]=[#8]	PAINS
817	dhp_amino_CN_H(1)	[#7](-[#1])(-[#1])-[#6]-1=[#6](-[#6]#[#7])-[#6](-[#1])(-[#6]:[#6])-[#16]-[#6;X4]-[#16]-1	PAINS
818	het_66_anisole(1)	[#6](-[#1])(-[#1])-[#8]-c:1:c(:c(:c(:c(:c:1-[#1])-[#1])-[#1])-[#1])-[#7](-[#1])-c:2:c:c:n:c:3:c(:c:c:c(:c:2:3)-[#8]-[#6](-[#1])-[#1])-[#8]-[#6](-[#1])-[#1]	PAINS
819	thiazole_amine_N(1)	[#6](-[#1])(-[#1])-[#8]-c:1:c(:c(:c(:c(:c:1-[#1])-[#1])-[#8]-[#6](-[#1])-[#1])-[#1])-[#7](-[#1])-c:2:n:c(:c:s:2)-c:3:c:c:c(:c:c:3)-[#8]-[#6](-[#1])-[#1]	PAINS
820	het_pyridiniums_C(1)	[#6]~1~3~[#7](-[#6]:[#6])~[#6]~[#6]~[#6]~[#6]~1~[#6]~2~[#7]~[#6]~[#6]~[#6]~[#7+]~2~[#7]~3	PAINS
821	het_5_E(1)	[#7]-3(-c:2:c:1:c:c:c:c:c:1:c:c:c:2)-[#7]=[#6](-[#6](-[#1])-[#1])-[#6](-[#1])(-[#1])-[#6]-3=[#8]	PAINS
1195	aromatic NO2	O~N(=O)-c(:*):*	LINT
1196	deuterium	[2H]	LINT
1197	C13	[13#6]	LINT
1198	2-chloropyridine	n1c(cccc1)Cl	LINT
1199	aniline	[NH2D1]-c(:*):*	LINT
1200	Si,B,Se atoms	[Si,B,Se]	LINT
1201	hetero imides	[!#6]-[CH2]-N1C(=O)CCC(=O)1	LINT
1202	poly ethers	O[CH2][CH2]O-!@[CH2][CH2]O	LINT
1203	acyclic imines	C-!@[NX2]=[C!R,#1]-C	LINT
1204	alkyl esters of S or P	[S,P](=O)OC	LINT
1205	ugly P compounds	P(=[O,S])[C,N]([C,N])[C,N]	LINT
1206	acyclic N-,=N and not N bound to carbonyl or sulfone	[N;!$(N-[C,S]=*)]-,=;!@[N;!$(N-[C,S]=*)]	LINT
1207	acyclic N-C-N	N-!@[CX4]-!@N	LINT
1208	acyclic N-S	N-!@[SX2]-*	LINT
1209	mustards	[N,S,O][CH2][CH2]-[F,Cl,Br,I]	LINT
1210	aldehyde	O=[C!H0]	LINT
1211	1,2-dicarbonyl not in ring	O=[CX3]-!@[CX3]=O	LINT
1212	carbamate, T-boc Protected	NC(OC([CH3])([CH3])[CH3])=O	LINT
1213	carbamate, CBZ Protected	NC(O[CH2]c1ccccc1)=O	LINT
1214	carbamate include di-substitued N	OC(=O)-!@[NX3]	LINT
1215	acyl halide	O=C-[F,Cl,Br,I]	LINT
1216	alkyl halide	[CH2]-[Cl,Br,I]	LINT
1217	alpha halo carbonyl	O=C-C-[F,Cl,Br,I]	LINT
1218	sufonyl halide	S(=O)(=O)-[F,Cl,Br,I]	LINT
1219	N:C-SCH2 groups	[ND1]=C-!@[SX2]-[CH2D2]	LINT
1220	26	N-C(=S)-N	LINT
1221	terminal vinyl	[CH2D1]=[CD2]-!@*	LINT
1222	28	S=P~*	LINT
1223	thio cyanates	S-C#N	LINT
1224	thiols	*-[S!H0]	LINT
1225	thionyl	[Sv4](=O)(-!@[!#1])-!@[!#1]	LINT
1226	n-haloamines	N-[F,Cl,Br,I]	LINT
1227	N-C-Hal or cyano methyl	N-C-[F,Cl,Br,I,$(C#N)]	LINT
1228	alpha beta-unsaturated ketones; center of Michael reactivity	[$(C#N),$(N(~O)~O),$(C=O),$(S(=O)=O),$(C(F)(F)F),Cl][C!H0]=[C!H0]	LINT
1229	aliphatic ketone not ring and not di-carbonyl	[C;!$(C=*)][C!R](=O)[CH2D2]	LINT
1230	aliphatic ester, not lactones	C[C!R](=O)[O!R][CH2D2]	LINT
1231	long aliphatic chain, 6+	[CH2][CH2][CH2]-!@[CH2][CH2][CH2]	LINT
1232	quinones	O=[#6]1[#6]:,=[#6][#6](=O)[#6]:,=[#6]1	LINT
1233	acyclic C=C-O	C=C-!@O-*	LINT
1234	acyclic C=N-H	[NH1X2]=[C!R;!$(C(-N)(=[NH1])-N)]	LINT
1235	acyclic NO not nitro	O-!@[N;!$(N(=O)=O);!$([N+](=O)[O-])]	LINT
1236	42	S-S	LINT
1237	43	O~O	LINT
1238	thioester	C-C(=O)[SD2]	LINT
1239	aziridine-like N in 3-membered ring	N~1~*~*1	LINT
1240	epoxides	O~1C~*1	LINT
1241	aryl iodide	I-c:*	LINT
1242	aryl bromide	Br-c:*	LINT
1243	multiple aromatic rings	a1aaa2a(a1)aaa(a2):a	LINT
1244	multiple aromatic rings	[!#1]-,:1-:a2a(-:[!#1]:3:a1aaaa3)aaaa2	LINT
1245	S/PO3 groups	[P,S](~O)(~O)~O	LINT
1246	adamantyl	C12CC3CC(C1)CC(C2)C3	LINT
1247	too many cyano Groups (>1)	C#N.C#N	LINT
1248	too many COOH groups (>1)	[CX3](=O)[OH1].[CX3](=O)[OH1]	LINT
1249	amino acid	[NH2][CX4]C(=O)O	LINT
1250	chlorates	Cl~O	LINT
1251	high halogen content (>3)	[F,Cl,Br,I].[F,Cl,Br,I].[F,Cl,Br,I].[F,Cl,Br,I]	LINT

## Sheet: FooDB
id	name	SMILES	1	2	3	4	5	6	7	8	9	10	11	12	13	14	15	16	17	18	19	20	21	22	23	24	25	26	27	28	29	30	31	32	33	34	35	36	37	38	39	40	41	42	43	44	45	46	47
1	Mulberrofuran P	Cc1cc2c3c(c1O)-c1ccc(O)cc1OC3(c1ccc(O)cc1O)Oc1cc(-c3cc4cccc(O)c4o3)cc(O)c1-2	0	0	0	0	0	0	0	0	0	0	0	0	0	0	0	0	0	0	0	0	0	0	0	0	0	0	0	0	0	0	0	0	0	0	0	0	0	0	0	0	0	0	0	0	0	0	0
4	Cyanidin 3-(6''-acetyl-galactoside)	CC(=O)OCC1OC(Oc2cc3c(O)cc(O)cc3[o+]c2-c2ccc(O)c(O)c2)C(O)C(O)C1O	0	0	0	0	0	0	0	0	0	0	0	0	0	0	0	0	0	0	0	0	0	0	0	0	0	0	0	0	0	0	0	0	0	0	0	0	0	0	0	0	0	0	0	0	0	0	0
13	Cyanidin 3-(6''-succinyl-glucoside)	O=C(O)CCC(=O)OCC1OC(Oc2cc3c(O)cc(O)cc3[o+]c2-c2ccc(O)c(O)c2)C(O)C(O)C1O	0	0	0	0	0	0	0	0	0	0	0	0	0	0	0	0	0	0	0	0	0	0	0	0	0	0	0	0	0	0	0	0	0	0	0	0	0	0	0	0	0	0	0	0	0	0	0
14	Pelargonidin 3-(6''-succinyl-glucoside)	O=C(O)CCC(=O)OCC1OC(Oc2cc3c(O)cc(O)cc3[o+]c2-c2ccc(O)cc2)C(O)C(O)C1O	0	0	0	0	0	0	0	0	0	0	0	0	0	0	0	0	0	0	0	0	0	0	0	0	0	0	0	0	0	0	0	0	0	0	0	0	0	0	0	0	0	0	0	0	0	0	0
22	Cyanidin 3-O-(6''-acetyl-arabinoside)	CC(=O)OCC1OC(Oc2cc3c(O)cc(O)cc3[o+]c2-c2ccc(O)c(O)c2)C(O)C1O	0	0	0	0	0	0	0	0	0	0	0	0	0	0	0	0	0	0	0	0	0	0	0	0	0	0	0	0	0	0	0	0	0	0	0	0	0	0	0	0	0	0	0	0	0	0	0
24	Petunidin 3-O-(6''-acetyl-galactoside)	COc1cc(-c2[o+]c3cc(O)cc(O)c3cc2OC2OC(COC(C)=O)C(O)C(O)C2O)cc(O)c1O	0	0	0	0	0	0	0	0	0	0	0	0	0	0	0	0	0	0	0	0	0	0	0	0	0	0	0	0	0	0	0	0	0	0	0	0	0	0	0	0	0	0	0	0	0	0	0
25	Peonidin 3-(6''-acetyl-galactoside)	COc1cc(-c2[o+]c3cc(O)cc(O)c3cc2OC2OC(COC(C)=O)C(O)C(O)C2O)ccc1O	0	0	0	0	0	0	0	0	0	0	0	0	0	0	0	0	0	0	0	0	0	0	0	0	0	0	0	0	0	0	0	0	0	0	0	0	0	0	0	0	0	0	0	0	0	0	0
27	Malvidin 3-(6''-acetyl-galactoside)	COc1cc(-c2[o+]c3cc(O)cc(O)c3cc2OC2OC(COC(C)=O)C(O)C(O)C2O)cc(OC)c1O	0	0	0	0	0	0	0	0	0	0	0	0	0	0	0	0	0	0	0	0	0	0	0	0	0	0	0	0	0	0	0	0	0	0	0	0	0	0	0	0	0	0	0	0	0	0	0
31	Pelargonidin 3-arabinoside	OCC1OC(Oc2cc3c(O)cc(O)cc3[o+]c2-c2ccc(O)cc2)C(O)C1O	0	0	0	0	0	0	0	0	0	0	0	0	0	0	0	0	0	0	0	0	0	0	0	0	0	0	0	0	0	0	0	0	0	0	0	0	0	0	0	0	0	0	0	0	0	0	0
35	Peonidin 3-(6''-p-coumaroyl-glucoside)	COc1cc(-c2[o+]c3cc(O)cc(O)c3cc2OC2OC(COC(=O)C=Cc3ccc(O)cc3)C(O)C(O)C2O)ccc1O	0	0	0	0	0	0	0	0	0	0	0	0	0	0	0	0	0	0	0	0	0	0	0	0	0	0	0	0	0	0	0	0	0	0	0	0	0	0	0	0	0	0	0	0	0	0	0
40	Delphinidin 3-xyloside	OCC1OC(Oc2cc3c(O)cc(O)cc3[o+]c2-c2cc(O)c(O)c(O)c2)C(O)C1O	0	0	0	0	0	0	0	0	0	0	0	0	0	0	0	0	0	0	0	0	0	0	0	0	0	0	0	0	0	0	0	0	0	0	0	0	0	1	0	0	0	0	0	0	0	0	0
41	Petunidin 3-(6''-p-coumaroyl-glucoside)	COc1cc(-c2[o+]c3cc(O)cc(O)c3cc2OC2OC(COC(=O)C=Cc3ccc(O)cc3)C(O)C(O)C2O)cc(O)c1O	0	0	0	0	0	0	0	0	0	0	0	0	0	0	0	0	0	0	0	0	0	0	0	0	0	0	0	0	0	0	0	0	0	0	0	0	0	0	0	0	0	0	0	0	0	0	0
48	p-Coumaroyl vitisin A	COc1cc(-c2[o+]c3cc(O)cc4oc(C(=O)O)cc(c2OC2OC(COC(=O)C=Cc5ccc(O)cc5)C(O)C(O)C2O)c43)cc(OC)c1O	0	0	0	0	0	0	0	0	0	0	0	0	0	0	0	0	0	0	0	0	0	0	0	0	0	0	0	0	0	0	0	0	0	0	0	0	0	0	0	0	0	0	0	0	0	0	0
52	Pinotin A	COc1cc(-c2[o+]c3cc(O)cc4oc(-c5ccc(O)c(O)c5)cc(c2OC2OC(CO)C(O)C(O)C2O)c43)cc(OC)c1O	0	0	0	0	0	0	0	0	0	0	0	0	0	0	0	0	0	0	0	0	0	0	0	0	0	0	0	0	0	0	0	0	0	0	0	0	0	0	0	0	0	0	0	0	0	0	0
55	Malvidin 3-(6''-caffeoyl-glucoside)	COc1cc(-c2[o+]c3cc(O)cc(O)c3cc2OC2OC(COC(=O)C=Cc3ccc(O)c(O)c3)C(O)C(O)C2O)cc(OC)c1O	0	0	0	0	0	0	0	0	0	0	0	0	0	0	0	0	0	0	0	0	0	0	0	0	0	0	0	0	0	0	0	0	0	0	0	0	0	0	0	0	0	0	0	0	0	0	0
59	Peonidin 3-(6''-malonyl-glucoside)	COc1cc(-c2[o+]c3cc(O)cc(O)c3cc2OC2OC(COC(=O)CC(=O)O)C(O)C(O)C2O)ccc1O	0	0	0	0	0	0	0	0	0	0	0	0	0	0	0	0	0	0	0	0	0	0	0	0	0	0	0	0	0	0	0	0	0	0	0	0	0	0	0	0	0	0	0	0	0	0	0
61	Cyanidin 3-O-dimalonyl-laminaribioside	O=C(O)CC(=O)OCC1OC(OC2C(O)C(COC(=O)CC(=O)O)OC(Oc3cc4c(O)cc(O)cc4[o+]c3-c3ccc(O)c(O)c3)C2O)C(O)C(O)C1O	0	0	0	0	0	0	0	0	0	0	0	0	0	0	0	0	0	0	0	0	0	0	0	0	0	0	0	0	0	0	0	0	0	0	0	0	0	0	0	0	0	0	0	0	0	0	0
62	Cyanidin 3-O-(6''-malonyl-arabinoside)	O=C(O)CC(=O)OCC1OC(Oc2cc3c(O)cc(O)cc3[o+]c2-c2ccc(O)c(O)c2)C(O)C1O	0	0	0	0	0	0	0	0	0	0	0	0	0	0	0	0	0	0	0	0	0	0	0	0	0	0	0	0	0	0	0	0	0	0	0	0	0	0	0	0	0	0	0	0	0	0	0
64	Cyanidin 3-O-(6''-malonyl-3''-glucosyl-glucoside)	O=C(O)CC(=O)OCC1OC(Oc2cc3c(O)cc(O)cc3[o+]c2-c2ccc(O)c(O)c2)C(O)C(OC2OC(CO)C(O)C(O)C2O)C1O	0	0	0	0	0	0	0	0	0	0	0	0	0	0	0	0	0	0	0	0	0	0	0	0	0	0	0	0	0	0	0	0	0	0	0	0	0	0	0	0	0	0	0	0	0	0	0
66	Cyanidin 3-O-(2"-xylosyl-6"-(6"'-caffeoyl-glucosyl)-galactoside)	O=C(C=Cc1ccc(O)c(O)c1)OCC1OC(OCC2OC(Oc3cc4c(O)cc(O)cc4[o+]c3-c3ccc(O)c(O)c3)C(OCC3OC(O)C(O)C3O)C(O)C2O)C(O)C(O)C1O	0	0	0	0	0	0	0	0	0	0	0	0	0	0	0	0	0	0	0	0	0	0	0	0	0	0	0	0	0	0	0	0	0	0	0	0	0	0	0	0	0	0	0	0	0	0	0
69	Cyanidin 3-O-(2"-xylosyl-6"-(6"'-sinapoyl-glucosyl)-galactoside)	COc1cc(C=CC(=O)OCC2OC(OCC3OC(Oc4cc5c(O)cc(O)cc5[o+]c4-c4ccc(O)c(O)c4)C(OCC4OC(O)C(O)C4O)C(O)C3O)C(O)C(O)C2O)cc(OC)c1O	0	0	0	0	0	0	0	0	0	0	0	0	0	0	0	0	0	0	0	0	0	0	0	0	0	0	0	0	0	0	0	0	0	0	0	0	0	0	0	0	0	0	0	0	0	0	0
70	Cyanidin 3-O-(2"-xylosyl-6"-(6"'-feruloyl-glucosyl)-galactoside)	COc1cc(C=CC(=O)OCC2OC(OCC3OC(Oc4cc5c(O)cc(O)cc5[o+]c4-c4ccc(O)c(O)c4)C(OCC4OC(O)C(O)C4O)C(O)C3O)C(O)C(O)C2O)ccc1O	0	0	0	0	0	0	0	0	0	0	0	0	0	0	0	0	0	0	0	0	0	0	0	0	0	0	0	0	0	0	0	0	0	0	0	0	0	0	0	0	0	0	0	0	0	0	0
72	Delphinidin 3-(6''-malonylglucoside)	O=C(O)CC(=O)OCC1OC(Oc2cc3c(O)cc(O)cc3[o+]c2-c2cc(O)c(O)c(O)c2)C(O)C(O)C1O	0	0	0	0	0	0	0	0	0	0	0	0	0	0	0	0	0	0	0	0	0	0	0	0	0	0	0	0	0	0	0	0	0	0	0	0	0	1	0	0	0	0	0	0	0	0	0
74	Luteolinidin 3-glucoside	OCC1OC(Oc2cc(O)cc3[o+]c(-c4ccc(O)c(O)c4)ccc23)C(O)C(O)C1O	0	0	0	0	0	0	0	0	0	0	0	0	0	0	0	0	0	0	0	0	0	0	0	0	0	0	0	0	0	0	0	0	0	0	0	0	0	0	0	0	0	0	0	0	0	0	0
75	Delphinidin 3-feruloylglucoside	COc1cc(C=CC(=O)OCC2OC(Oc3cc4c(O)cc(O)cc4[o+]c3-c3cc(O)c(O)c(O)c3)C(O)C(O)C2O)ccc1O	0	0	0	0	0	0	0	0	0	0	0	0	0	0	0	0	0	0	0	0	0	0	0	0	0	0	0	0	0	0	0	0	0	0	0	0	0	1	0	0	0	0	0	0	0	0	0
78	Luteolinidin	Oc1cc(O)c2ccc(-c3ccc(O)c(O)c3)[o+]c2c1	0	0	0	0	0	0	0	0	0	0	0	0	0	0	0	0	0	0	0	0	0	0	0	0	0	0	0	0	0	0	0	0	0	0	0	0	0	0	0	0	0	0	0	0	0	0	0
80	Pigment A aglycone	COc1cc(-c2[o+]c3cc(O)cc4oc(-c5ccc(O)cc5)cc(c2O)c43)cc(OC)c1O	0	0	0	0	0	0	0	0	0	0	0	0	0	0	0	0	0	0	0	0	0	0	0	0	0	0	0	0	0	0	0	0	0	0	0	0	0	0	0	0	0	0	0	0	0	0	0
81	Pinotin A aglycone	COc1cc(-c2[o+]c3cc(O)cc4oc(-c5ccc(O)c(O)c5)cc(c2O)c43)cc(OC)c1O	0	0	0	0	0	0	0	0	0	0	0	0	0	0	0	0	0	0	0	0	0	0	0	0	0	0	0	0	0	0	0	0	0	0	0	0	0	0	0	0	0	0	0	0	0	0	0
82	Butein	O=C(C=Cc1ccc(O)c(O)c1)c1ccc(O)cc1O	0	0	0	0	0	0	0	0	0	0	0	0	0	0	0	0	0	0	0	0	0	0	0	0	0	0	0	0	0	0	0	0	0	0	0	0	0	0	0	0	0	0	0	0	0	0	0
83	Phloretin xylosyl-galactoside	O=C(CCc1ccc(O)cc1)c1c(O)cc(O)cc1OC1OC(CO)C(O)C(O)C1OC1OC(CO)C(O)C1O	0	0	0	0	0	0	0	0	0	0	0	0	0	0	0	0	0	0	0	0	0	0	0	0	0	0	0	0	0	0	0	0	0	0	0	0	0	0	0	0	0	0	0	0	0	0	0
84	Phloretin-2'-O-(2''-O-xylosylglucoside)	O=C(CCc1ccc(O)cc1)c1c(O)cc(O)cc1OC1OC(CO)C(O)C(O)C1OC1OC(CO)C(O)C1O	0	0	0	0	0	0	0	0	0	0	0	0	0	0	0	0	0	0	0	0	0	0	0	0	0	0	0	0	0	0	0	0	0	0	0	0	0	0	0	0	0	0	0	0	0	0	0
85	3-Hydroxyphloretin 2'-O-xylosyl-glucoside	O=C(CCc1ccc(O)c(O)c1)c1c(O)cc(O)cc1OC1OC(COC2OCC(O)C(O)C2O)C(O)C(O)C1O	0	0	0	0	0	0	0	0	0	0	0	0	0	0	0	0	0	0	0	0	0	0	0	0	0	0	0	0	0	0	0	0	0	0	0	0	0	0	0	0	0	0	0	0	0	0	0
86	3-Hydroxyphloretin 2'-O-glucoside	O=C(CCc1ccc(O)c(O)c1)c1c(O)cc(O)cc1OC1OC(CO)C(O)C(O)C1O	0	0	0	0	0	0	0	0	0	0	0	0	0	0	0	0	0	0	0	0	0	0	0	0	0	0	0	0	0	0	0	0	0	0	0	0	0	0	0	0	0	0	0	0	0	0	0
87	3-Hydroxyphloretin	O=C(CCc1ccc(O)c(O)c1)c1c(O)cc(O)cc1O	0	0	0	0	0	0	0	0	0	0	0	0	0	0	0	0	0	0	0	0	0	0	0	0	0	0	0	0	0	0	0	0	0	0	0	0	0	0	0	0	0	0	0	0	0	0	0
94	Isoneotheaflavin 3-O-gallate	O=C(OC1Cc2c(O)cc(O)cc2OC1c1cc(O)c(=O)c2c(O)c(O)cc(C3Oc4cc(O)cc(O)c4CC3O)c2c1)c1cc(O)c(O)c(O)c1	0	0	0	0	0	0	0	0	0	0	0	0	0	0	0	0	0	0	0	0	0	0	0	0	0	0	0	0	0	0	0	0	0	0	0	0	0	1	0	0	0	0	0	0	0	0	0
95	ent-Gallocatechin 3-gallate	O=C(OC1Cc2c(O)cc(O)cc2OC1c1cc(O)c(O)c(O)c1)c1cc(O)c(O)c(O)c1	0	0	0	0	0	0	0	0	0	0	0	0	0	0	0	0	0	0	0	0	0	0	0	0	0	0	0	0	0	0	0	0	0	0	0	0	0	1	0	0	0	0	0	0	0	0	0
97	ent-Catechin 3-gallate	O=C(OC1Cc2c(O)cc(O)cc2OC1c1ccc(O)c(O)c1)c1cc(O)c(O)c(O)c1	0	0	0	0	0	0	0	0	0	0	0	0	0	0	0	0	0	0	0	0	0	0	0	0	0	0	0	0	0	0	0	0	0	0	0	0	0	1	0	0	0	0	0	0	0	0	0
98	Isoneotheaflavin	O=c1c(O)cc(C2Oc3cc(O)cc(O)c3CC2O)cc2c(C3Oc4cc(O)cc(O)c4CC3O)cc(O)c(O)c12	0	0	0	0	0	0	0	0	0	0	0	0	0	0	0	0	0	0	0	0	0	0	0	0	0	0	0	0	0	0	0	0	0	0	0	0	0	0	0	0	0	0	0	0	0	0	0
108	Procyanidin trimer EEC	Oc1cc(O)c2c(c1)OC(c1ccc(O)c(O)c1)C(O)C2c1c(O)cc(O)c2c1OC(c1ccc(O)c(O)c1)C(O)C2c1c(O)cc(O)c2c1OC(c1ccc(O)c(O)c1)C(O)C2	0	0	0	0	0	0	0	0	0	0	0	0	0	0	0	0	0	0	0	0	0	0	0	0	0	0	0	0	0	0	0	0	0	0	0	0	0	0	0	0	0	0	0	0	0	0	0
115	Prodelphinidin trimer GC-GC-C	CC(C)CC(NC(=O)C(CC(C)C)NC(=O)C(C[SeH])NC(=O)C(N)CC(N)=O)C(=O)O	0	0	0	0	0	0	0	0	0	0	0	0	0	0	0	0	0	0	0	0	0	0	0	0	0	0	0	0	0	0	0	0	0	0	0	0	0	0	0	0	0	0	0	0	0	0	0
122	Prodelphinidin trimer GC-C-C	Oc1cc(O)c2c(c1)OC(c1cc(O)c(O)c(O)c1)C(O)C2c1c(O)cc(O)c2c1OC(c1cc(O)c(O)c(O)c1)C(O)C2c1c(O)cc(O)c2c1OC(c1ccc(O)c(O)c1)C(O)C2	0	0	0	0	0	0	0	0	0	0	0	0	0	0	0	0	0	0	0	0	0	0	0	0	0	0	0	0	0	0	0	0	0	0	0	0	0	1	0	0	0	0	0	0	0	0	0
123	Prodelphinidin trimer C-GC-C	Oc1cc(O)c2c(c1)OC(c1cc(O)c(O)c(O)c1)C(O)C2c1c(O)cc(O)c2c1OC(c1cc(O)c(O)c(O)c1)C(O)C2c1c(O)cc(O)c2c1OC(c1ccc(O)c(O)c1)C(O)C2	0	0	0	0	0	0	0	0	0	0	0	0	0	0	0	0	0	0	0	0	0	0	0	0	0	0	0	0	0	0	0	0	0	0	0	0	0	1	0	0	0	0	0	0	0	0	0
126	Epicatechin-(2alpha->7,4alpha->8)-epicatechin 3-galactoside	OCC1OC(OC2C3c4c(O)cc(O)cc4OC2(c2ccc(O)c(O)c2)Oc2ccc4c(c23)OC(c2ccc(O)c(O)c2)CC4)C(O)C(O)C1O	0	0	0	0	0	0	0	0	0	0	0	0	0	0	0	0	0	0	0	0	0	0	0	0	0	0	0	0	0	0	0	0	0	0	0	0	0	0	0	0	0	0	0	0	0	0	0
133	6-Geranylnaringenin	CC(C)=CCCC(C)=CCc1c(O)cc2c(c1O)C(=O)CC(c1ccc(O)cc1)O2	0	0	0	0	0	0	0	0	0	0	0	0	0	0	0	0	0	0	0	0	0	0	0	0	0	0	0	0	0	0	0	0	0	0	0	0	0	0	0	0	0	0	0	0	0	0	0
135	Luteolin 7-O-diglucuronide	O=C(O)C1OC(OC(=O)C2OC(Oc3cc(O)c4c(=O)cc(-c5ccc(O)c(O)c5)oc4c3)C(O)C(O)C2O)C(O)C(O)C1O	0	0	0	0	0	0	0	0	0	0	0	0	0	0	0	0	0	0	0	0	0	0	0	0	0	0	0	0	0	0	0	0	0	0	0	0	0	0	0	0	0	0	0	0	0	0	0
136	Apigenin 6-C-arabinoside 8-C-glucoside	O=c1cc(-c2ccc(O)cc2)oc2c(C3OC(CO)C(O)C(O)C3O)c(O)c(C3OC(CO)C(O)C3O)c(O)c12	0	0	0	0	0	0	0	0	0	0	0	0	0	0	0	0	0	0	0	0	0	0	0	0	0	0	0	0	0	0	0	0	0	0	0	0	0	0	0	0	0	0	0	0	0	0	0
137	Apigenin 6-C-galactoside 8-C-arabinoside	O=c1cc(-c2ccc(O)cc2)oc2c(C3OC(CO)C(O)C3O)c(O)c(C3OC(CO)C(O)C(O)C3O)c(O)c12	0	0	0	0	0	0	0	0	0	0	0	0	0	0	0	0	0	0	0	0	0	0	0	0	0	0	0	0	0	0	0	0	0	0	0	0	0	0	0	0	0	0	0	0	0	0	0
138	Apigenin 7-O-glucuronide	O=C(O)C1OC(Oc2cc(O)c3c(=O)cc(-c4ccc(O)cc4)oc3c2)C(O)C(O)C1O	0	0	0	0	0	0	0	0	0	0	0	0	0	0	0	0	0	0	0	0	0	0	0	0	0	0	0	0	0	0	0	0	0	0	0	0	0	0	0	0	0	0	0	0	0	0	0
139	Luteolin 7-malonylglucoside	O=C(O)CC(=O)OCC1OC(Oc2cc(O)c3c(=O)cc(-c4ccc(O)c(O)c4)oc3c2)C(O)C(O)C1O	0	0	0	0	0	0	0	0	0	0	0	0	0	0	0	0	0	0	0	0	0	0	0	0	0	0	0	0	0	0	0	0	0	0	0	0	0	0	0	0	0	0	0	0	0	0	0
140	Luteolin 6-C-glucoside 8-C-arabinoside	O=c1cc(-c2ccc(O)c(O)c2)oc2c(C3OC(CO)C(O)C(O)C3O)c(O)c(C3OC(CO)C(O)C(O)C3O)c(O)c12	0	0	0	0	0	0	0	0	0	0	0	0	0	0	0	0	0	0	0	0	0	0	0	0	0	0	0	0	0	0	0	0	0	0	0	0	0	0	0	0	0	0	0	0	0	0	0
142	Luteolin 7-O-(2-apiosyl-4-glucosyl-6-malonyl)-glucoside	O=C(O)CC(=O)OCC1OC(Oc2cc(O)c3c(=O)cc(-c4ccc(O)c(O)c4)oc3c2)C(OC2OCC(O)(CO)C2O)C(O)C1OC1OC(CO)C(O)C(O)C1O	0	0	0	0	0	0	0	0	0	0	0	0	0	0	0	0	0	0	0	0	0	0	0	0	0	0	0	0	0	0	0	0	0	0	0	0	0	0	0	0	0	0	0	0	0	0	0
143	Apigenin 6-C-glucoside 8-C-arabinoside	O=c1cc(-c2ccc(O)cc2)oc2c(C3OC(CO)C(O)C3O)c(O)c(C3OC(CO)C(O)C(O)C3O)c(O)c12	0	0	0	0	0	0	0	0	0	0	0	0	0	0	0	0	0	0	0	0	0	0	0	0	0	0	0	0	0	0	0	0	0	0	0	0	0	0	0	0	0	0	0	0	0	0	0
144	Luteolin 7-O-(2-apiosyl-6-malonyl)-glucoside	O=C(O)CC(=O)OCC1OC(Oc2cc(O)c3c(=O)cc(-c4ccc(O)c(O)c4)oc3c2)C(OC2OCC(O)(CO)C2O)C(O)C1O	0	0	0	0	0	0	0	0	0	0	0	0	0	0	0	0	0	0	0	0	0	0	0	0	0	0	0	0	0	0	0	0	0	0	0	0	0	0	0	0	0	0	0	0	0	0	0
146	Jaceosidin	COc1cc(-c2cc(=O)c3c(O)c(OC)c(O)cc3o2)ccc1O	0	0	0	0	0	0	0	0	0	0	0	0	0	0	0	0	0	0	0	0	0	0	0	0	0	0	0	0	0	0	0	0	0	0	0	0	0	0	0	0	0	0	0	0	0	0	0
148	Apigenin 7-O-(6''-malonyl-apiosyl-glucoside)	O=C(O)CC(=O)OCC1OC(OCC2OC(Oc3cc(O)c4c(=O)cc(-c5ccc(O)cc5)oc4c3)C(O)C(O)C2O)C(O)C1O	0	0	0	0	0	0	0	0	0	0	0	0	0	0	0	0	0	0	0	0	0	0	0	0	0	0	0	0	0	0	0	0	0	0	0	0	0	0	0	0	0	0	0	0	0	0	0
150	Chrysoeriol 7-O-(6''-malonyl-apiosyl-glucoside)	COc1cc(-c2cc(=O)c3c(O)cc(OC4OC(COC(=O)CC(=O)O)C(O)C(O)C4OC4OCC(O)(CO)C4O)cc3o2)ccc1O	0	0	0	0	0	0	0	0	0	0	0	0	0	0	0	0	0	0	0	0	0	0	0	0	0	0	0	0	0	0	0	0	0	0	0	0	0	0	0	0	0	0	0	0	0	0	0
152	Apigenin 7-O-diglucuronide	O=C(O)C1OC(OC2C(Oc3cc(O)c4c(=O)cc(-c5ccc(O)cc5)oc4c3)OC(C(=O)O)C(O)C2O)C(O)C(O)C1O	0	0	0	0	0	0	0	0	0	0	0	0	0	0	0	0	0	0	0	0	0	0	0	0	0	0	0	0	0	0	0	0	0	0	0	0	0	0	0	0	0	0	0	0	0	0	0
154	Quercetin 3-O-xylosyl-glucuronide	O=C(OC1OC(CO)C(O)C1O)C1OC(Oc2c(-c3ccc(O)c(O)c3)oc3cc(O)cc(O)c3c2=O)C(O)C(O)C1O	0	0	0	0	0	0	0	0	0	0	0	0	0	0	0	0	0	0	0	0	0	0	0	0	0	0	0	0	0	0	0	0	0	0	0	0	0	0	0	0	0	0	0	0	0	0	0
162	Quercetin 3-O-glucosyl-xyloside	O=c1c(OC2OC(COC3OC(CO)C(O)C3O)C(O)C(O)C2O)c(-c2ccc(O)c(O)c2)oc2cc(O)cc(O)c12	0	0	0	0	0	0	0	0	0	0	0	0	0	0	0	0	0	0	0	0	0	0	0	0	0	0	0	0	0	0	0	0	0	0	0	0	0	0	0	0	0	0	0	0	0	0	0
163	Quercetin 3-O-acetyl-rhamnoside	CC(=O)OC1C(Oc2c(-c3ccc(O)c(O)c3)oc3cc(O)cc(O)c3c2=O)OC(C)C(O)C1O	0	0	0	0	0	0	0	0	0	0	0	0	0	0	0	0	0	0	0	0	0	0	0	0	0	0	0	0	0	0	0	0	0	0	0	0	0	0	0	0	0	0	0	0	0	0	0
164	Kaempferol 3-O-glucosyl-rhamnosyl-galactoside	CC1OC(OCC2OC(Oc3c(-c4ccc(O)cc4)oc4cc(O)cc(O)c4c3=O)C(O)C(O)C2O)C(O)C(OC2OC(CO)C(O)C(O)C2O)C1O	0	0	0	0	0	0	0	0	0	0	0	0	0	0	0	0	0	0	0	0	0	0	0	0	0	0	0	0	0	0	0	0	0	0	0	0	0	0	0	0	0	0	0	0	0	0	0
165	Kaempferol 3-O-glucosyl-rhamnosyl-glucoside	CC1OC(OCC2OC(Oc3c(-c4ccc(O)cc4)oc4cc(O)cc(O)c4c3=O)C(O)C(O)C2O)C(O)C(OC2OC(CO)C(O)C(O)C2O)C1O	0	0	0	0	0	0	0	0	0	0	0	0	0	0	0	0	0	0	0	0	0	0	0	0	0	0	0	0	0	0	0	0	0	0	0	0	0	0	0	0	0	0	0	0	0	0	0
166	Quercetin 3-O-glucosyl-rhamnosyl-galactoside	CC1OC(OCC2OC(Oc3c(-c4ccc(O)c(O)c4)oc4cc(O)cc(O)c4c3=O)C(O)C(O)C2O)C(O)C(OC2OC(CO)C(O)C(O)C2O)C1O	0	0	0	0	0	0	0	0	0	0	0	0	0	0	0	0	0	0	0	0	0	0	0	0	0	0	0	0	0	0	0	0	0	0	0	0	0	0	0	0	0	0	0	0	0	0	0
167	Quercetin 3-O-glucosyl-rhamnosyl-glucoside	CC1OC(OCC2OC(Oc3c(-c4ccc(O)c(O)c4)oc4cc(O)cc(O)c4c3=O)C(O)C(O)C2O)C(O)C(OC2OC(CO)C(O)C(O)C2O)C1O	0	0	0	0	0	0	0	0	0	0	0	0	0	0	0	0	0	0	0	0	0	0	0	0	0	0	0	0	0	0	0	0	0	0	0	0	0	0	0	0	0	0	0	0	0	0	0
168	Quercetin 3-O-rhamnosyl-galactoside	CC1OC(OCC2OC(Oc3c(-c4ccc(O)c(O)c4)oc4cc(O)cc(O)c4c3=O)C(O)C(O)C2O)C(O)C(O)C1O	0	0	0	0	0	0	0	0	0	0	0	0	0	0	0	0	0	0	0	0	0	0	0	0	0	0	0	0	0	0	0	0	0	0	0	0	0	0	0	0	0	0	0	0	0	0	0
169	Kaempferol 3-O-arabinoside	O=c1c(OC2OC(CO)C(O)C2O)c(-c2ccc(O)cc2)oc2cc(O)cc(O)c12	0	0	0	0	0	0	0	0	0	0	0	0	0	0	0	0	0	0	0	0	0	0	0	0	0	0	0	0	0	0	0	0	0	0	0	0	0	0	0	0	0	0	0	0	0	0	0
173	Quercetin 3,4',7-triglucoside	O=c1c(OC2OC(CO)C(O)C(O)C2O)c(-c2ccc(OC3OC(CO)C(O)C(O)C3O)c(O)c2)oc2cc(OC3OC(CO)C(O)C(O)C3O)cc(O)c12	0	0	0	0	0	0	0	0	0	0	0	0	0	0	0	0	0	0	0	0	0	0	0	0	0	0	0	0	0	0	0	0	0	0	0	0	0	0	0	0	0	0	0	0	0	0	0
176	3,7-Dimethylquercetin	COc1cc(O)c2c(=O)c(OC)c(-c3ccc(O)c(O)c3)oc2c1	0	0	0	0	0	0	0	0	0	0	0	0	0	0	0	0	0	0	0	0	0	0	0	0	0	0	0	0	0	0	0	0	0	0	0	0	0	0	0	0	0	0	0	0	0	0	0
178	Quercetin 3-O-diglucoside	O=c1c(OC2OC(COC3OC(CO)C(O)C(O)C3O)C(O)C(O)C2O)c(-c2ccc(O)c(O)c2)oc2cc(O)cc(O)c12	0	0	0	0	0	0	0	0	0	0	0	0	0	0	0	0	0	0	0	0	0	0	0	0	0	0	0	0	0	0	0	0	0	0	0	0	0	0	0	0	0	0	0	0	0	0	0
180	Kaempferol 3-sophorotrioside 7-sophoroside	O=c1c(OC2OC(CO)C(O)C(O)C2OC2OC(CO)C(O)C(O)C2OC2OC(CO)C(O)C(O)C2O)c(-c2ccc(O)cc2)oc2cc(OC3OC(CO)C(O)C(O)C3OC3OC(CO)C(O)C(O)C3O)cc(O)c12	0	0	0	0	0	0	0	0	0	0	0	0	0	0	0	0	0	0	0	0	0	0	0	0	0	0	0	0	0	0	0	0	0	0	0	0	0	0	0	0	0	0	0	0	0	0	0
181	Kaempferol 3-O-sinapoyl-caffeoyl-sophoroside 7-O-glucoside	COc1cc(C=CC(=O)OCC2OC(OC3C(Oc4c(-c5ccc(O)cc5)oc5cc(OC6OC(CO)C(O)C(O)C6O)cc(O)c5c4=O)OC(COC(=O)C=Cc4ccc(O)c(O)c4)C(O)C3O)C(O)C(O)C2O)cc(OC)c1O	0	0	0	0	0	0	0	0	0	0	0	0	0	0	0	0	0	0	0	0	0	0	0	0	0	0	0	0	0	0	0	0	0	0	0	0	0	0	0	0	0	0	0	0	0	0	0
182	Kaempferol 3-O-feruloyl-caffeoyl-sophoroside 7-O-glucoside	COc1cc(C=CC(=O)OCC2OC(OC3C(Oc4c(-c5ccc(O)cc5)oc5cc(OC6OC(CO)C(O)C(O)C6O)cc(O)c5c4=O)OC(COC(=O)C=Cc4ccc(O)c(O)c4)C(O)C3O)C(O)C(O)C2O)ccc1O	0	0	0	0	0	0	0	0	0	0	0	0	0	0	0	0	0	0	0	0	0	0	0	0	0	0	0	0	0	0	0	0	0	0	0	0	0	0	0	0	0	0	0	0	0	0	0
184	Kaempferol 3-O-sinapoyl-sophoroside 7-O-glucoside	COc1cc(C=CC(=O)OCC2OC(Oc3c(-c4ccc(O)cc4)oc4cc(OC5OC(CO)C(O)C(O)C5O)cc(O)c4c3=O)C(OC3OC(CO)C(O)C(O)C3O)C(O)C2O)cc(OC)c1O	0	0	0	0	0	0	0	0	0	0	0	0	0	0	0	0	0	0	0	0	0	0	0	0	0	0	0	0	0	0	0	0	0	0	0	0	0	0	0	0	0	0	0	0	0	0	0
185	Kaempferol 3-O-caffeoyl-sophoroside 7-O-glucoside	O=C(C=Cc1ccc(O)c(O)c1)OCC1OC(Oc2c(-c3ccc(O)cc3)oc3cc(OC4OC(CO)C(O)C(O)C4O)cc(O)c3c2=O)C(OC2OC(CO)C(O)C(O)C2O)C(O)C1O	0	0	0	0	0	0	0	0	0	0	0	0	0	0	0	0	0	0	0	0	0	0	0	0	0	0	0	0	0	0	0	0	0	0	0	0	0	0	0	0	0	0	0	0	0	0	0
186	Kaempferol 3-O-feruloyl-sophoroside 7-O-glucoside	COc1cc(C=CC(=O)OCC2OC(Oc3c(-c4ccc(O)cc4)oc4cc(OC5OC(CO)C(O)C(O)C5O)cc(O)c4c3=O)C(OC3OC(CO)C(O)C(O)C3O)C(O)C2O)ccc1O	0	0	0	0	0	0	0	0	0	0	0	0	0	0	0	0	0	0	0	0	0	0	0	0	0	0	0	0	0	0	0	0	0	0	0	0	0	0	0	0	0	0	0	0	0	0	0
188	Kaempferol 3-O-(6"-malonyl-glucoside)	O=C(O)CC(=O)OCC1OC(Oc2c(-c3ccc(O)cc3)oc3cc(O)cc(O)c3c2=O)C(O)C(O)C1O	0	0	0	0	0	0	0	0	0	0	0	0	0	0	0	0	0	0	0	0	0	0	0	0	0	0	0	0	0	0	0	0	0	0	0	0	0	0	0	0	0	0	0	0	0	0	0
189	Quercetin 3-O-(6"-malonyl-glucoside) 7-O-glucoside	O=C(O)CC(=O)OCC1OC(Oc2c(-c3ccc(O)c(O)c3)oc3cc(OC4OC(CO)C(O)C(O)C4O)cc(O)c3c2=O)C(O)C(O)C1O	0	0	0	0	0	0	0	0	0	0	0	0	0	0	0	0	0	0	0	0	0	0	0	0	0	0	0	0	0	0	0	0	0	0	0	0	0	0	0	0	0	0	0	0	0	0	0
201	Kaempferol 3-O-acetyl-glucoside	CC(=O)OCC1OC(Oc2c(-c3ccc(O)cc3)oc3cc(O)cc(O)c3c2=O)C(O)C(O)C1O	0	0	0	0	0	0	0	0	0	0	0	0	0	0	0	0	0	0	0	0	0	0	0	0	0	0	0	0	0	0	0	0	0	0	0	0	0	0	0	0	0	0	0	0	0	0	0
202	Quercetin 3-O-xylosyl-rutinoside	CC1OC(OCC2OC(Oc3c(-c4ccc(O)c(O)c4)oc4cc(O)cc(O)c4c3=O)C(O)C(O)C2O)C(O)C(OC2OC(CO)C(O)C2O)C1O	0	0	0	0	0	0	0	0	0	0	0	0	0	0	0	0	0	0	0	0	0	0	0	0	0	0	0	0	0	0	0	0	0	0	0	0	0	0	0	0	0	0	0	0	0	0	0
203	Kaempferol 3-O-xylosyl-rutinoside	CC1OC(OC2C(O)C(C)OC(OCC3OC(Oc4c(-c5ccc(O)cc5)oc5cc(O)cc(O)c5c4=O)C(O)C(O)C3O)C2O)C(O)C(O)C1O	0	0	0	0	0	0	0	0	0	0	0	0	0	0	0	0	0	0	0	0	0	0	0	0	0	0	0	0	0	0	0	0	0	0	0	0	0	0	0	0	0	0	0	0	0	0	0
205	Quercetin 3-O-(6''-acetyl-glucoside)	CC(=O)OCC1OC(Oc2c(-c3ccc(O)c(O)c3)oc3cc(O)cc(O)c3c2=O)C(O)C(O)C1O	0	0	0	0	0	0	0	0	0	0	0	0	0	0	0	0	0	0	0	0	0	0	0	0	0	0	0	0	0	0	0	0	0	0	0	0	0	0	0	0	0	0	0	0	0	0	0
207	Kaempferol 3-O-(6''-acetyl-galactoside) 7-O-rhamnoside	CC(=O)OCC1OC(Oc2c(-c3ccc(O)cc3)oc3cc(OC4OC(C)C(O)C(O)C4O)cc(O)c3c2=O)C(O)C(O)C1O	0	0	0	0	0	0	0	0	0	0	0	0	0	0	0	0	0	0	0	0	0	0	0	0	0	0	0	0	0	0	0	0	0	0	0	0	0	0	0	0	0	0	0	0	0	0	0
210	Kaempferol 3-O-(2''-rhamnosyl-galactoside) 7-O-rhamnoside	CC1OC(Oc2cc(O)c3c(=O)c(OC4OC(CO)C(O)C(O)C4OC4OC(C)C(O)C(O)C4O)c(-c4ccc(O)cc4)oc3c2)C(O)C(O)C1O	0	0	0	0	0	0	0	0	0	0	0	0	0	0	0	0	0	0	0	0	0	0	0	0	0	0	0	0	0	0	0	0	0	0	0	0	0	0	0	0	0	0	0	0	0	0	0
211	Kaempferol 3-O-(2''-rhamnosyl-6''-acetyl-galactoside) 7-O-rhamnoside	CC1OC(Oc2cc(O)c3c(=O)c(OC4OC(COC(=O)O)C(O)C(O)C4OC4OC(C)C(O)C(O)C4O)c(-c4ccc(O)cc4)oc3c2)C(O)C(O)C1O	0	0	0	0	0	0	0	0	0	0	0	0	0	0	0	0	0	0	0	0	0	0	0	0	0	0	0	0	0	0	0	0	0	0	0	0	0	0	0	0	0	0	0	0	0	0	0
214	Quercetin 3-O-rhamnosyl-(1->2)-rhamnosyl-(1->6)-glucoside	CC1OC(OC2C(OCC3OC(Oc4c(-c5ccc(O)c(O)c5)oc5cc(O)cc(O)c5c4=O)C(O)C(O)C3O)OC(C)C(O)C2O)C(O)C(O)C1O	0	0	0	0	0	0	0	0	0	0	0	0	0	0	0	0	0	0	0	0	0	0	0	0	0	0	0	0	0	0	0	0	0	0	0	0	0	0	0	0	0	0	0	0	0	0	0
215	Kaempferol 3-O-rhamnosyl-rhamnosyl-glucoside	CC1OC(OC2C(OCC3OC(Oc4c(-c5ccc(O)cc5)oc5cc(O)cc(O)c5c4=O)C(O)C(O)C3O)OC(C)C(O)C2O)C(O)C(O)C1O	0	0	0	0	0	0	0	0	0	0	0	0	0	0	0	0	0	0	0	0	0	0	0	0	0	0	0	0	0	0	0	0	0	0	0	0	0	0	0	0	0	0	0	0	0	0	0
216	Kaempferol 3,7,4'-O-triglucoside	O=c1c(OC2OC(CO)C(O)C(O)C2O)c(-c2ccc(OC3OC(CO)C(O)C(O)C3O)cc2)oc2cc(OC3OC(CO)C(O)C(O)C3O)cc(O)c12	0	0	0	0	0	0	0	0	0	0	0	0	0	0	0	0	0	0	0	0	0	0	0	0	0	0	0	0	0	0	0	0	0	0	0	0	0	0	0	0	0	0	0	0	0	0	0
218	5,4'-Dihydroxy-3,3'-dimethoxy-6:7-methylenedioxyflavone	COc1cc(-c2oc3cc4c(c(O)c3c(=O)c2OC)OCO4)ccc1O	0	0	0	0	0	0	0	0	0	0	0	0	0	0	0	0	0	0	0	0	0	0	0	0	0	0	0	0	0	0	0	0	0	0	0	0	0	0	0	0	0	0	0	0	0	0	0
219	3-Methoxysinensetin	COc1ccc(-c2oc3cc(OC)c(OC)c(OC)c3c(=O)c2OC)cc1OC	0	0	0	0	0	0	0	0	0	0	0	0	0	0	0	0	0	0	0	0	0	0	0	0	0	0	0	0	0	0	0	0	0	0	0	0	0	0	0	0	0	0	0	0	0	0	0
221	Ellagic acid glucoside	O=c1oc2c(O)c(OC3OC(CO)C(O)C(O)C3O)cc3c(=O)oc4c(O)c(O)cc1c4c23	0	0	0	0	0	0	0	0	0	0	0	0	0	0	0	0	0	0	0	0	0	0	0	0	0	0	0	0	0	0	0	0	0	0	0	0	0	0	0	0	0	0	0	0	0	0	0
222	3,4-Dimethoxybenzoic acid	COc1ccc(C(=O)O)cc1OC	0	0	0	0	0	0	0	0	0	0	0	0	0	0	0	0	0	0	0	0	0	0	0	0	0	0	0	0	0	0	0	0	0	0	0	0	0	0	0	0	0	0	0	0	0	0	0
223	Ellagic acid arabinoside	O=c1oc2c(O)c(OC3OCC(O)C(O)C3O)cc3c(=O)oc4c(O)c(O)cc1c4c23	0	0	0	0	0	0	0	0	0	0	0	0	0	0	0	0	0	0	0	0	0	0	0	0	0	0	0	0	0	0	0	0	0	0	0	0	0	0	0	0	0	0	0	0	0	0	0
224	Ellagic acid acetyl-xyloside	CC(=O)OC1COC(Oc2cc3c(=O)oc4c(O)c(O)cc5c(=O)oc(c2O)c3c45)C(O)C1O	0	0	0	0	0	0	0	0	0	0	0	0	0	0	0	0	0	0	0	0	0	0	0	0	0	0	0	0	0	0	0	0	0	0	0	0	0	0	0	0	0	0	0	0	0	0	0
225	Ellagic acid acetyl-arabinoside	CC(=O)OC1COC(Oc2cc3c(=O)oc4c(O)c(O)cc5c(=O)oc(c2O)c3c45)C(O)C1O	0	0	0	0	0	0	0	0	0	0	0	0	0	0	0	0	0	0	0	0	0	0	0	0	0	0	0	0	0	0	0	0	0	0	0	0	0	0	0	0	0	0	0	0	0	0	0
229	Gallic acid 3-O-gallate	O=C(O)c1cc(O)c(O)c(OC(=O)c2cc(O)c(O)c(O)c2)c1	0	0	0	0	0	0	0	0	0	0	0	0	0	0	0	0	0	0	0	0	0	0	0	0	0	0	0	0	0	0	0	0	0	0	0	0	0	1	0	0	0	0	0	0	0	0	0
230	Valoneic acid dilactone	O=C(O)c1cc(O)c(O)c(O)c1Oc1cc2c(=O)oc3c(O)c(O)cc4c(=O)oc(c1O)c2c34	0	0	0	0	0	0	0	0	0	0	0	0	0	0	0	0	0	0	0	0	0	0	0	0	0	0	0	0	0	0	0	0	0	0	0	0	0	1	0	0	0	0	0	0	0	0	0
231	2,6-Dimethoxybenzoic acid	COc1cccc(OC)c1C(=O)O	0	0	0	0	0	0	0	0	0	0	0	0	0	0	0	0	0	0	0	0	0	0	0	0	0	0	0	0	0	0	0	0	0	0	0	0	0	0	0	0	0	0	0	0	0	0	0
232	Sanguisorbic acid dilactone	O=C(O)c1cc(O)c(O)c(Oc2c(O)c(O)c3oc(=O)c4cc(O)c(O)c5oc(=O)c2c3c54)c1	0	0	0	0	0	0	0	0	0	0	0	0	0	0	0	0	0	0	0	0	0	0	0	0	0	0	0	0	0	0	0	0	0	0	0	0	0	0	0	0	0	0	0	0	0	0	0
233	Galloyl glucose	O=C(OC1OC(CO)C(O)C(O)C1O)c1cc(O)c(O)c(O)c1	0	0	0	0	0	0	0	0	0	0	0	0	0	0	0	0	0	0	0	0	0	0	0	0	0	0	0	0	0	0	0	0	0	0	0	0	0	1	0	0	0	0	0	0	0	0	0
234	Lambertianin C	O=C(OC1OC2COC(=O)c3cc(O)c(O)c(O)c3-c3c(cc(O)c(O)c3O)C(=O)OC2C2OC(=O)c3cc(O)c(O)c(O)c3-c3c(cc(O)c(O)c3O)C(=O)OC12)c1cc(O)c(O)c(Oc2c(O)c(O)c(O)c3c2C(=O)OC2C(COC(=O)c4cc(O)c(O)c(O)c4-3)OC(OC(=O)c3cc(O)c(O)c(Oc4c(O)c(O)c(O)c5c4C(=O)OC4C(COC(=O)c6cc(O)c(O)c(O)c6-5)OC(OC(=O)c5cc(O)c(O)c(O)c5)C5OC(=O)c6cc(O)c(O)c(O)c6-c6c(cc(O)c(O)c6O)C(=O)OC45)c3)C3OC(=O)c4cc(O)c(O)c(O)c4-c4c(cc(O)c(O)c4O)C(=O)OC23)c1	0	0	0	0	0	0	0	0	0	0	0	0	0	0	0	0	0	0	0	0	0	0	0	0	0	0	0	0	0	0	0	0	0	0	0	0	0	1	0	0	0	0	0	0	0	0	0
236	5-p-Coumaroylquinic acid	O=C(C=Cc1ccc(O)cc1)OC1CC(O)(C(=O)O)CC(O)C1O	0	0	0	0	0	0	0	0	0	0	0	0	0	0	0	0	0	0	0	0	0	0	0	0	0	0	0	0	0	0	0	0	0	0	0	0	0	0	0	0	0	0	0	0	0	0	0
237	4-p-Coumaroylquinic acid	O=C(C=Cc1ccc(O)cc1)OC1C(O)CC(O)(C(=O)O)CC1O	0	0	0	0	0	0	0	0	0	0	0	0	0	0	0	0	0	0	0	0	0	0	0	0	0	0	0	0	0	0	0	0	0	0	0	0	0	0	0	0	0	0	0	0	0	0	0
238	Feruloyl glucose	COc1cc(C=CC(=O)OC2OC(CO)C(O)C(O)C2O)ccc1O	0	0	0	0	0	0	0	0	0	0	0	0	0	0	0	0	0	0	0	0	0	0	0	0	0	0	0	0	0	0	0	0	0	0	0	0	0	0	0	0	0	0	0	0	0	0	0
240	p-Coumaroylquinic acid	O=C(C=Cc1ccc(O)cc1)OC1CC(O)(C(=O)O)CC(O)C1O	0	0	0	0	0	0	0	0	0	0	0	0	0	0	0	0	0	0	0	0	0	0	0	0	0	0	0	0	0	0	0	0	0	0	0	0	0	0	0	0	0	0	0	0	0	0	0
242	2,5-di-S-Glutathionyl caftaric acid	NC(CCC(=O)NC(CSc1cc(C=CC(=O)OC(C(=O)O)C(O)C(=O)O)c(SCC(NC(=O)CCC(N)C(=O)O)C(=O)NCC(=O)O)c(O)c1O)C(=O)NCC(=O)O)C(=O)O	0	0	0	0	0	0	0	0	0	0	0	0	0	0	0	0	0	0	0	0	0	0	0	0	0	0	0	0	0	0	0	0	1	0	0	0	0	0	0	0	0	0	0	0	0	0	0
243	Caffeic acid ethyl ester	CCOC(=O)C=Cc1ccc(O)c(O)c1	0	0	0	0	0	0	0	0	0	0	0	0	0	0	0	0	0	0	0	0	0	0	0	0	0	0	0	0	0	0	0	0	0	0	0	0	0	0	0	0	0	0	0	0	0	0	0
246	2-S-Glutathionyl caftaric acid	NC(CCC(=O)NC(CSc1c(C=CC(=O)OC(C(=O)O)C(O)C(=O)O)ccc(O)c1O)C(=O)NCC(=O)O)C(=O)O	0	0	0	0	0	0	0	0	0	0	0	0	0	0	0	0	0	0	0	0	0	0	0	0	0	0	0	0	0	0	0	0	1	0	0	0	0	0	0	0	0	0	0	0	0	0	0
247	5-Feruloylquinic acid	COc1cc(C=CC(=O)OC2CC(O)(C(=O)O)CC(O)C2O)ccc1O	0	0	0	0	0	0	0	0	0	0	0	0	0	0	0	0	0	0	0	0	0	0	0	0	0	0	0	0	0	0	0	0	0	0	0	0	0	0	0	0	0	0	0	0	0	0	0
248	4-Feruloylquinic acid	COc1cc(C=CC(=O)OC2C(O)CC(O)(C(=O)O)CC2O)ccc1O	0	0	0	0	0	0	0	0	0	0	0	0	0	0	0	0	0	0	0	0	0	0	0	0	0	0	0	0	0	0	0	0	0	0	0	0	0	0	0	0	0	0	0	0	0	0	0
249	3-Feruloylquinic acid	COc1cc(C=CC(=O)OC2CC(O)(C(=O)O)CC(O)C2O)ccc1O	0	0	0	0	0	0	0	0	0	0	0	0	0	0	0	0	0	0	0	0	0	0	0	0	0	0	0	0	0	0	0	0	0	0	0	0	0	0	0	0	0	0	0	0	0	0	0
250	5-Sinapoylquinic acid	COc1cc(C=CC(=O)OC2CC(O)(C(=O)O)CC(O)C2O)cc(OC)c1O	0	0	0	0	0	0	0	0	0	0	0	0	0	0	0	0	0	0	0	0	0	0	0	0	0	0	0	0	0	0	0	0	0	0	0	0	0	0	0	0	0	0	0	0	0	0	0
251	4-Sinapoylquinic acid	COc1cc(C=CC(=O)OC2C(O)CC(O)(C(=O)O)CC2O)cc(OC)c1O	0	0	0	0	0	0	0	0	0	0	0	0	0	0	0	0	0	0	0	0	0	0	0	0	0	0	0	0	0	0	0	0	0	0	0	0	0	0	0	0	0	0	0	0	0	0	0
252	3-Sinapoylquinic acid	COc1cc(C=CC(=O)OC2CC(O)(C(=O)O)CC(O)C2O)cc(OC)c1O	0	0	0	0	0	0	0	0	0	0	0	0	0	0	0	0	0	0	0	0	0	0	0	0	0	0	0	0	0	0	0	0	0	0	0	0	0	0	0	0	0	0	0	0	0	0	0
256	Ferulic acid 4-glucoside	COc1cc(C=CC(=O)O)ccc1OC1OC(CO)C(O)C(O)C1O	0	0	0	0	0	0	0	0	0	0	0	0	0	0	0	0	0	0	0	0	0	0	0	0	0	0	0	0	0	0	0	0	0	0	0	0	0	0	0	0	0	0	0	0	0	0	0
257	p-Coumaroyl tartaric acid glucosidic ester	O=C(O)C(O)C(O)C(=O)O	0	0	0	0	0	0	0	0	0	0	0	0	0	0	0	0	0	0	0	0	0	0	0	0	0	0	0	0	0	0	0	0	0	0	0	0	0	0	0	0	0	0	0	0	0	0	0
258	p-Coumaric acid ethyl ester	CCOC(=O)C=Cc1ccc(O)cc1	0	0	0	0	0	0	0	0	0	0	0	0	0	0	0	0	0	0	0	0	0	0	0	0	0	0	0	0	0	0	0	0	0	0	0	0	0	0	0	0	0	0	0	0	0	0	0
259	Trans-Caffeoyl tartaric acid	O=C(C=Cc1ccc(O)c(O)c1)OC(C(=O)O)C(O)C(=O)O	0	0	0	0	0	0	0	0	0	0	0	0	0	0	0	0	0	0	0	0	0	0	0	0	0	0	0	0	0	0	0	0	0	0	0	0	0	0	0	0	0	0	0	0	0	0	0
260	Cis-Caffeoyl tartaric acid	O=C(C=Cc1ccc(O)c(O)c1)OC(C(=O)O)C(O)C(=O)O	0	0	0	0	0	0	0	0	0	0	0	0	0	0	0	0	0	0	0	0	0	0	0	0	0	0	0	0	0	0	0	0	0	0	0	0	0	0	0	0	0	0	0	0	0	0	0
262	Hydroxycaffeic acid	O=C(O)C=Cc1ccc(O)c(O)c1O	0	0	0	0	0	0	0	0	0	0	0	0	0	0	0	0	0	0	0	0	0	0	0	0	0	0	0	0	0	0	0	0	0	0	0	0	0	1	0	0	0	0	0	0	0	0	0
263	5-5'-Dehydrodiferulic acid	COc1cc(C=CC(=O)O)cc(-c2cc(C=CC(=O)O)cc(OC)c2O)c1O	0	0	0	0	0	0	0	0	0	0	0	0	0	0	0	0	0	0	0	0	0	0	0	0	0	0	0	0	0	0	0	0	0	0	0	0	0	0	0	0	0	0	0	0	0	0	0
264	5-8'-Dehydrodiferulic acid	COc1cc(C=C(C(=O)O)c2cc(C=CC(=O)O)cc(OC)c2O)ccc1O	0	0	0	0	0	0	0	0	0	0	0	0	0	0	0	0	0	0	0	0	0	0	0	0	0	0	0	0	0	0	0	0	0	0	0	0	0	0	0	0	0	0	0	0	0	0	0
266	1,2-Diferuloylgentiobiose	COc1cc(C=CC(=O)OC2OC(COC3OC(CO)C(O)C(O)C3O)C(O)C(O)C2OC(=O)C=Cc2ccc(O)c(OC)c2)ccc1O	0	0	0	0	0	0	0	0	0	0	0	0	0	0	0	0	0	0	0	0	0	0	0	0	0	0	0	0	0	0	0	0	0	0	0	0	0	0	0	0	0	0	0	0	0	0	0
269	1-Sinapoyl-2,2'-diferuloylgentiobiose	COc1cc(C=CC(=O)OC2C(OCC3OC(OC(=O)C=Cc4cc(OC)c(O)c(OC)c4)C(OC(=O)C=Cc4ccc(O)c(OC)c4)C(O)C3O)OC(CO)C(O)C2O)ccc1O	0	0	0	0	0	0	0	0	0	0	0	0	0	0	0	0	0	0	0	0	0	0	0	0	0	0	0	0	0	0	0	0	0	0	0	0	0	0	0	0	0	0	0	0	0	0	0
270	1,2,2'-Triferuloylgentiobiose	COc1cc(C=CC(=O)OC2OC(COC3OC(CO)C(O)C(O)C3OC(=O)C=Cc3ccc(O)c(OC)c3)C(O)C(O)C2OC(=O)C=Cc2ccc(O)c(OC)c2)ccc1O	0	0	0	0	0	0	0	0	0	0	0	0	0	0	0	0	0	0	0	0	0	0	0	0	0	0	0	0	0	0	0	0	0	0	0	0	0	0	0	0	0	0	0	0	0	0	0
271	8-4'-Dehydrodiferulic acid	COc1cc(C=C(Oc2ccc(C=CC(=O)O)cc2OC)C(=O)O)ccc1O	0	0	0	0	0	0	0	0	0	0	0	0	0	0	0	0	0	0	0	0	0	0	0	0	0	0	0	0	0	0	0	0	0	0	0	0	0	0	0	0	0	0	0	0	0	0	0
272	8-8'-Dehydrodiferulic acid	COc1cc(C=C(C(=O)O)C(=Cc2ccc(O)c(OC)c2)C(=O)O)ccc1O	0	0	0	0	0	0	0	0	0	0	0	0	0	0	0	0	0	0	0	0	0	0	0	0	0	0	0	0	0	0	0	0	0	0	0	0	0	0	0	0	0	0	0	0	0	0	0
273	5-8'-Benzofuran dehydrodiferulic acid	COc1cc(C2Oc3c(OC)cc(C=CC(=O)O)cc3C2C(=O)O)ccc1O	0	0	0	0	0	0	0	0	0	0	0	0	0	0	0	0	0	0	0	0	0	0	0	0	0	0	0	0	0	0	0	0	0	0	0	0	0	0	0	0	0	0	0	0	0	0	0
275	Cis-5-Caffeoylquinic acid	O=C(C=Cc1ccc(O)c(O)c1)OC1CC(O)(C(=O)O)CC(O)C1O	0	0	0	0	0	0	0	0	0	0	0	0	0	0	0	0	0	0	0	0	0	0	0	0	0	0	0	0	0	0	0	0	0	0	0	0	0	0	0	0	0	0	0	0	0	0	0
276	3,4-Diferuloylquinic acid	COc1cc(C=CC(=O)OC2CC(O)(C(=O)O)CC(O)C2OC(=O)C=Cc2ccc(O)c(OC)c2)ccc1O	0	0	0	0	0	0	0	0	0	0	0	0	0	0	0	0	0	0	0	0	0	0	0	0	0	0	0	0	0	0	0	0	0	0	0	0	0	0	0	0	0	0	0	0	0	0	0
277	3,5-Diferuloylquinic acid	COc1cc(C=CC(=O)OC2CC(O)(C(=O)O)CC(OC(=O)C=Cc3ccc(O)c(OC)c3)C2O)ccc1O	0	0	0	0	0	0	0	0	0	0	0	0	0	0	0	0	0	0	0	0	0	0	0	0	0	0	0	0	0	0	0	0	0	0	0	0	0	0	0	0	0	0	0	0	0	0	0
278	1,3-Dicaffeoylquinic acid	O=C(C=Cc1ccc(O)c(O)c1)OC1CC(OC(=O)C=Cc2ccc(O)c(O)c2)(C(=O)O)CC(O)C1O	0	0	0	0	0	0	0	0	0	0	0	0	0	0	0	0	0	0	0	0	0	0	0	0	0	0	0	0	0	0	0	0	0	0	0	0	0	0	0	0	0	0	0	0	0	0	0
279	Dicaffeoylquinic acid	O=C(C=Cc1ccc(O)c(O)c1)OC1CC(O)(C(=O)O)CC(OC(=O)C=Cc2ccc(O)c(O)c2)C1O	0	0	0	0	0	0	0	0	0	0	0	0	0	0	0	0	0	0	0	0	0	0	0	0	0	0	0	0	0	0	0	0	0	0	0	0	0	0	0	0	0	0	0	0	0	0	0
280	b-D-fructosyl-a-D-(6-O-(E))-feruloylglucoside	O=C(C=Cc1ccccc1)OCC1OC(OC2(CO)OC(CO)C(O)C2O)C(O)C(O)C1O	0	0	0	0	0	0	0	0	0	0	0	0	0	0	0	0	0	0	0	0	0	0	0	0	0	0	0	0	0	0	0	0	0	0	0	0	0	0	0	0	0	0	0	0	0	0	0
281	Avenanthramide 1p	O=C(C=Cc1ccc(O)cc1)Nc1ccccc1C(=O)O	0	0	0	0	0	0	0	0	0	0	0	0	0	0	0	0	0	0	0	0	0	0	0	0	0	0	0	0	0	0	0	0	0	0	0	0	0	0	0	0	0	0	0	0	0	0	0
282	Avenanthramide 1f	COc1cc(C=CC(=O)Nc2ccccc2C(=O)O)ccc1O	0	0	0	0	0	0	0	0	0	0	0	0	0	0	0	0	0	0	0	0	0	0	0	0	0	0	0	0	0	0	0	0	0	0	0	0	0	0	0	0	0	0	0	0	0	0	0
283	Avenanthramide 2p	O=C(C=Cc1ccc(O)cc1)Nc1ccc(O)cc1C(=O)O	0	0	0	0	0	0	0	0	0	0	0	0	0	0	0	0	0	0	0	0	0	0	0	0	0	0	0	0	0	0	0	0	0	0	0	0	0	0	0	0	0	0	0	0	0	0	0
284	Avenanthramide 2c	O=C(C=Cc1ccc(O)c(O)c1)Nc1ccc(O)cc1C(=O)O	0	0	0	0	0	0	0	0	0	0	0	0	0	0	0	0	0	0	0	0	0	0	0	0	0	0	0	0	0	0	0	0	0	0	0	0	0	0	0	0	0	0	0	0	0	0	0
285	Avenanthramide 2f	COc1cc(C=CC(=O)Nc2ccc(O)cc2C(=O)O)ccc1O	0	0	0	0	0	0	0	0	0	0	0	0	0	0	0	0	0	0	0	0	0	0	0	0	0	0	0	0	0	0	0	0	0	0	0	0	0	0	0	0	0	0	0	0	0	0	0
286	Avenanthramide 1c	O=C(C=Cc1ccc(O)c(O)c1)Nc1ccccc1C(=O)O	0	0	0	0	0	0	0	0	0	0	0	0	0	0	0	0	0	0	0	0	0	0	0	0	0	0	0	0	0	0	0	0	0	0	0	0	0	0	0	0	0	0	0	0	0	0	0
287	Avenanthramide 1s	COc1cc(C=CC(=O)Nc2ccccc2C(=O)O)cc(OC)c1O	0	0	0	0	0	0	0	0	0	0	0	0	0	0	0	0	0	0	0	0	0	0	0	0	0	0	0	0	0	0	0	0	0	0	0	0	0	0	0	0	0	0	0	0	0	0	0
288	Avenanthramide 2s	COc1cc(C=CC(=O)Nc2ccc(O)cc2C(=O)O)cc(OC)c1O	0	0	0	0	0	0	0	0	0	0	0	0	0	0	0	0	0	0	0	0	0	0	0	0	0	0	0	0	0	0	0	0	0	0	0	0	0	0	0	0	0	0	0	0	0	0	0
290	p-Coumaroyl glycolic acid	O=C(O)COC(=O)C=Cc1ccc(O)cc1	0	0	0	0	0	0	0	0	0	0	0	0	0	0	0	0	0	0	0	0	0	0	0	0	0	0	0	0	0	0	0	0	0	0	0	0	0	0	0	0	0	0	0	0	0	0	0
291	3-Caffeoyl-1,5-quinolactone	O=C(C=Cc1ccc(O)c(O)c1)OC1CC2(O)CC(OC2=O)C1O	0	0	0	0	0	0	0	0	0	0	0	0	0	0	0	0	0	0	0	0	0	0	0	0	0	0	0	0	0	0	0	0	0	0	0	0	0	0	0	0	0	0	0	0	0	0	0
292	4-Caffeoyl-1,5-quinolactone	O=C(C=Cc1ccc(O)c(O)c1)OC1C(O)CC2(O)CC1OC2=O	0	0	0	0	0	0	0	0	0	0	0	0	0	0	0	0	0	0	0	0	0	0	0	0	0	0	0	0	0	0	0	0	0	0	0	0	0	0	0	0	0	0	0	0	0	0	0
293	3-Feruloyl-1,5-quinolactone	COc1cc(C=CC(=O)OC2CC3(O)CC(OC3=O)C2O)ccc1O	0	0	0	0	0	0	0	0	0	0	0	0	0	0	0	0	0	0	0	0	0	0	0	0	0	0	0	0	0	0	0	0	0	0	0	0	0	0	0	0	0	0	0	0	0	0	0
294	4-Feruloyl-1,5-quinolactone	COc1cc(C=CC(=O)OC2C(O)CC3(O)CC2OC3=O)ccc1O	0	0	0	0	0	0	0	0	0	0	0	0	0	0	0	0	0	0	0	0	0	0	0	0	0	0	0	0	0	0	0	0	0	0	0	0	0	0	0	0	0	0	0	0	0	0	0
295	3,4-Dicaffeoyl-1,5-quinolactone	O=C(C=Cc1ccc(O)c(O)c1)OC1CC2(O)CC(OC2=O)C1OC(=O)C=Cc1ccc(O)c(O)c1	0	0	0	0	0	0	0	0	0	0	0	0	0	0	0	0	0	0	0	0	0	0	0	0	0	0	0	0	0	0	0	0	0	0	0	0	0	0	0	0	0	0	0	0	0	0	0
296	3-p-Coumaroyl-1,5-quinolactone	O=C(C=Cc1ccc(O)cc1)OC1CC2(O)CC(OC2=O)C1O	0	0	0	0	0	0	0	0	0	0	0	0	0	0	0	0	0	0	0	0	0	0	0	0	0	0	0	0	0	0	0	0	0	0	0	0	0	0	0	0	0	0	0	0	0	0	0
297	4-p-Coumaroyl-1,5-quinolactone	O=C(C=Cc1ccc(O)cc1)OC1C(O)CC2(O)CC1OC2=O	0	0	0	0	0	0	0	0	0	0	0	0	0	0	0	0	0	0	0	0	0	0	0	0	0	0	0	0	0	0	0	0	0	0	0	0	0	0	0	0	0	0	0	0	0	0	0
298	Caffeoyl aspartic acid	O=C(O)CC(NC(=O)C=Cc1ccc(O)c(O)c1)C(=O)O	0	0	0	0	0	0	0	0	0	0	0	0	0	0	0	0	0	0	0	0	0	0	0	0	0	0	0	0	0	0	0	0	0	0	0	0	0	0	0	0	0	0	0	0	0	0	0
299	p-Coumaroyl aspartic acid	O=C(O)CC(NC(=O)C=Cc1ccc(O)cc1)C(=O)O	0	0	0	0	0	0	0	0	0	0	0	0	0	0	0	0	0	0	0	0	0	0	0	0	0	0	0	0	0	0	0	0	0	0	0	0	0	0	0	0	0	0	0	0	0	0	0
301	Caffeoyl tyrosine	O=C(C=Cc1ccc(O)c(O)c1)NC(Cc1ccc(O)cc1)C(=O)O	0	0	0	0	0	0	0	0	0	0	0	0	0	0	0	0	0	0	0	0	0	0	0	0	0	0	0	0	0	0	0	0	0	0	0	0	0	0	0	0	0	0	0	0	0	0	0
302	p-Coumaroyl 3-hydroxytyrosine	O=C(C=Cc1ccc(O)cc1)NC(Cc1ccc(O)c(O)c1)C(=O)O	0	0	0	0	0	0	0	0	0	0	0	0	0	0	0	0	0	0	0	0	0	0	0	0	0	0	0	0	0	0	0	0	0	0	0	0	0	0	0	0	0	0	0	0	0	0	0
303	Avenanthramide A2	COc1cc(C=CC(=O)Nc2cc(OC)c(O)cc2C(O)O)ccc1O	0	0	0	0	0	0	0	0	0	0	0	0	0	0	0	0	0	0	0	0	0	0	0	0	0	0	0	0	0	0	0	0	0	0	0	0	0	0	0	0	0	0	0	0	0	0	0
304	Avenanthramide K	O=C(C=Cc1ccc(O)c(O)c1)Nc1cc(O)ccc1C(=O)O	0	0	0	0	0	0	0	0	0	0	0	0	0	0	0	0	0	0	0	0	0	0	0	0	0	0	0	0	0	0	0	0	0	0	0	0	0	0	0	0	0	0	0	0	0	0	0
306	4-8',5'-5''-Dehydrotriferulic acid	COc1cc(C=CC(=O)O)ccc1OC(=Cc1cc(OC)c(O)c(-c2cc(C=CC(=O)O)cc(OC)c2O)c1)C(=O)O	0	0	0	0	0	0	0	0	0	0	0	0	0	0	0	0	0	0	0	0	0	0	0	0	0	0	0	0	0	0	0	0	0	0	0	0	0	0	0	0	0	0	0	0	0	0	0
307	24-Methylcholestanol ferulate	COc1cc(C=CC(=O)OC2CCC3(C)C(CCC4C3CCC3(C)C(C(C)CCC(C)C(C)C)CCC43)C2)ccc1O	0	0	0	0	0	0	0	0	0	0	0	0	0	0	0	0	0	0	0	0	0	0	0	0	0	0	0	0	0	0	0	0	0	0	0	0	0	0	0	0	0	0	0	0	0	0	0
308	24-Methylcholesterol ferulate	COc1cc(C=CC(=O)OC2CCC3(C)C(=CCC4C3CCC3(C)C(C(C)CCC(C)C(C)C)CCC43)C2)ccc1O	0	0	0	0	0	0	0	0	0	0	0	0	0	0	0	0	0	0	0	0	0	0	0	0	0	0	0	0	0	0	0	0	0	0	0	0	0	0	0	0	0	0	0	0	0	0	0
309	24-Methyllathosterol ferulate	COc1cc(C=CC(=O)OC2CCC3(C)C(CC=C4C3CCC3(C)C4CCC3C(C)CCC(C)C(C)C)C2)ccc1O	0	0	0	0	0	0	0	0	0	0	0	0	0	0	0	0	0	0	0	0	0	0	0	0	0	0	0	0	0	0	0	0	0	0	0	0	0	0	0	0	0	0	0	0	0	0	0
312	Schottenol 3-ferulate	CCC(CCC(C)C1CCC2C3=CCC4CC(OC(=O)C=Cc5ccc(O)c(OC)c5)CCC4(C)C3CCC21C)C(C)C	0	0	0	0	0	0	0	0	0	0	0	0	0	0	0	0	0	0	0	0	0	0	0	0	0	0	0	0	0	0	0	0	0	0	0	0	0	0	0	0	0	0	0	0	0	0	0
313	24-Methylenecholestanol ferulate	C=C(CCC(C)C1CCC2C3CCC4CC(OC(=O)C=Cc5ccc(O)c(OC)c5)CCC4(C)C3CCC12C)C(C)C	0	0	0	0	0	0	0	0	0	0	0	0	0	0	0	0	0	0	0	0	0	0	0	0	0	0	0	0	0	0	0	0	0	0	0	0	0	0	0	0	0	0	0	0	0	0	0
316	3,4-Dihydroxyphenylacetic acid	O=C(O)Cc1ccc(O)c(O)c1	0	0	0	0	0	0	0	0	0	0	0	0	0	0	0	0	0	0	0	0	0	0	0	0	0	0	0	0	0	0	0	0	0	0	0	0	0	0	0	0	0	0	0	0	0	0	0
317	Homoveratric acid	COc1ccc(CC(=O)O)cc1OC	0	0	0	0	0	0	0	0	0	0	0	0	0	0	0	0	0	0	0	0	0	0	0	0	0	0	0	0	0	0	0	0	0	0	0	0	0	0	0	0	0	0	0	0	0	0	0
318	Methoxyphenylacetic acid	COC(C(=O)O)c1ccccc1	0	0	0	0	0	0	0	0	0	0	0	0	0	0	0	0	0	0	0	0	0	0	0	0	0	0	0	0	0	0	0	0	0	0	0	0	0	0	0	0	0	0	0	0	0	0	0
319	delta-Viniferin	Oc1ccc(C2Oc3ccc(C=Cc4cc(O)cc(O)c4)cc3C2c2cc(O)cc(O)c2)cc1	0	0	0	0	0	0	0	0	0	0	0	0	0	0	0	0	0	0	0	0	0	0	0	0	0	0	0	0	0	0	0	0	0	0	0	0	0	0	0	0	0	0	0	0	0	0	0
324	Sesamolinol 4'-O-b-D-glucosyl (1->6)-O-b-D-glucoside	COc1cc(OC2OCC3C(c4ccc5c(c4)OCO5)OCC23)ccc1OC1OC(COC2OC(CO)C(O)C(O)C2O)C(O)C(O)C1O	0	0	0	0	0	0	0	0	0	0	0	0	0	0	0	0	0	0	0	0	0	0	0	0	0	0	0	0	0	0	0	0	0	0	0	0	0	0	0	0	0	0	0	0	0	0	0
325	7-Hydroxymatairesinol	COc1cc(CC2COC(=O)C2C(O)c2ccc(O)c(OC)c2)ccc1O	0	0	0	0	0	0	0	0	0	0	0	0	0	0	0	0	0	0	0	0	0	0	0	0	0	0	0	0	0	0	0	0	0	0	0	0	0	0	0	0	0	0	0	0	0	0	0
326	Isohydroxymatairesinol	COc1cc(CC2C(=O)OC(c3ccc(O)c(OC)c3)C2CO)ccc1O	0	0	0	0	0	0	0	0	0	0	0	0	0	0	0	0	0	0	0	0	0	0	0	0	0	0	0	0	0	0	0	0	0	0	0	0	0	0	0	0	0	0	0	0	0	0	0
327	Secoisolariciresinol-sesquilignan	COc1cc(CC(CO)C(CO)Cc2ccc(OC(CO)C(O)c3ccc(O)c(OC)c3)c(OC)c2)ccc1O	0	0	0	0	0	0	0	0	0	0	0	0	0	0	0	0	0	0	0	0	0	0	0	0	0	0	0	0	0	0	0	0	0	0	0	0	0	0	0	0	0	0	0	0	0	0	0
328	Cyclolariciresinol	COc1cc(C2c3cc(O)c(OC)cc3CC(CO)C2CO)ccc1O	0	0	0	0	0	0	0	0	0	0	0	0	0	0	0	0	0	0	0	0	0	0	0	0	0	0	0	0	0	0	0	0	0	0	0	0	0	0	0	0	0	0	0	0	0	0	0
329	7-Oxomatairesinol	COc1cc(CC2COC(=O)C2C(=O)c2ccc(O)c(OC)c2)ccc1O	0	0	0	0	0	0	0	0	0	0	0	0	0	0	0	0	0	0	0	0	0	0	0	0	0	0	0	0	0	0	0	0	0	0	0	0	0	0	0	0	0	0	0	0	0	0	0
330	Todolactol A	COc1cc(CC2C(O)OCC2C(O)c2ccc(O)c(OC)c2)ccc1O	0	0	0	0	0	0	0	0	0	0	0	0	0	0	0	0	0	0	0	0	0	0	0	0	0	0	0	0	0	0	0	0	0	0	0	0	0	0	0	0	0	0	0	0	0	0	0
331	Conidendrin	COc1cc(C2c3cc(O)c(OC)cc3CC3C(=O)OCC32)ccc1O	0	0	0	0	0	0	0	0	0	0	0	0	0	0	0	0	0	0	0	0	0	0	0	0	0	0	0	0	0	0	0	0	0	0	0	0	0	0	0	0	0	0	0	0	0	0	0
332	7-Hydroxysecoisolariciresinol	CCC(Cc1ccc(O)c(OC)c1)C(CC)C(O)c1ccc(O)c(OC)c1	0	0	0	0	0	0	0	0	0	0	0	0	0	0	0	0	0	0	0	0	0	0	0	0	0	0	0	0	0	0	0	0	0	0	0	0	0	0	0	0	0	0	0	0	0	0	0
333	Lariciresinol-sesquilignan	COc1cc(CC2COC(c3ccc(OC(CO)C(O)c4ccc(O)c(OC)c4)c(OC)c3)C2CO)ccc1O	0	0	0	0	0	0	0	0	0	0	0	0	0	0	0	0	0	0	0	0	0	0	0	0	0	0	0	0	0	0	0	0	0	0	0	0	0	0	0	0	0	0	0	0	0	0	0
334	Episesaminol	Oc1cc2c(cc1C1OCC3C(c4ccc5c(c4)OCO5)OCC13)OCO2	0	0	0	0	0	0	0	0	0	0	0	0	0	0	0	0	0	0	0	0	0	0	0	0	0	0	0	0	0	0	0	0	0	0	0	0	0	0	0	0	0	0	0	0	0	0	0
336	4-Vinylsyringol	COc1cc(C=Cc2ccccc2)cc(O)c1O	0	0	0	0	0	0	0	0	0	0	0	0	0	0	0	0	0	0	0	0	0	0	0	0	0	0	0	0	0	0	0	0	0	0	0	0	0	0	0	0	0	0	0	0	0	0	0
337	Mellein	CC1Cc2cccc(O)c2C(=O)O1	0	0	0	0	0	0	0	0	0	0	0	0	0	0	0	0	0	0	0	0	0	0	0	0	0	0	0	0	0	0	0	0	0	0	0	0	0	0	0	0	0	0	0	0	0	0	0
338	2-Methoxy-5-prop-1-enylphenol	CC=Cc1ccc(OC)c(O)c1	0	0	0	0	0	0	0	0	0	0	0	0	0	0	0	0	0	0	0	0	0	0	0	0	0	0	0	0	0	0	0	0	0	0	0	0	0	0	0	0	0	0	0	0	0	0	0
339	p-Anisidine	COc1ccc(N)cc1	0	0	0	0	0	0	0	0	0	0	0	0	0	0	0	0	0	0	0	0	0	0	0	0	0	0	0	0	0	0	0	0	0	0	0	0	0	0	0	0	0	0	0	0	0	0	0
340	1,4-Naphtoquinone	O=C1C=CC(=O)c2ccccc21	0	0	0	0	0	0	0	0	0	0	0	0	0	0	0	0	0	0	0	0	0	0	0	0	0	0	0	0	0	0	0	0	0	0	0	0	0	0	0	0	0	0	0	0	0	0	0
341	5,5',6,6'-Tetrahydroxy-3,3'-biindolyl	Oc1cc2[nH]cc(-c3c[nH]c4cc(O)c(O)cc34)c2cc1O	0	0	0	0	0	0	0	0	0	0	0	0	0	0	0	0	0	0	0	0	0	0	0	0	0	0	0	0	0	0	0	0	0	0	0	0	0	0	0	0	0	0	0	0	0	0	0
342	1-Phenyl-6,7-dihydroxy-isochroman	Oc1cc2c(c(-c3ccccc3)c1O)COCC2	0	0	0	0	0	0	0	0	0	0	0	0	0	0	0	0	0	0	0	0	0	0	0	0	0	0	0	0	0	0	0	0	0	0	0	0	0	0	0	0	0	0	0	0	0	0	0
343	1-(3-methoxy-4-hydroxy)-phenyl-6,7-dihydroxy-isochroman	COc1cc(-c2c(O)c(O)cc3c2COCC3)ccc1O	0	0	0	0	0	0	0	0	0	0	0	0	0	0	0	0	0	0	0	0	0	0	0	0	0	0	0	0	0	0	0	0	0	0	0	0	0	0	0	0	0	0	0	0	0	0	0
344	Hydroxytyrosol acetate	CC(=O)OCCc1ccc(O)c(O)c1	0	0	0	0	0	0	0	0	0	0	0	0	0	0	0	0	0	0	0	0	0	0	0	0	0	0	0	0	0	0	0	0	0	0	0	0	0	0	0	0	0	0	0	0	0	0	0
345	p-HPEA-AC	CC(=O)OCCc1ccc(O)cc1	0	0	0	0	0	0	0	0	0	0	0	0	0	0	0	0	0	0	0	0	0	0	0	0	0	0	0	0	0	0	0	0	0	0	0	0	0	0	0	0	0	0	0	0	0	0	0
346	3,4-DHPEA-EA	CC=C1C(O)OC=C(C(=O)OC)C1CC(=O)OCCc1ccc(O)c(O)c1	0	0	0	0	0	0	0	0	0	0	0	0	0	0	0	0	0	0	0	0	0	0	0	0	0	0	0	0	0	0	0	0	0	0	0	0	0	0	0	0	0	0	0	0	0	0	0
349	p-HPEA-EDA	CC=C(C=O)C(CC=O)CC(=O)OCCc1ccc(O)cc1	0	0	0	0	0	0	0	0	0	0	0	0	0	0	0	0	0	0	0	0	0	0	0	0	0	0	0	0	0	0	0	0	0	0	0	0	0	0	0	0	0	0	0	0	0	0	0
350	p-HPEA-EA	CC=C(C=O)C(CC=O)CC(=O)OCCc1ccc(O)cc1	0	0	0	0	0	0	0	0	0	0	0	0	0	0	0	0	0	0	0	0	0	0	0	0	0	0	0	0	0	0	0	0	0	0	0	0	0	0	0	0	0	0	0	0	0	0	0
351	Oleuropein-aglycone	CC=C1C(O)OC=C(C(=O)OC)C1CC(=O)OCCc1ccc(O)c(O)c1	0	0	0	0	0	0	0	0	0	0	0	0	0	0	0	0	0	0	0	0	0	0	0	0	0	0	0	0	0	0	0	0	0	0	0	0	0	0	0	0	0	0	0	0	0	0	0
352	Ligstroside-aglycone	CC=C1C(O)OC=C(C(=O)OC)C1CC(=O)OCCc1ccc(O)cc1	0	0	0	0	0	0	0	0	0	0	0	0	0	0	0	0	0	0	0	0	0	0	0	0	0	0	0	0	0	0	0	0	0	0	0	0	0	0	0	0	0	0	0	0	0	0	0
355	5-Pentacosenylresorcinol	CCCCCCCCCCCCCCCCCCCCCCCC=Cc1cc(O)cc(O)c1	0	0	0	0	0	0	0	0	0	0	0	0	0	0	0	0	0	0	0	0	0	0	0	0	0	0	0	0	0	0	0	1	0	0	0	0	0	0	0	0	0	0	0	0	0	0	0
356	5-Tricosenylresorcinol	CCCCCCCCCCCCCCCCCCCCCC=Cc1cc(O)cc(O)c1	0	0	0	0	0	0	0	0	0	0	0	0	0	0	0	0	0	0	0	0	0	0	0	0	0	0	0	0	0	0	0	1	0	0	0	0	0	0	0	0	0	0	0	0	0	0	0
357	3-Methylcatechol	Cc1cccc(O)c1O	0	0	0	0	0	0	0	0	0	0	0	0	0	0	0	0	0	0	0	0	0	0	0	0	0	0	0	0	0	0	0	0	0	0	0	0	0	0	0	0	0	0	0	0	0	0	0
358	4-Ethylphenol	CCc1ccc(O)cc1	0	0	0	0	0	0	0	0	0	0	0	0	0	0	0	0	0	0	0	0	0	0	0	0	0	0	0	0	0	0	0	0	0	0	0	0	0	0	0	0	0	0	0	0	0	0	0
359	3'-Methoxyacetophenone	COc1cccc(C(C)=O)c1	0	0	0	0	0	0	0	0	0	0	0	0	0	0	0	0	0	0	0	0	0	0	0	0	0	0	0	0	0	0	0	0	0	0	0	0	0	0	0	0	0	0	0	0	0	0	0
360	2,3-Dihydroxy-1-guaiacylpropanone	COc1cc(C(=O)C(O)CO)ccc1O	0	0	0	0	0	0	0	0	0	0	0	0	0	0	0	0	0	0	0	0	0	0	0	0	0	0	0	0	0	0	0	0	0	0	0	0	0	0	0	0	0	0	0	0	0	0	0
361	Nuatigenin	CC1C2C(CC3C4CC=C5CC(O)CCC5(C)C4CCC32C)OC12CCC(C)(CO)O2	0	0	0	0	0	0	0	0	0	0	0	0	0	0	0	0	0	0	0	0	0	0	0	0	0	0	0	0	0	0	0	0	0	0	0	0	0	0	0	0	0	0	0	0	0	0	0
362	Estradiol	CC12CCC3c4ccc(O)cc4CCC3C1CCC2O	0	0	0	0	0	0	0	0	0	0	0	0	0	0	0	0	0	0	0	0	0	0	0	0	0	0	0	0	0	0	0	0	0	0	0	0	0	0	0	0	0	0	0	0	0	0	0
363	4',7-Dihydroxy-2',5-dimethoxyisoflavone	COc1cc(O)ccc1-c1coc2cc(O)cc(OC)c2c1=O	0	0	0	0	0	0	0	0	0	0	0	0	0	0	0	0	0	0	0	0	0	0	0	0	0	0	0	0	0	0	0	0	0	0	0	0	0	0	0	0	0	0	0	0	0	0	0
364	Hexamethylquercetagetin	COc1ccc(-c2oc3cc(OC)c(OC)c(OC)c3c(=O)c2OC)cc1OC	0	0	0	0	0	0	0	0	0	0	0	0	0	0	0	0	0	0	0	0	0	0	0	0	0	0	0	0	0	0	0	0	0	0	0	0	0	0	0	0	0	0	0	0	0	0	0
365	Diosgenin 3-[glucosyl-(1->4)-rhamnosyl-(1->4)-[rhamnosyl-(1->2)]-glucoside]	CC1CCC2(OC1)OC1CC3C4CC=C5CC(OC6OC(CO)C(OC7OC(C)C(OC8OC(CO)C(O)C(O)C8O)C(O)C7O)C(O)C6OC6OC(C)C(O)C(O)C6O)CCC5(C)C4CCC3(C)C1C2C	0	0	0	0	0	0	0	0	0	0	0	0	0	0	0	0	0	0	0	0	0	0	0	0	0	0	0	0	0	0	0	0	0	0	0	0	0	0	0	0	0	0	0	0	0	0	0
366	Dioscin	CC1CCC2(OC1)OC1CC3C4CC=C5CC(OC6OC(CO)C(OC7OC(C)C(O)C(O)C7OC7OC(C)C(O)C(O)C7O)C(O)C6O)CCC5(C)C4CCC3(C)C1C2C	0	0	0	0	0	0	0	0	0	0	0	0	0	0	0	0	0	0	0	0	0	0	0	0	0	0	0	0	0	0	0	0	0	0	0	0	0	0	0	0	0	0	0	0	0	0	0
367	Collettiside I	CC1CCC2(OC1)OC1CC3C4CC=C5CC(OC6OC(CO)C(O)C(O)C6O)CCC5(C)C4CCC3(C)C1C2C	0	0	0	0	0	0	0	0	0	0	0	0	0	0	0	0	0	0	0	0	0	0	0	0	0	0	0	0	0	0	0	0	0	0	0	0	0	0	0	0	0	0	0	0	0	0	0
368	Deltonin	CC1CCC2(OC1)OC1CC3C4CC=C5CC(OC6OC(CO)C(OC7OC(CO)C(O)C(O)C7O)C(O)C6OC6OC(C)C(O)C(O)C6O)CCC5(C)C4CCC3(C)C1C2C	0	0	0	0	0	0	0	0	0	0	0	0	0	0	0	0	0	0	0	0	0	0	0	0	0	0	0	0	0	0	0	0	0	0	0	0	0	0	0	0	0	0	0	0	0	0	0
369	Yamogenin	CC1CCC2(OC1)OC1CC3C4CC=C5CC(O)CCC5(C)C4CCC3(C)C1C2C	0	0	0	0	0	0	0	0	0	0	0	0	0	0	0	0	0	0	0	0	0	0	0	0	0	0	0	0	0	0	0	0	0	0	0	0	0	0	0	0	0	0	0	0	0	0	0
370	Ophiopogonin C'	CC1CCC2(OC1)OC1CC3C4CC=C5CC(OC6OC(CO)C(O)C(O)C6OC6OC(C)C(O)C(O)C6O)CCC5(C)C4CCC3(C)C1C2C	0	0	0	0	0	0	0	0	0	0	0	0	0	0	0	0	0	0	0	0	0	0	0	0	0	0	0	0	0	0	0	0	0	0	0	0	0	0	0	0	0	0	0	0	0	0	0
371	Erythritol	OCC(O)C(O)CO	0	0	0	0	0	0	0	0	0	0	0	0	0	0	0	0	0	0	0	0	0	0	0	0	0	0	0	0	0	0	0	0	0	0	0	0	0	0	0	0	0	0	0	0	0	0	0
372	Canescein	CC1OC(OC2CCC3(C=O)C4C(O)CC5(C)C(C6=CC(=O)OC6)CCC5(O)C4CCC3(O)C2)C(O)C(O)C1O	0	0	0	0	0	0	0	0	0	0	0	0	0	0	0	0	0	0	0	0	0	0	0	0	0	0	0	0	0	0	0	0	0	0	0	0	0	0	0	0	0	0	0	0	0	0	0
373	Prenyl acetate	CC(=O)OCC=C(C)C	0	0	0	0	0	0	0	0	0	0	0	0	0	0	0	0	0	0	0	0	0	0	0	0	0	0	0	0	0	0	0	0	0	0	0	0	0	0	0	0	0	0	0	0	0	0	0
374	Phytic acid	O=P(O)(O)OC1C(OP(=O)(O)O)C(OP(=O)(O)O)C(OP(=O)(O)O)C(OP(=O)(O)O)C1OP(=O)(O)O	0	0	0	0	0	0	0	0	0	0	0	0	0	0	0	0	0	0	0	0	0	0	0	0	0	0	0	0	0	0	0	0	1	0	0	0	0	0	0	0	0	0	0	0	0	0	0
375	Asparagoside B	CC(CCC1(O)OC2CC3C4CCC5CC(O)CCC5(C)C4CCC3(C)C2C1C)COC1OC(CO)C(O)C(O)C1O	0	0	0	0	0	0	0	0	0	0	0	0	0	0	0	0	0	0	0	0	0	0	0	0	0	0	0	0	0	0	0	0	0	0	0	0	0	0	0	0	0	0	0	0	0	0	0
376	6-Hydroxykaempferol	O=c1c(O)c(-c2ccc(O)cc2)oc2cc(O)c(O)c(O)c12	0	0	0	0	0	0	0	0	0	0	0	0	0	0	0	0	0	0	0	0	0	0	0	0	0	0	0	0	0	0	0	0	0	0	0	0	0	1	0	0	0	0	0	0	0	0	0
377	(3beta,5alpha)-Ergosta-7,23-dien-3-ol	CC(=CCC(C)C1CCC2C3=CCC4CC(O)CCC4(C)C3CCC21C)C(C)C	0	0	0	0	0	0	0	0	0	0	0	0	0	0	0	0	0	0	0	0	0	0	0	0	0	0	0	0	0	0	0	0	0	0	0	0	0	0	0	0	0	0	0	0	0	0	0
378	Angelicolide	CCCC1C(CCC)C2(OC(=O)C3=C2CCC=C3)C12OC(=O)C1=C2CCC=C1	0	0	0	0	0	0	0	0	0	0	0	0	0	0	0	0	0	0	0	0	0	0	0	0	0	0	0	0	0	0	0	0	0	0	0	0	0	0	0	0	0	0	0	0	0	0	0
379	L-Malic acid caffeate	O=C(O)CC(OC(=O)C=Cc1ccc(O)c(O)c1)C(=O)O	0	0	0	0	0	0	0	0	0	0	0	0	0	0	0	0	0	0	0	0	0	0	0	0	0	0	0	0	0	0	0	0	0	0	0	0	0	0	0	0	0	0	0	0	0	0	0
380	1-Methoxyphaseollidin	COc1cc(O)cc2c1C1Oc3c(ccc(O)c3CC=C(C)C)C1CO2	0	0	0	0	0	0	0	0	0	0	0	0	0	0	0	0	0	0	0	0	0	0	0	0	0	0	0	0	0	0	0	0	0	0	0	0	0	0	0	0	0	0	0	0	0	0	0
381	(3beta,5alpha,6alpha)-Cholest-8-ene-3,6-diol	CC(C)CCCC(C)C1CCC2C3=C(CCC21C)C1(C)CCC(O)CC1C(O)C3	0	0	0	0	0	0	0	0	0	0	0	0	0	0	0	0	0	0	0	0	0	0	0	0	0	0	0	0	0	0	0	0	0	0	0	0	0	0	0	0	0	0	0	0	0	0	0
382	Asparagoside F	CC1CCC2(OC1)OC1CC3C4CCC5CC(OC6OC(CO)C(OC7OC(CO)C(OC8OCC(O)C(O)C8O)C(O)C7O)C(OC7OC(CO)C(O)C(O)C7O)C6O)CCC5(C)C4CCC3(C)C1C2C	0	0	0	0	0	0	0	0	0	0	0	0	0	0	0	0	0	0	0	0	0	0	0	0	0	0	0	0	0	0	0	0	0	0	0	0	0	0	0	0	0	0	0	0	0	0	0
383	1-Hydroxy-3-methoxy-10-methylacridone	COc1cc(O)c2c(=O)c3ccccc3n(C)c2c1	0	0	0	0	0	0	0	0	0	0	0	0	0	0	0	0	0	0	0	0	0	0	0	0	0	0	0	0	0	0	0	0	0	0	0	0	0	0	0	0	0	0	0	0	0	0	0
384	Citpressine I	COc1cc(O)c2c(=O)c3ccc(O)c(OC)c3n(C)c2c1	0	0	0	0	0	0	0	0	0	0	0	0	0	0	0	0	0	0	0	0	0	0	0	0	0	0	0	0	0	0	0	0	0	0	0	0	0	0	0	0	0	0	0	0	0	0	0
385	Citpressine II	COc1cc(O)c2c(=O)c3ccc(OC)c(OC)c3n(C)c2c1	0	0	0	0	0	0	0	0	0	0	0	0	0	0	0	0	0	0	0	0	0	0	0	0	0	0	0	0	0	0	0	0	0	0	0	0	0	0	0	0	0	0	0	0	0	0	0
386	3,6-Ditigloyloxytropan-7-ol	CC=C(C)C(=O)OC1CC2C(O)C(OC(=O)C(C)=CC)C(C1)N2C	0	0	0	0	0	0	0	0	0	0	0	0	0	0	0	0	0	0	0	0	0	0	0	0	0	0	0	0	0	0	0	0	0	0	0	0	0	0	0	0	0	0	0	0	0	0	0
387	Gravacridonediol	Cn1c2ccccc2c(=O)c2c(O)cc3c(c21)CC(C(C)(O)CO)O3	0	0	0	0	0	0	0	0	0	0	0	0	0	0	0	0	0	0	0	0	0	0	0	0	0	0	0	0	0	0	0	0	0	0	0	0	0	0	0	0	0	0	0	0	0	0	0
388	Gravacridonediol methyl ether	COCC(C)(O)C1Cc2c(cc(O)c3c(=O)c4ccccc4n(C)c23)O1	0	0	0	0	0	0	0	0	0	0	0	0	0	0	0	0	0	0	0	0	0	0	0	0	0	0	0	0	0	0	0	0	0	0	0	0	0	0	0	0	0	0	0	0	0	0	0
389	Gravacridonediol glucoside	Cn1c2ccccc2c(=O)c2c(O)cc3c(c21)CC(C(C)(O)COC1OC(CO)C(O)C(O)C1O)O3	0	0	0	0	0	0	0	0	0	0	0	0	0	0	0	0	0	0	0	0	0	0	0	0	0	0	0	0	0	0	0	0	0	0	0	0	0	0	0	0	0	0	0	0	0	0	0
390	Gravacridonolchlorine	Cn1c2ccccc2c(=O)c2c(O)cc3c(c21)CC(C(Cl)(CO)CO)O3	0	0	0	0	0	0	0	0	0	0	0	0	0	0	0	0	0	0	0	0	0	0	0	0	0	0	0	0	0	0	0	0	0	0	0	0	0	0	0	0	0	0	0	0	0	0	0
391	Gravacridonetriol	Cn1c2ccccc2c(=O)c2c(O)cc3c(c21)CC(C(O)(CO)CO)O3	0	0	0	0	0	0	0	0	0	0	0	0	0	0	0	0	0	0	0	0	0	0	0	0	0	0	0	0	0	0	0	0	0	0	0	0	0	0	0	0	0	0	0	0	0	0	0
392	Gravacridonetriol glucoside	Cn1c2ccccc2c(=O)c2c(O)cc3c(c21)CC(C(O)(CO)COC1OC(CO)C(O)C(O)C1O)O3	0	0	0	0	0	0	0	0	0	0	0	0	0	0	0	0	0	0	0	0	0	0	0	0	0	0	0	0	0	0	0	0	0	0	0	0	0	0	0	0	0	0	0	0	0	0	0
393	5-Methoxynoracronycine	COc1cccc2c(=O)c3c(O)cc4c(c3n(C)c12)C=CC(C)(C)O4	0	0	0	0	0	0	0	0	0	0	0	0	0	0	0	0	0	0	0	0	0	0	0	0	0	0	0	0	0	0	0	0	0	0	0	0	0	0	0	0	0	0	0	0	0	0	0
394	Amphibine H	COc1ccc2cc1C=CN=C(O)C(Cc1ccccc1)N=C(O)C1C(CCN1C(=O)C(N=C(O)C(C)N(C)C)C(C)C)O2	0	0	0	0	0	0	0	0	0	0	0	0	0	0	0	0	0	0	0	0	0	0	0	0	0	0	0	0	0	0	0	0	0	0	0	0	0	0	0	0	0	0	0	0	0	0	0
395	Nummularine B	CNC(C)C(O)=NC(C(=O)N1CCC2Oc3ccc(OC)c(c3)C=CN=C(O)C(Cc3ccccc3)N=C(O)C21)C(C)C	0	0	0	0	0	0	0	0	0	0	0	0	0	0	0	0	0	0	0	0	0	0	0	0	0	0	0	0	0	0	0	0	0	0	0	0	0	0	0	0	0	0	0	0	0	0	0
396	Mucronine D	CCC(C)C1NC(=O)C2C(CCN2C(=O)C(CC(C)C)NC(=O)C(Cc2ccccc2)N(C)C)Oc2ccc(OC)c(c2)C=CNC1=O	0	0	0	0	0	0	0	0	0	0	0	0	0	0	0	0	0	0	0	0	0	0	0	0	0	0	0	0	0	0	0	0	0	0	0	0	0	0	0	0	0	0	0	0	0	0	0
397	Nummularine A	CCC(C)C1NC(=O)C2C(CCN2C(=O)C(CC(C)C)NC(=O)C(Cc2ccccc2)NC)Oc2ccc(OC)c(c2)C=CNC1=O	0	0	0	0	0	0	0	0	0	0	0	0	0	0	0	0	0	0	0	0	0	0	0	0	0	0	0	0	0	0	0	0	0	0	0	0	0	0	0	0	0	0	0	0	0	0	0
398	Oxoglaucine	COc1cc2c(cc1OC)-c1c(OC)c(OC)cc3ccnc(c13)C2=O	0	0	0	0	0	0	0	0	0	0	0	0	0	0	0	0	0	0	0	0	0	0	0	0	0	0	0	0	0	0	0	0	0	0	0	0	0	0	0	0	0	0	0	0	0	0	0
399	Mauritine A	CC(C)C(N=C(O)C(C)N(C)C)C(=O)N1CCC2Oc3ccc(cc3)C=CN=C(O)C(Cc3ccccc3)N=C(O)C21	0	0	0	0	0	0	0	0	0	0	0	0	0	0	0	0	0	0	0	0	0	0	0	0	0	0	0	0	0	0	0	0	0	0	0	0	0	0	0	0	0	0	0	0	0	0	0
400	Ceanothine B	CC(C)C1Oc2ccc(cc2)C=CNC(=O)C(Cc2ccccc2)NC(=O)C1NC(=O)C1CCCN1C	0	0	0	0	0	0	0	0	0	0	0	0	0	0	0	0	0	0	0	0	0	0	0	0	0	0	0	0	0	0	0	0	0	0	0	0	0	0	0	0	0	0	0	0	0	0	0
401	Ceanothine C	CC(C)CC1NC(=O)C(NC(=O)C2CCCN2C)C(C(C)C)Oc2ccc(cc2)C=CNC1=O	0	0	0	0	0	0	0	0	0	0	0	0	0	0	0	0	0	0	0	0	0	0	0	0	0	0	0	0	0	0	0	0	0	0	0	0	0	0	0	0	0	0	0	0	0	0	0
402	Ceanothine D	CCC(C)C1Oc2ccc(cc2)C=CNC(=O)C(CC(C)C)NC(=O)C1NC(=O)C1CCCN1C	0	0	0	0	0	0	0	0	0	0	0	0	0	0	0	0	0	0	0	0	0	0	0	0	0	0	0	0	0	0	0	0	0	0	0	0	0	0	0	0	0	0	0	0	0	0	0
403	Ceanothine E	CC(C)CC1N=C(O)C(N=C(O)C(Cc2ccccc2)N(C)C)C(c2ccccc2)Oc2ccc(cc2)C=CN=C1O	0	0	0	0	0	0	0	0	0	0	0	0	0	0	0	0	0	0	0	0	0	0	0	0	0	0	0	0	0	0	0	0	0	0	0	0	0	0	0	0	0	0	0	0	0	0	0
404	beta1-Tomatidine	CC1CCC2(NC1)OC1CC3C4CCC5CC(OC6OC(CO)C(OC7OC(CO)C(O)C(O)C7OC7OC(CO)C(O)C(O)C7O)C(O)C6O)CCC5(C)C4CCC3(C)C1C2C	0	0	0	0	0	0	0	0	0	0	0	0	0	0	0	0	0	0	0	0	0	0	0	0	0	0	0	0	0	0	0	0	0	0	0	0	0	0	0	0	0	0	0	0	0	0	0
405	Blepharin	O=C1Nc2ccccc2OC1OC1OC(CO)C(O)C(O)C1O	0	0	0	0	0	0	0	0	0	0	0	0	0	0	0	0	0	0	0	0	0	0	0	0	0	0	0	0	0	0	0	0	0	0	0	0	0	0	0	0	0	0	0	0	0	0	0
406	Murrayenol	CC1(C)OC1C1CC(C2CCC3(C)C4=CCC5C(C)(C)C(O)C=CC5(C)C4CCC23C)C(O)O1	0	0	0	0	0	0	0	0	0	0	0	0	0	0	0	0	0	0	0	0	0	0	0	0	0	0	0	0	0	0	0	0	0	0	0	0	1	0	0	0	0	0	0	0	0	0	0
407	Geranyl glucoside	CC(C)=CCCC(C)=CCOC1OC(CO)C(O)C(O)C1O	0	0	0	0	0	0	0	0	0	0	0	0	0	0	0	0	0	0	0	0	0	0	0	0	0	0	0	0	0	0	0	0	0	0	0	0	0	0	0	0	0	0	0	0	0	0	0
408	Geranyl apiosyl-glucoside	CC(C)=CCCC(C)=CCOC1OC(COC2OCC(O)(CO)C2O)C(O)C(O)C1O	0	0	0	0	0	0	0	0	0	0	0	0	0	0	0	0	0	0	0	0	0	0	0	0	0	0	0	0	0	0	0	0	0	0	0	0	0	0	0	0	0	0	0	0	0	0	0
409	Geranyl arabinofuranosyl-glucoside	CC(C)=CCCC(C)=CCOC1OC(COC2OC(CO)C(O)C2O)C(O)C(O)C1O	0	0	0	0	0	0	0	0	0	0	0	0	0	0	0	0	0	0	0	0	0	0	0	0	0	0	0	0	0	0	0	0	0	0	0	0	0	0	0	0	0	0	0	0	0	0	0
410	Geranyl rhamnosyl-glucoside	CC(C)=CCCC(C)=CCOC1OC(COC2OC(C)C(O)C(O)C2O)C(O)C(O)C1O	0	0	0	0	0	0	0	0	0	0	0	0	0	0	0	0	0	0	0	0	0	0	0	0	0	0	0	0	0	0	0	0	0	0	0	0	0	0	0	0	0	0	0	0	0	0	0
411	Geranyl 3-methylbutanoate	CC(C)=CCCC(C)=CCOC(=O)CC(C)C	0	0	0	0	0	0	0	0	0	0	0	0	0	0	0	0	0	0	0	0	0	0	0	0	0	0	0	0	0	0	0	0	0	0	0	0	0	0	0	0	0	0	0	0	0	0	0
412	Geranyl hexanoate	CCCCCC(=O)OCC=C(C)CCC=C(C)C	0	0	0	0	0	0	0	0	0	0	0	0	0	0	0	0	0	0	0	0	0	0	0	0	0	0	0	0	0	0	0	0	0	0	0	0	0	0	0	0	0	0	0	0	0	0	0
413	Neryl glucoside	CC(C)=CCCC(C)=CCOC1OC(CO)C(O)C(O)C1O	0	0	0	0	0	0	0	0	0	0	0	0	0	0	0	0	0	0	0	0	0	0	0	0	0	0	0	0	0	0	0	0	0	0	0	0	0	0	0	0	0	0	0	0	0	0	0
414	Neryl arabinofuranosyl-glucoside	CC(C)=CCCC(C)=CCOC1OC(COC2OC(CO)C(O)C2O)C(O)C(O)C1O	0	0	0	0	0	0	0	0	0	0	0	0	0	0	0	0	0	0	0	0	0	0	0	0	0	0	0	0	0	0	0	0	0	0	0	0	0	0	0	0	0	0	0	0	0	0	0
415	Neryl rhamnosyl-glucoside	CC(C)=CCCC(C)=CCOC1OC(COC2OC(C)C(O)C(O)C2O)C(O)C(O)C1O	0	0	0	0	0	0	0	0	0	0	0	0	0	0	0	0	0	0	0	0	0	0	0	0	0	0	0	0	0	0	0	0	0	0	0	0	0	0	0	0	0	0	0	0	0	0	0
416	Neryl isovalerate	CC(C)=CCCC(C)=CCOC(=O)CC(C)C	0	0	0	0	0	0	0	0	0	0	0	0	0	0	0	0	0	0	0	0	0	0	0	0	0	0	0	0	0	0	0	0	0	0	0	0	0	0	0	0	0	0	0	0	0	0	0
417	(E)-Ribosylzeatin arabinosyl-(1->4)-[galactosyl-(1->2)-galactosyl-(1->3)-arabinoyl-(1->3)]-galactoside	CC(=CCNc1ncnc2c1ncn2C1OC(CO)C(O)C1O)COC1OC(CO)C(OC2OCC(O)C(O)C2O)C(OC2OC(CO)C(OC3OC(CO)C(O)C(O)C3OC3OC(CO)C(O)C(O)C3O)C2O)C1O	0	0	0	0	0	0	0	0	0	0	0	0	0	0	0	0	0	0	0	0	0	0	0	0	0	0	0	0	0	0	0	0	0	0	0	0	0	0	0	0	0	0	0	0	0	0	0
418	Galactosyl 4-hydroxyproline	O=C(OC1OC(CO)C(O)C(O)C1O)C1CC(O)CN1	0	0	0	0	0	0	0	0	0	0	0	0	0	0	0	0	0	0	0	0	0	0	0	0	0	0	0	0	0	0	0	0	0	0	0	0	0	0	0	0	0	0	0	0	0	0	0
419	4-Hydroxyproline galactoside	O=C(O)C1CC(OC2OC(CO)C(O)C(O)C2O)CN1	0	0	0	0	0	0	0	0	0	0	0	0	0	0	0	0	0	0	0	0	0	0	0	0	0	0	0	0	0	0	0	0	0	0	0	0	0	0	0	0	0	0	0	0	0	0	0
420	N-Phenylacetylaspartic acid	O=C(O)CC(NC(=O)Cc1ccccc1)C(=O)O	0	0	0	0	0	0	0	0	0	0	0	0	0	0	0	0	0	0	0	0	0	0	0	0	0	0	0	0	0	0	0	0	0	0	0	0	0	0	0	0	0	0	0	0	0	0	0
421	N-Feruloylglycyl-L-phenylalanine	COc1cc(C=CC(O)=NCC(O)=NC(Cc2ccccc2)C(=O)O)ccc1O	0	0	0	0	0	0	0	0	0	0	0	0	0	0	0	0	0	0	0	0	0	0	0	0	0	0	0	0	0	0	0	0	0	0	0	0	0	0	0	0	0	0	0	0	0	0	0
422	Betavulgaroside I	CC1(C)CCC2(C(=O)OC3OC(CO)C(O)C(O)C3O)CCC3(C)C(=CCC4C5(C)CCC(OC6OC(C(=O)O)C7OC(O)(C(=O)O)C(OCC(=O)O)OC7C6O)C(C)(C)C5CCC43C)C2C1	0	0	0	0	0	0	0	0	0	0	0	0	0	0	0	0	0	0	0	0	0	0	0	0	0	0	0	0	0	0	0	0	0	0	0	0	0	0	0	0	0	0	0	0	0	0	0
423	5Z-Octenyl acetate	CCC=CCCCCOC(C)=O	0	0	0	0	0	0	0	0	0	0	0	0	0	0	0	0	0	0	0	0	0	0	0	0	0	0	0	0	0	0	0	0	0	0	0	0	0	0	0	0	0	0	0	0	0	0	0
424	(R)-1,3-Octanediol	CCCCCC(O)CCO	0	0	0	0	0	0	0	0	0	0	0	0	0	0	0	0	0	0	0	0	0	0	0	0	0	0	0	0	0	0	0	0	0	0	0	0	0	0	0	0	0	0	0	0	0	0	0
425	Isorheagenine	CN1CCc2cc3c(cc2C2OC(O)c4c(ccc5c4OCO5)C21)OCO3	0	0	0	0	0	0	0	0	0	0	0	0	0	0	0	0	0	0	0	0	0	0	0	0	0	0	0	0	0	0	0	0	0	0	0	0	0	0	0	0	0	0	0	0	0	0	0
426	Alkaloid RC	CN1CCc2cc3c(cc2C2OC(OC4OC(CO)C(O)C(O)C4O)c4c(ccc5c4OCO5)C21)OCO3	0	0	0	0	0	0	0	0	0	0	0	0	0	0	0	0	0	0	0	0	0	0	0	0	0	0	0	0	0	0	0	0	0	0	0	0	0	0	0	0	0	0	0	0	0	0	0
427	(R)-1-O-b-D-glucopyranosyl-1,3-octanediol	CCCCCC(O)CCOC1OC(CO)C(O)C(O)C1O	0	0	0	0	0	0	0	0	0	0	0	0	0	0	0	0	0	0	0	0	0	0	0	0	0	0	0	0	0	0	0	0	0	0	0	0	0	0	0	0	0	0	0	0	0	0	0
428	Glaucamine	COc1cc2c(cc1OC)C1OC(O)c3c(ccc4c3OCO4)C1N(C)CC2	0	0	0	0	0	0	0	0	0	0	0	0	0	0	0	0	0	0	0	0	0	0	0	0	0	0	0	0	0	0	0	0	0	0	0	0	0	0	0	0	0	0	0	0	0	0	0
429	Salsolinol	CC1NCCc2cc(O)c(O)cc21	0	0	0	0	0	0	0	0	0	0	0	0	0	0	0	0	0	0	0	0	0	0	0	0	0	0	0	0	0	0	0	0	0	0	0	0	0	0	0	0	0	0	0	0	0	0	0
430	(S)-Salsolinol	CC1NCCc2cc(O)c(O)cc21	0	0	0	0	0	0	0	0	0	0	0	0	0	0	0	0	0	0	0	0	0	0	0	0	0	0	0	0	0	0	0	0	0	0	0	0	0	0	0	0	0	0	0	0	0	0	0
431	7-Acetoxy-2-methylisoflavone	CC(=O)Oc1ccc2c(=O)c(-c3ccccc3)c(C)oc2c1	0	0	0	0	0	0	0	0	0	0	0	0	0	0	0	0	0	0	0	0	0	0	0	0	0	0	0	0	0	0	0	0	0	0	0	0	0	0	0	0	0	0	0	0	0	0	0
432	Moupinamide	COc1cc(C=CC(=O)NCCc2ccc(O)cc2)ccc1O	0	0	0	0	0	0	0	0	0	0	0	0	0	0	0	0	0	0	0	0	0	0	0	0	0	0	0	0	0	0	0	0	0	0	0	0	0	0	0	0	0	0	0	0	0	0	0
433	Tyramine	NCCc1ccc(O)cc1	0	0	0	0	0	0	0	0	0	0	0	0	0	0	0	0	0	0	0	0	0	0	0	0	0	0	0	0	0	0	0	0	0	0	0	0	0	0	0	0	0	0	0	0	0	0	0
434	N-[2-(4-Hydroxyphenyl)ethyl]benzamide	OC(=NCCc1ccc(O)cc1)c1ccccc1	0	0	0	0	0	0	0	0	0	0	0	0	0	0	0	0	0	0	0	0	0	0	0	0	0	0	0	0	0	0	0	0	0	0	0	0	0	0	0	0	0	0	0	0	0	0	0
435	N-Methyltyramine	CNCCc1ccc(O)cc1	0	0	0	0	0	0	0	0	0	0	0	0	0	0	0	0	0	0	0	0	0	0	0	0	0	0	0	0	0	0	0	0	0	0	0	0	0	0	0	0	0	0	0	0	0	0	0
436	Sanguinarine	C[n+]1cc2c3c(ccc2c2ccc4cc5c(cc4c21)OCO5)OCO3	0	0	0	0	0	0	0	0	0	0	0	0	0	0	0	0	0	0	0	0	0	0	0	0	0	0	0	0	0	0	0	0	0	0	0	0	0	0	0	0	0	0	0	0	0	0	0
437	Saxitoxin	N=C1NC(COC(N)=O)C2NC(N)=NC23N1CCC3(O)O	0	0	0	0	0	0	0	0	0	0	0	0	0	0	0	0	0	0	0	0	0	0	0	0	0	0	0	0	0	0	0	0	0	0	0	0	0	0	0	0	0	0	0	0	0	0	0
438	Neosaxitoxin	N=C1N(O)C(COC(N)=O)C2NC(N)=NC23N1CCC3(O)O	0	0	0	0	0	0	0	0	0	0	0	0	0	0	0	0	0	0	0	0	0	0	0	0	0	0	0	0	0	0	0	0	0	0	0	0	0	0	0	0	0	0	0	0	0	0	0
439	O-Methylcorypalline	COc1cc2c(cc1OC)CN(C)CC2	0	0	0	0	0	0	0	0	0	0	0	0	0	0	0	0	0	0	0	0	0	0	0	0	0	0	0	0	0	0	0	0	0	0	0	0	0	0	0	0	0	0	0	0	0	0	0
440	alpha-Solanigrine	CC1CCC2(NC1)OC1CC3C4CC=C5CC(O)CCC5(C)C4CCC3(C)C1C2C	0	0	0	0	0	0	0	0	0	0	0	0	0	0	0	0	0	0	0	0	0	0	0	0	0	0	0	0	0	0	0	0	0	0	0	0	0	0	0	0	0	0	0	0	0	0	0
441	gamma2-Solamarine	CC1CCC2(NC1)OC1CC3C4CC=C5CC(OC6OC(CO)C(OC7OC(C)C(O)C(O)C7O)C(O)C6O)CCC5(C)C4CCC3(C)C1C2C	0	0	0	0	0	0	0	0	0	0	0	0	0	0	0	0	0	0	0	0	0	0	0	0	0	0	0	0	0	0	0	0	0	0	0	0	0	0	0	0	0	0	0	0	0	0	0
442	2'-Hydroxydaidzein	O=c1c(-c2ccc(O)cc2O)coc2cc(O)ccc12	0	0	0	0	0	0	0	0	0	0	0	0	0	0	0	0	0	0	0	0	0	0	0	0	0	0	0	0	0	0	0	0	0	0	0	0	0	0	0	0	0	0	0	0	0	0	0
443	Solacauline	CC1CCC2C(C)C3C(CC4C5CC=C6CC(OC7OCC(OC8OCC(OC9OC(CO)C(O)C(O)C9O)C(O)C8O)C(O)C7O)CCC6(C)C5CCC43C)N2C1	0	0	0	0	0	0	0	0	0	0	0	0	0	0	0	0	0	0	0	0	0	0	0	0	0	0	0	0	0	0	0	0	0	0	0	0	0	0	0	0	0	0	0	0	0	0	0
444	(E,E)-Trichostachine	O=C(C=CC=Cc1ccc2c(c1)OCO2)N1CCCC1	0	0	0	0	0	0	0	0	0	0	0	0	0	0	0	0	0	0	0	0	0	0	0	0	0	0	0	0	0	0	0	0	0	0	0	0	0	0	0	0	0	0	0	0	0	0	0
445	L-Tyrosine ethyl ester hydrochloride	CCOC(=O)C(N)Cc1ccc(O)cc1.Cl	0	0	0	0	0	0	0	0	0	0	0	0	0	0	0	0	0	0	0	0	0	0	0	0	0	0	0	0	0	0	0	0	0	0	0	0	0	0	0	0	0	0	0	0	0	0	0
446	L-Tyrosine	NC(Cc1ccc(O)cc1)C(=O)O	0	0	0	0	0	0	0	0	0	0	0	0	0	0	0	0	0	0	0	0	0	0	0	0	0	0	0	0	0	0	0	0	0	0	0	0	0	0	0	0	0	0	0	0	0	0	0
447	Papaverine	COc1ccc(Cc2nccc3cc(OC)c(OC)cc23)cc1OC	0	0	0	0	0	0	0	0	0	0	0	0	0	0	0	0	0	0	0	0	0	0	0	0	0	0	0	0	0	0	0	0	0	0	0	0	0	0	0	0	0	0	0	0	0	0	0
448	N-Methylporphyroxine	COc1cc2c(cc1O)C1OC(OC)c3c(ccc4c3OCO4)C1N(C)CC2	0	0	0	0	0	0	0	0	0	0	0	0	0	0	0	0	0	0	0	0	0	0	0	0	0	0	0	0	0	0	0	0	0	0	0	0	0	0	0	0	0	0	0	0	0	0	0
449	Piperine	O=C(C=CC=Cc1ccc2c(c1)OCO2)N1CCCCC1	0	0	0	0	0	0	0	0	0	0	0	0	0	0	0	0	0	0	0	0	0	0	0	0	0	0	0	0	0	0	0	0	0	0	0	0	0	0	0	0	0	0	0	0	0	0	0
450	Chavicine	O=C(C=CC=Cc1ccc2c(c1)OCO2)N1CCCCC1	0	0	0	0	0	0	0	0	0	0	0	0	0	0	0	0	0	0	0	0	0	0	0	0	0	0	0	0	0	0	0	0	0	0	0	0	0	0	0	0	0	0	0	0	0	0	0
451	Isochavicine	O=C(C=CC=Cc1ccc2c(c1)OCO2)N1CCCCC1	0	0	0	0	0	0	0	0	0	0	0	0	0	0	0	0	0	0	0	0	0	0	0	0	0	0	0	0	0	0	0	0	0	0	0	0	0	0	0	0	0	0	0	0	0	0	0
452	Isopiperine	O=C(C=CC=Cc1ccc2c(c1)OCO2)N1CCCCC1	0	0	0	0	0	0	0	0	0	0	0	0	0	0	0	0	0	0	0	0	0	0	0	0	0	0	0	0	0	0	0	0	0	0	0	0	0	0	0	0	0	0	0	0	0	0	0
453	Theophylline	Cn1c(=O)c2[nH]cnc2n(C)c1=O	0	0	0	0	0	0	0	0	0	0	0	0	0	0	0	0	0	0	0	0	0	0	0	0	0	0	0	0	0	0	0	0	0	0	0	0	0	0	0	0	0	0	0	0	0	0	0
454	(-)-Thebaine	COC1=CC=C2C3Cc4ccc(OC)c5c4C2(CCN3C)C1O5	0	0	0	0	0	0	0	0	0	0	0	0	0	0	0	0	0	0	0	0	0	0	0	0	0	0	0	0	0	0	0	0	0	0	0	0	0	0	0	0	0	0	0	0	0	0	0
455	Theobromine	Cn1cnc2c1c(=O)[nH]c(=O)n2C	0	0	0	0	0	0	0	0	0	0	0	0	0	0	0	0	0	0	0	0	0	0	0	0	0	0	0	0	0	0	0	0	0	0	0	0	0	0	0	0	0	0	0	0	0	0	0
456	Sinapine	COc1cc(C=CC(=O)OCC[N+](C)(C)C)cc(OC)c1O	0	0	0	0	0	0	0	0	0	0	0	0	0	0	0	0	0	0	0	0	0	0	0	0	0	0	0	0	0	0	0	0	0	0	0	0	0	0	0	0	0	0	0	0	0	0	0
457	xi-1-(3,4-Dihydroxyphenyl)-1,2-ethanediol	OCC(O)c1ccc(O)c(O)c1	0	0	0	0	0	0	0	0	0	0	0	0	0	0	0	0	0	0	0	0	0	0	0	0	0	0	0	0	0	0	0	0	0	0	0	0	0	0	0	0	0	0	0	0	0	0	0
458	6-O-Methylcodeine	COc1ccc2c3c1OC1C(OC)C=CC4C(C2)N(C)CCC341	0	0	0	0	0	0	0	0	0	0	0	0	0	0	0	0	0	0	0	0	0	0	0	0	0	0	0	0	0	0	0	0	0	0	0	0	0	0	0	0	0	0	0	0	0	0	0
459	Genomorphine	C[N+]1([O-])CCC23c4c5ccc(O)c4OC2C(O)C=CC3C1C5	0	0	0	0	0	0	0	0	0	0	0	0	0	0	0	0	0	0	0	0	0	0	0	0	0	0	0	0	0	0	0	0	0	0	0	0	0	0	0	0	0	0	0	0	0	0	0
460	Chlorogenoquinone	O=C(C=CC1=CC(=O)C(=O)C=C1)OC1CC(O)(C(=O)O)CC(O)C1O	0	0	0	0	0	0	0	0	0	0	0	0	0	0	0	0	0	0	0	0	0	0	0	0	0	0	0	0	0	0	0	0	0	0	0	0	0	0	0	0	0	0	0	0	0	0	0
461	L-Saccharopine	NC(CCCCNC(CCC(=O)O)C(=O)O)C(=O)O	0	0	0	0	0	0	0	0	0	0	0	0	0	0	0	0	0	0	0	0	0	0	0	0	0	0	0	0	0	0	0	0	0	0	0	0	0	0	0	0	0	0	0	0	0	0	0
462	4-Hydroxycitrulline	N=C(O)NCC(O)CC(N)C(=O)O	0	0	0	0	0	0	0	0	0	0	0	0	0	0	0	0	0	0	0	0	0	0	0	0	0	0	0	0	0	0	0	0	0	0	0	0	0	0	0	0	0	0	0	0	0	0	0
463	L-Stachydrine	C[N+]1(C)CCCC1C(=O)[O-]	0	0	0	0	0	0	0	0	0	0	0	0	0	0	0	1	0	0	0	0	0	0	0	0	0	0	0	0	0	0	0	0	0	0	0	0	0	0	0	0	0	0	0	0	0	0	0
465	L-Valine	CC(C)C(N)C(=O)O	0	0	0	0	0	0	0	0	0	0	0	0	0	0	0	0	0	0	0	0	0	0	0	0	0	0	0	0	0	0	0	0	0	0	0	0	0	0	0	0	0	0	0	0	0	0	0
466	Indicaxanthin	O=C(O)C1=CC(=CC=[N+]2CCCC2C(=O)[O-])CC(C(=O)O)N1	0	0	0	0	0	0	0	0	0	0	0	0	0	0	0	1	0	0	0	0	0	0	0	0	0	0	0	0	0	0	0	0	0	0	0	0	0	0	0	0	0	0	0	0	0	0	0
467	Isodesmosine	NC(CCCC[n+]1cc(CCC(N)C(=O)O)cc(CCC(N)C(=O)O)c1CCCC(N)C(=O)O)C(=O)[O-]	0	0	0	0	0	0	0	0	0	0	0	0	0	0	0	0	0	0	0	0	0	0	0	0	0	0	0	0	0	0	0	0	0	0	0	0	0	0	0	0	0	0	0	0	0	0	0
468	L-3-Aminodihydro-2(3H)-furanone	NC1CCOC1=O	0	0	0	0	0	0	0	0	0	0	0	0	0	0	0	0	0	0	0	0	0	0	0	0	0	0	0	0	0	0	0	0	0	0	0	0	0	0	0	0	0	0	0	0	0	0	0
469	Cucurbic acid	CCC=CCC1C(O)CCC1CC(=O)O	0	0	0	0	0	0	0	0	0	0	0	0	0	0	0	0	0	0	0	0	0	0	0	0	0	0	0	0	0	0	0	0	0	0	0	0	0	0	0	0	0	0	0	0	0	0	0
470	(+)-threo-2-Amino-3,4-dihydroxybutanoic acid	NC(C(=O)O)C(O)CO	0	0	0	0	0	0	0	0	0	0	0	0	0	0	0	0	0	0	0	0	0	0	0	0	0	0	0	0	0	0	0	0	0	0	0	0	0	0	0	0	0	0	0	0	0	0	0
471	L-Furosine	NC(CCCCNCC(=O)c1ccco1)C(=O)O	0	0	0	0	0	0	0	0	0	0	0	0	0	0	0	0	0	0	0	0	0	0	0	0	0	0	0	0	0	0	0	0	0	0	0	0	0	0	0	0	0	0	0	0	0	0	0
472	N-Jasmonoylisoleucine	CCC=CCC1C(=O)CCC1CC(=O)NC(C(=O)O)C(C)CC	0	0	0	0	0	0	0	0	0	0	0	0	0	0	0	0	0	0	0	0	0	0	0	0	0	0	0	0	0	0	0	0	0	0	0	0	0	0	0	0	0	0	0	0	0	0	0
474	L-Lysine	NCCCCC(N)C(=O)O	0	0	0	0	0	0	0	0	0	0	0	0	0	0	0	0	0	0	0	0	0	0	0	0	0	0	0	0	0	0	0	0	0	0	0	0	0	0	0	0	0	0	0	0	0	0	0
475	L-Lysine hydrochloride	Cl.NCCCCC(N)C(=O)O	0	0	0	0	0	0	0	0	0	0	0	0	0	0	0	0	0	0	0	0	0	0	0	0	0	0	0	0	0	0	0	0	0	0	0	0	0	0	0	0	0	0	0	0	0	0	0
476	N6-Acetyl-L-lysine	CC(=O)NCCCCC(N)C(=O)O	0	0	0	0	0	0	0	0	0	0	0	0	0	0	0	0	0	0	0	0	0	0	0	0	0	0	0	0	0	0	0	0	0	0	0	0	0	0	0	0	0	0	0	0	0	0	0
477	1-(3,4-Dimethoxyphenyl)ethanone	COc1ccc(C(C)=O)cc1OC	0	0	0	0	0	0	0	0	0	0	0	0	0	0	0	0	0	0	0	0	0	0	0	0	0	0	0	0	0	0	0	0	0	0	0	0	0	0	0	0	0	0	0	0	0	0	0
478	L-N-(3-Carboxypropyl)glutamine	NC(CCC(=O)NCCCC(=O)O)C(=O)O	0	0	0	0	0	0	0	0	0	0	0	0	0	0	0	0	0	0	0	0	0	0	0	0	0	0	0	0	0	0	0	0	0	0	0	0	0	0	0	0	0	0	0	0	0	0	0
479	gamma-L-Glutamyl-S-(2-carboxy-1-propyl)cysteinylglycine	CC(CSCC(NC(=O)CCC(N)C(=O)O)C(=O)NCC(=O)O)C(=O)O	0	0	0	0	0	0	0	0	0	0	0	0	0	0	0	0	0	0	0	0	0	0	0	0	0	0	0	0	0	0	0	0	0	0	0	0	0	0	0	0	0	0	0	0	0	0	0
480	Homoglutathione	NC(CCC(=O)NC(CS)C(=O)NCCC(=O)O)C(=O)O	0	0	0	0	0	0	0	0	0	0	0	0	0	0	0	0	0	0	0	0	0	0	0	0	0	0	0	0	0	0	0	0	0	0	0	1	0	0	0	0	0	0	0	0	0	0	0
481	L-L-Homoglutathione	NC(CCC(O)=NC(CS)C(O)=NCCC(=O)O)C(=O)O	0	0	0	0	0	0	0	0	0	0	0	0	0	0	0	0	0	0	0	0	0	0	0	0	0	0	0	0	0	0	0	0	0	0	0	1	0	0	0	0	0	0	0	0	0	0	0
482	N-gamma-L-Glutamyl-L-isoleucine	CCC(C)C(NC(=O)CCC(N)C(=O)O)C(=O)O	0	0	0	0	0	0	0	0	0	0	0	0	0	0	0	0	0	0	0	0	0	0	0	0	0	0	0	0	0	0	0	0	0	0	0	0	0	0	0	0	0	0	0	0	0	0	0
483	N-gamma-L-Glutamyl-L-valine	CC(C)C(NC(=O)CCC(N)C(=O)O)C(=O)O	0	0	0	0	0	0	0	0	0	0	0	0	0	0	0	0	0	0	0	0	0	0	0	0	0	0	0	0	0	0	0	0	0	0	0	0	0	0	0	0	0	0	0	0	0	0	0
484	Glycine	NCC(=O)O	0	0	0	0	0	0	0	0	0	0	0	0	0	0	0	0	0	0	0	0	0	0	0	0	0	0	0	0	0	0	0	0	0	0	0	0	0	0	0	0	0	0	0	0	0	0	0
485	L-cis-3-Amino-2-pyrrolidinecarboxylic acid	NC1CCNC1C(=O)O	0	0	0	0	0	0	0	0	0	0	0	0	0	0	0	0	0	0	0	0	0	0	0	0	0	0	0	0	0	0	0	0	0	0	0	0	0	0	0	0	0	0	0	0	0	0	0
486	L-Nicotianine	NC(CC[n+]1cccc(C(=O)[O-])c1)C(=O)O	0	0	0	0	0	0	0	0	0	0	0	0	0	0	0	0	0	0	0	0	0	0	0	0	0	0	0	0	0	0	0	0	0	0	0	0	0	0	0	0	0	0	0	0	0	0	0
487	(3-Nitroamino)alanine	NC(CN[N+](=O)[O-])C(=O)O	0	0	0	0	0	0	0	0	0	0	0	0	0	0	0	0	0	0	0	0	0	0	0	0	0	0	0	0	0	0	0	0	0	0	0	0	0	0	0	0	0	0	0	0	0	0	0
488	Ochratoxin A	CC1Cc2c(Cl)cc(C(=O)NC(Cc3ccccc3)C(=O)O)c(O)c2C(=O)O1	0	0	0	0	0	0	0	0	0	0	0	0	0	0	0	0	0	0	0	0	0	0	0	0	0	0	0	0	0	0	0	0	0	0	0	0	0	0	0	0	0	0	0	0	0	0	0
489	Ochratoxin C	CCOC(=O)C(Cc1ccccc1)NC(=O)c1cc(Cl)c2c(c1O)C(=O)OC(C)C2	0	0	0	0	0	0	0	0	0	0	0	0	0	0	0	0	0	0	0	0	0	0	0	0	0	0	0	0	0	0	0	0	0	0	0	0	0	0	0	0	0	0	0	0	0	0	0
490	Ochratoxin B	CC1Cc2ccc(C(=O)NC(Cc3ccccc3)C(=O)O)c(O)c2C(=O)O1	0	0	0	0	0	0	0	0	0	0	0	0	0	0	0	0	0	0	0	0	0	0	0	0	0	0	0	0	0	0	0	0	0	0	0	0	0	0	0	0	0	0	0	0	0	0	0
491	L-2-Amino-3-(oxalylamino)propanoic acid	NC(CNC(=O)C(=O)O)C(=O)O	0	0	0	0	0	0	0	0	0	0	0	0	0	0	0	0	0	0	0	0	0	0	0	0	0	0	0	0	0	0	0	0	0	0	0	0	0	0	0	0	0	0	0	0	0	0	0
492	Oxypinnatanine	NC(CC(O)C(O)=NC1OCC=C1CO)C(=O)O	0	0	0	0	0	0	0	0	0	0	0	0	0	0	0	0	0	0	0	0	0	0	0	0	0	0	0	0	0	0	0	0	0	0	0	0	0	0	0	0	0	0	0	0	0	0	0
493	(S)-a-Amino-2,5-dihydro-5-oxo-4-isoxazolepropanoic acid N2-glucoside	NC(Cc1cn(C2OC(CO)C(O)C(O)C2O)oc1=O)C(=O)O	0	0	0	0	0	0	0	0	0	0	0	0	0	0	0	0	0	0	0	0	0	0	0	0	0	0	0	0	0	0	0	0	0	0	0	0	0	0	0	0	0	0	0	0	0	0	0
494	Neobetanin	O=C(O)C1=CC(=CC=[N+]2c3cc(O)c(OC4OC(CO)C(O)C(O)C4O)cc3CC2C(=O)[O-])C=C(C(=O)O)N1	0	0	0	0	0	0	0	0	0	0	0	0	0	0	0	1	0	0	0	0	0	0	0	0	0	0	0	0	0	0	0	0	0	0	0	0	0	0	0	0	0	0	0	0	0	0	0
495	Amaranthin	O=C(O)C1=CC(=CC=[N+]2c3cc(O)c(OC4OC(CO)C(O)C(O)C4OC4OC(C(=O)O)C(O)C(O)C4O)cc3CC2C(=O)[O-])CC(C(=O)O)N1	0	0	0	0	0	0	0	0	0	0	0	0	0	0	0	1	0	0	0	0	0	0	0	0	0	0	0	0	0	0	0	0	0	0	0	0	0	0	0	0	0	0	0	0	0	0	0
496	Betanidin	O=C(O)C1=CC(=CC=[N+]2c3cc(O)c(O)cc3CC2C(=O)[O-])CC(C(=O)O)N1	0	0	0	0	0	0	0	0	0	0	0	0	0	0	0	1	0	0	0	0	0	0	0	0	0	0	0	0	0	0	0	0	0	0	0	0	0	0	0	0	0	0	0	0	0	0	0
497	Betanin	O=C(O)C1=CC(=CC=[N+]2c3cc(O)c(OC4OC(CO)C(O)C(O)C4O)cc3CC2C(=O)[O-])CC(C(=O)O)N1	0	0	0	0	0	0	0	0	0	0	0	0	0	0	0	1	0	0	0	0	0	0	0	0	0	0	0	0	0	0	0	0	0	0	0	0	0	0	0	0	0	0	0	0	0	0	0
498	Turicine	C[N+]1(C)CC(O)CC1C(=O)[O-]	0	0	0	0	0	0	0	0	0	0	0	0	0	0	0	1	0	0	0	0	0	0	0	0	0	0	0	0	0	0	0	0	0	0	0	0	0	0	0	0	0	0	0	0	0	0	0
499	2-Acetyl-3-ethylpyrazine	CCc1nccnc1C(C)=O	0	0	0	0	0	0	0	0	0	0	0	0	0	0	0	0	0	0	0	0	0	0	0	0	0	0	0	0	0	0	0	0	0	0	0	0	0	0	0	0	0	0	0	0	0	0	0
500	Prebetanin	O=C(O)C1=CC(=CC=[N+]2c3cc(O)c(OC4OC(COS(=O)(=O)O)C(O)C(O)C4O)cc3CC2C(=O)[O-])CC(C(=O)O)N1	0	0	0	0	0	0	0	0	0	0	0	0	0	0	0	1	0	0	0	0	0	0	0	0	0	0	0	0	0	0	0	0	0	0	0	0	0	0	0	0	0	0	0	0	0	0	0
501	Isobetanidin	O=C(O)C1=CC(=CC=[N+]2c3cc(O)c(O)cc3CC2C(=O)[O-])CC(C(=O)O)N1	0	0	0	0	0	0	0	0	0	0	0	0	0	0	0	1	0	0	0	0	0	0	0	0	0	0	0	0	0	0	0	0	0	0	0	0	0	0	0	0	0	0	0	0	0	0	0
502	4-Hydroxyproline betaine	C[N+]1(C)CC(O)CC1C(=O)[O-]	0	0	0	0	0	0	0	0	0	0	0	0	0	0	0	1	0	0	0	0	0	0	0	0	0	0	0	0	0	0	0	0	0	0	0	0	0	0	0	0	0	0	0	0	0	0	0
503	Bis-gamma-glutamylcysteinylbis-beta-alanine	NC(CCC(O)=NC(CSSCC(N=C(O)CCC(N)C(=O)O)C(O)=NCCC(=O)O)C(O)=NCCC(=O)O)C(=O)O	0	0	0	0	0	0	0	0	0	0	0	0	0	0	0	0	0	0	0	0	0	0	0	0	0	0	0	0	0	0	0	0	1	0	1	0	0	0	0	0	0	0	0	0	0	0	0
504	L-2-Amino-4-(aminooxy)butanoic acid	NOCCC(N)C(=O)O	0	0	0	0	0	0	0	0	0	0	0	0	0	0	0	0	0	0	0	0	0	0	0	0	0	0	0	0	0	0	0	0	0	0	0	0	0	0	0	0	0	0	0	0	0	0	0
505	L-Canavanine	N=C(N)NOCCC(N)C(=O)O	0	0	0	0	0	0	0	0	0	0	0	0	0	0	0	0	0	0	0	0	0	0	0	0	0	0	0	0	0	0	0	0	0	0	0	0	0	0	0	0	0	0	0	0	0	0	0
506	(S)-alpha-Amino-4-carboxy-3-furanpropanoic acid	NC(Cc1cocc1C(=O)O)C(=O)O	0	0	0	0	0	0	0	0	0	0	0	0	0	0	0	0	0	0	0	0	0	0	0	0	0	0	0	0	0	0	0	0	0	0	0	0	0	0	0	0	0	0	0	0	0	0	0
507	S-Carboxymethyl-L-cysteine	NC(CSCC(=O)O)C(=O)O	0	0	0	0	0	0	0	0	0	0	0	0	0	0	0	0	0	0	0	0	0	0	0	0	0	0	0	0	0	0	0	0	0	0	0	0	0	0	0	0	0	0	0	0	0	0	0
508	NG,NG-Dimethyl-L-arginine	CN(C)C(=N)NCCCC(N)C(=O)O	0	0	0	0	0	0	0	0	0	0	0	0	0	0	0	0	0	0	0	0	0	0	0	0	0	0	0	0	0	0	0	0	0	0	0	0	0	0	0	0	0	0	0	0	0	0	0
509	NG,N'G-Dimethyl-L-arginine	CN=C(NC)NCCCC(N)C(=O)O	0	0	0	0	0	0	0	0	0	0	0	0	0	0	0	0	0	0	0	0	0	0	0	0	0	0	0	0	0	0	0	0	0	0	0	0	0	0	0	0	0	0	0	0	0	0	0
510	L-Targinine	CNC(=N)NCCCC(N)C(=O)O	0	0	0	0	0	0	0	0	0	0	0	0	0	0	0	0	0	0	0	0	0	0	0	0	0	0	0	0	0	0	0	0	0	0	0	0	0	0	0	0	0	0	0	0	0	0	0
511	L-Carnosine	NCCC(=O)NC(Cc1c[nH]cn1)C(=O)O	0	0	0	0	0	0	0	0	0	0	0	0	0	0	0	0	0	0	0	0	0	0	0	0	0	0	0	0	0	0	0	0	0	0	0	0	0	0	0	0	0	0	0	0	0	0	0
512	Cycloalliin	CC1CS(=O)CC(C(=O)O)N1	0	0	0	0	0	0	0	0	0	0	0	0	0	0	0	0	0	0	0	0	0	0	0	0	0	0	0	0	0	0	0	0	0	0	0	0	0	0	0	0	0	0	0	0	0	0	0
513	S-Cysteinosuccinic acid	NC(CSC(CC(=O)O)C(=O)O)C(=O)O	0	0	0	0	0	0	0	0	0	0	0	0	0	0	0	0	0	0	0	0	0	0	0	0	0	0	0	0	0	0	0	0	0	0	0	0	0	0	0	0	0	0	0	0	0	0	0
514	Syringic acid	COc1cc(C(=O)O)cc(OC)c1O	0	0	0	0	0	0	0	0	0	0	0	0	0	0	0	0	0	0	0	0	0	0	0	0	0	0	0	0	0	0	0	0	0	0	0	0	0	0	0	0	0	0	0	0	0	0	0
515	Thaumatin	O=CC=CCCCCCCCCC(=O)O	0	0	0	0	0	0	0	0	0	0	0	0	0	0	0	0	0	0	0	0	0	0	0	0	0	0	0	0	0	0	0	1	0	0	0	0	0	0	0	0	0	0	0	0	0	0	0
516	Desmosine	NC(CCCC[n+]1cc(CCC(N)C(=O)O)c(CCCC(N)C(=O)O)c(CCC(N)C(=O)O)c1)C(=O)O	0	0	0	0	0	0	0	0	0	0	0	0	0	0	0	0	0	0	0	0	0	0	0	0	0	0	0	0	0	0	0	0	1	0	0	0	0	0	0	0	0	0	0	0	0	0	0
517	Glycylglycylglycine	NCC(O)=NCC(O)=NCC(=O)O	0	0	0	0	0	0	0	0	0	0	0	0	0	0	0	0	0	0	0	0	0	0	0	0	0	0	0	0	0	0	0	0	0	0	0	0	0	0	0	0	0	0	0	0	0	0	0
518	(3b,4b,5a,24Z)-4-Methylstigmasta-7,24(28)-dien-3-ol	CC=C(CCC(C)C1CCC2C3=CCC4C(C)C(O)CCC4(C)C3CCC21C)C(C)C	0	0	0	0	0	0	0	0	0	0	0	0	0	0	0	0	0	0	0	0	0	0	0	0	0	0	0	0	0	0	0	0	0	0	0	0	0	0	0	0	0	0	0	0	0	0	0
519	N-Acetyldjenkolic acid	CC(O)=NC(CSCSCC(N)C(=O)O)C(=O)O	0	0	0	0	0	0	0	0	0	0	0	0	0	0	0	0	0	0	0	0	0	0	0	0	0	0	0	0	0	0	0	0	0	0	0	0	0	0	0	0	0	0	0	0	0	0	0
520	L-Histidine trimethylbetaine	C[N+](C)(C)C(Cc1cnc[nH]1)C(=O)[O-]	0	0	0	0	0	0	0	0	0	0	0	0	0	0	0	1	0	0	0	0	0	0	0	0	0	0	0	0	0	0	0	0	0	0	0	0	0	0	0	0	0	0	0	0	0	0	0
521	Homoserine	NC(CCO)C(=O)O	0	0	0	0	0	0	0	0	0	0	0	0	0	0	0	0	0	0	0	0	0	0	0	0	0	0	0	0	0	0	0	0	0	0	0	0	0	0	0	0	0	0	0	0	0	0	0
522	L-Homoserine	NC(CCO)C(=O)O	0	0	0	0	0	0	0	0	0	0	0	0	0	0	0	0	0	0	0	0	0	0	0	0	0	0	0	0	0	0	0	0	0	0	0	0	0	0	0	0	0	0	0	0	0	0	0
523	O-Acetylhomoserine	CC(=O)OCCC(N)C(=O)O	0	0	0	0	0	0	0	0	0	0	0	0	0	0	0	0	0	0	0	0	0	0	0	0	0	0	0	0	0	0	0	0	0	0	0	0	0	0	0	0	0	0	0	0	0	0	0
524	L-4-Hydroxyglutamine	N=C(O)C(O)CC(N)C(=O)O	0	0	0	0	0	0	0	0	0	0	0	0	0	0	0	0	0	0	0	0	0	0	0	0	0	0	0	0	0	0	0	0	0	0	0	0	0	0	0	0	0	0	0	0	0	0	0
525	L-cis-4-(Hydroxymethyl)-2-pyrrolidinecarboxylic acid	O=C(O)C1CC(CO)CN1	0	0	0	0	0	0	0	0	0	0	0	0	0	0	0	0	0	0	0	0	0	0	0	0	0	0	0	0	0	0	0	0	0	0	0	0	0	0	0	0	0	0	0	0	0	0	0
527	L-trans-5-Hydroxy-2-piperidinecarboxylic acid	O=C(O)C1CCC(O)CN1	0	0	0	0	0	0	0	0	0	0	0	0	0	0	0	0	0	0	0	0	0	0	0	0	0	0	0	0	0	0	0	0	0	0	0	0	0	0	0	0	0	0	0	0	0	0	0
528	L-cis-5-Hydroxy-2-piperidinecarboxylic acid	O=C(O)C1CCC(O)CN1	0	0	0	0	0	0	0	0	0	0	0	0	0	0	0	0	0	0	0	0	0	0	0	0	0	0	0	0	0	0	0	0	0	0	0	0	0	0	0	0	0	0	0	0	0	0	0
529	L-Hypoglycin A	C=C1CC1CC(N)C(=O)O	0	0	0	0	0	0	0	0	0	0	0	0	0	0	0	0	0	0	0	0	0	0	0	0	0	0	0	0	0	0	0	0	0	0	0	0	0	0	0	0	0	0	0	0	0	0	0
530	Hypoglycin B	C=C1CC1CC(NC(=O)CCC(N)C(=O)O)C(=O)O	0	0	0	0	0	0	0	0	0	0	0	0	0	0	0	0	0	0	0	0	0	0	0	0	0	0	0	0	0	0	0	0	0	0	0	0	0	0	0	0	0	0	0	0	0	0	0
531	Malformin	CCC(C)C1NC(=O)C(CC(C)C)NC(=O)C(C(C)C)NC(=O)C2CSSCC(NC1=O)C(=O)N2	0	0	0	0	0	0	0	0	0	0	0	0	0	0	0	0	0	0	0	0	0	0	0	0	0	0	0	0	0	0	0	0	0	0	1	0	0	0	0	0	0	0	0	0	0	0	0
532	Methionine sulfoximine	CS(=N)(=O)CCC(N)C(=O)O	0	0	0	0	0	0	0	0	0	0	0	0	0	0	0	0	0	0	0	0	0	0	0	0	0	0	0	0	0	0	0	0	0	0	0	0	0	0	0	0	0	0	0	0	0	0	0
533	(3b,5a,22x,25S)-Furostane-22-methoxy-3,26-diol 3-[rhamnosyl-(1->2)-[glucosyl-(1->3)]-glucoside] 26-glucoside	COC1(CCC(C)COC2OC(CO)C(O)C(O)C2O)OC2CC3C4CCC5CC(OC6OC(CO)C(O)C(OC7OC(CO)C(O)C(O)C7O)C6OC6OC(C)C(O)C(O)C6O)CCC5(C)C4CCC3(C)C2C1C	0	0	0	0	0	0	0	0	0	0	0	0	0	0	0	0	0	0	0	0	0	0	0	0	0	0	0	0	0	0	0	0	0	0	0	0	0	0	0	0	0	0	0	0	0	0	0
534	S-Methylcysteine sulfoxide	CS(=O)CC(N)C(=O)O	0	0	0	0	0	0	0	0	0	0	0	0	0	0	0	0	0	0	0	0	0	0	0	0	0	0	0	0	0	0	0	0	0	0	0	0	0	0	0	0	0	0	0	0	0	0	0
535	(S)C(S)S-S-Methylcysteine sulfoxide	CS(=O)CC(N)C(=O)O	0	0	0	0	0	0	0	0	0	0	0	0	0	0	0	0	0	0	0	0	0	0	0	0	0	0	0	0	0	0	0	0	0	0	0	0	0	0	0	0	0	0	0	0	0	0	0
536	L-2-Amino-4-methylenepentanedioic acid	C=C(CC(N)C(=O)O)C(=O)O	0	0	0	0	0	0	0	0	0	0	0	0	0	0	0	0	0	0	0	0	0	0	0	0	0	0	0	0	0	0	0	0	0	0	0	0	0	0	0	0	0	0	0	0	0	0	0
537	L-4-Methylene-2-pyrrolidinecarboxylic acid	C=C1CNC(C(=O)O)C1	0	0	0	0	0	0	0	0	0	0	0	0	0	0	0	0	0	0	0	0	0	0	0	0	0	0	0	0	0	0	0	0	0	0	0	0	0	0	0	0	0	0	0	0	0	0	0
538	(Ã¥Â±)-4-Methylene-2-pyrrolidinecarboxylic acid	C=C1CNC(C(=O)O)C1	0	0	0	0	0	0	0	0	0	0	0	0	0	0	0	0	0	0	0	0	0	0	0	0	0	0	0	0	0	0	0	0	0	0	0	0	0	0	0	0	0	0	0	0	0	0	0
539	L-trans-4-Methyl-2-pyrrolidinecarboxylic acid	CC1CNC(C(=O)O)C1	0	0	0	0	0	0	0	0	0	0	0	0	0	0	0	0	0	0	0	0	0	0	0	0	0	0	0	0	0	0	0	0	0	0	0	0	0	0	0	0	0	0	0	0	0	0	0
540	Lysozyme	N=C(O)CCCCC1CCSS1	0	0	0	0	0	0	0	0	0	0	0	0	0	0	0	0	0	0	0	0	0	0	0	0	0	0	0	0	0	0	0	0	0	0	1	0	0	0	0	0	0	0	0	0	0	0	0
541	Penmacric acid	NC(C(=O)O)C1CC(C(=O)O)NC1=O	0	0	0	0	0	0	0	0	0	0	0	0	0	0	0	0	0	0	0	0	0	0	0	0	0	0	0	0	0	0	0	0	0	0	0	0	0	0	0	0	0	0	0	0	0	0	0
542	Nopalinic acid	NCCCC(NC(CCC(=O)O)C(=O)O)C(=O)O	0	0	0	0	0	0	0	0	0	0	0	0	0	0	0	0	0	0	0	0	0	0	0	0	0	0	0	0	0	0	0	0	0	0	0	0	0	0	0	0	0	0	0	0	0	0	0
543	L-Phosphoarginine	N=C(NCCCC(N)C(=O)O)NP(=O)(O)O	0	0	0	0	0	0	0	0	0	0	0	0	0	0	0	0	0	0	0	0	0	0	0	0	0	0	0	0	0	0	0	0	0	0	0	0	0	0	0	0	0	0	0	0	0	0	0
544	(2S,4S)-Pinnatanine	C=CC(=CN=C(O)C(O)CC(N)C(=O)O)CO	0	0	0	0	0	0	0	0	0	0	0	0	0	0	0	0	0	0	0	0	0	0	0	0	0	0	0	0	0	0	0	0	0	0	0	0	0	0	0	0	0	0	0	0	0	0	0
545	Pipecolic acid	O=C(O)C1CCCCN1	0	0	0	0	0	0	0	0	0	0	0	0	0	0	0	0	0	0	0	0	0	0	0	0	0	0	0	0	0	0	0	0	0	0	0	0	0	0	0	0	0	0	0	0	0	0	0
546	L-Pipecolic acid	O=C(O)C1CCCCN1	0	0	0	0	0	0	0	0	0	0	0	0	0	0	0	0	0	0	0	0	0	0	0	0	0	0	0	0	0	0	0	0	0	0	0	0	0	0	0	0	0	0	0	0	0	0	0
547	Deoxyalliin	CC=CSCC(N)C(=O)O	0	0	0	0	0	0	0	0	0	0	0	0	0	0	0	0	0	0	0	0	0	0	0	0	0	0	0	0	0	0	0	0	0	0	0	0	0	0	0	0	0	0	0	0	0	0	0
548	trans-S-(1-Propenyl)-L-cysteine	CC=CSCC(N)C(=O)O	0	0	0	0	0	0	0	0	0	0	0	0	0	0	0	0	0	0	0	0	0	0	0	0	0	0	0	0	0	0	0	0	0	0	0	0	0	0	0	0	0	0	0	0	0	0	0
549	Isoalliin	CC=CS(=O)CC(N)C(=O)O	0	0	0	0	0	0	0	0	0	0	0	0	0	0	0	0	0	0	0	0	0	0	0	0	0	0	0	0	0	0	0	0	0	0	0	0	0	0	0	0	0	0	0	0	0	0	0
550	S-Propylcysteine sulfoxide	CCCS(=O)CC(N)C(=O)O	0	0	0	0	0	0	0	0	0	0	0	0	0	0	0	0	0	0	0	0	0	0	0	0	0	0	0	0	0	0	0	0	0	0	0	0	0	0	0	0	0	0	0	0	0	0	0
551	(R)C(R)S-S-Propylcysteine sulfoxide	CCCS(=O)CC(N)C(=O)O	0	0	0	0	0	0	0	0	0	0	0	0	0	0	0	0	0	0	0	0	0	0	0	0	0	0	0	0	0	0	0	0	0	0	0	0	0	0	0	0	0	0	0	0	0	0	0
552	(R)C(S)S-S-Propylcysteine sulfoxide	CCCS(=O)CC(N)C(=O)O	0	0	0	0	0	0	0	0	0	0	0	0	0	0	0	0	0	0	0	0	0	0	0	0	0	0	0	0	0	0	0	0	0	0	0	0	0	0	0	0	0	0	0	0	0	0	0
553	L-Pyridosine	Cc1cc(=O)c(O)cn1CCCCC(N)C(=O)O	0	0	0	0	0	0	0	0	0	0	0	0	0	0	0	0	0	0	0	0	0	0	0	0	0	0	0	0	0	0	0	0	0	0	0	0	0	0	0	0	0	0	0	0	0	0	0
554	2-Pyrrolidineacetic acid	O=C(O)CC1CCCN1	0	0	0	0	0	0	0	0	0	0	0	0	0	0	0	0	0	0	0	0	0	0	0	0	0	0	0	0	0	0	0	0	0	0	0	0	0	0	0	0	0	0	0	0	0	0	0
555	L-Agaridoxin	NC(CCC(=O)Nc1ccc(O)c(O)c1)C(=O)O	0	0	0	0	0	0	0	0	0	0	0	0	0	0	0	0	0	0	0	0	0	0	0	0	0	0	0	0	0	0	0	0	0	0	0	0	0	0	0	0	0	0	0	0	0	0	0
556	L-Alanine	CC(N)C(=O)O	0	0	0	0	0	0	0	0	0	0	0	0	0	0	0	0	0	0	0	0	0	0	0	0	0	0	0	0	0	0	0	0	0	0	0	0	0	0	0	0	0	0	0	0	0	0	0
557	(Ã¥Â±)-Alanine	CC(N)C(=O)O	0	0	0	0	0	0	0	0	0	0	0	0	0	0	0	0	0	0	0	0	0	0	0	0	0	0	0	0	0	0	0	0	0	0	0	0	0	0	0	0	0	0	0	0	0	0	0
558	Alliin	C=CCS(=O)CC(N)C(=O)O	0	0	0	0	0	0	0	0	0	0	0	0	0	0	0	0	0	0	0	0	0	0	0	0	0	0	0	0	0	0	0	0	0	0	0	0	0	0	0	0	0	0	0	0	0	0	0
559	Lysinoalanine	NC(CCCCNCC(N)C(=O)O)C(=O)O	0	0	0	0	0	0	0	0	0	0	0	0	0	0	0	0	0	0	0	0	0	0	0	0	0	0	0	0	0	0	0	0	0	0	0	0	0	0	0	0	0	0	0	0	0	0	0
560	DL-Ornithino-L-alanine	NC(CCCNCC(N)C(=O)O)C(=O)O	0	0	0	0	0	0	0	0	0	0	0	0	0	0	0	0	0	0	0	0	0	0	0	0	0	0	0	0	0	0	0	0	0	0	0	0	0	0	0	0	0	0	0	0	0	0	0
561	2-Amino-4-hydroxy-3-methylpentanoic acid	CC(O)C(C)C(N)C(=O)O	0	0	0	0	0	0	0	0	0	0	0	0	0	0	0	0	0	0	0	0	0	0	0	0	0	0	0	0	0	0	0	0	0	0	0	0	0	0	0	0	0	0	0	0	0	0	0
562	(2R,3R,4R)-2-Amino-4-hydroxy-3-methylpentanoic acid	CC(O)C(C)C(N)C(=O)O	0	0	0	0	0	0	0	0	0	0	0	0	0	0	0	0	0	0	0	0	0	0	0	0	0	0	0	0	0	0	0	0	0	0	0	0	0	0	0	0	0	0	0	0	0	0	0
563	L-Ribo-2-Amino-4-hydroxy-3-methylpentanoic acid	CC(O)C(C)C(N)C(=O)O	0	0	0	0	0	0	0	0	0	0	0	0	0	0	0	0	0	0	0	0	0	0	0	0	0	0	0	0	0	0	0	0	0	0	0	0	0	0	0	0	0	0	0	0	0	0	0
564	Aspergillomarasmine A	NC(CNC(CNC(CC(=O)O)C(=O)O)C(=O)O)C(=O)O	0	0	0	0	0	0	0	0	0	0	0	0	0	0	0	0	0	0	0	0	0	0	0	0	0	0	0	0	0	0	0	0	1	0	0	0	0	0	0	0	0	0	0	0	0	0	0
565	alpha-Tocopherol	Cc1c(C)c2c(c(C)c1O)CCC(C)(CCCC(C)CCCC(C)CCCC(C)C)O2	0	0	0	0	0	0	0	0	0	0	0	0	0	0	0	0	0	0	0	0	0	0	0	0	0	0	0	0	0	0	0	0	0	0	0	0	0	0	0	0	0	0	0	0	0	0	0
566	gamma-Glutaminyl-4-hydroxybenzene	N=C(O)CCC(Nc1ccc(O)cc1)C(=O)O	0	0	0	0	0	0	0	0	0	0	0	0	0	0	0	0	0	0	0	0	0	0	0	0	0	0	0	0	0	0	0	0	0	0	0	0	0	0	0	0	0	0	0	0	0	0	0
567	L-DOPA	NC(Cc1ccc(O)c(O)c1)C(=O)O	0	0	0	0	0	0	0	0	0	0	0	0	0	0	0	0	0	0	0	0	0	0	0	0	0	0	0	0	0	0	0	0	0	0	0	0	0	0	0	0	0	0	0	0	0	0	0
568	L-DOPA 3'-glucoside	NC(Cc1ccc(O)c(OC2OC(CO)C(O)C(O)C2O)c1)C(=O)O	0	0	0	0	0	0	0	0	0	0	0	0	0	0	0	0	0	0	0	0	0	0	0	0	0	0	0	0	0	0	0	0	0	0	0	0	0	0	0	0	0	0	0	0	0	0	0
569	Aspartame	COC(=O)C(Cc1ccccc1)NC(=O)C(N)CC(=O)O	0	0	0	0	0	0	0	0	0	0	0	0	0	0	0	0	0	0	0	0	0	0	0	0	0	0	0	0	0	0	0	0	0	0	0	0	0	0	0	0	0	0	0	0	0	0	0
570	L-Proline	O=C(O)C1CCCN1	0	0	0	0	0	0	0	0	0	0	0	0	0	0	0	0	0	0	0	0	0	0	0	0	0	0	0	0	0	0	0	0	0	0	0	0	0	0	0	0	0	0	0	0	0	0	0
571	Carnitine	C[N+](C)(C)CC(O)CC(=O)[O-]	0	0	0	0	0	0	0	0	0	0	0	0	0	0	0	0	0	0	0	0	0	0	0	0	0	0	0	0	0	0	0	0	0	0	0	0	0	0	0	0	0	0	0	0	0	0	0
572	Levocarnitine	C[N+](C)(C)CC(O)CC(=O)[O-]	0	0	0	0	0	0	0	0	0	0	0	0	0	0	0	0	0	0	0	0	0	0	0	0	0	0	0	0	0	0	0	0	0	0	0	0	0	0	0	0	0	0	0	0	0	0	0
573	Maduramicin	COC1CC(C)OC(OC2CC(C3OC(C)(O)C(C)CC3C)OC2C2(C)CCC(C3(C)CCC4(CC(O)C(C)C(C(C)C5OC(O)(CC(=O)O)C(C)C(OC)C5OC)O4)O3)O2)C1OC	0	0	0	0	0	0	0	0	0	0	0	0	0	0	0	0	0	0	0	0	0	0	0	0	0	0	0	0	0	0	0	0	0	1	0	0	0	0	0	0	0	0	0	0	0	0	0
574	Pyridoxine	Cc1ncc(CO)c(CO)c1O	0	0	0	0	0	0	0	0	0	0	0	0	0	0	0	0	0	0	0	0	0	0	0	0	0	0	0	0	0	0	0	0	0	0	0	0	0	0	0	0	0	0	0	0	0	0	0
575	Pyridoxine hydrochloride	Cc1ncc(CO)c(CO)c1O.Cl	0	0	0	0	0	0	0	0	0	0	0	0	0	0	0	0	0	0	0	0	0	0	0	0	0	0	0	0	0	0	0	0	0	0	0	0	0	0	0	0	0	0	0	0	0	0	0
576	Ginkgotoxin	COCc1c(CO)cnc(C)c1O	0	0	0	0	0	0	0	0	0	0	0	0	0	0	0	0	0	0	0	0	0	0	0	0	0	0	0	0	0	0	0	0	0	0	0	0	0	0	0	0	0	0	0	0	0	0	0
577	Amyl 2-furoate	CCCCCOC(=O)c1ccco1	0	0	0	0	0	0	0	0	0	0	0	0	0	0	0	0	0	0	0	0	0	0	0	0	0	0	0	0	0	0	0	0	0	0	0	0	0	0	0	0	0	0	0	0	0	0	0
578	Xanthotoxol	O=c1ccc2cc3ccoc3c(O)c2o1	0	0	0	0	0	0	0	0	0	0	0	0	0	0	0	0	0	0	0	0	0	0	0	0	0	0	0	0	0	0	0	0	0	0	0	0	0	0	0	0	0	0	0	0	0	0	0
579	Oryzarol	C=CCc1ccc(OC(=O)CCCCCCCCCCCCCCC)c(OC)c1	0	0	0	0	0	0	0	0	0	0	0	0	0	0	0	0	0	0	0	0	0	0	0	0	0	0	0	0	0	0	0	1	0	0	0	0	0	0	0	0	0	0	0	0	0	0	0
580	Xanthoxylol	COc1cc(C2OCC3C(c4ccc5c(c4)OCO5)OCC23)ccc1O	0	0	0	0	0	0	0	0	0	0	0	0	0	0	0	0	0	0	0	0	0	0	0	0	0	0	0	0	0	0	0	0	0	0	0	0	0	0	0	0	0	0	0	0	0	0	0
581	Xerocomic acid	O=C(O)C(=C1OC(=O)C(c2ccc(O)c(O)c2)=C1O)c1ccc(O)cc1	0	0	0	0	0	0	0	0	0	0	0	0	0	0	0	0	0	0	0	0	0	0	0	0	0	0	0	0	0	0	0	0	0	0	0	0	0	0	0	0	0	0	0	0	0	0	0
582	Zapotin	COc1cccc(OC)c1-c1cc(=O)c2c(OC)c(OC)ccc2o1	0	0	0	0	0	0	0	0	0	0	0	0	0	0	0	0	0	0	0	0	0	0	0	0	0	0	0	0	0	0	0	0	0	0	0	0	0	0	0	0	0	0	0	0	0	0	0
583	(E)-2,4,4'-Trihydroxychalcone	O=C(C=Cc1ccc(O)cc1O)c1ccc(O)cc1	0	0	0	0	0	0	0	0	0	0	0	0	0	0	0	0	0	0	0	0	0	0	0	0	0	0	0	0	0	0	0	0	0	0	0	0	0	0	0	0	0	0	0	0	0	0	0
584	Gentisein	O=c1c2cc(O)ccc2oc2cc(O)cc(O)c12	0	0	0	0	0	0	0	0	0	0	0	0	0	0	0	0	0	0	0	0	0	0	0	0	0	0	0	0	0	0	0	0	0	0	0	0	0	0	0	0	0	0	0	0	0	0	0
585	Asteltoxin	CCC1OC2OC(C=CC=CC=Cc3oc(=O)cc(OC)c3C)C(O)C2(C)C1(C)O	0	0	0	0	0	0	0	0	0	0	0	0	0	0	0	0	0	0	0	0	0	0	0	0	0	0	0	0	0	0	0	0	0	0	0	0	0	0	0	0	0	0	0	0	0	0	0
586	Erosnin	O=c1oc2cc3occc3cc2c2oc3cc4c(cc3c12)OCO4	0	0	0	0	0	0	0	0	0	0	0	0	0	0	0	0	0	0	0	0	0	0	0	0	0	0	0	0	0	0	0	0	0	0	0	0	0	0	0	0	0	0	0	0	0	0	0
587	Eugenitol	Cc1cc(=O)c2c(O)c(C)c(O)cc2o1	0	0	0	0	0	0	0	0	0	0	0	0	0	0	0	0	0	0	0	0	0	0	0	0	0	0	0	0	0	0	0	0	0	0	0	0	0	0	0	0	0	0	0	0	0	0	0
588	Eugenitin	COc1cc2oc(C)cc(=O)c2c(O)c1C	0	0	0	0	0	0	0	0	0	0	0	0	0	0	0	0	0	0	0	0	0	0	0	0	0	0	0	0	0	0	0	0	0	0	0	0	0	0	0	0	0	0	0	0	0	0	0
589	Dolichin B	C=C(C)C(O)Cc1c(O)ccc2c1OC1c3ccc(O)cc3OCC21	0	0	0	0	0	0	0	0	0	0	0	0	0	0	0	0	0	0	0	0	0	0	0	0	0	0	0	0	0	0	0	0	0	0	0	0	0	0	0	0	0	0	0	0	0	0	0
590	Dolichin A	C=C(C)C(O)Cc1c(O)ccc2c1OC1c3ccc(O)cc3OCC21	0	0	0	0	0	0	0	0	0	0	0	0	0	0	0	0	0	0	0	0	0	0	0	0	0	0	0	0	0	0	0	0	0	0	0	0	0	0	0	0	0	0	0	0	0	0	0
591	Eupatilin	COc1ccc(-c2cc(=O)c3c(O)c(OC)c(O)cc3o2)cc1OC	0	0	0	0	0	0	0	0	0	0	0	0	0	0	0	0	0	0	0	0	0	0	0	0	0	0	0	0	0	0	0	0	0	0	0	0	0	0	0	0	0	0	0	0	0	0	0
592	Isodillapiole	CC=Cc1cc2c(c(OC)c1OC)OCO2	0	0	0	0	0	0	0	0	0	0	0	0	0	0	0	0	0	0	0	0	0	0	0	0	0	0	0	0	0	0	0	0	0	0	0	0	0	0	0	0	0	0	0	0	0	0	0
593	Isocycloheterophyllin	CC(C)=CCc1c2c(c3oc4c(c(=O)c3c1O)CC(=C(C)C)Oc1cc(O)c(O)cc1-4)C=CC(C)(C)O2	0	0	0	0	0	0	0	0	0	0	0	0	0	0	0	0	0	0	0	0	0	0	0	0	0	0	0	0	0	0	0	0	0	0	0	0	0	0	0	0	0	0	0	0	0	0	0
594	Isoeugenitol	Cc1cc(=O)c2c(O)cc(O)c(C)c2o1	0	0	0	0	0	0	0	0	0	0	0	0	0	0	0	0	0	0	0	0	0	0	0	0	0	0	0	0	0	0	0	0	0	0	0	0	0	0	0	0	0	0	0	0	0	0	0
595	Isoeugenitin	COc1cc(O)c2c(=O)cc(C)oc2c1C	0	0	0	0	0	0	0	0	0	0	0	0	0	0	0	0	0	0	0	0	0	0	0	0	0	0	0	0	0	0	0	0	0	0	0	0	0	0	0	0	0	0	0	0	0	0	0
596	Gingerdiones	CCCCCC(=O)CC(=O)CCc1ccc(O)c(OC)c1	0	0	0	0	0	0	0	0	0	0	0	0	0	0	0	0	0	0	0	0	0	0	0	0	0	0	0	0	0	0	0	0	0	0	0	0	0	0	0	0	0	0	0	0	0	0	0
597	[6]-Dehydrogingerdione	CCCCCC(=O)CC(=O)C=Cc1ccc(O)c(OC)c1	0	0	0	0	0	0	0	0	0	0	0	0	0	0	0	0	0	0	0	0	0	0	0	0	0	0	0	0	0	0	0	0	0	0	0	0	0	0	0	0	0	0	0	0	0	0	0
598	[10]-Gingerdione	CCCCCCCCCC(=O)CC(=O)CCc1ccc(O)c(OC)c1	0	0	0	0	0	0	0	0	0	0	0	0	0	0	0	0	0	0	0	0	0	0	0	0	0	0	0	0	0	0	0	1	0	0	0	0	0	0	0	0	0	0	0	0	0	0	0
599	[10]-Dehydrogingerdione	CCCCCCCCCC(=O)CC(=O)C=Cc1ccc(O)c(OC)c1	0	0	0	0	0	0	0	0	0	0	0	0	0	0	0	0	0	0	0	0	0	0	0	0	0	0	0	0	0	0	0	1	0	0	0	0	0	0	0	0	0	0	0	0	0	0	0
600	Isolimocitrol	COc1ccc(-c2oc3c(OC)c(O)c(OC)c(O)c3c(=O)c2O)cc1O	0	0	0	0	0	0	0	0	0	0	0	0	0	0	0	0	0	0	0	0	0	0	0	0	0	0	0	0	0	0	0	0	0	0	0	0	0	0	0	0	0	0	0	0	0	0	0
601	Isomangiferin	O=c1c2cc(O)c(O)cc2oc2c(C3OC(CO)C(O)C(O)C3O)c(O)cc(O)c12	0	0	0	0	0	0	0	0	0	0	0	0	0	0	0	0	0	0	0	0	0	0	0	0	0	0	0	0	0	0	0	0	0	0	0	0	0	0	0	0	0	0	0	0	0	0	0
602	Isoorientin 2''-glucoside	O=c1cc(-c2ccc(O)c(O)c2)oc2cc(O)c(C3OC(CO)C(O)C(O)C3OC3OC(CO)C(O)C(O)C3O)c(O)c12	0	0	0	0	0	0	0	0	0	0	0	0	0	0	0	0	0	0	0	0	0	0	0	0	0	0	0	0	0	0	0	0	0	0	0	0	0	0	0	0	0	0	0	0	0	0	0
603	Isorhamnetin 3-dirhamnoside	CC(C)CC(NC(=O)C(CC(C)C)NC(=O)C(C[SeH])NC(=O)C(N)CC(N)=O)C(=O)O	0	0	0	0	0	0	0	0	0	0	0	0	0	0	0	0	0	0	0	0	0	0	0	0	0	0	0	0	0	0	0	0	0	0	0	0	0	0	0	0	0	0	0	0	0	0	0
604	Isorhamnetin	COc1cc(-c2oc3cc(O)cc(O)c3c(=O)c2O)ccc1O	0	0	0	0	0	0	0	0	0	0	0	0	0	0	0	0	0	0	0	0	0	0	0	0	0	0	0	0	0	0	0	0	0	0	0	0	0	0	0	0	0	0	0	0	0	0	0
605	Isorhamnetin 3-galactoside	COc1cc(-c2oc3cc(O)cc(O)c3c(=O)c2OC2OC(CO)C(O)C(O)C2O)ccc1O	0	0	0	0	0	0	0	0	0	0	0	0	0	0	0	0	0	0	0	0	0	0	0	0	0	0	0	0	0	0	0	0	0	0	0	0	0	0	0	0	0	0	0	0	0	0	0
606	Isorhamnetin 7-glucoside	COc1cc(-c2oc3cc(OC4OC(CO)C(O)C(O)C4O)cc(O)c3c(=O)c2O)ccc1O	0	0	0	0	0	0	0	0	0	0	0	0	0	0	0	0	0	0	0	0	0	0	0	0	0	0	0	0	0	0	0	0	0	0	0	0	0	0	0	0	0	0	0	0	0	0	0
607	Isorhamnetin 3-sophoroside 7-glucoside	COc1cc(-c2oc3cc(OC4OC(CO)C(O)C(O)C4O)cc(O)c3c(=O)c2OC2OC(CO)C(O)C(O)C2OC2OC(CO)C(O)C(O)C2O)ccc1O	0	0	0	0	0	0	0	0	0	0	0	0	0	0	0	0	0	0	0	0	0	0	0	0	0	0	0	0	0	0	0	0	0	0	0	0	0	0	0	0	0	0	0	0	0	0	0
608	Isorhamnetin 7-rhamnoside	COc1cc(-c2oc3cc(OC4OC(C)C(O)C(O)C4O)cc(O)c3c(=O)c2O)ccc1O	0	0	0	0	0	0	0	0	0	0	0	0	0	0	0	0	0	0	0	0	0	0	0	0	0	0	0	0	0	0	0	0	0	0	0	0	0	0	0	0	0	0	0	0	0	0	0
609	Isorhamnetin 3-rutinoside	COc1cc(-c2oc3cc(O)cc(O)c3c(=O)c2OC2OC(COC3OC(C)C(O)C(O)C3O)C(O)C(O)C2O)ccc1O	0	0	0	0	0	0	0	0	0	0	0	0	0	0	0	0	0	0	0	0	0	0	0	0	0	0	0	0	0	0	0	0	0	0	0	0	0	0	0	0	0	0	0	0	0	0	0
610	Isosakuranetin	COc1ccc(C2CC(=O)c3c(O)cc(O)cc3O2)cc1	0	0	0	0	0	0	0	0	0	0	0	0	0	0	0	0	0	0	0	0	0	0	0	0	0	0	0	0	0	0	0	0	0	0	0	0	0	0	0	0	0	0	0	0	0	0	0
611	Isosakuranetin 7-glucoside	COc1ccc(C2CC(=O)c3c(O)cc(OC4OC(CO)C(O)C(O)C4O)cc3O2)cc1	0	0	0	0	0	0	0	0	0	0	0	0	0	0	0	0	0	0	0	0	0	0	0	0	0	0	0	0	0	0	0	0	0	0	0	0	0	0	0	0	0	0	0	0	0	0	0
612	Didymin	COc1ccc(C2CC(=O)c3c(O)cc(OC4OC(COC5OC(C)C(O)C(O)C5O)C(O)C(O)C4O)cc3O2)cc1	0	0	0	0	0	0	0	0	0	0	0	0	0	0	0	0	0	0	0	0	0	0	0	0	0	0	0	0	0	0	0	0	0	0	0	0	0	0	0	0	0	0	0	0	0	0	0
613	Isotheaflavin	O=c1c(O)cc(C2Oc3cc(O)cc(O)c3CC2O)cc2c(C3Oc4cc(O)cc(O)c4CC3O)cc(O)c(O)c12	0	0	0	0	0	0	0	0	0	0	0	0	0	0	0	0	0	0	0	0	0	0	0	0	0	0	0	0	0	0	0	0	0	0	0	0	0	0	0	0	0	0	0	0	0	0	0
614	Isovitexin	O=c1cc(-c2ccc(O)cc2)oc2cc(O)c(C3OC(CO)C(O)C(O)C3O)c(O)c12	0	0	0	0	0	0	0	0	0	0	0	0	0	0	0	0	0	0	0	0	0	0	0	0	0	0	0	0	0	0	0	0	0	0	0	0	0	0	0	0	0	0	0	0	0	0	0
615	Isovitexin 2''-glucoside	O=c1cc(-c2ccc(O)cc2)oc2cc(O)c(C3OC(CO)C(O)C(O)C3OC3OC(CO)C(O)C(O)C3O)c(O)c12	0	0	0	0	0	0	0	0	0	0	0	0	0	0	0	0	0	0	0	0	0	0	0	0	0	0	0	0	0	0	0	0	0	0	0	0	0	0	0	0	0	0	0	0	0	0	0
616	(+)-Isoxanthochymol	CC(C)=CCC1CC23CC(CC=C(C)C)C(C)(C)C(CC=C(C)C)(C(=O)C(C(=O)c4ccc(O)c(O)c4)=C2OC1(C)C)C3=O	0	0	0	0	0	0	0	0	0	0	0	0	0	0	0	0	0	0	0	0	0	0	0	0	0	0	0	0	0	0	0	0	0	0	0	0	0	0	0	0	0	0	0	0	0	0	0
617	(-)-Isoxanthochymol	CC(C)=CCC1CC23CC(CC=C(C)C)C(C)(C)C(CC=C(C)C)(C(=O)C(C(=O)c4ccc(O)c(O)c4)=C2OC1(C)C)C3=O	0	0	0	0	0	0	0	0	0	0	0	0	0	0	0	0	0	0	0	0	0	0	0	0	0	0	0	0	0	0	0	0	0	0	0	0	0	0	0	0	0	0	0	0	0	0	0
618	Integrin	COc1cc(O)c2c(=O)c(CC=C(C)C)c(-c3ccc(O)cc3O)oc2c1	0	0	0	0	0	0	0	0	0	0	0	0	0	0	0	0	0	0	0	0	0	0	0	0	0	0	0	0	0	0	0	0	0	0	0	0	0	0	0	0	0	0	0	0	0	0	0
619	Allyl propionate	C=CCOC(=O)CC	0	0	0	0	0	0	0	0	0	0	0	0	0	0	0	0	0	0	0	0	0	0	0	0	0	0	0	0	0	0	0	0	0	0	0	0	0	0	0	0	0	0	0	0	0	0	0
620	Farnesiferol A	C=C1CCC2C(C)(C)C(O)CCC2(C)C1COc1ccc2ccc(=O)oc2c1	0	0	0	0	0	0	0	0	0	0	0	0	0	0	0	0	0	0	0	0	0	0	0	0	0	0	0	0	0	0	0	0	0	0	0	0	0	0	0	0	0	0	0	0	0	0	0
621	Farnesiferol B	C=C1CCC(O)C(C)(C)C1CCC(C)=CCOc1ccc2ccc(=O)oc2c1	0	0	0	0	0	0	0	0	0	0	0	0	0	0	0	0	0	0	0	0	0	0	0	0	0	0	0	0	0	0	0	0	0	0	0	0	0	0	0	0	0	0	0	0	0	0	0
622	(-)-Farnesiferol C	CC(=CCOc1ccc2ccc(=O)oc2c1)CCC1C2(C)CCC(O2)C1(C)C	0	0	0	0	0	0	0	0	0	0	0	0	0	0	0	0	0	0	0	0	0	0	0	0	0	0	0	0	0	0	0	0	0	0	0	0	0	0	0	0	0	0	0	0	0	0	0
623	Isoferreirin	COc1cc(O)ccc1C1COc2cc(O)cc(O)c2C1=O	0	0	0	0	0	0	0	0	0	0	0	0	0	0	0	0	0	0	0	0	0	0	0	0	0	0	0	0	0	0	0	0	0	0	0	0	0	0	0	0	0	0	0	0	0	0	0
624	Fisetin	O=c1c(O)c(-c2ccc(O)c(O)c2)oc2cc(O)ccc12	0	0	0	0	0	0	0	0	0	0	0	0	0	0	0	0	0	0	0	0	0	0	0	0	0	0	0	0	0	0	0	0	0	0	0	0	0	0	0	0	0	0	0	0	0	0	0
625	3,3',7-Trihydroxy-4'-methoxyflavone	COc1ccc(-c2oc3cc(O)ccc3c(=O)c2O)cc1O	0	0	0	0	0	0	0	0	0	0	0	0	0	0	0	0	0	0	0	0	0	0	0	0	0	0	0	0	0	0	0	0	0	0	0	0	0	0	0	0	0	0	0	0	0	0	0
626	Formononetin 7-(6''-malonylglucoside)	COc1ccc(-c2coc3cc(OC4OC(COC(=O)CC(=O)O)C(O)C(O)C4O)ccc3c2=O)cc1	0	0	0	0	0	0	0	0	0	0	0	0	0	0	0	0	0	0	0	0	0	0	0	0	0	0	0	0	0	0	0	0	0	0	0	0	0	0	0	0	0	0	0	0	0	0	0
627	Formononetin 7-(6''-methylmalonylglucoside)	COC(=O)CC(=O)OCC1OC(Oc2ccc3c(=O)c(-c4ccc(OC)cc4)coc3c2)C(O)C(O)C1O	0	0	0	0	0	0	0	0	0	0	0	0	0	0	0	0	0	0	0	0	0	0	0	0	0	0	0	0	0	0	0	0	0	0	0	0	0	0	0	0	0	0	0	0	0	0	0
628	Trigoforin	Cc1ccc2c(C)c(C)c(=O)oc2c1	0	0	0	0	0	0	0	0	0	0	0	0	0	0	0	0	0	0	0	0	0	0	0	0	0	0	0	0	0	0	0	0	0	0	0	0	0	0	0	0	0	0	0	0	0	0	0
629	Fukiic acid	O=C(O)C(O)C(O)(Cc1ccc(O)c(O)c1)C(=O)O	0	0	0	0	0	0	0	0	0	0	0	0	0	0	0	0	0	0	0	0	0	0	0	0	0	0	0	0	0	0	0	0	0	0	0	0	0	0	0	0	0	0	0	0	0	0	0
630	Dimethyl fukiic acid	COC(=O)C(O)C(O)(Cc1ccc(O)c(O)c1)C(=O)OC	0	0	0	0	0	0	0	0	0	0	0	0	0	0	0	0	0	0	0	0	0	0	0	0	0	0	0	0	0	0	0	0	0	0	0	0	0	0	0	0	0	0	0	0	0	0	0
631	3'-Methoxyfukiic acid	COc1cc(CC(O)(C(=O)O)C(O)C(=O)O)ccc1O	0	0	0	0	0	0	0	0	0	0	0	0	0	0	0	0	0	0	0	0	0	0	0	0	0	0	0	0	0	0	0	0	0	0	0	0	0	0	0	0	0	0	0	0	0	0	0
632	Fukinolic acid	O=C(C=Cc1ccc(O)c(O)c1)OC(C(=O)O)C(O)(Cc1ccc(O)c(O)c1)C(=O)O	0	0	0	0	0	0	0	0	0	0	0	0	0	0	0	0	0	0	0	0	0	0	0	0	0	0	0	0	0	0	0	0	0	0	0	0	0	0	0	0	0	0	0	0	0	0	0
633	Kaempferol	O=c1c(O)c(-c2ccc(O)cc2)oc2cc(O)cc(O)c12	0	0	0	0	0	0	0	0	0	0	0	0	0	0	0	0	0	0	0	0	0	0	0	0	0	0	0	0	0	0	0	0	0	0	0	0	0	0	0	0	0	0	0	0	0	0	0
634	Kaempferol 3-glucuronide	O=C(O)C1OC(Oc2c(-c3ccc(O)cc3)oc3cc(O)cc(O)c3c2=O)C(O)C(O)C1O	0	0	0	0	0	0	0	0	0	0	0	0	0	0	0	0	0	0	0	0	0	0	0	0	0	0	0	0	0	0	0	0	0	0	0	0	0	0	0	0	0	0	0	0	0	0	0
635	Kaempferol 7-rhamnofuranoside	CC(O)C1OC(Oc2cc(O)c3c(=O)c(O)c(-c4ccc(O)cc4)oc3c2)C(O)C1O	0	0	0	0	0	0	0	0	0	0	0	0	0	0	0	0	0	0	0	0	0	0	0	0	0	0	0	0	0	0	0	0	0	0	0	0	0	0	0	0	0	0	0	0	0	0	0
636	Kaempferol 3-arabinoside	O=c1c(OC2OC(CO)C(O)C2O)c(-c2ccc(O)cc2)oc2cc(O)cc(O)c12	0	0	0	0	0	0	0	0	0	0	0	0	0	0	0	0	0	0	0	0	0	0	0	0	0	0	0	0	0	0	0	0	0	0	0	0	0	0	0	0	0	0	0	0	0	0	0
637	Kaempferol 3-(3'',6''-diacetyl-2'',4''-di-p-coumaroylrhamnoside)	CC(=O)OCC1OC(Oc2c(-c3ccc(O)cc3)oc3cc(O)cc(O)c3c2=O)C(OC(=O)C=Cc2ccc(O)cc2)C(OC(C)=O)C1OC(=O)C=Cc1ccc(O)cc1	0	0	0	0	0	0	0	0	0	0	0	0	0	0	0	0	0	0	0	0	0	0	0	0	0	0	0	0	0	0	0	0	0	0	0	0	0	0	0	0	0	0	0	0	0	0	0
638	Cannithrene 2	COc1cc(O)c2c(c1)CCc1ccc(OC)c(O)c1-2	0	0	0	0	0	0	0	0	0	0	0	0	0	0	0	0	0	0	0	0	0	0	0	0	0	0	0	0	0	0	0	0	0	0	0	0	0	0	0	0	0	0	0	0	0	0	0
639	Marindinin	COC1=CC(=O)OC(CCc2ccccc2)C1	0	0	0	0	0	0	0	0	0	0	0	0	0	0	0	0	0	0	0	0	0	0	0	0	0	0	0	0	0	0	0	0	0	0	0	0	0	0	0	0	0	0	0	0	0	0	0
640	Kuwanon A	CC(C)=CCc1c(-c2ccc(O)c3c2OC(C)(C)C=C3)oc2cc(O)cc(O)c2c1=O	0	0	0	0	0	0	0	0	0	0	0	0	0	0	0	0	0	0	0	0	0	0	0	0	0	0	0	0	0	0	0	0	0	0	0	0	0	0	0	0	0	0	0	0	0	0	0
641	Kuwanon B	CC(C)=CCc1c(-c2ccc3c(c2O)C=CC(C)(C)O3)oc2cc(O)cc(O)c2c1=O	0	0	0	0	0	0	0	0	0	0	0	0	0	0	0	0	0	0	0	0	0	0	0	0	0	0	0	0	0	0	0	0	0	0	0	0	0	0	0	0	0	0	0	0	0	0	0
642	Mulberrin	CC(C)=CCc1c(-c2ccc(O)cc2O)oc2c(CC=C(C)C)c(O)cc(O)c2c1=O	0	0	0	0	0	0	0	0	0	0	0	0	0	0	0	0	0	0	0	0	0	0	0	0	0	0	0	0	0	0	0	0	0	0	0	0	0	0	0	0	0	0	0	0	0	0	0
643	Laccaic acid D	Cc1c(C(=O)O)c(O)cc2c1C(=O)c1c(O)cc(O)cc1C2=O	0	0	0	0	0	0	0	0	0	0	0	0	0	0	0	0	0	0	0	0	0	0	0	0	0	0	0	0	0	0	0	0	0	0	0	0	0	0	0	0	0	0	0	0	0	0	0
644	Garcinone A	CC(C)=CCc1c(O)c(CC=C(C)C)c2oc3cc(O)ccc3c(=O)c2c1O	0	0	0	0	0	0	0	0	0	0	0	0	0	0	0	0	0	0	0	0	0	0	0	0	0	0	0	0	0	0	0	0	0	0	0	0	0	0	0	0	0	0	0	0	0	0	0
645	Garcinone B	CC(C)=CCc1c(O)cc2oc3cc(O)c4c(c3c(=O)c2c1O)C=CC(C)(C)O4	0	0	0	0	0	0	0	0	0	0	0	0	0	0	0	0	0	0	0	0	0	0	0	0	0	0	0	0	0	0	0	0	0	0	0	0	0	0	0	0	0	0	0	0	0	0	0
646	Garcinone C	CC(C)=CCc1c(O)cc2oc3cc(O)c(O)c(CCC(C)(C)O)c3c(=O)c2c1O	0	0	0	0	0	0	0	0	0	0	0	0	0	0	0	0	0	0	0	0	0	0	0	0	0	0	0	0	0	0	0	0	0	0	0	0	0	0	0	0	0	0	0	0	0	0	0
647	4',5-Dihydroxy-7-methoxy-6-methylflavone	COc1cc2oc(-c3ccc(O)cc3)cc(=O)c2c(O)c1C	0	0	0	0	0	0	0	0	0	0	0	0	0	0	0	0	0	0	0	0	0	0	0	0	0	0	0	0	0	0	0	0	0	0	0	0	0	0	0	0	0	0	0	0	0	0	0
648	Myricatin	O=C(OC1C(=O)c2c(O)cc(O)cc2OC1c1cc(O)c(O)c(OS(=O)(=O)O)c1)c1cc(O)c(O)c(O)c1	0	0	0	0	0	0	0	0	0	0	0	0	0	0	0	0	0	0	0	0	0	0	0	0	0	0	0	0	0	0	0	0	0	0	0	0	0	1	0	0	0	0	0	0	0	0	0
649	Licochalcone A	C=CC(C)(C)c1cc(C=CC(=O)c2ccc(O)cc2)c(OC)cc1O	0	0	0	0	0	0	0	0	0	0	0	0	0	0	0	0	0	0	0	0	0	0	0	0	0	0	0	0	0	0	0	0	0	0	0	0	0	0	0	0	0	0	0	0	0	0	0
651	Licoricone	COc1cc(O)c(-c2coc3cc(O)ccc3c2=O)c(OC)c1CC=C(C)C	0	0	0	0	0	0	0	0	0	0	0	0	0	0	0	0	0	0	0	0	0	0	0	0	0	0	0	0	0	0	0	0	0	0	0	0	0	0	0	0	0	0	0	0	0	0	0
652	Limocitrin	COc1cc(-c2oc3c(OC)c(O)cc(O)c3c(=O)c2O)ccc1O	0	0	0	0	0	0	0	0	0	0	0	0	0	0	0	0	0	0	0	0	0	0	0	0	0	0	0	0	0	0	0	0	0	0	0	0	0	0	0	0	0	0	0	0	0	0	0
653	Limocitrin 3-glucoside	COc1cc(-c2oc3c(OC)c(O)cc(O)c3c(=O)c2OC2OC(CO)C(O)C(O)C2O)ccc1O	0	0	0	0	0	0	0	0	0	0	0	0	0	0	0	0	0	0	0	0	0	0	0	0	0	0	0	0	0	0	0	0	0	0	0	0	0	0	0	0	0	0	0	0	0	0	0
654	Liqcoumarin	CC(=O)c1ccc2oc(=O)cc(C)c2c1O	0	0	0	0	0	0	0	0	0	0	0	0	0	0	0	0	0	0	0	0	0	0	0	0	0	0	0	0	0	0	0	0	0	0	0	0	0	0	0	0	0	0	0	0	0	0	0
655	Liquiritigenin	O=C1CC(c2ccc(O)cc2)Oc2cc(O)ccc21	0	0	0	0	0	0	0	0	0	0	0	0	0	0	0	0	0	0	0	0	0	0	0	0	0	0	0	0	0	0	0	0	0	0	0	0	0	0	0	0	0	0	0	0	0	0	0
656	Liquiritin	O=C1CC(c2ccc(OC3OC(CO)C(O)C(O)C3O)cc2)Oc2cc(O)ccc21	0	0	0	0	0	0	0	0	0	0	0	0	0	0	0	0	0	0	0	0	0	0	0	0	0	0	0	0	0	0	0	0	0	0	0	0	0	0	0	0	0	0	0	0	0	0	0
657	Galangin	O=c1c(O)c(-c2ccccc2)oc2cc(O)cc(O)c12	0	0	0	0	0	0	0	0	0	0	0	0	0	0	0	0	0	0	0	0	0	0	0	0	0	0	0	0	0	0	0	0	0	0	0	0	0	0	0	0	0	0	0	0	0	0	0
658	3-Methylgalangin	COc1c(-c2ccccc2)oc2cc(O)cc(O)c2c1=O	0	0	0	0	0	0	0	0	0	0	0	0	0	0	0	0	0	0	0	0	0	0	0	0	0	0	0	0	0	0	0	0	0	0	0	0	0	0	0	0	0	0	0	0	0	0	0
659	Medicarpin	COc1ccc2c(c1)OC1c3ccc(O)cc3OCC21	0	0	0	0	0	0	0	0	0	0	0	0	0	0	0	0	0	0	0	0	0	0	0	0	0	0	0	0	0	0	0	0	0	0	0	0	0	0	0	0	0	0	0	0	0	0	0
660	Neohesperidose	CC1OC(OC2C(O)OC(CO)C(O)C2O)C(O)C(O)C1O	0	0	0	0	0	0	0	0	0	0	0	0	0	0	0	0	0	0	0	0	0	0	0	0	0	0	0	0	0	0	0	0	0	0	0	0	0	0	0	0	0	0	0	0	0	0	0
661	Raffinose	OCC1OC(OCC2OC(OC3(CO)OC(CO)C(O)C3O)C(O)C(O)C2O)C(O)C(O)C1O	0	0	0	0	0	0	0	0	0	0	0	0	0	0	0	0	0	0	0	0	0	0	0	0	0	0	0	0	0	0	0	0	0	0	0	0	0	0	0	0	0	0	0	0	0	0	0
662	Gallic acid	O=C(O)c1cc(O)c(O)c(O)c1	0	0	0	0	0	0	0	0	0	0	0	0	0	0	0	0	0	0	0	0	0	0	0	0	0	0	0	0	0	0	0	0	0	0	0	0	0	1	0	0	0	0	0	0	0	0	0
663	Methyl gallate	COC(=O)c1cc(O)c(O)c(O)c1	0	0	0	0	0	0	0	0	0	0	0	0	0	0	0	0	0	0	0	0	0	0	0	0	0	0	0	0	0	0	0	0	0	0	0	0	0	1	0	0	0	0	0	0	0	0	0
664	5-Hydroxy-7-(4-hydroxy-3-methoxyphenyl)-1-phenyl-3-heptanone	COc1cc(CCC(O)CC(=O)CCc2ccccc2)ccc1O	0	0	0	0	0	0	0	0	0	0	0	0	0	0	0	0	0	0	0	0	0	0	0	0	0	0	0	0	0	0	0	0	0	0	0	0	0	0	0	0	0	0	0	0	0	0	0
665	7-(4-Hydroxy-3-methoxyphenyl)-5-methoxy-1-phenyl-3-heptanone	COc1cc(CCC(CC(=O)CCc2ccccc2)OC)ccc1O	0	0	0	0	0	0	0	0	0	0	0	0	0	0	0	0	0	0	0	0	0	0	0	0	0	0	0	0	0	0	0	0	0	0	0	0	0	0	0	0	0	0	0	0	0	0	0
666	Sanguiin H6	O=C(OC1OC2COC(=O)c3cc(O)c(O)c(O)c3-c3c(cc(O)c(O)c3O)C(=O)OC2C2OC(=O)c3cc(O)c(O)c(O)c3-c3c(cc(O)c(O)c3O)C(=O)OC12)c1cc(O)c(O)c(Oc2c(O)c(O)c(O)c3c2C(=O)OC2C(COC(=O)c4cc(O)c(O)c(O)c4-3)OC(OC(=O)c3cc(O)c(O)c(O)c3)C3OC(=O)c4cc(O)c(O)c(O)c4-c4c(cc(O)c(O)c4O)C(=O)OC23)c1	0	0	0	0	0	0	0	0	0	0	0	0	0	0	0	0	0	0	0	0	0	0	0	0	0	0	0	0	0	0	0	0	0	0	0	0	0	1	0	0	0	0	0	0	0	0	0
667	Melilotocarpan B	COc1ccc2c(c1O)OCC1c3ccc(O)cc3OC21	0	0	0	0	0	0	0	0	0	0	0	0	0	0	0	0	0	0	0	0	0	0	0	0	0	0	0	0	0	0	0	0	0	0	0	0	0	0	0	0	0	0	0	0	0	0	0
668	Gemin D	O=C(OC1C(O)C(O)OC2COC(=O)c3cc(O)c(O)c(O)c3-c3c(cc(O)c(O)c3O)C(=O)OC21)c1cc(O)c(O)c(O)c1	0	0	0	0	0	0	0	0	0	0	0	0	0	0	0	0	0	0	0	0	0	0	0	0	0	0	0	0	0	0	0	0	0	0	0	0	0	1	0	0	0	0	0	0	0	0	0
669	6''-O-Acetylgenistin	CC(=O)OCC1OC(Oc2cc(O)c3c(=O)c(-c4ccc(O)cc4)coc3c2)C(O)C(O)C1O	0	0	0	0	0	0	0	0	0	0	0	0	0	0	0	0	0	0	0	0	0	0	0	0	0	0	0	0	0	0	0	0	0	0	0	0	0	0	0	0	0	0	0	0	0	0	0
670	6''-Malonylgenistin	O=C(O)CC(=O)OCC1OC(Oc2cc(O)c3c(=O)c(-c4ccc(O)cc4)coc3c2)C(O)C(O)C1O	0	0	0	0	0	0	0	0	0	0	0	0	0	0	0	0	0	0	0	0	0	0	0	0	0	0	0	0	0	0	0	0	0	0	0	0	0	0	0	0	0	0	0	0	0	0	0
671	Glabrene	CC1(C)C=Cc2c(O)ccc(C3=Cc4ccc(O)cc4OC3)c2O1	0	0	0	0	0	0	0	0	0	0	0	0	0	0	0	0	0	0	0	0	0	0	0	0	0	0	0	0	0	0	0	0	0	0	0	0	0	0	0	0	0	0	0	0	0	0	0
672	(S)-4',7-Dihydroxy-3',8-diprenylflavanone	CC(C)=CCc1cc(C2CC(=O)c3ccc(O)c(CC=C(C)C)c3O2)ccc1O	0	0	0	0	0	0	0	0	0	0	0	0	0	0	0	0	0	0	0	0	0	0	0	0	0	0	0	0	0	0	0	0	0	0	0	0	0	0	0	0	0	0	0	0	0	0	0
673	3-Hydroxyglabrol	CC(C)=CCc1cc(C2Oc3c(ccc(O)c3CC=C(C)C)C(=O)C2O)ccc1O	0	0	0	0	0	0	0	0	0	0	0	0	0	0	0	0	0	0	0	0	0	0	0	0	0	0	0	0	0	0	0	0	0	0	0	0	0	0	0	0	0	0	0	0	0	0	0
674	Glabrone	CC1(C)C=Cc2c(ccc(-c3coc4cc(O)ccc4c3=O)c2O)O1	0	0	0	0	0	0	0	0	0	0	0	0	0	0	0	0	0	0	0	0	0	0	0	0	0	0	0	0	0	0	0	0	0	0	0	0	0	0	0	0	0	0	0	0	0	0	0
675	Glyzarin	CC(=O)c1c(O)ccc2c(=O)c(-c3ccccc3)c(C)oc12	0	0	0	0	0	0	0	0	0	0	0	0	0	0	0	0	0	0	0	0	0	0	0	0	0	0	0	0	0	0	0	0	0	0	0	0	0	0	0	0	0	0	0	0	0	0	0
676	Grevilline A	O=C1OC(=Cc2ccc(O)cc2)C(=O)C(c2ccc(O)cc2)=C1O	0	0	0	0	0	0	0	0	0	0	0	0	0	0	0	0	0	0	0	0	0	0	0	0	0	0	0	0	0	0	0	0	0	0	0	0	0	0	0	0	0	0	0	0	0	0	0
678	(S)-Naringenin	O=C1CC(c2ccc(O)cc2)Oc2cc(O)cc(O)c21	0	0	0	0	0	0	0	0	0	0	0	0	0	0	0	0	0	0	0	0	0	0	0	0	0	0	0	0	0	0	0	0	0	0	0	0	0	0	0	0	0	0	0	0	0	0	0
679	Safflor Yellow A	O=C(C=Cc1ccc(O)cc1)C1=C(O)C(O)(C2OC(CO)C(O)C(O)C2O)C2=C(C1=O)C1OC(CO)C(O)C(O)C1O2	0	0	0	0	0	0	0	0	0	0	0	0	0	0	0	0	0	0	0	0	0	0	0	0	0	0	0	0	0	0	0	0	0	0	0	0	0	0	0	0	0	0	0	0	0	0	0
680	Delphinidin 3-[6''-(4'''-p-coumaroylrhamnosyl)glucoside] 5-glucoside	CC1OC(OCC2OC(Oc3cc4c(OC5OC(CO)C(O)C(O)C5O)cc(O)cc4[o+]c3-c3cc(O)c(O)c(O)c3)C(O)C(O)C2O)C(O)C(OC(=O)C=Cc2ccc(O)cc2)C1O	0	0	0	0	0	0	0	0	0	0	0	0	0	0	0	0	0	0	0	0	0	0	0	0	0	0	0	0	0	0	0	0	0	0	0	0	0	1	0	0	0	0	0	0	0	0	0
681	Neodiospyrin	Cc1cc(O)c2c(c1)C(=O)C=C(c1c(C)cc(O)c3c1C(=O)C=CC3=O)C2=O	0	0	0	0	0	0	0	0	0	0	0	0	0	0	0	0	0	0	0	0	0	0	0	0	0	0	0	0	0	0	0	0	0	0	0	0	0	0	0	0	0	0	0	0	0	0	0
682	Xenognosin A	COc1cc(O)ccc1CC=Cc1ccc(O)cc1	0	0	0	0	0	0	0	0	0	0	0	0	0	0	0	0	0	0	0	0	0	0	0	0	0	0	0	0	0	0	0	0	0	0	0	0	0	0	0	0	0	0	0	0	0	0	0
683	Nobiletin	COc1ccc(-c2cc(=O)c3c(OC)c(OC)c(OC)c(OC)c3o2)cc1OC	0	0	0	0	0	0	0	0	0	0	0	0	0	0	0	0	0	0	0	0	0	0	0	0	0	0	0	0	0	0	0	0	0	0	0	0	0	0	0	0	0	0	0	0	0	0	0
684	(+)-Zeylenol	O=C(OCC1(O)C(O)C=CC(OC(=O)c2ccccc2)C1O)c1ccccc1	0	0	0	0	0	0	0	0	0	0	0	0	0	0	0	0	0	0	0	0	0	0	0	0	0	0	0	0	0	0	0	0	0	0	0	0	0	0	0	0	0	0	0	0	0	0	0
685	Clusin	COc1cc(CC2C(Cc3ccc4c(c3)OCO4)COC2O)cc(OC)c1OC	0	0	0	0	0	0	0	0	0	0	0	0	0	0	0	0	0	0	0	0	0	0	0	0	0	0	0	0	0	0	0	0	0	0	0	0	0	0	0	0	0	0	0	0	0	0	0
686	(+)-Ligballinol	Oc1ccc(C2OCC3C(c4ccc(O)cc4)OCC23)cc1	0	0	0	0	0	0	0	0	0	0	0	0	0	0	0	0	0	0	0	0	0	0	0	0	0	0	0	0	0	0	0	0	0	0	0	0	0	0	0	0	0	0	0	0	0	0	0
687	(-)-Ligballinol	Oc1ccc(C2OCC3C(c4ccc(O)cc4)OCC23)cc1	0	0	0	0	0	0	0	0	0	0	0	0	0	0	0	0	0	0	0	0	0	0	0	0	0	0	0	0	0	0	0	0	0	0	0	0	0	0	0	0	0	0	0	0	0	0	0
688	Eriodictyol	O=C1CC(c2ccc(O)c(O)c2)Oc2cc(O)cc(O)c21	0	0	0	0	0	0	0	0	0	0	0	0	0	0	0	0	0	0	0	0	0	0	0	0	0	0	0	0	0	0	0	0	0	0	0	0	0	0	0	0	0	0	0	0	0	0	0
689	Eriodictyol 7-glucoside	O=C1CC(c2ccc(O)c(O)c2)Oc2cc(OC3OC(CO)C(O)C(O)C3O)cc(O)c21	0	0	0	0	0	0	0	0	0	0	0	0	0	0	0	0	0	0	0	0	0	0	0	0	0	0	0	0	0	0	0	0	0	0	0	0	0	0	0	0	0	0	0	0	0	0	0
690	3'-Hydroxy-4',5,6,7,8-pentamethoxyflavone	COc1ccc(-c2cc(=O)c3c(OC)c(OC)c(OC)c(OC)c3o2)cc1O	0	0	0	0	0	0	0	0	0	0	0	0	0	0	0	0	0	0	0	0	0	0	0	0	0	0	0	0	0	0	0	0	0	0	0	0	0	0	0	0	0	0	0	0	0	0	0
691	Pebrellin	COc1ccc(-c2cc(=O)c3c(O)c(O)c(OC)c(OC)c3o2)cc1OC	0	0	0	0	0	0	0	0	0	0	0	0	0	0	0	0	0	0	0	0	0	0	0	0	0	0	0	0	0	0	0	0	0	0	0	0	0	0	0	0	0	0	0	0	0	0	0
692	4'-Hydroxy-3',5,6,7,8-pentamethoxyflavone	COc1cc(-c2cc(=O)c3c(OC)c(OC)c(OC)c(OC)c3o2)ccc1O	0	0	0	0	0	0	0	0	0	0	0	0	0	0	0	0	0	0	0	0	0	0	0	0	0	0	0	0	0	0	0	0	0	0	0	0	0	0	0	0	0	0	0	0	0	0	0
693	Diosmetin 7-rutinoside	COc1ccc(-c2cc(=O)c3c(O)cc(OC4OC(COC5OC(C)C(O)C(O)C5O)C(O)C(O)C4O)cc3o2)cc1O	0	0	0	0	0	0	0	0	0	0	0	0	0	0	0	0	0	0	0	0	0	0	0	0	0	0	0	0	0	0	0	0	0	0	0	0	0	0	0	0	0	0	0	0	0	0	0
694	Eleutheroside B1	COc1cc2ccc(=O)oc2c(OC)c1OC1OC(CO)C(O)C(O)C1O	0	0	0	0	0	0	0	0	0	0	0	0	0	0	0	0	0	0	0	0	0	0	0	0	0	0	0	0	0	0	0	0	0	0	0	0	0	0	0	0	0	0	0	0	0	0	0
695	Calycanthoside	COc1cc2ccc(=O)oc2c(OC)c1OC1OC(CO)C(O)C(O)C1O	0	0	0	0	0	0	0	0	0	0	0	0	0	0	0	0	0	0	0	0	0	0	0	0	0	0	0	0	0	0	0	0	0	0	0	0	0	0	0	0	0	0	0	0	0	0	0
696	Isofraxidin	COc1cc2ccc(=O)oc2c(OC)c1O	0	0	0	0	0	0	0	0	0	0	0	0	0	0	0	0	0	0	0	0	0	0	0	0	0	0	0	0	0	0	0	0	0	0	0	0	0	0	0	0	0	0	0	0	0	0	0
697	Amitenone	CC(C)=CCCC(C)=CCCC(C)=CCCC(C)=CCC1=C(O)C(=O)C(CC2=C(O)C(=O)C(CC=C(C)CCC=C(C)CCC=C(C)CCC=C(C)C)=C(O)C2=O)=C(O)C1=O	0	0	0	0	0	0	0	0	0	0	0	0	0	0	0	0	0	0	0	0	0	0	0	0	0	0	0	0	0	0	0	0	0	0	0	0	0	0	0	0	0	0	0	0	0	0	0
698	Glycitein	COc1cc2c(=O)c(-c3ccc(O)cc3)coc2cc1O	0	0	0	0	0	0	0	0	0	0	0	0	0	0	0	0	0	0	0	0	0	0	0	0	0	0	0	0	0	0	0	0	0	0	0	0	0	0	0	0	0	0	0	0	0	0	0
699	1-Undecene	C=CCCCCCCCCC	0	0	0	0	0	0	0	0	0	0	0	0	0	0	0	0	0	0	0	0	0	0	0	0	0	0	0	0	0	0	0	1	0	0	0	0	0	0	0	0	0	0	0	0	0	0	0
700	Undecanoic acid	CCCCCCCCCCC(=O)O	0	0	0	0	0	0	0	0	0	0	0	0	0	0	0	0	0	0	0	0	0	0	0	0	0	0	0	0	0	0	0	1	0	0	0	0	0	0	0	0	0	0	0	0	0	0	0
701	Ethyl undecanoate	CCCCCCCCCCC(=O)OCC	0	0	0	0	0	0	0	0	0	0	0	0	0	0	0	0	0	0	0	0	0	0	0	0	0	0	0	0	0	0	0	1	0	0	0	0	0	0	0	0	0	0	0	0	0	0	0
702	Carrotatoxin	C=CC(O)C#CC#CCC=CCCCCCCC	0	0	0	0	0	0	0	0	0	0	0	0	0	0	0	0	0	0	0	0	0	0	0	0	0	0	0	0	0	0	0	1	0	0	0	0	0	0	0	0	0	0	0	0	0	0	0
703	(E)-2-(2,4-Hexadiynylidene)-1,6-dioxaspiro[4.5]dec-3-ene	CC#CC#CC=C1C=CC2(CCCCO2)O1	0	0	0	0	0	0	0	0	0	0	0	0	0	0	0	0	0	0	0	0	0	0	0	0	0	0	0	0	0	0	0	0	0	0	0	0	0	0	0	0	0	0	0	0	0	0	0
704	Glycerol trieicosanoate	CCCCCCCCCCCCCCCCCCCC(=O)OCC(COC(=O)CCCCCCCCCCCCCCCCCCC)OC(=O)CCCCCCCCCCCCCCCCCCC	0	0	0	0	0	0	0	0	0	0	0	0	0	0	0	0	0	0	0	0	0	0	0	0	0	0	0	0	0	0	0	1	0	0	0	0	0	0	0	0	0	0	0	0	0	0	0
705	Glycerol 1,2-di-(9Z,12Z-octadecadienoate) 3-octadecanoate	CCCCCC=CCC=CCCCCCCCC(=O)OCC(COC(=O)CCCCCCCCCCCCCCCCC)OC(=O)CCCCCCCC=CCC=CCCCCC	0	0	0	0	0	0	0	0	0	0	0	0	0	0	0	0	0	0	0	0	0	0	0	0	0	0	0	0	0	0	0	1	0	0	0	0	0	0	0	0	0	0	0	0	0	0	0
706	4,5-Dihydro-2-methylthiazole	CC1=NCCS1	0	0	0	0	0	0	0	0	0	0	0	0	0	0	0	0	0	0	0	0	0	0	0	0	0	0	0	0	0	0	0	0	0	0	0	0	0	0	0	0	0	0	0	0	0	0	0
707	Glycerol tribenzoate	O=C(OCC(COC(=O)c1ccccc1)OC(=O)c1ccccc1)c1ccccc1	0	0	0	0	0	0	0	0	0	0	0	0	0	0	0	0	0	0	0	0	0	0	0	0	0	0	0	0	0	0	0	0	0	0	0	0	0	0	0	0	0	0	0	0	0	0	0
708	Dihydroisophorol	CC1CC(O)CC(C)(C)C1	0	0	0	0	0	0	0	0	0	0	0	0	0	0	0	0	0	0	0	0	0	0	0	0	0	0	0	0	0	0	0	0	0	0	0	0	0	0	0	0	0	0	0	0	0	0	0
709	(R)-Synephrine	CNCOC(O)c1ccc(O)cc1	0	0	0	0	0	0	0	0	0	0	0	0	0	0	0	0	0	0	0	0	0	0	0	0	0	0	0	0	0	0	0	0	0	0	0	0	0	0	0	0	0	0	0	0	0	0	0
710	Choline	C[N+](C)(C)CCO	0	0	0	0	0	0	0	0	0	0	0	0	0	0	0	0	0	0	0	0	0	0	0	0	0	0	0	0	0	0	0	0	0	0	0	0	0	0	0	0	0	0	0	0	0	0	0
711	Choline chloride	C[N+](C)(C)CCO.[Cl-]	0	0	0	0	0	0	0	0	0	0	0	0	0	0	0	0	0	0	0	0	0	0	0	0	0	0	0	0	0	0	0	0	0	0	0	0	0	0	0	0	0	0	0	0	0	0	0
712	(4-Hydroxybenzoyl)choline	C[N+](C)(C)CCOC(O)=C1C=CC(=O)C=C1	0	0	0	0	0	0	0	0	0	0	0	0	0	0	0	0	0	0	0	0	0	0	0	0	0	0	0	0	0	0	0	0	0	0	0	0	0	0	0	0	0	0	0	0	0	0	0
713	Hesperaline	COc1ccc(C(=O)OCC[N+](C)(C)C)cc1OC	0	0	0	0	0	0	0	0	0	0	0	0	0	0	0	0	0	0	0	0	0	0	0	0	0	0	0	0	0	0	0	0	0	0	0	0	0	0	0	0	0	0	0	0	0	0	0
714	Pimpinellidine	COc1c(OC)c2occc2c2oc(=O)ccc12	0	0	0	0	0	0	0	0	0	0	0	0	0	0	0	0	0	0	0	0	0	0	0	0	0	0	0	0	0	0	0	0	0	0	0	0	0	0	0	0	0	0	0	0	0	0	0
715	(+)-Calycanthine	CN1CCC23c4ccccc4NC1C21CCN(C)C3Nc2ccccc21	0	0	0	0	0	0	0	0	0	0	0	0	0	0	0	0	0	0	0	0	0	0	0	0	0	0	0	0	0	0	0	0	0	0	0	0	0	0	0	0	0	0	0	0	0	0	0
716	N-gamma-L-Glutamyl-L-phenylalanine	NC(CCC(O)=NC(Cc1ccccc1)C(=O)O)C(=O)O	0	0	0	0	0	0	0	0	0	0	0	0	0	0	0	0	0	0	0	0	0	0	0	0	0	0	0	0	0	0	0	0	0	0	0	0	0	0	0	0	0	0	0	0	0	0	0
717	N-gamma-L-Glutamyl-L-tyrosine	NC(CCC(=O)NC(Cc1ccc(O)cc1)C(=O)O)C(=O)O	0	0	0	0	0	0	0	0	0	0	0	0	0	0	0	0	0	0	0	0	0	0	0	0	0	0	0	0	0	0	0	0	0	0	0	0	0	0	0	0	0	0	0	0	0	0	0
718	3-Acetyl-2,5-dimethylfuran	CC(=O)c1cc(C)oc1C	0	0	0	0	0	0	0	0	0	0	0	0	0	0	0	0	0	0	0	0	0	0	0	0	0	0	0	0	0	0	0	0	0	0	0	0	0	0	0	0	0	0	0	0	0	0	0
719	Bufotenine O-glucoside	CN(C)CCc1c[nH]c2ccc(OC3OC(CO)C(O)C(O)C3O)cc12	0	0	0	0	0	0	0	0	0	0	0	0	0	0	0	0	0	0	0	0	0	0	0	0	0	0	0	0	0	0	0	0	0	0	0	0	0	0	0	0	0	0	0	0	0	0	0
720	Demethoxyfumitremorgin C	CC(C)=CC1c2[nH]c3ccccc3c2CC2C(=O)N3CCCC3C(=O)N21	0	0	0	0	0	0	0	0	0	0	0	0	0	0	0	0	0	0	0	0	0	0	0	0	0	0	0	0	0	0	0	0	0	0	0	0	0	0	0	0	0	0	0	0	0	0	0
721	Isopulegone caffeate	C=C(C)C1CCC(COC(=O)C=Cc2ccc(O)c(O)c2)CC1	0	0	0	0	0	0	0	0	0	0	0	0	0	0	0	0	0	0	0	0	0	0	0	0	0	0	0	0	0	0	0	0	0	0	0	0	0	0	0	0	0	0	0	0	0	0	0
722	Hydroxy-alpha-sanshool	CC=CC=CC=CCCC=CC(O)=NCC(C)(C)O	0	0	0	0	0	0	0	0	0	0	0	0	0	0	0	0	0	0	0	0	0	0	0	0	0	0	0	0	0	0	0	0	0	0	0	0	0	0	0	0	0	0	0	0	0	0	0
723	N5-Hexanoylspermidine	CCCCCC(=O)N(CCCN)CCCCN	0	0	0	0	0	0	0	0	0	0	0	0	0	0	0	0	0	0	0	0	0	0	0	0	0	0	0	0	0	0	0	0	0	0	0	0	0	0	0	0	0	0	0	0	0	0	0
724	Dibutyl disulfide	CCCCSSCCCC	0	0	0	0	0	0	0	0	0	0	0	0	0	0	0	0	0	0	0	0	0	0	0	0	0	0	0	0	0	0	0	0	0	0	1	0	0	0	0	0	0	0	0	0	0	0	0
725	Dichlorodifluoromethane	FC(F)(Cl)Cl	0	0	0	0	0	0	0	0	0	0	0	0	0	0	0	0	0	0	0	0	0	0	0	0	0	0	0	0	0	0	0	0	0	0	0	0	0	0	0	0	0	0	0	0	0	0	0
726	1,2-Dichloroethane	ClCCCl	1	0	0	0	0	0	0	0	0	0	0	0	0	0	0	0	0	0	0	0	0	0	0	0	0	0	0	0	0	0	0	0	0	0	0	0	0	0	0	0	0	0	0	0	0	0	0
727	Diethyl disulfide	CCSSCC	0	0	0	0	0	0	0	0	0	0	0	0	0	0	0	0	0	0	0	0	0	0	0	0	0	0	0	0	0	0	0	0	0	0	1	0	0	0	0	0	0	0	0	0	0	0	0
728	Diethyl malonate	CCOC(=O)CC(=O)OCC	0	0	0	0	0	0	0	0	0	0	0	0	0	0	0	0	0	0	0	0	0	0	0	0	0	0	0	0	0	0	0	0	0	0	0	0	0	0	0	0	0	0	0	0	0	0	0
729	2,5-Diethyltetrahydrofuran	CCC1CCC(CC)O1	0	0	0	0	0	0	0	0	0	0	0	0	0	0	0	0	0	0	0	0	0	0	0	0	0	0	0	0	0	0	0	0	0	0	0	0	0	0	0	0	0	0	0	0	0	0	0
730	(-)-trans-2,5-Diethyltetrahydrofuran	CCC1CCC(CC)O1	0	0	0	0	0	0	0	0	0	0	0	0	0	0	0	0	0	0	0	0	0	0	0	0	0	0	0	0	0	0	0	0	0	0	0	0	0	0	0	0	0	0	0	0	0	0	0
731	(+)-cis-5,6-Dihydro-5-hydroxy-4-methoxy-6-(2-phenylethyl)-2H-pyran-2-one	COC1=CC(=O)OC(CCc2ccccc2)C1O	0	0	0	0	0	0	0	0	0	0	0	0	0	0	0	0	0	0	0	0	0	0	0	0	0	0	0	0	0	0	0	0	0	0	0	0	0	0	0	0	0	0	0	0	0	0	0
732	2,3-Dihydroxy-2-methylbutanoic acid	CC(O)C(C)(O)C(=O)O	0	0	0	0	0	0	0	0	0	0	0	0	0	0	0	0	0	0	0	0	0	0	0	0	0	0	0	0	0	0	0	0	0	0	0	0	0	0	0	0	0	0	0	0	0	0	0
733	6-Hydroxydaidzein 4'-glucoside	O=c1c(-c2ccc(OC3OC(CO)C(O)C(O)C3O)cc2)coc2cc(O)c(O)cc12	0	0	0	0	0	0	0	0	0	0	0	0	0	0	0	0	0	0	0	0	0	0	0	0	0	0	0	0	0	0	0	0	0	0	0	0	0	0	0	0	0	0	0	0	0	0	0
734	Diisopropyl disulfide	CC(C)SSC(C)C	0	0	0	0	0	0	0	0	0	0	0	0	0	0	0	0	0	0	0	0	0	0	0	0	0	0	0	0	0	0	0	0	0	0	1	0	0	0	0	0	0	0	0	0	0	0	0
735	Diisopropyl sulfide	CC(C)SC(C)C	0	0	0	0	0	0	0	0	0	0	0	0	0	0	0	0	0	0	0	0	0	0	0	0	0	0	0	0	0	0	0	0	0	0	0	0	0	0	0	0	0	0	0	0	0	0	0
736	3-Methyl-2-butenoic acid	CC(C)=CC(=O)O	0	0	0	0	0	0	0	0	0	0	0	0	0	0	0	0	0	0	0	0	0	0	0	0	0	0	0	0	0	0	0	0	0	0	0	0	0	0	0	0	0	0	0	0	0	0	0
737	Dimethyl carbonate	COC(=O)OC	0	0	0	0	0	0	0	0	0	0	0	0	0	0	0	0	0	0	0	0	0	0	0	0	0	0	0	0	0	0	0	0	0	0	0	0	0	0	0	0	0	0	0	0	0	0	0
738	(2E,4E)-2,4-Hexadienoic acid	CC=CC=CC(=O)O	0	0	0	0	0	0	0	0	0	0	0	0	0	0	0	0	0	0	0	0	0	0	0	0	0	0	0	0	0	0	0	0	0	0	0	0	0	0	0	0	0	0	0	0	0	0	0
739	Methyl sorbate	CC=CC=CC(=O)OC	0	0	0	0	0	0	0	0	0	0	0	0	0	0	0	0	0	0	0	0	0	0	0	0	0	0	0	0	0	0	0	0	0	0	0	0	0	0	0	0	0	0	0	0	0	0	0
740	Lycopersiconol	CC(=O)C1C(O)CC2C3CCC4CC(O)CCC4(C)C3CCC21C	0	0	0	0	0	0	0	0	0	0	0	0	0	0	0	0	0	0	0	0	0	0	0	0	0	0	0	0	0	0	0	0	0	0	0	0	0	0	0	0	0	0	0	0	0	0	0
741	2-Pyrrolidinone	O=C1CCCN1.OC1=CCCN1	0	0	0	0	0	0	0	0	0	0	0	0	0	0	0	0	0	0	0	0	0	0	0	0	0	0	0	0	0	0	0	0	0	0	0	0	0	0	0	0	0	0	0	0	0	0	0
742	Gossypol	Cc1cc2c(C(C)C)c(O)c(O)c(C=O)c2c(O)c1-c1c(C)cc2c(C(C)C)c(O)c(O)c(C=O)c2c1O	0	0	0	0	0	0	0	0	0	0	0	0	0	0	0	0	0	0	0	0	0	0	0	0	0	0	0	0	0	0	0	0	0	0	0	0	0	0	0	0	0	0	0	0	0	0	0
743	3-O-Methylcoumestrol	COc1ccc2c(c1)oc(=O)c1c3ccc(O)cc3oc21	0	0	0	0	0	0	0	0	0	0	0	0	0	0	0	0	0	0	0	0	0	0	0	0	0	0	0	0	0	0	0	0	0	0	0	0	0	0	0	0	0	0	0	0	0	0	0
744	Methyl 10-undecenoate	C=CCCCCCCCCC(=O)OC	0	0	0	0	0	0	0	0	0	0	0	0	0	0	0	0	0	0	0	0	0	0	0	0	0	0	0	0	0	0	0	1	0	0	0	0	0	0	0	0	0	0	0	0	0	0	0
745	Octadecylamine	CCCCCCCCCCCCCCCCCCN	0	0	0	0	0	0	0	0	0	0	0	0	0	0	0	0	0	0	0	0	0	0	0	0	0	0	0	0	0	0	0	1	0	0	0	0	0	0	0	0	0	0	0	0	0	0	0
746	Lansiol	C=C(C)C(C)(C)C(C)CC(C)C1CCC2(C)C3CCC4C(C)(CCC(O)C4(C)C)C3=CCC12C	0	0	0	0	0	0	0	0	0	0	0	0	0	0	0	0	0	0	0	0	0	0	0	0	0	0	0	0	0	0	0	0	0	0	0	0	0	0	0	0	0	0	0	0	0	0	0
747	Sodium calcium edetate	O=C([O-])CN(CCN(CC(=O)[O-])CC(=O)[O-])CC(=O)[O-].[Ca+2].[Na+].[Na+]	0	0	0	0	0	0	0	0	0	0	0	0	0	0	0	0	0	0	0	0	0	0	0	0	0	0	0	0	0	0	0	0	0	0	0	0	0	0	0	0	0	0	0	0	0	0	0
748	Edetate disodium	O.O.O=C([O-])CN(CCN(CC(=O)[O-])CC(=O)O)CC(=O)O.[Na+].[Na+]	0	0	0	0	0	0	0	0	0	0	0	0	0	0	0	0	0	0	0	0	0	0	0	0	0	0	0	0	0	0	0	0	0	0	0	0	0	0	0	0	0	0	0	0	0	0	0
749	Edetate trisodium	O=C([O-])CN(CCN(CC(=O)[O-])CC(=O)O)CC(=O)[O-].[Na+].[Na+].[Na+]	0	0	0	0	0	0	0	0	0	0	0	0	0	0	0	0	0	0	0	0	0	0	0	0	0	0	0	0	0	0	0	0	0	0	0	0	0	0	0	0	0	0	0	0	0	0	0
750	Edetate sodium	O=C([O-])CN(CCN(CC(=O)[O-])CC(=O)[O-])CC(=O)[O-].[Na+].[Na+].[Na+].[Na+]	0	0	0	0	0	0	0	0	0	0	0	0	0	0	0	0	0	0	0	0	0	0	0	0	0	0	0	0	0	0	0	0	0	0	0	0	0	0	0	0	0	0	0	0	0	0	0
751	Triacetin	CC(=O)OCC(COC(C)=O)OC(C)=O	0	0	0	0	0	0	0	0	0	0	0	0	0	0	0	0	0	0	0	0	0	0	0	0	0	0	0	0	0	0	0	0	0	0	0	0	0	0	0	0	0	0	0	0	0	0	0
752	Trichloroethylene	ClC=C(Cl)Cl	0	0	0	0	0	0	0	0	0	0	0	0	0	0	0	0	0	0	0	0	0	0	0	0	0	0	0	0	0	0	0	0	0	0	0	0	0	0	0	0	0	0	0	0	0	0	0
753	Ethanol	CCO	0	0	0	0	0	0	0	0	0	0	0	0	0	0	0	0	0	0	0	0	0	0	0	0	0	0	0	0	0	0	0	0	0	0	0	0	0	0	0	0	0	0	0	0	0	0	0
754	Ethylene	C=C	0	0	0	0	0	0	0	0	0	0	0	0	0	0	0	0	0	0	0	0	0	0	0	0	0	0	0	0	0	0	0	0	0	0	0	0	0	0	0	0	0	0	0	0	0	0	0
755	2-Methylpropane	CC(C)C	0	0	0	0	0	0	0	0	0	0	0	0	0	0	0	0	0	0	0	0	0	0	0	0	0	0	0	0	0	0	0	0	0	0	0	0	0	0	0	0	0	0	0	0	0	0	0
756	Glycerol	OCC(O)CO	0	0	0	0	0	0	0	0	0	0	0	0	0	0	0	0	0	0	0	0	0	0	0	0	0	0	0	0	0	0	0	0	0	0	0	0	0	0	0	0	0	0	0	0	0	0	0
757	Nonane	CCCCCCCCC	0	0	0	0	0	0	0	0	0	0	0	0	0	0	0	0	0	0	0	0	0	0	0	0	0	0	0	0	0	0	0	1	0	0	0	0	0	0	0	0	0	0	0	0	0	0	0
758	Octane	CCCCCCCC	0	0	0	0	0	0	0	0	0	0	0	0	0	0	0	0	0	0	0	0	0	0	0	0	0	0	0	0	0	0	0	0	0	0	0	0	0	0	0	0	0	0	0	0	0	0	0
759	Butane	CCCC	0	0	0	0	0	0	0	0	0	0	0	0	0	0	0	0	0	0	0	0	0	0	0	0	0	0	0	0	0	0	0	0	0	0	0	0	0	0	0	0	0	0	0	0	0	0	0
760	Chloroform	ClC(Cl)Cl	1	0	0	0	0	0	0	0	0	0	0	0	0	0	0	0	0	0	0	0	0	0	0	0	0	0	0	0	0	0	0	0	0	0	0	0	0	0	0	0	0	0	0	0	0	0	0
761	Cyclohexane	C1CCCCC1	0	0	0	0	0	0	0	0	0	0	0	0	0	0	0	0	0	0	0	0	0	0	0	0	0	0	0	0	0	0	0	0	0	0	0	0	0	0	0	0	0	0	0	0	0	0	0
762	Metenamine	C1N2CN3CN1CN(C2)C3	0	0	0	0	0	0	0	0	0	0	0	0	0	0	0	0	0	0	0	0	0	0	0	0	0	0	0	0	0	0	0	0	0	0	0	0	0	0	0	0	0	0	0	0	0	0	0
763	Glutaral	O=CCCCC=O	0	0	0	0	0	0	0	0	0	0	0	0	0	0	0	0	0	0	0	0	0	0	0	0	0	0	0	0	0	0	0	0	0	0	0	0	0	0	0	0	0	0	0	0	0	0	0
764	Dimethyl sulfoxide	CS(C)=O	0	0	0	0	0	0	0	0	0	0	0	0	0	0	0	0	0	0	0	0	0	0	0	0	0	0	0	0	0	0	0	0	0	0	0	0	0	0	0	0	0	0	0	0	0	0	0
765	Hexane	CCCCCC	0	0	0	0	0	0	0	0	0	0	0	0	0	0	0	0	0	0	0	0	0	0	0	0	0	0	0	0	0	0	0	0	0	0	0	0	0	0	0	0	0	0	0	0	0	0	0
766	Furocoumarinic acid glucoside	O=C(O)C=Cc1cc2ccoc2cc1OC1OC(CO)C(O)C(O)C1O	0	0	0	0	0	0	0	0	0	0	0	0	0	0	0	0	0	0	0	0	0	0	0	0	0	0	0	0	0	0	0	0	0	0	0	0	0	0	0	0	0	0	0	0	0	0	0
767	4-Phenyl-2-butenal	O=CC=CCc1ccccc1	0	0	0	0	0	0	0	0	0	0	0	0	0	0	0	0	0	0	0	0	0	0	0	0	0	0	0	0	0	0	0	0	0	0	0	0	0	0	0	0	0	0	0	0	0	0	0
768	Pentane	CCCCC	0	0	0	0	0	0	0	0	0	0	0	0	0	0	0	0	0	0	0	0	0	0	0	0	0	0	0	0	0	0	0	0	0	0	0	0	0	0	0	0	0	0	0	0	0	0	0
769	2-Aminoethanol	NCCO	0	0	0	0	0	0	0	0	0	0	0	0	0	0	0	0	0	0	0	0	0	0	0	0	0	0	0	0	0	0	0	0	0	0	0	0	0	0	0	0	0	0	0	0	0	0	0
770	Lubiminol	C=C(C)C1CCC2(C1)C(CO)CC(O)C(O)C2C	0	0	0	0	0	0	0	0	0	0	0	0	0	0	0	0	0	0	0	0	0	0	0	0	0	0	0	0	0	0	0	0	0	0	0	0	0	0	0	0	0	0	0	0	0	0	0
771	Ginkgolide J	CC1C(=O)OC2CC34C5OC(=O)C3(OC3OC(=O)C(O)C34C(C(C)(C)C)C5O)C21O	0	0	0	0	0	0	0	0	0	0	0	0	0	0	0	0	0	0	0	0	0	0	0	0	0	0	0	0	0	0	0	0	0	0	0	0	0	0	0	0	0	0	0	0	0	0	0
772	Lucyoside O	CC1(C)CCC2(C(=O)O)CCC3(C)C(=CCC4C5(C)CC(O)C(OC6OC(CO)C(O)C(O)C6O)C(C)(C)C5CCC43C)C2C1	0	0	0	0	0	0	0	0	0	0	0	0	0	0	0	0	0	0	0	0	0	0	0	0	0	0	0	0	0	0	0	0	0	0	0	0	0	0	0	0	0	0	0	0	0	0	0
773	Stigmastentriol	CCC(CC(O)C(C)C1CCC2C3C(O)C=C4CC(O)CCC4(C)C3CCC12C)C(C)C	0	0	0	0	0	0	0	0	0	0	0	0	0	0	0	0	0	0	0	0	0	0	0	0	0	0	0	0	0	0	0	0	0	0	0	0	0	0	0	0	0	0	0	0	0	0	0
774	Tiglic acid	CC=C(C)C(=O)O	0	0	0	0	0	0	0	0	0	0	0	0	0	0	0	0	0	0	0	0	0	0	0	0	0	0	0	0	0	0	0	0	0	0	0	0	0	0	0	0	0	0	0	0	0	0	0
775	Angelic acid	CC=C(C)C(=O)O	0	0	0	0	0	0	0	0	0	0	0	0	0	0	0	0	0	0	0	0	0	0	0	0	0	0	0	0	0	0	0	0	0	0	0	0	0	0	0	0	0	0	0	0	0	0	0
776	5-Methyl-2(3H)-furanone	CC1C=CC(=O)O1	0	0	0	0	0	0	0	0	0	0	0	0	0	0	0	0	0	0	0	0	0	0	0	0	0	0	0	0	0	0	0	0	0	0	0	0	0	0	0	0	0	0	0	0	0	0	0
777	Ascladiol	O=C1OC(=CCO)C=C1CO	0	0	0	0	0	0	0	0	0	0	0	0	0	0	0	0	0	0	0	0	0	0	0	0	0	0	0	0	0	0	0	0	0	0	0	0	0	0	0	0	0	0	0	0	0	0	0
778	Asparagusic acid	O=C(O)C1CSSC1	0	0	0	0	0	0	0	0	0	0	0	0	0	0	0	0	0	0	0	0	0	0	0	0	0	0	0	0	0	0	0	0	0	0	1	0	0	0	0	0	0	0	0	0	0	0	0
779	Asparagusic acid syn-S-oxide	O=C(O)C1CSS(=O)C1	0	0	0	0	0	0	0	0	0	0	0	0	0	0	0	0	0	0	0	0	0	0	0	0	0	0	0	0	0	0	0	0	0	0	1	0	0	0	0	0	0	0	0	0	0	0	0
780	Asparagusic acid anti-S-oxide	O=C(O)C1CSS(=O)C1	0	0	0	0	0	0	0	0	0	0	0	0	0	0	0	0	0	0	0	0	0	0	0	0	0	0	0	0	0	0	0	0	0	0	1	0	0	0	0	0	0	0	0	0	0	0	0
781	9-Azabicyclo[3.3.1]nonan-3-one	O=C1CC2CCCC(C1)N2	0	0	0	0	0	0	0	0	0	0	0	0	0	0	0	0	0	0	0	0	0	0	0	0	0	0	0	0	0	0	0	0	0	0	0	0	0	0	0	0	0	0	0	0	0	0	0
782	(Ã¥Â±)-Conen	CCCCOP(=O)(SCC)SCc1ccccc1	0	0	0	0	0	0	0	0	0	0	0	0	0	0	0	0	0	0	0	0	0	0	0	0	0	0	0	0	0	0	0	0	0	0	0	0	0	0	0	0	0	0	0	0	0	0	0
783	(S)-2-Azetidinecarboxylic acid	O=C(O)C1CCN1	0	0	0	0	0	0	0	0	0	0	0	0	0	0	0	0	0	0	0	0	0	0	0	0	0	0	0	0	0	0	0	0	0	0	0	0	0	0	0	0	0	0	0	0	0	0	0
784	Diazenedicarboxamide	NC(=O)N=NC(N)=O	0	0	0	0	0	0	0	0	0	0	0	0	0	0	0	0	0	0	0	0	0	0	0	0	0	0	0	0	0	0	0	0	0	0	0	0	0	0	0	0	0	0	0	0	0	0	0
785	Glucoobtusifolin	COc1c(OC2OC(CO)C(O)C(O)C2O)c(C)cc2c1C(=O)c1c(O)cccc1C2=O	0	0	0	0	0	0	0	0	0	0	0	0	0	0	0	0	0	0	0	0	0	0	0	0	0	0	0	0	0	0	0	0	0	0	0	0	0	0	0	0	0	0	0	0	0	0	0
786	Isobetanin	O=C(O)C1=CC(=CC=[N+]2c3cc(O)c(OC4OC(CO)C(O)C(O)C4O)cc3CC2C(=O)[O-])CC(C(=O)O)N1	0	0	0	0	0	0	0	0	0	0	0	0	0	0	0	1	0	0	0	0	0	0	0	0	0	0	0	0	0	0	0	0	0	0	0	0	0	0	0	0	0	0	0	0	0	0	0
787	L-Asparagine	NC(=O)CC(N)C(=O)O	0	0	0	0	0	0	0	0	0	0	0	0	0	0	0	0	0	0	0	0	0	0	0	0	0	0	0	0	0	0	0	0	0	0	0	0	0	0	0	0	0	0	0	0	0	0	0
788	Macrophorin D	C=C1CCC2C(C)(C)CCCC2(C)C1CC12OC1C(O)C(COC(=O)CC(C)(O)CC(=O)O)=CC2=O	0	0	0	0	0	0	0	0	0	0	0	0	0	0	0	0	0	0	0	0	0	0	0	0	0	0	0	0	0	0	0	0	0	0	0	0	1	0	0	0	0	0	0	0	0	0	0
789	Arabinopyranobiose	OC1COC(OC2C(O)COC(O)C2O)C(O)C1O	0	0	0	0	0	0	0	0	0	0	0	0	0	0	0	0	0	0	0	0	0	0	0	0	0	0	0	0	0	0	0	0	0	0	0	0	0	0	0	0	0	0	0	0	0	0	0
790	Tricetin	O=c1cc(-c2cc(O)c(O)c(O)c2)oc2cc(O)cc(O)c12	0	0	0	0	0	0	0	0	0	0	0	0	0	0	0	0	0	0	0	0	0	0	0	0	0	0	0	0	0	0	0	0	0	0	0	0	0	1	0	0	0	0	0	0	0	0	0
791	Lucyoside Q	CC1(C)CC2C3=CCC4C5(C)CCC(O)C(C)(C)C5CCC4(C)C3(C)CCC2(C(=O)OC2OC(CO)C(O)C(O)C2O)CC1O	0	0	0	0	0	0	0	0	0	0	0	0	0	0	0	0	0	0	0	0	0	0	0	0	0	0	0	0	0	0	0	0	0	0	0	0	0	0	0	0	0	0	0	0	0	0	0
792	Isopetasoside	CC(C)=C1CC2(C)C(=CC1=O)CCC(OC1OC(CO)C(O)C(O)C1O)C2C	0	0	0	0	0	0	0	0	0	0	0	0	0	0	0	0	0	0	0	0	0	0	0	0	0	0	0	0	0	0	0	0	0	0	0	0	0	0	0	0	0	0	0	0	0	0	0
793	Torvoside C	CC1COC2(OC3CC4C5CC(OC6OC(C)C(O)C(OC7OC(C)C(O)C(O)C7O)C6O)C6CC(O)CCC6(C)C5CCC4(C)C3C2C)C(O)C1	0	0	0	0	0	0	0	0	0	0	0	0	0	0	0	0	0	0	0	0	0	0	0	0	0	0	0	0	0	0	0	0	0	0	0	0	0	0	0	0	0	0	0	0	0	0	0
794	Torvoside D	CC1COC2(OC3CC4C5CC(OC6OC(C)C(O)C(OC7OCC(O)C(O)C7O)C6O)C6CC(O)CCC6(C)C5CCC4(C)C3C2C)C(O)C1	0	0	0	0	0	0	0	0	0	0	0	0	0	0	0	0	0	0	0	0	0	0	0	0	0	0	0	0	0	0	0	0	0	0	0	0	0	0	0	0	0	0	0	0	0	0	0
795	3-O-Protocatechuoylceanothic acid	C=C(C)C1CCC2(C(=O)O)CCC3(C)C(CCC4C5(C)C(C(=O)O)C(OC(=O)c6ccc(O)c(O)c6)C(C)(C)C5CCC43C)C12	0	0	0	0	0	0	0	0	0	0	0	0	0	0	0	0	0	0	0	0	0	0	0	0	0	0	0	0	0	0	0	0	0	0	0	0	0	0	0	0	0	0	0	0	0	0	0
796	5alpha-Ethoxy-6beta-hydroxy-5,6-dihydrophysalin B	CCOC12CC=CC(=O)C1(C)C1CCC3(O)C(=O)OC4(C)C5CC6(C)C(COC7(OC34C6C7=O)C1CC2O)C(=O)O5	0	0	0	0	0	0	0	0	0	0	0	0	0	0	0	0	0	0	0	0	0	0	0	0	0	0	0	0	0	0	0	0	0	0	0	0	0	0	0	0	0	0	0	0	0	0	0
797	1,2,3,5-Tetrachloro-4-methoxybenzene	COc1c(Cl)cc(Cl)c(Cl)c1Cl	0	0	0	0	0	0	0	0	0	0	0	0	0	0	0	0	0	0	0	0	0	0	0	0	0	0	0	0	0	0	0	0	0	0	0	0	0	0	0	0	0	0	0	0	0	0	0
798	Chlorthal	O=C(O)c1c(Cl)c(Cl)c(C(=O)O)c(Cl)c1Cl	0	0	0	0	0	0	0	0	0	0	0	0	0	0	0	0	0	0	0	0	0	0	0	0	0	0	0	0	0	0	0	0	0	0	0	0	0	0	0	0	0	0	0	0	0	0	0
799	2'',6''-Digalloyliriflophenone 3-C-glucoside	O=C(OCC1OC(c2c(O)cc(O)c(C(=O)c3ccc(O)cc3)c2O)C(OC(=O)c2cc(O)c(O)c(O)c2)C(O)C1O)c1cc(O)c(O)c(O)c1	0	0	0	0	0	0	0	0	0	0	0	0	0	0	0	0	0	0	0	0	0	0	0	0	0	0	0	0	0	0	0	0	0	0	0	0	0	1	0	0	0	0	0	0	0	0	0
800	2'',3'',6''-Trigalloyliriflophenone 3-C-glucoside	O=C(OCC1OC(c2c(O)cc(O)c(C(=O)c3ccc(O)cc3)c2O)C(OC(=O)c2cc(O)c(O)c(O)c2)C(OC(=O)c2cc(O)c(O)c(O)c2)C1O)c1cc(O)c(O)c(O)c1	0	0	0	0	0	0	0	0	0	0	0	0	0	0	0	0	0	0	0	0	0	0	0	0	0	0	0	0	0	0	0	0	0	0	0	0	0	1	0	0	0	0	0	0	0	0	0
801	Chalconaringenin	O=C(C=Cc1ccc(O)cc1)c1c(O)cc(O)cc1O	0	0	0	0	0	0	0	0	0	0	0	0	0	0	0	0	0	0	0	0	0	0	0	0	0	0	0	0	0	0	0	0	0	0	0	0	0	0	0	0	0	0	0	0	0	0	0
802	Oleyl alcohol	CCCCCCCCC=CCCCCCCCCO	0	0	0	0	0	0	0	0	0	0	0	0	0	0	0	0	0	0	0	0	0	0	0	0	0	0	0	0	0	0	0	1	0	0	0	0	0	0	0	0	0	0	0	0	0	0	0
803	Phenylmethanethiol	SCc1ccccc1	0	0	0	0	0	0	0	0	0	0	0	0	0	0	0	0	0	0	0	0	0	0	0	0	0	0	0	0	0	0	0	0	0	0	0	1	0	0	0	0	0	0	0	0	0	0	0
804	2-Methylbenzenethiol	Cc1ccccc1S	0	0	0	0	0	0	0	0	0	0	0	0	0	0	0	0	0	0	0	0	0	0	0	0	0	0	0	0	0	0	0	0	0	0	0	1	0	0	0	0	0	0	0	0	0	0	0
805	4-Methylbenzoic acid	Cc1ccc(C(=O)O)cc1	0	0	0	0	0	0	0	0	0	0	0	0	0	0	0	0	0	0	0	0	0	0	0	0	0	0	0	0	0	0	0	0	0	0	0	0	0	0	0	0	0	0	0	0	0	0	0
806	2-Methylbenzaldehyde	Cc1ccccc1C=O	0	0	0	0	0	0	0	0	0	0	0	0	0	0	0	0	0	0	0	0	0	0	0	0	0	0	0	0	0	0	0	0	0	0	0	0	0	0	0	0	0	0	0	0	0	0	0
807	3-Methylbenzaldehyde	Cc1cccc(C=O)c1	0	0	0	0	0	0	0	0	0	0	0	0	0	0	0	0	0	0	0	0	0	0	0	0	0	0	0	0	0	0	0	0	0	0	0	0	0	0	0	0	0	0	0	0	0	0	0
808	4-Methylbenzaldehyde	Cc1ccc(C=O)cc1	0	0	0	0	0	0	0	0	0	0	0	0	0	0	0	0	0	0	0	0	0	0	0	0	0	0	0	0	0	0	0	0	0	0	0	0	0	0	0	0	0	0	0	0	0	0	0
809	(4-Methylphenyl)acetaldehyde	Cc1ccc(CC=O)cc1	0	0	0	0	0	0	0	0	0	0	0	0	0	0	0	0	0	0	0	0	0	0	0	0	0	0	0	0	0	0	0	0	0	0	0	0	0	0	0	0	0	0	0	0	0	0	0
810	3-(4-Methylphenyl)-2-propenal	Cc1ccc(C=CC=O)cc1	0	0	0	0	0	0	0	0	0	0	0	0	0	0	0	0	0	0	0	0	0	0	0	0	0	0	0	0	0	0	0	0	0	0	0	0	0	0	0	0	0	0	0	0	0	0	0
811	1,8,8-Trimethyl-2-oxabicyclo[3.2.1]octan-3-one	CC12CCC(CC(=O)O1)C2(C)C	0	0	0	0	0	0	0	0	0	0	0	0	0	0	0	0	0	0	0	0	0	0	0	0	0	0	0	0	0	0	0	0	0	0	0	0	0	0	0	0	0	0	0	0	0	0	0
812	p-Mentha-1,3,5,8-tetraene	C=C(C)c1ccc(C)cc1	0	0	0	0	0	0	0	0	0	0	0	0	0	0	0	0	0	0	0	0	0	0	0	0	0	0	0	0	0	0	0	0	0	0	0	0	0	0	0	0	0	0	0	0	0	0	0
813	2,4,6-Tribromophenol	Oc1c(Br)cc(Br)cc1Br	0	0	0	0	0	0	0	0	0	0	0	0	0	0	0	0	0	0	0	0	0	0	0	0	0	0	0	0	0	0	0	0	0	0	0	0	0	0	0	0	0	0	0	0	0	0	0
814	1,3,5-Trichloro-2-methoxybenzene	COc1c(Cl)cc(Cl)cc1Cl	0	0	0	0	0	0	0	0	0	0	0	0	0	0	0	0	0	0	0	0	0	0	0	0	0	0	0	0	0	0	0	0	0	0	0	0	0	0	0	0	0	0	0	0	0	0	0
815	Phloroacetophenone	CC(=O)c1c(O)cc(O)cc1O	0	0	0	0	0	0	0	0	0	0	0	0	0	0	0	0	0	0	0	0	0	0	0	0	0	0	0	0	0	0	0	0	0	0	0	0	0	0	0	0	0	0	0	0	0	0	0
816	Xanthoxylin	COc1cc(O)c(C(C)=O)c(OC)c1	0	0	0	0	0	0	0	0	0	0	0	0	0	0	0	0	0	0	0	0	0	0	0	0	0	0	0	0	0	0	0	0	0	0	0	0	0	0	0	0	0	0	0	0	0	0	0
817	2',6'-Dihydroxy-4'-methoxyacetophenone	COc1cc(O)c(C(C)=O)c(O)c1	0	0	0	0	0	0	0	0	0	0	0	0	0	0	0	0	0	0	0	0	0	0	0	0	0	0	0	0	0	0	0	0	0	0	0	0	0	0	0	0	0	0	0	0	0	0	0
818	Domesticoside	COc1cc(O)c(C(C)=O)c(OC2OC(CO)C(O)C(O)C2O)c1	0	0	0	0	0	0	0	0	0	0	0	0	0	0	0	0	0	0	0	0	0	0	0	0	0	0	0	0	0	0	0	0	0	0	0	0	0	0	0	0	0	0	0	0	0	0	0
819	2,4,5-Trimethoxybenzaldehyde	COc1cc(OC)c(OC)cc1C=O	0	0	0	0	0	0	0	0	0	0	0	0	0	0	0	0	0	0	0	0	0	0	0	0	0	0	0	0	0	0	0	0	0	0	0	0	0	0	0	0	0	0	0	0	0	0	0
820	Gallaldehyde	O=Cc1cc(O)c(O)c(O)c1	0	0	0	0	0	0	0	0	0	0	0	0	0	0	0	0	0	0	0	0	0	0	0	0	0	0	0	0	0	0	0	0	0	0	0	0	0	1	0	0	0	0	0	0	0	0	0
821	3,5-Dihydroxy-4-methoxybenzaldehyde	COc1c(O)cc(C=O)cc1O	0	0	0	0	0	0	0	0	0	0	0	0	0	0	0	0	0	0	0	0	0	0	0	0	0	0	0	0	0	0	0	0	0	0	0	0	0	0	0	0	0	0	0	0	0	0	0
822	4-Hydroxy-3,5-dimethoxybenzaldehyde	COc1cc(C=O)cc(OC)c1O	0	0	0	0	0	0	0	0	0	0	0	0	0	0	0	0	0	0	0	0	0	0	0	0	0	0	0	0	0	0	0	0	0	0	0	0	0	0	0	0	0	0	0	0	0	0	0
823	2,4,6-Trihydroxybenzoic acid	O=C(O)c1c(O)cc(O)cc1O	0	0	0	0	0	0	0	0	0	0	0	0	0	0	0	0	0	0	0	0	0	0	0	0	0	0	0	0	0	0	0	0	0	0	0	0	0	0	0	0	0	0	0	0	0	0	0
824	Methyl 2,4,6-trihydroxybenzoate	COC(=O)c1c(O)cc(O)cc1O	0	0	0	0	0	0	0	0	0	0	0	0	0	0	0	0	0	0	0	0	0	0	0	0	0	0	0	0	0	0	0	0	0	0	0	0	0	0	0	0	0	0	0	0	0	0	0
825	Phlorisobutyrophenone 2-glucoside	CC(C)C(=O)c1c(O)cc(O)cc1OC1OC(CO)C(O)C(O)C1O	0	0	0	0	0	0	0	0	0	0	0	0	0	0	0	0	0	0	0	0	0	0	0	0	0	0	0	0	0	0	0	0	0	0	0	0	0	0	0	0	0	0	0	0	0	0	0
826	2-(4-Methylphenyl)-2-propanol	Cc1ccc(C(C)(C)O)cc1	0	0	0	0	0	0	0	0	0	0	0	0	0	0	0	0	0	0	0	0	0	0	0	0	0	0	0	0	0	0	0	0	0	0	0	0	0	0	0	0	0	0	0	0	0	0	0
827	1-(1-Methoxy-1-methylethyl)-4-methylbenzene	COC(C)(C)c1ccc(C)cc1	0	0	0	0	0	0	0	0	0	0	0	0	0	0	0	0	0	0	0	0	0	0	0	0	0	0	0	0	0	0	0	0	0	0	0	0	0	0	0	0	0	0	0	0	0	0	0
828	3,6-Epoxy-5,5',6,6'-tetrahydro-b,b-carotene-3',5,5',6'-tetrol	CC(C=CC=C(C)C=CC1(O)C(C)(C)CC(O)CC1(C)O)=CC=CC=C(C)C=CC=C(C)C=CC12OC(CC1(C)C)CC2(C)O	0	0	0	0	0	0	0	0	0	0	0	0	0	0	0	0	0	0	0	0	0	0	0	0	0	0	0	0	0	0	0	0	0	0	0	0	0	0	0	0	0	0	0	0	0	0	0
829	Erinacine G	CC(C)C(=O)CCC1(C)CCC2(C)C(CC=C3C(O)C4(O)COC5OC2C3C5(O)C4O)C1=O	0	0	0	0	0	0	0	0	0	0	0	0	0	0	0	0	0	0	0	0	0	0	0	0	0	0	0	0	0	0	0	0	0	0	0	0	0	0	0	0	0	0	0	0	0	0	0
830	Erinacine E	CC(C)C1=C2C3CC=C4C(O)C5(O)COC6OC(C4C6(O)C5O)C3(C)CCC2(C)CC1	0	0	0	0	0	0	0	0	0	0	0	0	0	0	0	0	0	0	0	0	0	0	0	0	0	0	0	0	0	0	0	0	0	0	0	0	0	0	0	0	0	0	0	0	0	0	0
831	2,4'-Dihydroxyacetophenone	O=C(CO)c1ccc(O)cc1	0	0	0	0	0	0	0	0	0	0	0	0	0	0	0	0	0	0	0	0	0	0	0	0	0	0	0	0	0	0	0	0	0	0	0	0	0	0	0	0	0	0	0	0	0	0	0
832	2',3'-Dihydroxyacetophenone	CC(=O)c1cccc(O)c1O	0	0	0	0	0	0	0	0	0	0	0	0	0	0	0	0	0	0	0	0	0	0	0	0	0	0	0	0	0	0	0	0	0	0	0	0	0	0	0	0	0	0	0	0	0	0	0
833	2',4'-Dihydroxyacetophenone	CC(=O)c1ccc(O)cc1O	0	0	0	0	0	0	0	0	0	0	0	0	0	0	0	0	0	0	0	0	0	0	0	0	0	0	0	0	0	0	0	0	0	0	0	0	0	0	0	0	0	0	0	0	0	0	0
834	2',6'-Dihydroxyacetophenone	CC(=O)c1c(O)cccc1O	0	0	0	0	0	0	0	0	0	0	0	0	0	0	0	0	0	0	0	0	0	0	0	0	0	0	0	0	0	0	0	0	0	0	0	0	0	0	0	0	0	0	0	0	0	0	0
835	3',4'-Dihydroxyacetophenone	CC(=O)c1ccc(O)c(O)c1	0	0	0	0	0	0	0	0	0	0	0	0	0	0	0	0	0	0	0	0	0	0	0	0	0	0	0	0	0	0	0	0	0	0	0	0	0	0	0	0	0	0	0	0	0	0	0
836	Zierin	N#CC(OC1OC(CO)C(O)C(O)C1O)c1cccc(O)c1	0	0	0	0	0	0	0	0	0	0	0	0	0	0	0	0	0	0	0	0	0	0	0	0	0	0	0	0	0	0	0	0	0	0	0	0	0	0	0	0	0	0	0	0	0	0	0
837	3',5'-Dihydroxyacetophenone	CC(=O)c1cc(O)cc(O)c1	0	0	0	0	0	0	0	0	0	0	0	0	0	0	0	0	0	0	0	0	0	0	0	0	0	0	0	0	0	0	0	0	0	0	0	0	0	0	0	0	0	0	0	0	0	0	0
838	Vanillin	COc1cc(C=O)ccc1O	0	0	0	0	0	0	0	0	0	0	0	0	0	0	0	0	0	0	0	0	0	0	0	0	0	0	0	0	0	0	0	0	0	0	0	0	0	0	0	0	0	0	0	0	0	0	0
839	Vanillin acetate	COc1cc(C=O)ccc1OC(C)=O	0	0	0	0	0	0	0	0	0	0	0	0	0	0	0	0	0	0	0	0	0	0	0	0	0	0	0	0	0	0	0	0	0	0	0	0	0	0	0	0	0	0	0	0	0	0	0
840	Vanilloside	COc1cc(C=O)ccc1OC1OC(CO)C(O)C(O)C1O	0	0	0	0	0	0	0	0	0	0	0	0	0	0	0	0	0	0	0	0	0	0	0	0	0	0	0	0	0	0	0	0	0	0	0	0	0	0	0	0	0	0	0	0	0	0	0
841	Ethyl vanillin	CCOc1cc(C=O)ccc1O	0	0	0	0	0	0	0	0	0	0	0	0	0	0	0	0	0	0	0	0	0	0	0	0	0	0	0	0	0	0	0	0	0	0	0	0	0	0	0	0	0	0	0	0	0	0	0
842	2,4-Dihydroxybenzoic acid	O=C(O)c1ccc(O)cc1O	0	0	0	0	0	0	0	0	0	0	0	0	0	0	0	0	0	0	0	0	0	0	0	0	0	0	0	0	0	0	0	0	0	0	0	0	0	0	0	0	0	0	0	0	0	0	0
843	2-Hydroxy-4-methoxybenzoic acid	COc1ccc(C(=O)O)c(O)c1	0	0	0	0	0	0	0	0	0	0	0	0	0	0	0	0	0	0	0	0	0	0	0	0	0	0	0	0	0	0	0	0	0	0	0	0	0	0	0	0	0	0	0	0	0	0	0
844	Gentisic acid	O=C(O)c1cc(O)ccc1O	0	0	0	0	0	0	0	0	0	0	0	0	0	0	0	0	0	0	0	0	0	0	0	0	0	0	0	0	0	0	0	0	0	0	0	0	0	0	0	0	0	0	0	0	0	0	0
845	2,6-Dihydroxybenzoic acid	O=C(O)c1c(O)cccc1O	0	0	0	0	0	0	0	0	0	0	0	0	0	0	0	0	0	0	0	0	0	0	0	0	0	0	0	0	0	0	0	0	0	0	0	0	0	0	0	0	0	0	0	0	0	0	0
846	Vanillic acid	COc1cc(C(=O)O)ccc1O	0	0	0	0	0	0	0	0	0	0	0	0	0	0	0	0	0	0	0	0	0	0	0	0	0	0	0	0	0	0	0	0	0	0	0	0	0	0	0	0	0	0	0	0	0	0	0
847	Protocatechuic acid	O=C(O)c1ccc(O)c(O)c1	0	0	0	0	0	0	0	0	0	0	0	0	0	0	0	0	0	0	0	0	0	0	0	0	0	0	0	0	0	0	0	0	0	0	0	0	0	0	0	0	0	0	0	0	0	0	0
848	3,5-Dihydroxybenzoic acid	O=C(O)c1cc(O)cc(O)c1	0	0	0	0	0	0	0	0	0	0	0	0	0	0	0	0	0	0	0	0	0	0	0	0	0	0	0	0	0	0	0	0	0	0	0	0	0	0	0	0	0	0	0	0	0	0	0
849	Phloretic acid	O=C(O)CCc1ccc(O)cc1	0	0	0	0	0	0	0	0	0	0	0	0	0	0	0	0	0	0	0	0	0	0	0	0	0	0	0	0	0	0	0	0	0	0	0	0	0	0	0	0	0	0	0	0	0	0	0
850	2,3,6-Trimethylphenol	Cc1ccc(C)c(O)c1C	0	0	0	0	0	0	0	0	0	0	0	0	0	0	0	0	0	0	0	0	0	0	0	0	0	0	0	0	0	0	0	0	0	0	0	0	0	0	0	0	0	0	0	0	0	0	0
851	Eremopetasinorol	CC(=O)C1=CC2(C)C(CCC(O)C2C)C1	0	0	0	0	0	0	0	0	0	0	0	0	0	0	0	0	0	0	0	0	0	0	0	0	0	0	0	0	0	0	0	0	0	0	0	0	0	0	0	0	0	0	0	0	0	0	0
852	Eremopetasinorone A	CC(=O)C1=CC2(C)C(CCC(=O)C2C)C1	0	0	0	0	0	0	0	0	0	0	0	0	0	0	0	0	0	0	0	0	0	0	0	0	0	0	0	0	0	0	0	0	0	0	0	0	0	0	0	0	0	0	0	0	0	0	0
853	Eremopetasinorone B	CC(=O)C1=CC2(C)C(CCC(=O)C2C)C1	0	0	0	0	0	0	0	0	0	0	0	0	0	0	0	0	0	0	0	0	0	0	0	0	0	0	0	0	0	0	0	0	0	0	0	0	0	0	0	0	0	0	0	0	0	0	0
854	Epoxyeremopetasinorol	CC(=O)C12CC3CCC(O)C(C)C3(C)C1O2	0	0	0	0	0	0	0	0	0	0	0	0	0	0	0	0	0	0	0	0	0	0	0	0	0	0	0	0	0	0	0	0	0	0	0	0	1	0	0	0	0	0	0	0	0	0	0
855	1,4-Dimethoxybenzene	COc1ccc(OC)cc1	0	0	0	0	0	0	0	0	0	0	0	0	0	0	0	0	0	0	0	0	0	0	0	0	0	0	0	0	0	0	0	0	0	0	0	0	0	0	0	0	0	0	0	0	0	0	0
856	1,3-Dimethoxybenzene	COc1cccc(OC)c1	0	0	0	0	0	0	0	0	0	0	0	0	0	0	0	0	0	0	0	0	0	0	0	0	0	0	0	0	0	0	0	0	0	0	0	0	0	0	0	0	0	0	0	0	0	0	0
857	2-Methoxy-4-vinylphenol	C=Cc1ccc(O)c(OC)c1	0	0	0	0	0	0	0	0	0	0	0	0	0	0	0	0	0	0	0	0	0	0	0	0	0	0	0	0	0	0	0	0	0	0	0	0	0	0	0	0	0	0	0	0	0	0	0
858	2,6-Dimethoxy-1,4-benzoquinone	COC1=CC(=O)C=C(OC)C1=O	0	0	0	0	0	0	0	0	0	0	0	0	0	0	0	0	0	0	0	0	0	0	0	0	0	0	0	0	0	0	0	0	0	0	0	0	0	0	0	0	0	0	0	0	0	0	0
859	2-Chloro-1,3-dimethoxy-5-methylbenzene	COc1cc(C)cc(OC)c1Cl	0	0	0	0	0	0	0	0	0	0	0	0	0	0	0	0	0	0	0	0	0	0	0	0	0	0	0	0	0	0	0	0	0	0	0	0	0	0	0	0	0	0	0	0	0	0	0
860	2,6-Di-tert-butyl-1,4-benzoquinone	CC(C)(C)C1=CC(=O)C=C(C(C)(C)C)C1=O	0	0	0	0	0	0	0	0	0	0	0	0	0	0	0	0	0	0	0	0	0	0	0	0	0	0	0	0	0	0	0	0	0	0	0	0	0	0	0	0	0	0	0	0	0	0	0
861	Diosmetin	COc1ccc(-c2cc(=O)c3c(O)cc(O)cc3o2)cc1O	0	0	0	0	0	0	0	0	0	0	0	0	0	0	0	0	0	0	0	0	0	0	0	0	0	0	0	0	0	0	0	0	0	0	0	0	0	0	0	0	0	0	0	0	0	0	0
862	Zapotinin	COc1cccc(OC)c1-c1cc(=O)c2c(O)c(OC)ccc2o1	0	0	0	0	0	0	0	0	0	0	0	0	0	0	0	0	0	0	0	0	0	0	0	0	0	0	0	0	0	0	0	0	0	0	0	0	0	0	0	0	0	0	0	0	0	0	0
863	Hibiscitrin	O=c1c(OC2OC(CO)C(O)C(O)C2O)c(-c2cc(O)c(O)c(O)c2)oc2c(O)c(O)cc(O)c12	0	0	0	0	0	0	0	0	0	0	0	0	0	0	0	0	0	0	0	0	0	0	0	0	0	0	0	0	0	0	0	0	0	0	0	0	0	1	1	0	0	0	0	0	0	0	0
864	1,8-Dihydroxy-3-hydroxymethylanthraquinone 8-O-b-D-glucoside	O=C1c2cc(CO)cc(O)c2C(=O)c2c(OC3OC(CO)C(O)C(O)C3O)cccc21	0	0	0	0	0	0	0	0	0	0	0	0	0	0	0	0	0	0	0	0	0	0	0	0	0	0	0	0	0	0	0	0	0	0	0	0	0	0	0	0	0	0	0	0	0	0	0
865	2,6-Dimethoxy-4-methylphenol	COc1cc(C)cc(OC)c1O	0	0	0	0	0	0	0	0	0	0	0	0	0	0	0	0	0	0	0	0	0	0	0	0	0	0	0	0	0	0	0	0	0	0	0	0	0	0	0	0	0	0	0	0	0	0	0
866	3-p-Coumaroylquinic acid	O=C(C=Cc1ccc(O)cc1)OC1CC(O)(C(=O)O)CC(O)C1O	0	0	0	0	0	0	0	0	0	0	0	0	0	0	0	0	0	0	0	0	0	0	0	0	0	0	0	0	0	0	0	0	0	0	0	0	0	0	0	0	0	0	0	0	0	0	0
867	(+)-Asarinin	c1cc2c(cc1C1OCC3C(c4ccc5c(c4)OCO5)OCC13)OCO2	0	0	0	0	0	0	0	0	0	0	0	0	0	0	0	0	0	0	0	0	0	0	0	0	0	0	0	0	0	0	0	0	0	0	0	0	0	0	0	0	0	0	0	0	0	0	0
868	Cyclovariegatin	O=C1C(c2ccc(O)c(O)c2)=C(O)C(=O)c2c1oc1cc(O)c(O)cc21	0	0	0	0	0	0	0	0	0	0	0	0	0	0	0	0	0	0	0	0	0	0	0	0	0	0	0	0	0	0	0	0	0	0	0	0	0	0	0	0	0	0	0	0	0	0	0
869	2-Hydroxy-6-pentadecylbenzoic acid	CCCCCCCCCCCCCCCc1cccc(O)c1C(=O)O	0	0	0	0	0	0	0	0	0	0	0	0	0	0	0	0	0	0	0	0	0	0	0	0	0	0	0	0	0	0	0	1	0	0	0	0	0	0	0	0	0	0	0	0	0	0	0
870	Melizame	Oc1cccc(Oc2nnn[nH]2)c1	0	0	0	0	0	0	0	0	0	0	0	0	0	0	0	0	0	0	0	0	0	0	0	0	0	0	0	0	0	0	0	0	0	0	0	0	0	0	0	0	0	0	0	0	0	0	0
871	4-Ethoxy-3-methoxybenzaldehyde	CCOc1ccc(C=O)cc1OC	0	0	0	0	0	0	0	0	0	0	0	0	0	0	0	0	0	0	0	0	0	0	0	0	0	0	0	0	0	0	0	0	0	0	0	0	0	0	0	0	0	0	0	0	0	0	0
872	4-Methoxybenzaldehyde	COc1ccc(C=O)cc1	0	0	0	0	0	0	0	0	0	0	0	0	0	0	0	0	0	0	0	0	0	0	0	0	0	0	0	0	0	0	0	0	0	0	0	0	0	0	0	0	0	0	0	0	0	0	0
873	3,6-Dimethoxy-4-phenanthrenol	COc1ccc2ccc3ccc(OC)c(O)c3c2c1	0	0	0	0	0	0	0	0	0	0	0	0	0	0	0	0	0	0	0	0	0	0	0	0	0	0	0	0	0	0	0	0	0	0	0	0	0	0	0	0	0	0	0	0	0	0	0
874	2-Ethoxynaphthalene	CCOc1ccc2ccccc2c1	0	0	0	0	0	0	0	0	0	0	0	0	0	0	0	0	0	0	0	0	0	0	0	0	0	0	0	0	0	0	0	0	0	0	0	0	0	0	0	0	0	0	0	0	0	0	0
875	2-Naphthalenethiol	Sc1ccc2ccccc2c1	0	0	0	0	0	0	0	0	0	0	0	0	0	0	0	0	0	0	0	0	0	0	0	0	0	0	0	0	0	0	0	0	0	0	0	1	0	0	0	0	0	0	0	0	0	0	0
876	Octacosanal	CCCCCCCCCCCCCCCCCCCCCCCCCCCC=O	0	0	0	0	0	0	0	0	0	0	0	0	0	0	0	0	0	0	0	0	0	0	0	0	0	0	0	0	0	0	0	1	0	0	0	0	0	0	0	0	0	0	0	0	0	0	0
877	2-Naphthol	Oc1ccc2ccccc2c1	0	0	0	0	0	0	0	0	0	0	0	0	0	0	0	0	0	0	0	0	0	0	0	0	0	0	0	0	0	0	0	0	0	0	0	0	0	0	0	0	0	0	0	0	0	0	0
878	Wine lactone	CC1=CC2OC(=O)C(C)C2CC1	0	0	0	0	0	0	0	0	0	0	0	0	0	0	0	0	0	0	0	0	0	0	0	0	0	0	0	0	0	0	0	0	0	0	0	0	0	0	0	0	0	0	0	0	0	0	0
879	Erinacine F	CC(C)C1=C2C3CC=C4C(O)C5(O)COC6OC(C4C6(O)C5O)C3(C)CCC2(C)CC1	0	0	0	0	0	0	0	0	0	0	0	0	0	0	0	0	0	0	0	0	0	0	0	0	0	0	0	0	0	0	0	0	0	0	0	0	0	0	0	0	0	0	0	0	0	0	0
880	Sodium lactate	CC(O)C(=O)[O-].[Na+]	0	0	0	0	0	0	0	0	0	0	0	0	0	0	0	0	0	0	0	0	0	0	0	0	0	0	0	0	0	0	0	0	0	0	0	0	0	0	0	0	0	0	0	0	0	0	0
881	Calcium lactate	CC(O)C(=O)O	0	0	0	0	0	0	0	0	0	0	0	0	0	0	0	0	0	0	0	0	0	0	0	0	0	0	0	0	0	0	0	0	0	0	0	0	0	0	0	0	0	0	0	0	0	0	0
882	Salicylic acid	O=C(O)c1ccccc1O	0	0	0	0	0	0	0	0	0	0	0	0	0	0	0	0	0	0	0	0	0	0	0	0	0	0	0	0	0	0	0	0	0	0	0	0	0	0	0	0	0	0	0	0	0	0	0
883	S-Methyl benzenecarbothioate	CSC(=O)c1ccccc1	0	0	0	0	0	0	0	0	0	0	0	0	0	0	0	0	0	0	0	0	0	0	0	0	0	0	0	0	0	0	0	0	0	0	0	0	0	0	0	0	0	0	0	0	0	0	0
884	Hexacosanal	CCCCCCCCCCCCCCCCCCCCCCCCCC=O	0	0	0	0	0	0	0	0	0	0	0	0	0	0	0	0	0	0	0	0	0	0	0	0	0	0	0	0	0	0	0	1	0	0	0	0	0	0	0	0	0	0	0	0	0	0	0
885	Hydroquinone	Oc1ccc(O)cc1	0	0	0	0	0	0	0	0	0	0	0	0	0	0	0	0	0	0	0	0	0	0	0	0	0	0	0	0	0	0	0	0	0	0	0	0	0	0	0	0	0	0	0	0	0	0	0
886	Mequinol	COc1ccc(O)cc1	0	0	0	0	0	0	0	0	0	0	0	0	0	0	0	0	0	0	0	0	0	0	0	0	0	0	0	0	0	0	0	0	0	0	0	0	0	0	0	0	0	0	0	0	0	0	0
887	Cinnamyl alcohol	OCC=Cc1ccccc1	0	0	0	0	0	0	0	0	0	0	0	0	0	0	0	0	0	0	0	0	0	0	0	0	0	0	0	0	0	0	0	0	0	0	0	0	0	0	0	0	0	0	0	0	0	0	0
888	trans-Cinnamyl alcohol	OCC=Cc1ccccc1	0	0	0	0	0	0	0	0	0	0	0	0	0	0	0	0	0	0	0	0	0	0	0	0	0	0	0	0	0	0	0	0	0	0	0	0	0	0	0	0	0	0	0	0	0	0	0
889	Cinnamyl acetate	CC(=O)OCC=Cc1ccccc1	0	0	0	0	0	0	0	0	0	0	0	0	0	0	0	0	0	0	0	0	0	0	0	0	0	0	0	0	0	0	0	0	0	0	0	0	0	0	0	0	0	0	0	0	0	0	0
890	trans-Cinnamyl benzoate	O=C(OCC=Cc1ccccc1)c1ccccc1	0	0	0	0	0	0	0	0	0	0	0	0	0	0	0	0	0	0	0	0	0	0	0	0	0	0	0	0	0	0	0	0	0	0	0	0	0	0	0	0	0	0	0	0	0	0	0
891	2-Methyloctacosane	CCCCCCCCCCCCCCCCCCCCCCCCCCC(C)C	0	0	0	0	0	0	0	0	0	0	0	0	0	0	0	0	0	0	0	0	0	0	0	0	0	0	0	0	0	0	0	1	0	0	0	0	0	0	0	0	0	0	0	0	0	0	0
892	Erythrosine	O=C1OC2(c3ccccc31)c1cc(I)c(O)c(I)c1Oc1c2cc(I)c(O)c1I	0	0	0	0	0	0	0	0	0	0	0	0	0	0	0	0	0	0	0	0	0	0	0	0	0	0	0	0	0	0	0	0	0	0	0	0	0	0	0	0	0	0	0	0	0	0	0
893	Phenol	Oc1ccccc1	0	0	0	0	0	0	0	0	0	0	0	0	0	0	0	0	0	0	0	0	0	0	0	0	0	0	0	0	0	0	0	0	0	0	0	0	0	0	0	0	0	0	0	0	0	0	0
894	Acetylsalicylic acid	CC(=O)Oc1ccccc1C(=O)O	0	0	0	0	0	0	0	0	0	0	0	0	0	0	0	0	0	0	0	0	0	0	0	0	0	0	0	0	0	0	0	0	0	0	0	0	0	0	0	0	0	0	0	0	0	0	0
895	(R)-Norepinephrine	NCC(O)c1ccc(O)c(O)c1	0	0	0	0	0	0	0	0	0	0	0	0	0	0	0	0	0	0	0	0	0	0	0	0	0	0	0	0	0	0	0	0	0	0	0	0	0	0	0	0	0	0	0	0	0	0	0
896	Anthranilic acid	Nc1ccccc1C(=O)O	0	0	0	0	0	0	0	0	0	0	0	0	0	0	0	0	0	0	0	0	0	0	0	0	0	0	0	0	0	0	0	0	0	0	0	0	0	0	0	0	0	0	0	0	0	0	0
897	Methyl anthranilate	COC(=O)c1ccccc1N	0	0	0	0	0	0	0	0	0	0	0	0	0	0	0	0	0	0	0	0	0	0	0	0	0	0	0	0	0	0	0	0	0	0	0	0	0	0	0	0	0	0	0	0	0	0	0
898	1-(2,6,6-Trimethyl-2-cyclohexen-1-yl)-1,6-heptadien-3-one	C=CCCC(=O)C=CC1C(C)=CCCC1(C)C	0	0	0	0	0	0	0	0	0	0	0	0	0	0	0	0	0	0	0	0	0	0	0	0	0	0	0	0	0	0	0	0	0	0	0	0	0	0	0	0	0	0	0	0	0	0	0
899	(Ã¥Â±)-Leucine	CC(C)CC(N)C(=O)O	0	0	0	0	0	0	0	0	0	0	0	0	0	0	0	0	0	0	0	0	0	0	0	0	0	0	0	0	0	0	0	0	0	0	0	0	0	0	0	0	0	0	0	0	0	0	0
900	2-Amino-3-methylimidazo[4,5-f]quinoline	Cn1c(N)nc2c3cccnc3ccc21	0	0	0	0	0	0	0	0	0	0	0	0	0	0	0	0	0	0	0	0	0	0	0	0	0	0	0	0	0	0	0	0	0	0	0	0	0	0	0	0	0	0	0	0	0	0	0
901	2-Amino-3,4-dimethylimidazo[4,5-f]quinoline	Cc1cc2ncccc2c2nc(N)n(C)c12	0	0	0	0	0	0	0	0	0	0	0	0	0	0	0	0	0	0	0	0	0	0	0	0	0	0	0	0	0	0	0	0	0	0	0	0	0	0	0	0	0	0	0	0	0	0	0
902	5,6,7,8-Tetrahydro-2,4-dimethylquinoline	Cc1cc(C)c2c(n1)CCCC2	0	0	0	0	0	0	0	0	0	0	0	0	0	0	0	0	0	0	0	0	0	0	0	0	0	0	0	0	0	0	0	0	0	0	0	0	0	0	0	0	0	0	0	0	0	0	0
903	5,6,7,8-Tetrahydro-4-methylquinoline	Cc1ccnc2c1CCCC2	0	0	0	0	0	0	0	0	0	0	0	0	0	0	0	0	0	0	0	0	0	0	0	0	0	0	0	0	0	0	0	0	0	0	0	0	0	0	0	0	0	0	0	0	0	0	0
904	(R)-2,4-Dihydroxy-7-methoxy-2H-1,4-benzoxazin-3(4H)-one 2-glucoside	COc1ccc2c(c1)OC(OC1OC(CO)C(O)C(O)C1O)C(=O)N2O	0	0	0	0	0	0	0	0	0	0	0	0	0	0	0	0	0	0	0	0	0	0	0	0	0	0	0	0	0	0	0	0	0	0	0	0	0	0	0	0	0	0	0	0	0	0	0
905	Maritimetin	O=C1C(=Cc2ccc(O)c(O)c2)Oc2c1ccc(O)c2O	0	0	0	0	0	0	0	0	0	0	0	0	0	0	0	0	0	0	0	0	0	0	0	0	0	0	0	0	0	0	0	0	0	0	0	0	0	0	0	0	0	0	0	0	0	0	0
906	Thiabendazole	c1ccc2[nH]c(-c3cncs3)nc2c1	0	0	0	0	0	0	0	0	0	0	0	0	0	0	0	0	0	0	0	0	0	0	0	0	0	0	0	0	0	0	0	0	0	0	0	0	0	0	0	0	0	0	0	0	0	0	0
907	Thiazole	c1cscn1	0	0	0	0	0	0	0	0	0	0	0	0	0	0	0	0	0	0	0	0	0	0	0	0	0	0	0	0	0	0	0	0	0	0	0	0	0	0	0	0	0	0	0	0	0	0	0
908	4,5-Dihydro-1-benzoxepin-3(2H)-one	O=C1CCc2ccccc2OC1	0	0	0	0	0	0	0	0	0	0	0	0	0	0	0	0	0	0	0	0	0	0	0	0	0	0	0	0	0	0	0	0	0	0	0	0	0	0	0	0	0	0	0	0	0	0	0
909	2-(2-Thienyl)furan	c1coc(-c2cccs2)c1	0	0	0	0	0	0	0	0	0	0	0	0	0	0	0	0	0	0	0	0	0	0	0	0	0	0	0	0	0	0	0	0	0	0	0	0	0	0	0	0	0	0	0	0	0	0	0
910	Liquid thiophthene	c1cc2ccsc2s1	0	0	0	0	0	0	0	0	0	0	0	0	0	0	0	0	0	0	0	0	0	0	0	0	0	0	0	0	0	0	0	0	0	0	0	0	0	0	0	0	0	0	0	0	0	0	0
911	2-Thiophenecarboxaldehyde	O=Cc1cccs1	0	0	0	0	0	0	0	0	0	0	0	0	0	0	0	0	0	0	0	0	0	0	0	0	0	0	0	0	0	0	0	0	0	0	0	0	0	0	0	0	0	0	0	0	0	0	0
912	Thiophene	c1ccsc1	0	0	0	0	0	0	0	0	0	0	0	0	0	0	0	0	0	0	0	0	0	0	0	0	0	0	0	0	0	0	0	0	0	0	0	0	0	0	0	0	0	0	0	0	0	0	0
913	Methyl thiophene-2-carboxylate	COC(=O)c1cccs1	0	0	0	0	0	0	0	0	0	0	0	0	0	0	0	0	0	0	0	0	0	0	0	0	0	0	0	0	0	0	0	0	0	0	0	0	0	0	0	0	0	0	0	0	0	0	0
914	2-Thiophenethiol	Sc1cccs1	0	0	0	0	0	0	0	0	0	0	0	0	0	0	0	0	0	0	0	0	0	0	0	0	0	0	0	0	0	0	0	0	0	0	0	1	0	0	0	0	0	0	0	0	0	0	0
915	2,3,5-Trimethylfuran	Cc1cc(C)c(C)o1	0	0	0	0	0	0	0	0	0	0	0	0	0	0	0	0	0	0	0	0	0	0	0	0	0	0	0	0	0	0	0	0	0	0	0	0	0	0	0	0	0	0	0	0	0	0	0
916	1,2,5-Trimethyl-1H-pyrrole	Cc1ccc(C)n1C	0	0	0	0	0	0	0	0	0	0	0	0	0	0	0	0	0	0	0	0	0	0	0	0	0	0	0	0	0	0	0	0	0	0	0	0	0	0	0	0	0	0	0	0	0	0	0
917	Tryptamine	NCCc1c[nH]c2ccccc12	0	0	0	0	0	0	0	0	0	0	0	0	0	0	0	0	0	0	0	0	0	0	0	0	0	0	0	0	0	0	0	0	0	0	0	0	0	0	0	0	0	0	0	0	0	0	0
918	Saccharin	O=C1NS(=O)(=O)c2ccccc21	0	0	0	0	0	0	0	0	0	0	0	0	0	0	0	0	0	0	0	0	0	0	0	0	0	0	0	0	0	0	0	0	0	0	0	0	0	0	0	0	0	0	0	0	0	0	0
919	Saccharin sodium	O=C1NS(=O)(=O)c2ccccc21.[Na+]	0	0	0	0	0	0	0	0	0	0	0	0	0	0	0	0	0	0	0	0	0	0	0	0	0	0	0	0	0	0	0	0	0	0	0	0	0	0	0	0	0	0	0	0	0	0	0
920	Saccharin calcium	O=S1(=O)N=C([O-])c2ccccc21.O=S1(=O)N=C([O-])c2ccccc21.[Ca+2]	0	0	0	0	0	0	0	0	0	0	0	0	0	0	0	0	0	0	0	0	0	0	0	0	0	0	0	0	0	0	0	0	0	0	0	0	0	0	0	0	0	0	0	0	0	0	0
921	Urocanic acid	O=C(O)C=Cc1c[nH]cn1	0	0	0	0	0	0	0	0	0	0	0	0	0	0	0	0	0	0	0	0	0	0	0	0	0	0	0	0	0	0	0	0	0	0	0	0	0	0	0	0	0	0	0	0	0	0	0
922	2-Vinylthiophene	C=Cc1cccs1	0	0	0	0	0	0	0	0	0	0	0	0	0	0	0	0	0	0	0	0	0	0	0	0	0	0	0	0	0	0	0	0	0	0	0	0	0	0	0	0	0	0	0	0	0	0	0
923	5-Ethyl-2,3-dimethylpyrazine	CCc1cnc(C)c(C)n1	0	0	0	0	0	0	0	0	0	0	0	0	0	0	0	0	0	0	0	0	0	0	0	0	0	0	0	0	0	0	0	0	0	0	0	0	0	0	0	0	0	0	0	0	0	0	0
924	2-Ethyl-5-methylfuran	CCc1ccc(C)o1	0	0	0	0	0	0	0	0	0	0	0	0	0	0	0	0	0	0	0	0	0	0	0	0	0	0	0	0	0	0	0	0	0	0	0	0	0	0	0	0	0	0	0	0	0	0	0
925	5-Ethyl-2-methylpyridine	CCc1ccc(C)nc1	0	0	0	0	0	0	0	0	0	0	0	0	0	0	0	0	0	0	0	0	0	0	0	0	0	0	0	0	0	0	0	0	0	0	0	0	0	0	0	0	0	0	0	0	0	0	0
926	2-Ethyl-4-methylthiazole	CCc1nc(C)cs1	0	0	0	0	0	0	0	0	0	0	0	0	0	0	0	0	0	0	0	0	0	0	0	0	0	0	0	0	0	0	0	0	0	0	0	0	0	0	0	0	0	0	0	0	0	0	0
927	4-Ethyl-2-methylthiazole	CCc1csc(C)n1	0	0	0	0	0	0	0	0	0	0	0	0	0	0	0	0	0	0	0	0	0	0	0	0	0	0	0	0	0	0	0	0	0	0	0	0	0	0	0	0	0	0	0	0	0	0	0
928	5-Ethyl-4-methylthiazole	CCc1scnc1C	0	0	0	0	0	0	0	0	0	0	0	0	0	0	0	0	0	0	0	0	0	0	0	0	0	0	0	0	0	0	0	0	0	0	0	0	0	0	0	0	0	0	0	0	0	0	0
929	2-Ethyl-5-methylthiophene	CCc1ccc(C)s1	0	0	0	0	0	0	0	0	0	0	0	0	0	0	0	0	0	0	0	0	0	0	0	0	0	0	0	0	0	0	0	0	0	0	0	0	0	0	0	0	0	0	0	0	0	0	0
930	3-Ethylpyridine	CCc1cccnc1	0	0	0	0	0	0	0	0	0	0	0	0	0	0	0	0	0	0	0	0	0	0	0	0	0	0	0	0	0	0	0	0	0	0	0	0	0	0	0	0	0	0	0	0	0	0	0
931	5-Ethynyl-5'-(1-propynyl)-2,2'-bithiophene	C#Cc1ccc(-c2ccc(C#CC)s2)s1	0	0	0	0	0	0	0	0	0	0	0	0	0	0	0	0	0	0	0	0	0	0	0	0	0	0	0	0	0	0	0	0	0	0	0	0	0	0	0	0	0	0	0	0	0	0	0
932	1H-Imidazole-1-acetic acid	O=C(O)Cn1ccnc1	0	0	0	0	0	0	0	0	0	0	0	0	0	0	0	0	0	0	0	0	0	0	0	0	0	0	0	0	0	0	0	0	0	0	0	0	0	0	0	0	0	0	0	0	0	0	0
933	1H-Indole-3-acetic acid	O=C(O)Cc1c[nH]c2ccccc12	0	0	0	0	0	0	0	0	0	0	0	0	0	0	0	0	0	0	0	0	0	0	0	0	0	0	0	0	0	0	0	0	0	0	0	0	0	0	0	0	0	0	0	0	0	0	0
934	1H-Indole-3-carboxaldehyde	O=Cc1c[nH]c2ccccc12	0	0	0	0	0	0	0	0	0	0	0	0	0	0	0	0	0	0	0	0	0	0	0	0	0	0	0	0	0	0	0	0	0	0	0	0	0	0	0	0	0	0	0	0	0	0	0
935	Indole-beta-carboxylic acid	O=C(O)c1c[nH]c2ccccc12	0	0	0	0	0	0	0	0	0	0	0	0	0	0	0	0	0	0	0	0	0	0	0	0	0	0	0	0	0	0	0	0	0	0	0	0	0	0	0	0	0	0	0	0	0	0	0
936	Indole-3-methyl acetate	COC(=O)Cc1c[nH]c2ccccc12	0	0	0	0	0	0	0	0	0	0	0	0	0	0	0	0	0	0	0	0	0	0	0	0	0	0	0	0	0	0	0	0	0	0	0	0	0	0	0	0	0	0	0	0	0	0	0
937	1H-Indole-3-acetamide	N=C(O)Cc1c[nH]c2ccccc12	0	0	0	0	0	0	0	0	0	0	0	0	0	0	0	0	0	0	0	0	0	0	0	0	0	0	0	0	0	0	0	0	0	0	0	0	0	0	0	0	0	0	0	0	0	0	0
938	3-(1H-Indol-3-yl)-2-propenoic acid	O=C(O)C=Cc1c[nH]c2ccccc12	0	0	0	0	0	0	0	0	0	0	0	0	0	0	0	0	0	0	0	0	0	0	0	0	0	0	0	0	0	0	0	0	0	0	0	0	0	0	0	0	0	0	0	0	0	0	0
939	1H-Indole-3-methanol	OCc1c[nH]c2ccccc12	0	0	0	0	0	0	0	0	0	0	0	0	0	0	0	0	0	0	0	0	0	0	0	0	0	0	0	0	0	0	0	0	0	0	0	0	0	0	0	0	0	0	0	0	0	0	0
940	1H-Indole-3-methanamine	NCc1c[nH]c2ccccc12	0	0	0	0	0	0	0	0	0	0	0	0	0	0	0	0	0	0	0	0	0	0	0	0	0	0	0	0	0	0	0	0	0	0	0	0	0	0	0	0	0	0	0	0	0	0	0
941	1H-Indole-3-propanoic acid	O=C(O)CCc1c[nH]c2ccccc12	0	0	0	0	0	0	0	0	0	0	0	0	0	0	0	0	0	0	0	0	0	0	0	0	0	0	0	0	0	0	0	0	0	0	0	0	0	0	0	0	0	0	0	0	0	0	0
942	2-Isopropyl-3,5-dimethoxy-6-methylpyrazine	COc1nc(OC)c(C(C)C)nc1C	0	0	0	0	0	0	0	0	0	0	0	0	0	0	0	0	0	0	0	0	0	0	0	0	0	0	0	0	0	0	0	0	0	0	0	0	0	0	0	0	0	0	0	0	0	0	0
943	3-Isopropyl-2-methoxy-5-methylpyrazine	COc1ncc(C)nc1C(C)C	0	0	0	0	0	0	0	0	0	0	0	0	0	0	0	0	0	0	0	0	0	0	0	0	0	0	0	0	0	0	0	0	0	0	0	0	0	0	0	0	0	0	0	0	0	0	0
944	9H-Carbazole-3-carboxaldehyde	O=Cc1ccc2[nH]c3ccccc3c2c1	0	0	0	0	0	0	0	0	0	0	0	0	0	0	0	0	0	0	0	0	0	0	0	0	0	0	0	0	0	0	0	0	0	0	0	0	0	0	0	0	0	0	0	0	0	0	0
945	Methyl 3-carbazolecarboxylate	COC(=O)c1ccc2[nH]c3ccccc3c2c1	0	0	0	0	0	0	0	0	0	0	0	0	0	0	0	0	0	0	0	0	0	0	0	0	0	0	0	0	0	0	0	0	0	0	0	0	0	0	0	0	0	0	0	0	0	0	0
946	Fenbendazole	COC(=O)Nc1nc2cc(Sc3ccccc3)ccc2[nH]1	0	0	0	0	0	0	0	0	0	0	0	0	0	0	0	0	0	0	0	0	0	0	0	0	0	0	0	0	0	0	0	0	0	0	0	0	0	0	0	0	0	0	0	0	0	0	0
947	3-Amino-1,4-dimethyl-5H-pyrido[4,3-b]indole	Cc1c(N)nc(C)c2c1[nH]c1ccccc12	0	0	0	0	0	0	0	0	0	0	0	0	0	0	0	0	0	0	0	0	0	0	0	0	0	0	0	0	0	0	0	0	0	0	0	0	0	0	0	0	0	0	0	0	0	0	0
948	2-Amino-5-phenylpyridine	Nc1ccc(-c2ccccc2)cn1	0	0	0	0	0	0	0	0	0	0	0	0	0	0	0	0	0	0	0	0	0	0	0	0	0	0	0	0	0	0	0	0	0	0	0	0	0	0	0	0	0	0	0	0	0	0	0
949	2-Aminodipyrido[1,2-a:3',2'-d]imidazole	Nc1ccc2nc3ccccn3c2n1	0	0	0	0	0	0	0	0	0	0	0	0	0	0	0	0	0	0	0	0	0	0	0	0	0	0	0	0	0	0	0	0	0	0	0	0	0	0	0	0	0	0	0	0	0	0	0
950	2-Amino-6-methyldipyrido[1,2-a:3',2'-d]imidazole	Cc1cccn2c1nc1ccc(=N)[nH]c12	0	0	0	0	0	0	0	0	0	0	0	0	0	0	0	0	0	0	0	0	0	0	0	0	0	0	0	0	0	0	0	0	0	0	0	0	0	0	0	0	0	0	0	0	0	0	0
951	2-Furancarboxylic acid	O=C(O)c1ccco1	0	0	0	0	0	0	0	0	0	0	0	0	0	0	0	0	0	0	0	0	0	0	0	0	0	0	0	0	0	0	0	0	0	0	0	0	0	0	0	0	0	0	0	0	0	0	0
952	Methyl 2-furoate	COC(=O)c1ccco1	0	0	0	0	0	0	0	0	0	0	0	0	0	0	0	0	0	0	0	0	0	0	0	0	0	0	0	0	0	0	0	0	0	0	0	0	0	0	0	0	0	0	0	0	0	0	0
953	Menadione	CC1=CC(=O)c2ccccc2C1=O	0	0	0	0	0	0	0	0	0	0	0	0	0	0	0	0	0	0	0	0	0	0	0	0	0	0	0	0	0	0	0	0	0	0	0	0	0	0	0	0	0	0	0	0	0	0	0
954	Naphthalene	c1ccc2ccccc2c1	0	0	0	0	0	0	0	0	0	0	0	0	0	0	0	0	0	0	0	0	0	0	0	0	0	0	0	0	0	0	0	0	0	0	0	0	0	0	0	0	0	0	0	0	0	0	0
955	Dantron	O=C1c2cccc(O)c2C(=O)c2c(O)cccc21	0	0	0	0	0	0	0	0	0	0	0	0	0	0	0	0	0	0	0	0	0	0	0	0	0	0	0	0	0	0	0	0	0	0	0	0	0	0	0	0	0	0	0	0	0	0	0
956	Frusemide	NS(=O)(=O)c1cc(C(=O)O)c(NCc2ccco2)cc1Cl	0	0	0	0	0	0	0	0	0	0	0	0	0	0	0	0	0	0	0	0	0	0	0	0	0	0	0	0	0	0	0	0	0	0	0	0	0	0	0	0	0	0	0	0	0	0	0
957	Furazolidone	O=C1OCCN1N=Cc1ccc([N+](=O)[O-])o1	0	0	0	0	0	0	0	0	0	0	0	0	0	0	0	0	0	0	0	0	0	0	0	0	0	0	0	0	0	0	0	0	0	0	0	0	0	0	0	0	0	0	0	0	0	0	0
958	Procyanidin B1	Oc1cc(O)c2c(c1)OC(c1ccc(O)c(O)c1)C(O)C2c1c(O)cc(O)c2c1OC(c1ccc(O)c(O)c1)C(O)C2	0	0	0	0	0	0	0	0	0	0	0	0	0	0	0	0	0	0	0	0	0	0	0	0	0	0	0	0	0	0	0	0	0	0	0	0	0	0	0	0	0	0	0	0	0	0	0
959	3-Thiocyanato-1-propene	C=CCSC#N	0	0	0	0	0	0	0	0	0	0	0	0	0	0	0	0	0	0	0	0	0	0	0	0	0	0	0	0	0	0	0	0	0	0	0	0	0	0	0	0	1	0	0	0	0	0	0
960	(1R,2S,3R)-2-Acetyl-4(5)-(1,2,3,4-tetrahydroxybutyl)imidazole	CC(=O)c1nc(C(O)C(O)C(O)CO)c[nH]1	0	0	0	0	0	0	0	0	0	0	0	0	0	0	0	0	0	0	0	0	0	0	0	0	0	0	0	0	0	0	0	0	0	0	0	0	0	0	0	0	0	0	0	0	0	0	0
961	4-Hydroxybenzeneacetonitrile	N#CCc1ccc(O)cc1	0	0	0	0	0	0	0	0	0	0	0	0	0	0	0	0	0	0	0	0	0	0	0	0	0	0	0	0	0	0	0	0	0	0	0	0	0	0	0	0	0	0	0	0	0	0	0
962	Skimmin	O=c1ccc2ccc(OC3OC(CO)C(O)C(O)C3O)cc2o1	0	0	0	0	0	0	0	0	0	0	0	0	0	0	0	0	0	0	0	0	0	0	0	0	0	0	0	0	0	0	0	0	0	0	0	0	0	0	0	0	0	0	0	0	0	0	0
963	Herniarin	COc1ccc2ccc(=O)oc2c1	0	0	0	0	0	0	0	0	0	0	0	0	0	0	0	0	0	0	0	0	0	0	0	0	0	0	0	0	0	0	0	0	0	0	0	0	0	0	0	0	0	0	0	0	0	0	0
964	2-Acetyl-1-ethylpyrrole	CCn1cccc1C(C)=O	0	0	0	0	0	0	0	0	0	0	0	0	0	0	0	0	0	0	0	0	0	0	0	0	0	0	0	0	0	0	0	0	0	0	0	0	0	0	0	0	0	0	0	0	0	0	0
965	1,1-Diethoxy-2-hexene	CCCC=CC(OCC)OCC	0	0	0	0	0	0	0	0	0	0	0	0	0	0	0	0	0	0	0	0	0	0	0	0	0	0	0	0	0	0	0	0	0	0	0	0	0	0	0	0	0	0	0	0	0	0	0
966	Ethyl (Ã¥Â±)-2-methyl-4-pentenoate	C=CCC(C)C(=O)OCC	0	0	0	0	0	0	0	0	0	0	0	0	0	0	0	0	0	0	0	0	0	0	0	0	0	0	0	0	0	0	0	0	0	0	0	0	0	0	0	0	0	0	0	0	0	0	0
967	Methyl (Ã¥Â±)-2-Methylbutanoate	CCC(C)C(=O)OC	0	0	0	0	0	0	0	0	0	0	0	0	0	0	0	0	0	0	0	0	0	0	0	0	0	0	0	0	0	0	0	0	0	0	0	0	0	0	0	0	0	0	0	0	0	0	0
968	Pentyl pentanoate	CCCCCOC(=O)CCCC	0	0	0	0	0	0	0	0	0	0	0	0	0	0	0	0	0	0	0	0	0	0	0	0	0	0	0	0	0	0	0	0	0	0	0	0	0	0	0	0	0	0	0	0	0	0	0
969	Allyl nonanoate	C=CCOC(=O)CCCCCCCC	0	0	0	0	0	0	0	0	0	0	0	0	0	0	0	0	0	0	0	0	0	0	0	0	0	0	0	0	0	0	0	1	0	0	0	0	0	0	0	0	0	0	0	0	0	0	0
970	N-Acetyl-L-serine	CC(=O)NC(CO)C(=O)O	0	0	0	0	0	0	0	0	0	0	0	0	0	0	0	0	0	0	0	0	0	0	0	0	0	0	0	0	0	0	0	0	0	0	0	0	0	0	0	0	0	0	0	0	0	0	0
971	Propylene glycol stearate	CCCCCCCCCCCCCCCCCC(=O)OCC(C)O	0	0	0	0	0	0	0	0	0	0	0	0	0	0	0	0	0	0	0	0	0	0	0	0	0	0	0	0	0	0	0	1	0	0	0	0	0	0	0	0	0	0	0	0	0	0	0
972	9-Pentadecenoic acid	CCCCCC=CCCCCCCCC(=O)O	0	0	0	0	0	0	0	0	0	0	0	0	0	0	0	0	0	0	0	0	0	0	0	0	0	0	0	0	0	0	0	1	0	0	0	0	0	0	0	0	0	0	0	0	0	0	0
973	(3S,7E,9R)-4,7-Megastigmadiene-3,9-diol 9-[apiosyl-(1->6)-glucoside]	CC1=CC(O)CC(C)(C)C1C=CC(C)OC1OC(COC2OCC(O)(CO)C2O)C(O)C(O)C1O	0	0	0	0	0	0	0	0	0	0	0	0	0	0	0	0	0	0	0	0	0	0	0	0	0	0	0	0	0	0	0	0	0	0	0	0	0	0	0	0	0	0	0	0	0	0	0
974	Saringosterol 3-glucoside	C=CC(O)(CCC(C)C1CCC2C3CC=C4CC(OC5OC(CO)C(O)C(O)C5O)CCC4(C)C3CCC12C)C(C)C	0	0	0	0	0	0	0	0	0	0	0	0	0	0	0	0	0	0	0	0	0	0	0	0	0	0	0	0	0	0	0	0	0	0	0	0	0	0	0	0	0	0	0	0	0	0	0
975	Isofucosterol glucoside	CC=C(CCC(C)C1CCC2C3CC=C4CC(OC5OC(CO)C(O)C(O)C5O)CCC4(C)C3CCC12C)C(C)C	0	0	0	0	0	0	0	0	0	0	0	0	0	0	0	0	0	0	0	0	0	0	0	0	0	0	0	0	0	0	0	0	0	0	0	0	0	0	0	0	0	0	0	0	0	0	0
976	Isoeruboside B	CC1CCC2(OC1)OC1CC3C4CC(O)C5CC(OC6OC(CO)C(OC7OC(CO)C(O)C(OC8OC(CO)C(O)C(O)C8O)C7OC7OC(CO)C(O)C(O)C7O)C(O)C6O)CCC5(C)C4CCC3(C)C1C2C	0	0	0	0	0	0	0	0	0	0	0	0	0	0	0	0	0	0	0	0	0	0	0	0	0	0	0	0	0	0	0	0	0	0	0	0	0	0	0	0	0	0	0	0	0	0	0
977	7,8-Dihydrovomifoliol 9-[rhamnosyl-(1->6)-glucoside]	CC1=CC(=O)CC(C)(C)C1(O)CCC(C)OC1OC(COC2OC(C)C(O)C(O)C2O)C(O)C(O)C1O	0	0	0	0	0	0	0	0	0	0	0	0	0	0	0	0	0	0	0	0	0	0	0	0	0	0	0	0	0	0	0	0	0	0	0	0	0	0	0	0	0	0	0	0	0	0	0
978	7,8-Dihydrovomifoliol 9-[apiosyl-(1->6)-glucoside]	CC1=CC(=O)CC(C)(C)C1(O)CCC(C)OC1OC(COC2OCC(O)(CO)C2O)C(O)C(O)C1O	0	0	0	0	0	0	0	0	0	0	0	0	0	0	0	0	0	0	0	0	0	0	0	0	0	0	0	0	0	0	0	0	0	0	0	0	0	0	0	0	0	0	0	0	0	0	0
979	6e,9e-Dihydroxy-4,7E-megastigmadien-3-one 9-glucoside	CC1=CC(=O)CC(C)(C)C1(O)C=CC(C)OC1OC(CO)C(O)C(O)C1O	0	0	0	0	0	0	0	0	0	0	0	0	0	0	0	0	0	0	0	0	0	0	0	0	0	0	0	0	0	0	0	0	0	0	0	0	0	0	0	0	0	0	0	0	0	0	0
980	6e,9e-Dihydroxy-4,7E-megastigmadien-3-one 9-[apiosyl-(1->6)-glucoside]	CC1=CC(=O)CC(C)(C)C1(O)C=CC(C)OC1OC(COC2OCC(O)(CO)C2O)C(O)C(O)C1O	0	0	0	0	0	0	0	0	0	0	0	0	0	0	0	0	0	0	0	0	0	0	0	0	0	0	0	0	0	0	0	0	0	0	0	0	0	0	0	0	0	0	0	0	0	0	0
981	7-Hydroxy-6-(methoxyacetyl)-2,2-dimethyl-2H-1-benzopyran	COCC(=O)c1cc2c(cc1O)OC(C)(C)C=C2	0	0	0	0	0	0	0	0	0	0	0	0	0	0	0	0	0	0	0	0	0	0	0	0	0	0	0	0	0	0	0	0	0	0	0	0	0	0	0	0	0	0	0	0	0	0	0
982	Vinyl caffeate	C=COC(=O)C=Cc1ccc(O)c(O)c1	0	0	0	0	0	0	0	0	0	0	0	0	0	0	0	0	0	0	0	0	0	0	0	0	0	0	0	0	0	0	0	0	0	0	0	0	0	0	0	0	0	0	0	0	0	0	0
983	Dhurrin 6'-glucoside	N#CC(OC1OC(COC2OC(CO)C(O)C(O)C2O)C(O)C(O)C1O)c1ccc(O)cc1	0	0	0	0	0	0	0	0	0	0	0	0	0	0	0	0	0	0	0	0	0	0	0	0	0	0	0	0	0	0	0	0	0	0	0	0	0	0	0	0	0	0	0	0	0	0	0
984	Cymorcin monoglucoside	Cc1c(O)cc(C(C)C)cc1OC1OC(CO)C(O)C(O)C1O	0	0	0	0	0	0	0	0	0	0	0	0	0	0	0	0	0	0	0	0	0	0	0	0	0	0	0	0	0	0	0	0	0	0	0	0	0	0	0	0	0	0	0	0	0	0	0
985	Furaneol 4-(6-malonylglucoside)	CC1=C(OC2OC(COC(=O)CC(=O)O)C(O)C(O)C2O)C(=O)C(C)O1	0	0	0	0	0	0	0	0	0	0	0	0	0	0	0	0	0	0	0	0	0	0	0	0	0	0	0	0	0	0	0	0	0	0	0	0	0	0	0	0	0	0	0	0	0	0	0
986	2-O-Protocatechuoylalphitolic acid	C=C(C)C1CCC2(C(=O)O)CCC3(C)C(CCC4C5(C)CC(OC(=O)c6ccc(O)c(O)c6)C(O)C(C)(C)C5CCC43C)C12	0	0	0	0	0	0	0	0	0	0	0	0	0	0	0	0	0	0	0	0	0	0	0	0	0	0	0	0	0	0	0	0	0	0	0	0	0	0	0	0	0	0	0	0	0	0	0
987	2alpha-Hydroxypyracrenic acid	C=C(C)C1CCC2(C(=O)O)CCC3(C)C(CCC4C5(C)CC(O)C(OC(=O)C=Cc6ccc(O)c(O)c6)C(C)(C)C5CCC43C)C12	0	0	0	0	0	0	0	0	0	0	0	0	0	0	0	0	0	0	0	0	0	0	0	0	0	0	0	0	0	0	0	0	0	0	0	0	0	0	0	0	0	0	0	0	0	0	0
988	54-Deoxyciguatoxin	CC1CC2OC3C(CC2OC2CC4OC5CC=CCC6OC7C=CC8OC9C(CC8OC7C=CC6OC5CC(O)C4(C)OC2C1)OC1CC=CC(C=CC(O)CO)OC1C9O)OC1C(C)C(C)C2(CCCO2)OC1C(O)C3C	0	0	0	0	0	0	0	0	0	0	0	0	0	0	0	0	0	0	0	0	0	0	0	0	0	0	0	0	0	0	0	0	0	0	0	0	0	0	0	0	0	0	0	0	0	0	0
989	6-Epi-7-isocucurbic acid glucoside	CCC=CCC1C(CC(=O)O)CCC1OC1OC(CO)C(O)C(O)C1O	0	0	0	0	0	0	0	0	0	0	0	0	0	0	0	0	0	0	0	0	0	0	0	0	0	0	0	0	0	0	0	0	0	0	0	0	0	0	0	0	0	0	0	0	0	0	0
990	Mono-trans-p-coumaroylmesotartaric acid	O=C(C=Cc1ccc(O)cc1)OC(C(=O)O)C(O)C(=O)O	0	0	0	0	0	0	0	0	0	0	0	0	0	0	0	0	0	0	0	0	0	0	0	0	0	0	0	0	0	0	0	0	0	0	0	0	0	0	0	0	0	0	0	0	0	0	0
991	Unshuoside A	C=CC(O)(CCC=C(C)C)COC1OC(CO)C(O)C(O)C1O	0	0	0	0	0	0	0	0	0	0	0	0	0	0	0	0	0	0	0	0	0	0	0	0	0	0	0	0	0	0	0	0	0	0	0	0	0	0	0	0	0	0	0	0	0	0	0
992	Protoisoeruboside B	CC(CCC1(O)OC2CC3C4CC(O)C5CC(OC6OC(CO)C(OC7OC(CO)C(O)C(OC8OC(CO)C(O)C(O)C8O)C7OC7OC(CO)C(O)C(O)C7O)C(O)C6O)CCC5(C)C4CCC3(C)C2C1C)COC1OC(CO)C(O)C(O)C1O	0	0	0	0	0	0	0	0	0	0	0	0	0	0	0	0	0	0	0	0	0	0	0	0	0	0	0	0	0	0	0	0	0	0	0	0	0	0	0	0	0	0	0	0	0	0	0
993	10-Oxo-11-octadecen-13-olide	CCCCCC1C=CC(=O)CCCCCCCCC(=O)O1	0	0	0	0	0	0	0	0	0	0	0	0	0	0	0	0	0	0	0	0	0	0	0	0	0	0	0	0	0	0	0	0	0	0	0	0	0	0	0	0	0	0	0	0	0	0	0
994	Kanzonol W	CC1(C)C=Cc2c(ccc3cc(-c4ccc(O)cc4O)c(=O)oc23)O1	0	0	0	0	0	0	0	0	0	0	0	0	0	0	0	0	0	0	0	0	0	0	0	0	0	0	0	0	0	0	0	0	0	0	0	0	0	0	0	0	0	0	0	0	0	0	0
995	Kanzonol V	CC(C)=CCc1cc2cc(-c3ccc(O)c4c3OC(C)(C)C=C4)oc2cc1O	0	0	0	0	0	0	0	0	0	0	0	0	0	0	0	0	0	0	0	0	0	0	0	0	0	0	0	0	0	0	0	0	0	0	0	0	0	0	0	0	0	0	0	0	0	0	0
996	Kanzonol U	CC1(C)C=Cc2c(O)ccc(-c3cc4ccc(O)cc4o3)c2O1	0	0	0	0	0	0	0	0	0	0	0	0	0	0	0	0	0	0	0	0	0	0	0	0	0	0	0	0	0	0	0	0	0	0	0	0	0	0	0	0	0	0	0	0	0	0	0
997	Viniferal	O=Cc1ccc2c(c1)C(c1cc(O)cc3c1C(c1cc(O)cc(O)c1)C(c1ccc(O)cc1)O3)C(c1ccc(O)cc1)O2	0	0	0	0	0	0	0	0	0	0	0	0	0	0	0	0	0	0	0	0	0	0	0	0	0	0	0	0	0	0	0	0	0	0	0	0	0	0	0	0	0	0	0	0	0	0	0
998	Dulciol D	C=CC(C)(C)c1cc(O)c2oc3c(ccc4ccoc43)c(=O)c2c1O	0	0	0	0	0	0	0	0	0	0	0	0	0	0	0	0	0	0	0	0	0	0	0	0	0	0	0	0	0	0	0	0	0	0	0	0	0	0	0	0	0	0	0	0	0	0	0
999	Dieporeticenin	CCCCCCCCCCC=CCCC1OC1CCC1OC1CCCCCCCCCCCCC1=CC(C)OC1=O	0	0	0	0	0	0	0	0	0	0	0	0	0	0	0	0	0	0	0	0	0	0	0	0	0	0	0	0	0	0	0	1	0	0	0	0	1	0	0	0	0	0	0	0	0	0	0
1000	Dieporeticanin	CCCCCCCCCCCCC1OC1CCC1OC1CCCCCCCCCCCCCCC1=CC(C)OC1=O	0	0	0	0	0	0	0	0	0	0	0	0	0	0	0	0	0	0	0	0	0	0	0	0	0	0	0	0	0	0	0	1	0	0	0	0	1	0	0	0	0	0	0	0	0	0	0
1001	(R)-2',4',7-Trihydroxy-3',8-diprenylisoflavan	CC(C)=CCc1c(O)ccc(C2COc3c(ccc(O)c3CC=C(C)C)C2)c1O	0	0	0	0	0	0	0	0	0	0	0	0	0	0	0	0	0	0	0	0	0	0	0	0	0	0	0	0	0	0	0	0	0	0	0	0	0	0	0	0	0	0	0	0	0	0	0
1002	Isochestanin	O=C(OCc1cc(O)c(OC2OC(CO)C(O)C(O)C2O)c(O)c1)c1cc(O)c(Oc2c(C(=O)OCc3cc(O)c(OC4OC(CO)C(O)C(O)C4O)c(O)c3)cc(O)c(O)c2O)c(O)c1	0	0	0	0	0	0	0	0	0	0	0	0	0	0	0	0	0	0	0	0	0	0	0	0	0	0	0	0	0	0	0	0	0	0	0	0	0	1	0	0	0	0	0	0	0	0	0
1003	Montecristin	CCCCCCCCCCCCC=CCCC=CCCC(O)C(O)CCCCCCCCCCC1=CC(C)OC1=O	0	0	0	0	0	0	0	0	0	0	0	0	0	0	0	0	0	0	0	0	0	0	0	0	0	0	0	0	0	0	0	1	0	0	0	0	0	0	0	0	0	0	0	0	0	0	0
1004	(Z)-13-Oxo-9-octadecenoic acid	CCCCCC(=O)CCC=CCCCCCCCC(=O)O	0	0	0	0	0	0	0	0	0	0	0	0	0	0	0	0	0	0	0	0	0	0	0	0	0	0	0	0	0	0	0	1	0	0	0	0	0	0	0	0	0	0	0	0	0	0	0
1005	(Z)-15-Oxo-11-eicosenoic acid	CCCCCC(=O)CCC=CCCCCCCCCCC(=O)O	0	0	0	0	0	0	0	0	0	0	0	0	0	0	0	0	0	0	0	0	0	0	0	0	0	0	0	0	0	0	0	1	0	0	0	0	0	0	0	0	0	0	0	0	0	0	0
1006	Diisodityrosine	NC(Cc1ccc(Oc2cc(CC(N)C(=O)O)cc(-c3cc(CC(N)C(=O)O)cc(Oc4ccc(CC(N)C(=O)O)cc4)c3O)c2O)cc1)C(=O)O	0	0	0	0	0	0	0	0	0	0	0	0	0	0	0	0	0	0	0	0	0	0	0	0	0	0	0	0	0	0	0	0	1	0	0	0	0	0	0	0	0	0	0	0	0	0	0
1007	(E)-2-Tetracosenoic acid	CCCCCCCCCCCCCCCCCCCCCC=CC(=O)O	0	0	0	0	0	0	0	0	0	0	0	0	0	0	0	0	0	0	0	0	0	0	0	0	0	0	0	0	0	0	0	1	0	0	0	0	0	0	0	0	0	0	0	0	0	0	0
1008	Mangiferic acid	CCC=CCCCCC=CCCCCCCCC(=O)O	0	0	0	0	0	0	0	0	0	0	0	0	0	0	0	0	0	0	0	0	0	0	0	0	0	0	0	0	0	0	0	1	0	0	0	0	0	0	0	0	0	0	0	0	0	0	0
1009	8-Dotriacontenoic acid	CCCCCCCCCCCCCCCCCCCCCCCC=CCCCCCCC(=O)O	0	0	0	0	0	0	0	0	0	0	0	0	0	0	0	0	0	0	0	0	0	0	0	0	0	0	0	0	0	0	0	1	0	0	0	0	0	0	0	0	0	0	0	0	0	0	0
1010	1-Cyclohexyl-11-heneicosanone	CCCCCCCCCCC(=O)CCCCCCCCCCC1CCCCC1	0	0	0	0	0	0	0	0	0	0	0	0	0	0	0	0	0	0	0	0	0	0	0	0	0	0	0	0	0	0	0	1	0	0	0	0	0	0	0	0	0	0	0	0	0	0	0
1011	Pentasine	NC(CCCC[n+]1cc(CCC(N)C(=O)O)cc(CCC(N)C(=O)O)c1C=CC(CCC(N)C(=O)O)CCC(N)C(=O)O)C(=O)O	0	0	0	0	0	0	0	0	0	0	0	0	0	0	0	0	0	0	0	0	0	0	0	0	0	0	0	0	0	0	0	0	1	0	0	0	0	0	0	0	0	0	0	0	0	0	0
1012	Momordol	CCC(CO)C(O)CC(O)C(C)CCC(C)CCCC1(C)C(CC)C(=O)C=CC1(C)O	0	0	0	0	0	0	0	0	0	0	0	0	0	0	0	0	0	0	0	0	0	0	0	0	0	0	0	0	0	0	0	0	0	0	0	0	0	0	0	0	0	0	0	0	0	0	0
1013	Eugeniflorin D2	O=C1OC2C(O)OC3COC(=O)c4cc(O)c(O)c(O)c4-c4c(cc(c(O)c4O)Oc4c(cc(O)c(O)c4O)C(=O)OC4C(O)OC5COC(=O)c6cc7c(c(O)c6-c6cc(c(O)c(O)c6O)C(=O)OC5C4OC(=O)c4cc(O)c(O)c(O)c4)OC4(O)C(O7)C1=CC(=O)C4(O)O)C(=O)OC3C2OC(=O)c1cc(O)c(O)c(O)c1	0	0	0	0	0	0	0	0	0	0	0	0	0	0	0	0	0	0	0	0	0	0	0	0	0	0	0	0	0	0	0	0	0	0	0	0	0	1	0	0	0	0	0	0	0	0	0
1014	Nicotinic acid	O=C(O)c1cccnc1	0	0	0	0	0	0	0	0	0	0	0	0	0	0	0	0	0	0	0	0	0	0	0	0	0	0	0	0	0	0	0	0	0	0	0	0	0	0	0	0	0	0	0	0	0	0	0
1015	Methyl nicotinate	COC(=O)c1cccnc1	0	0	0	0	0	0	0	0	0	0	0	0	0	0	0	0	0	0	0	0	0	0	0	0	0	0	0	0	0	0	0	0	0	0	0	0	0	0	0	0	0	0	0	0	0	0	0
1016	Ethyl nicotinate	CCOC(=O)c1cccnc1	0	0	0	0	0	0	0	0	0	0	0	0	0	0	0	0	0	0	0	0	0	0	0	0	0	0	0	0	0	0	0	0	0	0	0	0	0	0	0	0	0	0	0	0	0	0	0
1017	[Nitrilotris(methylene)]trisphosphonic acid	O=P(O)(O)CN(CP(=O)(O)O)CP(=O)(O)O	0	0	0	0	0	0	0	0	0	0	0	0	0	0	0	0	0	0	0	0	0	0	0	0	0	0	0	0	0	0	0	0	0	0	0	0	0	0	0	0	0	0	0	0	0	0	0
1018	Etidronic acid	CC(O)(P(=O)(O)O)P(=O)(O)O	0	0	0	0	0	0	0	0	0	0	0	0	0	0	0	0	0	0	0	0	0	0	0	0	0	0	0	0	0	0	0	0	0	0	0	0	0	0	0	0	0	0	0	0	0	0	0
1019	Castavinol	COc1cc(C23Oc4cc(O)cc(O)c4C(C2OC2OC(CO)C(O)C(O)C2O)C(C)(C(C)=O)O3)ccc1O	0	0	0	0	0	0	0	0	0	0	0	0	0	0	0	0	0	0	0	0	0	0	0	0	0	0	0	0	0	0	0	0	0	0	0	0	0	0	0	0	0	0	0	0	0	0	0
1020	Phytosulfokine a	CCC(C)C(N=C(O)C(N)Cc1ccc(OS(=O)(=O)O)cc1)C(O)=NC(Cc1ccc(OS(=O)(=O)O)cc1)C(O)=NC(C(O)=NC(CCC(=N)O)C(=O)O)C(C)O	0	0	0	0	0	0	0	0	0	0	0	0	0	0	0	0	0	0	0	0	0	0	0	0	0	0	0	0	0	0	0	0	0	0	0	0	0	0	0	0	0	0	0	0	0	0	0
1021	Phytosulfokine b	CCC(C)C(N=C(O)C(N)Cc1ccc(OS(=O)(=O)O)cc1)C(O)=NC(Cc1ccc(OS(=O)(=O)O)cc1)C(O)=NC(C(=O)O)C(C)O	0	0	0	0	0	0	0	0	0	0	0	0	0	0	0	0	0	0	0	0	0	0	0	0	0	0	0	0	0	0	0	0	0	0	0	0	0	0	0	0	0	0	0	0	0	0	0
1022	Ethyl hexadecanoate	CCCCCCCCCCCCCCCC(=O)OCC	0	0	0	0	0	0	0	0	0	0	0	0	0	0	0	0	0	0	0	0	0	0	0	0	0	0	0	0	0	0	0	1	0	0	0	0	0	0	0	0	0	0	0	0	0	0	0
1023	Quercetin 8-C-(2''-rhamnosylglucoside)	CC1OC(OC2C(c3c(O)cc(O)c4c(=O)c(O)c(-c5ccc(O)c(O)c5)oc34)OC(CO)C(O)C2O)C(O)C(O)C1O	0	0	0	0	0	0	0	0	0	0	0	0	0	0	0	0	0	0	0	0	0	0	0	0	0	0	0	0	0	0	0	0	0	0	0	0	0	0	0	0	0	0	0	0	0	0	0
1024	5'-Hydroxycastavinol	COc1cc(C23Oc4cc(O)cc(O)c4C(C2OC2OC(CO)C(O)C(O)C2O)C(C)(C(C)=O)O3)cc(O)c1O	0	0	0	0	0	0	0	0	0	0	0	0	0	0	0	0	0	0	0	0	0	0	0	0	0	0	0	0	0	0	0	0	0	0	0	0	0	0	0	0	0	0	0	0	0	0	0
1025	5'-Methoxycastavinol	COc1cc(C23Oc4cc(O)cc(O)c4C(C2OC2OC(CO)C(O)C(O)C2O)C(C)(C(C)=O)O3)cc(OC)c1O	0	0	0	0	0	0	0	0	0	0	0	0	0	0	0	0	0	0	0	0	0	0	0	0	0	0	0	0	0	0	0	0	0	0	0	0	0	0	0	0	0	0	0	0	0	0	0
1026	Doristerol	CC(C)CCCC(C)C1CCC2=C3CCC4CC(O)CCC4(C)C3CCC21C	0	0	0	0	0	0	0	0	0	0	0	0	0	0	0	0	0	0	0	0	0	0	0	0	0	0	0	0	0	0	0	0	0	0	0	0	0	0	0	0	0	0	0	0	0	0	0
1027	Cardanoldiene	CCCC=CCC=CCCCCCCCc1cccc(O)c1	0	0	0	0	0	0	0	0	0	0	0	0	0	0	0	0	0	0	0	0	0	0	0	0	0	0	0	0	0	0	0	1	0	0	0	0	0	0	0	0	0	0	0	0	0	0	0
1028	Ethyl salicylate	CCOC(=O)c1ccccc1O	0	0	0	0	0	0	0	0	0	0	0	0	0	0	0	0	0	0	0	0	0	0	0	0	0	0	0	0	0	0	0	0	0	0	0	0	0	0	0	0	0	0	0	0	0	0	0
1029	Benzyl salicylate	O=C(OCc1ccccc1)c1ccccc1O	0	0	0	0	0	0	0	0	0	0	0	0	0	0	0	0	0	0	0	0	0	0	0	0	0	0	0	0	0	0	0	0	0	0	0	0	0	0	0	0	0	0	0	0	0	0	0
1030	2-Phenylethyl beta-D-glucopyranoside	OCC1OC(OCCc2ccccc2)C(O)C(O)C1O	0	0	0	0	0	0	0	0	0	0	0	0	0	0	0	0	0	0	0	0	0	0	0	0	0	0	0	0	0	0	0	0	0	0	0	0	0	0	0	0	0	0	0	0	0	0	0
1031	2,6-Diisopropyl-3-methylphenol	Cc1ccc(C(C)C)c(O)c1C(C)C	0	0	0	0	0	0	0	0	0	0	0	0	0	0	0	0	0	0	0	0	0	0	0	0	0	0	0	0	0	0	0	0	0	0	0	0	0	0	0	0	0	0	0	0	0	0	0
1032	2,5-Diisopropyl-4-methylphenol	Cc1cc(C(C)C)c(O)cc1C(C)C	0	0	0	0	0	0	0	0	0	0	0	0	0	0	0	0	0	0	0	0	0	0	0	0	0	0	0	0	0	0	0	0	0	0	0	0	0	0	0	0	0	0	0	0	0	0	0
1033	2,5-Diisopropyl-3-methylphenol	Cc1cc(C(C)C)cc(O)c1C(C)C	0	0	0	0	0	0	0	0	0	0	0	0	0	0	0	0	0	0	0	0	0	0	0	0	0	0	0	0	0	0	0	0	0	0	0	0	0	0	0	0	0	0	0	0	0	0	0
1034	2,4-Diisopropyl-5-methylphenol	Cc1cc(O)c(C(C)C)cc1C(C)C	0	0	0	0	0	0	0	0	0	0	0	0	0	0	0	0	0	0	0	0	0	0	0	0	0	0	0	0	0	0	0	0	0	0	0	0	0	0	0	0	0	0	0	0	0	0	0
1035	2,4-Diisopropyl-3-methylphenol	Cc1c(C(C)C)ccc(O)c1C(C)C	0	0	0	0	0	0	0	0	0	0	0	0	0	0	0	0	0	0	0	0	0	0	0	0	0	0	0	0	0	0	0	0	0	0	0	0	0	0	0	0	0	0	0	0	0	0	0
1036	2,3-Diisopropyl-5-methylphenol	Cc1cc(O)c(C(C)C)c(C(C)C)c1	0	0	0	0	0	0	0	0	0	0	0	0	0	0	0	0	0	0	0	0	0	0	0	0	0	0	0	0	0	0	0	0	0	0	0	0	0	0	0	0	0	0	0	0	0	0	0
1037	4-Aminobenzoic acid	Nc1ccc(C(=O)O)cc1	0	0	0	0	0	0	0	0	0	0	0	0	0	0	0	0	0	0	0	0	0	0	0	0	0	0	0	0	0	0	0	0	0	0	0	0	0	0	0	0	0	0	0	0	0	0	0
1038	Hallacridone	CC(=O)c1cc2c(cc(O)c3c(=O)c4ccccc4n(C)c32)o1	0	0	0	0	0	0	0	0	0	0	0	0	0	0	0	0	0	0	0	0	0	0	0	0	0	0	0	0	0	0	0	0	0	0	0	0	0	0	0	0	0	0	0	0	0	0	0
1039	Junosidine	COc1cccc2c(=O)c3c(O)c4c(cc3n(C)c12)OC(C)(C)C=C4	0	0	0	0	0	0	0	0	0	0	0	0	0	0	0	0	0	0	0	0	0	0	0	0	0	0	0	0	0	0	0	0	0	0	0	0	0	0	0	0	0	0	0	0	0	0	0
1040	Dihydrodioscorine	CC1CC(=O)OC2(C1)CC1CCC2CN1C	0	0	0	0	0	0	0	0	0	0	0	0	0	0	0	0	0	0	0	0	0	0	0	0	0	0	0	0	0	0	0	0	0	0	0	0	0	0	0	0	0	0	0	0	0	0	0
1043	Norchalciporyl propionate	CCC(=O)OCCC=CC=CC1=NC(C)C=CC=C1	0	0	0	0	0	0	0	0	0	0	0	0	0	0	0	0	0	0	0	0	0	0	0	0	0	0	0	0	0	0	0	0	0	0	0	0	0	0	0	0	0	0	0	0	0	0	0
1044	L-Malic acid	O=C(O)CC(O)C(=O)O	0	0	0	0	0	0	0	0	0	0	0	0	0	0	0	0	0	0	0	0	0	0	0	0	0	0	0	0	0	0	0	0	0	0	0	0	0	0	0	0	0	0	0	0	0	0	0
1045	N-Caffeoyltryptophan	O=C(C=Cc1ccc(O)c(O)c1)NC(Cc1c[nH]c2ccccc12)C(=O)O	0	0	0	0	0	0	0	0	0	0	0	0	0	0	0	0	0	0	0	0	0	0	0	0	0	0	0	0	0	0	0	0	0	0	0	0	0	0	0	0	0	0	0	0	0	0	0
1046	Ractopamine hydrochloride	CC(CCc1ccc(O)cc1)NCC(O)c1ccc(O)cc1.Cl	0	0	0	0	0	0	0	0	0	0	0	0	0	0	0	0	0	0	0	0	0	0	0	0	0	0	0	0	0	0	0	0	0	0	0	0	0	0	0	0	0	0	0	0	0	0	0
1047	8-Carboxymethyldihydrochelerythrine	COc1ccc2c(c1OC)C(CC(=O)O)N(C)c1c-2ccc2cc3c(cc12)OCO3	0	0	0	0	0	0	0	0	0	0	0	0	0	0	0	0	0	0	0	0	0	0	0	0	0	0	0	0	0	0	0	0	0	0	0	0	0	0	0	0	0	0	0	0	0	0	0
1048	Cyclodopa glucoside	O=C(O)C1Cc2cc(OC3OC(CO)C(O)C(O)C3O)c(O)cc2N1	0	0	0	0	0	0	0	0	0	0	0	0	0	0	0	0	0	0	0	0	0	0	0	0	0	0	0	0	0	0	0	0	0	0	0	0	0	0	0	0	0	0	0	0	0	0	0
1049	Harmalan	CC1=NCCc2c1[nH]c1ccccc21	0	0	0	0	0	0	0	0	0	0	0	0	0	0	0	0	0	0	0	0	0	0	0	0	0	0	0	0	0	0	0	0	0	0	0	0	0	0	0	0	0	0	0	0	0	0	0
1050	Tetrahydroharmol	CC1NCCc2c1[nH]c1cc(O)ccc21	0	0	0	0	0	0	0	0	0	0	0	0	0	0	0	0	0	0	0	0	0	0	0	0	0	0	0	0	0	0	0	0	0	0	0	0	0	0	0	0	0	0	0	0	0	0	0
1051	1,2,3,4-Tetrahydro-2-methyl-b-carboline	CN1CCc2c([nH]c3ccccc23)C1	0	0	0	0	0	0	0	0	0	0	0	0	0	0	0	0	0	0	0	0	0	0	0	0	0	0	0	0	0	0	0	0	0	0	0	0	0	0	0	0	0	0	0	0	0	0	0
1052	Nb-Acetyl-Nb-methyltryptamine	CC(=O)N(C)CCc1c[nH]c2ccccc12	0	0	0	0	0	0	0	0	0	0	0	0	0	0	0	0	0	0	0	0	0	0	0	0	0	0	0	0	0	0	0	0	0	0	0	0	0	0	0	0	0	0	0	0	0	0	0
1053	Harmalol	CC1=NCCc2c1[nH]c1cc(O)ccc21	0	0	0	0	0	0	0	0	0	0	0	0	0	0	0	0	0	0	0	0	0	0	0	0	0	0	0	0	0	0	0	0	0	0	0	0	0	0	0	0	0	0	0	0	0	0	0
1054	Ascorbigen	O=C1OC2C(O)COC2(O)C1(O)Cc1c[nH]c2ccccc12	0	0	0	0	0	0	0	0	0	0	0	0	0	0	0	0	0	0	0	0	0	0	0	0	0	0	0	0	0	0	0	0	0	0	0	0	0	0	0	0	0	0	0	0	0	0	0
1055	Vulgaxanthin I	NC(=O)CCC(N=CC=C1C=C(C(=O)O)NC(C(=O)O)C1)C(=O)O	0	0	0	0	0	0	0	0	0	0	0	0	0	0	0	0	0	0	0	0	0	0	0	0	0	0	0	0	0	0	0	0	0	0	0	0	0	0	0	0	0	0	0	0	0	0	0
1056	Vulgaxanthin II	O=C(O)CCC(N=CC=C1C=C(C(=O)O)NC(C(=O)O)C1)C(=O)O	0	0	0	0	0	0	0	0	0	0	0	0	0	0	0	0	0	0	0	0	0	0	0	0	0	0	0	0	0	0	0	0	1	0	0	0	0	0	0	0	0	0	0	0	0	0	0
1057	Betalamic acid	O=CC=C1C=C(C(=O)O)NC(C(=O)O)C1	0	0	0	0	0	0	0	0	0	0	0	0	0	0	0	0	0	0	0	0	0	0	0	0	0	0	0	0	0	0	0	0	0	0	0	0	0	0	0	0	0	0	0	0	0	0	0
1060	Glycyrrhizin	CC1(C(=O)O)CCC2(C)CCC3(C)C(=CC(=O)C4C5(C)CCC(OC6OC(C(=O)O)C(O)C(O)C6OC6OC(C(=O)O)C(O)C(O)C6O)C(C)(C)C5CCC43C)C2C1	0	0	0	0	0	0	0	0	0	0	0	0	0	0	0	0	0	0	0	0	0	0	0	0	0	0	0	0	0	0	0	0	0	0	0	0	0	0	0	0	0	0	0	0	0	0	0
1061	Glyciram	CC1(C(=O)O)CCC2(C)CCC3(C)C(=CC(=O)C4C5(C)CCC(OC6OC(C(=O)O)C(O)C(O)C6OC6OC(C(=O)O)C(O)C(O)C6O)C(C)(C)C5CCC43C)C2C1.[NH4+]	0	0	0	0	0	0	0	0	0	0	0	0	0	0	0	0	0	0	0	0	0	0	0	0	0	0	0	0	0	0	0	0	0	0	0	0	0	0	0	0	0	0	0	0	0	0	0
1062	Cellulase	CCOP(=S)(OCC)SCSC(C)(C)C	0	0	0	0	0	0	0	0	0	0	0	0	0	0	0	0	0	0	0	0	0	0	0	0	0	0	0	0	0	0	0	0	0	0	0	0	0	0	0	0	0	0	0	0	0	0	0
1063	Chymopapain	O=S(=O)([O-])c1cc(O)c(O)c(S(=O)(=O)[O-])c1.[Na+].[Na+]	0	0	0	0	0	0	0	0	0	0	0	0	0	0	0	0	0	0	0	0	0	0	0	0	0	0	0	0	0	0	0	0	0	0	0	0	0	0	0	0	0	0	0	0	0	0	0
1064	Papain	CC(C)Cc1ccc(C(C)C(=O)O)cc1	0	0	0	0	0	0	0	0	0	0	0	0	0	0	0	0	0	0	0	0	0	0	0	0	0	0	0	0	0	0	0	0	0	0	0	0	0	0	0	0	0	0	0	0	0	0	0
1065	Maxepa	CCCCCc1cc(O)c2c(c1)OC(C)(C)C1CCC(C)=CC21	0	0	0	0	0	0	0	0	0	0	0	0	0	0	0	0	0	0	0	0	0	0	0	0	0	0	0	0	0	0	0	0	0	0	0	0	0	0	0	0	0	0	0	0	0	0	0
1066	Nonivamide	CCCCCCCCC(=O)NCc1ccc(O)c(OC)c1	0	0	0	0	0	0	0	0	0	0	0	0	0	0	0	0	0	0	0	0	0	0	0	0	0	0	0	0	0	0	0	1	0	0	0	0	0	0	0	0	0	0	0	0	0	0	0
1067	7,7',8,8'-Tetrahydro-beta,beta-carotene	CC(C=CC=C(C)CCC1=C(C)CCCC1(C)C)=CC=CC=C(C)C=CC=C(C)CCC1=C(C)CCCC1(C)C	0	0	0	0	0	0	0	0	0	0	0	0	0	0	0	0	0	0	0	0	0	0	0	0	0	0	0	0	0	0	0	0	0	0	0	0	0	0	0	0	0	0	0	0	0	0	0
1068	(-)-trans-Carveol glucoside	C=C(C)C1CC=C(C)C(OC2OC(CO)C(O)C(O)C2O)C1	0	0	0	0	0	0	0	0	0	0	0	0	0	0	0	0	0	0	0	0	0	0	0	0	0	0	0	0	0	0	0	0	0	0	0	0	0	0	0	0	0	0	0	0	0	0	0
1069	(+)-trans-Carveol glucoside	C=C(C)C1CC=C(C)C(OC2OC(CO)C(O)C(O)C2O)C1	0	0	0	0	0	0	0	0	0	0	0	0	0	0	0	0	0	0	0	0	0	0	0	0	0	0	0	0	0	0	0	0	0	0	0	0	0	0	0	0	0	0	0	0	0	0	0
1070	D-Citronellol glucoside	CC(C)=CCCC(C)CCOC1OC(CO)C(O)C(O)C1O	0	0	0	0	0	0	0	0	0	0	0	0	0	0	0	0	0	0	0	0	0	0	0	0	0	0	0	0	0	0	0	0	0	0	0	0	0	0	0	0	0	0	0	0	0	0	0
1071	L-Citronellol glucoside	CC(C)=CCCC(C)CCOC1OC(CO)C(O)C(O)C1O	0	0	0	0	0	0	0	0	0	0	0	0	0	0	0	0	0	0	0	0	0	0	0	0	0	0	0	0	0	0	0	0	0	0	0	0	0	0	0	0	0	0	0	0	0	0	0
1072	27-Deoxy-5alpha-cyprinol	CC(CO)CCCC(C)C1CCC2C3C(O)CC4CC(O)CCC4(C)C3CC(O)C12C	0	0	0	0	0	0	0	0	0	0	0	0	0	0	0	0	0	0	0	0	0	0	0	0	0	0	0	0	0	0	0	0	0	0	0	0	0	0	0	0	0	0	0	0	0	0	0
1073	Methylgingerol	CCCCCC(O)CC(=O)CCc1ccc(OC)c(OC)c1	0	0	0	0	0	0	0	0	0	0	0	0	0	0	0	0	0	0	0	0	0	0	0	0	0	0	0	0	0	0	0	0	0	0	0	0	0	0	0	0	0	0	0	0	0	0	0
1074	1,2-Epoxy-1,2,7,7',8,8',11,12-octahydro-psi,psi-carotene	CC(C)=CCCC(C)=CCCC(C)=CCCC(C)=CC=CC=C(C)C=CC=C(C)CCC=C(C)CCC1OC1(C)C	0	0	0	0	0	0	0	0	0	0	0	0	0	0	0	0	0	0	0	0	0	0	0	0	0	0	0	0	0	0	0	0	0	0	0	0	1	0	0	0	0	0	0	0	0	0	0
1075	1,2-Epoxy-1,2,7,7',8,8',11',12'-octahydro-psi,psi-carotene	CC(C=CC=C(C)CCC=C(C)CCCC(C)C)=CC=CC=C(C)CCC=C(C)CCC=C(C)CCC1OC1(C)C	0	0	0	0	0	0	0	0	0	0	0	0	0	0	0	0	0	0	0	0	0	0	0	0	0	0	0	0	0	0	0	0	0	0	0	0	1	0	0	0	0	0	0	0	0	0	0
1076	Cochineal Red A	O=S(=O)(O)c1cc(S(=O)(=O)O)c2c(N=Nc3ccc(S(=O)(=O)O)c4ccccc34)c(O)ccc2c1	0	0	0	0	0	0	0	0	0	0	0	0	0	0	0	0	0	0	0	0	0	0	0	0	0	0	0	0	0	0	0	0	0	0	0	0	0	0	0	0	0	0	0	0	0	0	0
1077	(R)-alpha-Terpinyl glucoside	CC1=CCC(C(C)(C)OC2OC(CO)C(O)C(O)C2O)CC1	0	0	0	0	0	0	0	0	0	0	0	0	0	0	0	0	0	0	0	0	0	0	0	0	0	0	0	0	0	0	0	0	0	0	0	0	0	0	0	0	0	0	0	0	0	0	0
1078	(S)-alpha-Terpinyl glucoside	CC1=CCC(C(C)(C)OC2OC(CO)C(O)C(O)C2O)CC1	0	0	0	0	0	0	0	0	0	0	0	0	0	0	0	0	0	0	0	0	0	0	0	0	0	0	0	0	0	0	0	0	0	0	0	0	0	0	0	0	0	0	0	0	0	0	0
1079	Cryptochrome	CC(C=CC=C(C)C1C=C2C(C)(C)CCCC2(C)O1)=CC=CC=C(C)C=CC=C(C)C1C=C2C(C)(C)CC(O)CC2(C)O1	0	0	0	0	0	0	0	0	0	0	0	0	0	0	0	0	0	0	0	0	0	0	0	0	0	0	0	0	0	0	0	0	0	0	0	0	0	0	0	0	0	0	0	0	0	0	0
1080	Lansimide 3	COC(c1ccccc1)C1C(c2ccccc2)C(O)C(=O)N1C	0	0	0	0	0	0	0	0	0	0	0	0	0	0	0	0	0	0	0	0	0	0	0	0	0	0	0	0	0	0	0	0	0	0	0	0	0	0	0	0	0	0	0	0	0	0	0
1081	Methyl (xi)-3-nonenoate	CCCCCC=CCC(=O)OC	0	0	0	0	0	0	0	0	0	0	0	0	0	0	0	0	0	0	0	0	0	0	0	0	0	0	0	0	0	0	0	0	0	0	0	0	0	0	0	0	0	0	0	0	0	0	0
1083	Bromelains	CCCC(C)C1(CC)C([O-])=NC(=O)N=C1O.[Na+]	0	0	0	0	0	0	0	0	0	0	0	0	0	0	0	0	0	0	0	0	0	0	0	0	0	0	0	0	0	0	0	0	0	0	0	0	0	0	0	0	0	0	0	0	0	0	0
1084	Pancreatin	CC(C=CC1=C(C)CCCC1(C)C)=CC=CC(C)=CC(=O)O	0	0	0	0	0	0	0	0	0	0	0	0	0	0	0	0	0	0	0	0	0	0	0	0	0	0	0	0	0	0	0	0	0	0	0	0	0	0	0	0	0	0	0	0	0	0	0
1086	Enrofloxacin	CCN1CCN(c2cc3c(cc2F)c(=O)c(C(=O)O)cn3C2CC2)CC1	0	0	0	0	0	0	0	0	0	0	0	0	0	0	0	0	0	0	0	0	0	0	0	0	0	0	0	0	0	0	0	0	0	0	0	0	0	0	0	0	0	0	0	0	0	0	0
1087	Palmidrol	CCCCCCCCCCCCCCCC(=O)NCCO	0	0	0	0	0	0	0	0	0	0	0	0	0	0	0	0	0	0	0	0	0	0	0	0	0	0	0	0	0	0	0	1	0	0	0	0	0	0	0	0	0	0	0	0	0	0	0
1088	(E)-2-Octenoic acid	CCCCCC=CC(=O)O	0	0	0	0	0	0	0	0	0	0	0	0	0	0	0	0	0	0	0	0	0	0	0	0	0	0	0	0	0	0	0	0	0	0	0	0	0	0	0	0	0	0	0	0	0	0	0
1089	(S)-N-Acetylmethionine	CSCCC(NC(C)=O)C(=O)O	0	0	0	0	0	0	0	0	0	0	0	0	0	0	0	0	0	0	0	0	0	0	0	0	0	0	0	0	0	0	0	0	0	0	0	0	0	0	0	0	0	0	0	0	0	0	0
1091	Cyromazine	Nc1nc(N)nc(NC2CC2)n1	0	0	0	0	0	0	0	0	0	0	0	0	0	0	0	0	0	0	0	0	0	0	0	0	0	0	0	0	0	0	0	0	0	0	0	0	0	0	0	0	0	0	0	0	0	0	0
1092	(3beta,22E)-26,27-Dinorergosta-5,22-dien-3-ol	CC(C)C=CC(C)C1CCC2C3CC=C4CC(O)CCC4(C)C3CCC12C	0	0	0	0	0	0	0	0	0	0	0	0	0	0	0	0	0	0	0	0	0	0	0	0	0	0	0	0	0	0	0	0	0	0	0	0	0	0	0	0	0	0	0	0	0	0	0
1093	2-Amino-3,8-dimethyl-3H-imidazo[4,5-f]quinoxaline	Cc1cnc2ccc3c(nc(N)n3C)c2n1	0	0	0	0	0	0	0	0	0	0	0	0	0	0	0	0	0	0	0	0	0	0	0	0	0	0	0	0	0	0	0	0	0	0	0	0	0	0	0	0	0	0	0	0	0	0	0
1094	Umbelliferone	O=c1ccc2ccc(O)cc2o1	0	0	0	0	0	0	0	0	0	0	0	0	0	0	0	0	0	0	0	0	0	0	0	0	0	0	0	0	0	0	0	0	0	0	0	0	0	0	0	0	0	0	0	0	0	0	0
1095	3'-Prenylnaringenin	CC(C)=CCc1cc(C2CC(=O)c3c(O)cc(O)cc3O2)ccc1O	0	0	0	0	0	0	0	0	0	0	0	0	0	0	0	0	0	0	0	0	0	0	0	0	0	0	0	0	0	0	0	0	0	0	0	0	0	0	0	0	0	0	0	0	0	0	0
1096	Isoelemicin	CC=Cc1cc(OC)c(OC)c(OC)c1	0	0	0	0	0	0	0	0	0	0	0	0	0	0	0	0	0	0	0	0	0	0	0	0	0	0	0	0	0	0	0	0	0	0	0	0	0	0	0	0	0	0	0	0	0	0	0
1097	Mangostanol	COc1c(O)cc2oc3cc4c(c(O)c3c(=O)c2c1CC=C(C)C)CC(O)C(C)(C)O4	0	0	0	0	0	0	0	0	0	0	0	0	0	0	0	0	0	0	0	0	0	0	0	0	0	0	0	0	0	0	0	0	0	0	0	0	0	0	0	0	0	0	0	0	0	0	0
1098	Hemiariensin	CC(=O)OCC(Cc1ccc2c(c1)OCO2)C(CO)Cc1ccc2c(c1)OCO2	0	0	0	0	0	0	0	0	0	0	0	0	0	0	0	0	0	0	0	0	0	0	0	0	0	0	0	0	0	0	0	0	0	0	0	0	0	0	0	0	0	0	0	0	0	0	0
1099	3'-Hydroxydihydroformononetin	COc1ccc(C2COc3cc(O)ccc3C2=O)cc1O	0	0	0	0	0	0	0	0	0	0	0	0	0	0	0	0	0	0	0	0	0	0	0	0	0	0	0	0	0	0	0	0	0	0	0	0	0	0	0	0	0	0	0	0	0	0	0
1100	Sanguiin H4	O=C(OC1OC(CO)C(O)C2OC(=O)c3cc(O)c(O)c(O)c3-c3c(cc(O)c(O)c3O)C(=O)OC12)c1cc(O)c(O)c(O)c1	0	0	0	0	0	0	0	0	0	0	0	0	0	0	0	0	0	0	0	0	0	0	0	0	0	0	0	0	0	0	0	0	0	0	0	0	0	1	0	0	0	0	0	0	0	0	0
1101	gamma-Asarone	C=CCc1cc(OC)c(OC)cc1OC	0	0	0	0	0	0	0	0	0	0	0	0	0	0	0	0	0	0	0	0	0	0	0	0	0	0	0	0	0	0	0	0	0	0	0	0	0	0	0	0	0	0	0	0	0	0	0
1102	(S)-Spinacine	O=C(O)C1Cc2[nH]cnc2CN1	0	0	0	0	0	0	0	0	0	0	0	0	0	0	0	0	0	0	0	0	0	0	0	0	0	0	0	0	0	0	0	0	0	0	0	0	0	0	0	0	0	0	0	0	0	0	0
1103	Squamolone	NC(=O)N1CCCC1=O	0	0	0	0	0	0	0	0	0	0	0	0	0	0	0	0	0	0	0	0	0	0	0	0	0	0	0	0	0	0	0	0	0	0	0	0	0	0	0	0	0	0	0	0	0	0	0
1104	Tigloidine	CC=C(C)C(=O)OC1CC2CCC(C1)N2C	0	0	0	0	0	0	0	0	0	0	0	0	0	0	0	0	0	0	0	0	0	0	0	0	0	0	0	0	0	0	0	0	0	0	0	0	0	0	0	0	0	0	0	0	0	0	0
1105	Paucine	NCCCCN=C(O)C=Cc1ccc(O)c(O)c1	0	0	0	0	0	0	0	0	0	0	0	0	0	0	0	0	0	0	0	0	0	0	0	0	0	0	0	0	0	0	0	0	0	0	0	0	0	0	0	0	0	0	0	0	0	0	0
1106	Pancrelipase	O=C([O-])C1C2CCC(O2)C1C(=O)[O-].[Na+].[Na+]	0	0	0	0	0	0	0	0	0	0	0	0	0	0	0	0	0	0	0	0	0	0	0	0	0	0	0	0	0	0	0	0	0	0	0	0	0	0	0	0	0	0	0	0	0	0	0
1107	Myricetin 3-(3'',4''-diacetylrhamnoside)	CC(=O)OC1C(C)OC(Oc2c(-c3cc(O)c(O)c(O)c3)oc3cc(O)cc(O)c3c2=O)C(O)C1OC(C)=O	0	0	0	0	0	0	0	0	0	0	0	0	0	0	0	0	0	0	0	0	0	0	0	0	0	0	0	0	0	0	0	0	0	0	0	0	0	1	0	0	0	0	0	0	0	0	0
1108	(S)-[6]-Gingerol	CCCCCC(O)CC(=O)CCc1ccc(O)c(OC)c1	0	0	0	0	0	0	0	0	0	0	0	0	0	0	0	0	0	0	0	0	0	0	0	0	0	0	0	0	0	0	0	0	0	0	0	0	0	0	0	0	0	0	0	0	0	0	0
1109	D-Tagatose	O=C(CO)C(O)C(O)C(O)CO.OCC1(O)OCC(O)C(O)C1O.OCC1OC(O)(CO)C(O)C1O	0	0	0	0	0	0	0	0	0	0	0	0	0	0	0	0	0	0	0	0	0	0	0	0	0	0	0	0	0	0	0	0	0	0	0	0	0	0	0	0	0	0	0	0	0	0	0
1110	D-Tartaric acid	O=C(O)C(O)C(O)C(=O)O	0	0	0	0	0	0	0	0	0	0	0	0	0	0	0	0	0	0	0	0	0	0	0	0	0	0	0	0	0	0	0	0	0	0	0	0	0	0	0	0	0	0	0	0	0	0	0
1111	Chinese tannin	O=C(OCC1OC(OC(=O)c2cc(O)c(O)c(OC(=O)c3cc(O)c(O)c(O)c3)c2)C(OC(=O)c2cc(O)c(O)c(OC(=O)c3cc(O)c(O)c(O)c3)c2)C(OC(=O)c2cc(O)c(O)c(OC(=O)c3cc(O)c(O)c(O)c3)c2)C1OC(=O)c1cc(O)c(O)c(OC(=O)c2cc(O)c(O)c(O)c2)c1)c1cc(O)c(O)c(OC(=O)c2cc(O)c(O)c(O)c2)c1	0	0	0	0	0	0	0	0	0	0	0	0	0	0	0	0	0	0	0	0	0	0	0	0	0	0	0	0	0	0	0	0	0	0	0	0	0	1	0	0	0	0	0	0	0	0	0
1112	Tartaric acid	O=C(O)C(O)C(O)C(=O)O	0	0	0	0	0	0	0	0	0	0	0	0	0	0	0	0	0	0	0	0	0	0	0	0	0	0	0	0	0	0	0	0	0	0	0	0	0	0	0	0	0	0	0	0	0	0	0
1113	L-Tartaric acid	O=C(O)C(O)C(O)C(=O)O	0	0	0	0	0	0	0	0	0	0	0	0	0	0	0	0	0	0	0	0	0	0	0	0	0	0	0	0	0	0	0	0	0	0	0	0	0	0	0	0	0	0	0	0	0	0	0
1114	alpha,alpha-Trehalose	OCC1OC(OC2OC(CO)C(O)C(O)C2O)C(O)C(O)C1O	0	0	0	0	0	0	0	0	0	0	0	0	0	0	0	0	0	0	0	0	0	0	0	0	0	0	0	0	0	0	0	0	0	0	0	0	0	0	0	0	0	0	0	0	0	0	0
1115	Neotrehalose	OCC1OC(OC2OC(CO)C(O)C(O)C2O)C(O)C(O)C1O	0	0	0	0	0	0	0	0	0	0	0	0	0	0	0	0	0	0	0	0	0	0	0	0	0	0	0	0	0	0	0	0	0	0	0	0	0	0	0	0	0	0	0	0	0	0	0
1116	D-Glucaric acid	O=C(O)C(O)C(O)C(O)C(O)C(=O)O	0	0	0	0	0	0	0	0	0	0	0	0	0	0	0	0	0	0	0	0	0	0	0	0	0	0	0	0	0	0	0	0	0	0	0	0	0	0	0	0	0	0	0	0	0	0	0
1117	Sakebiose	O=CC(O)C(OC1OC(CO)C(O)C(O)C1O)C(O)C(O)CO.OCC(O)C1OC(O)C(O)C1OC1OC(CO)C(O)C(O)C1O.OCC1OC(OC2C(O)C(O)OC(CO)C2O)C(O)C(O)C1O	0	0	0	0	0	0	0	0	0	0	0	0	0	0	0	0	0	0	0	0	0	0	0	0	0	0	0	0	0	0	0	0	0	0	0	0	0	0	0	0	0	0	0	0	0	0	0
1118	Sambubiose	OCC1OC(O)C(OC2OCC(O)C(O)C2O)C(O)C1O	0	0	0	0	0	0	0	0	0	0	0	0	0	0	0	0	0	0	0	0	0	0	0	0	0	0	0	0	0	0	0	0	0	0	0	0	0	0	0	0	0	0	0	0	0	0	0
1119	2-C-Methyl-1,4-erythrono-D-lactone	CC1(O)C(=O)OCC1O	0	0	0	0	0	0	0	0	0	0	0	0	0	0	0	0	0	0	0	0	0	0	0	0	0	0	0	0	0	0	0	0	0	0	0	0	0	0	0	0	0	0	0	0	0	0	0
1120	Sorbitan laurate	CCCCCCCCCCCC(=O)OCC(O)C1OCC(O)C1O	0	0	0	0	0	0	0	0	0	0	0	0	0	0	0	0	0	0	0	0	0	0	0	0	0	0	0	0	0	0	0	1	0	0	0	0	0	0	0	0	0	0	0	0	0	0	0
1121	Sorbitan oleate	CCCCCCCCC=CCCCCCCCC(=O)OCC(O)C1OCC(O)C1O	0	0	0	0	0	0	0	0	0	0	0	0	0	0	0	0	0	0	0	0	0	0	0	0	0	0	0	0	0	0	0	1	0	0	0	0	0	0	0	0	0	0	0	0	0	0	0
1122	Sorbitan palmitate	CCCCCCCCCCCCCCCC(=O)OCC(O)C1OCC(O)C1O	0	0	0	0	0	0	0	0	0	0	0	0	0	0	0	0	0	0	0	0	0	0	0	0	0	0	0	0	0	0	0	1	0	0	0	0	0	0	0	0	0	0	0	0	0	0	0
1123	Sorbitan stearate	CCCCCCCCCCCCCCCCCC(=O)OCC(O)C1OCC(O)C1O	0	0	0	0	0	0	0	0	0	0	0	0	0	0	0	0	0	0	0	0	0	0	0	0	0	0	0	0	0	0	0	1	0	0	0	0	0	0	0	0	0	0	0	0	0	0	0
1124	Sorbitan trioleate	CCCCCCCCC=CCCCCCCCC(=O)OCC(OC(=O)CCCCCCCC=CCCCCCCCC)C1OCC(O)C1OC(=O)CCCCCCCC=CCCCCCCCC	0	0	0	0	0	0	0	0	0	0	0	0	0	0	0	0	0	0	0	0	0	0	0	0	0	0	0	0	0	0	0	1	0	0	0	0	0	0	0	0	0	0	0	0	0	0	0
1125	Sorbitan tristearate	CCCCCCCCCCCCCCCCCC(=O)OCC(OC(=O)CCCCCCCCCCCCCCCCC)C1OCC(O)C1OC(=O)CCCCCCCCCCCCCCCCC	0	0	0	0	0	0	0	0	0	0	0	0	0	0	0	0	0	0	0	0	0	0	0	0	0	0	0	0	0	0	0	1	0	0	0	0	0	0	0	0	0	0	0	0	0	0	0
1126	L-Sorbose	O=C(CO)C(O)C(O)C(O)CO.OCC1(O)OCC(O)C(O)C1O.OCC1OC(O)(CO)C(O)C1O	0	0	0	0	0	0	0	0	0	0	0	0	0	0	0	0	0	0	0	0	0	0	0	0	0	0	0	0	0	0	0	0	0	0	0	0	0	0	0	0	0	0	0	0	0	0	0
1127	Starch acetate	CC(=O)OCC1OC(O)C(OC(C)=O)C(OC(C)=O)C1O	0	0	0	0	0	0	0	0	0	0	0	0	0	0	0	0	0	0	0	0	0	0	0	0	0	0	0	0	0	0	0	0	0	0	0	0	0	0	0	0	0	0	0	0	0	0	0
1128	Starch	OCC1OC(O)C(O)C(O)C1O	0	0	0	0	0	0	0	0	0	0	0	0	0	0	0	0	0	0	0	0	0	0	0	0	0	0	0	0	0	0	0	0	0	0	0	0	0	0	0	0	0	0	0	0	0	0	0
1129	Asiaticoside B	CC1OC(OC2C(CO)OC(OCC3OC(OC(=O)C45CCC(C)(C)CC4C4=CCC6C7(C)CC(O)C(O)C(C)(CO)C7C(O)CC6(C)C4(C)CC5)C(O)C(O)C3O)C(O)C2O)C(O)C(O)C1O	0	0	0	0	0	0	0	0	0	0	0	0	0	0	0	0	0	0	0	0	0	0	0	0	0	0	0	0	0	0	0	0	0	0	0	0	0	0	0	0	0	0	0	0	0	0	0
1130	Amylose	OCC1OC(O)C(O)C(O)C1O	0	0	0	0	0	0	0	0	0	0	0	0	0	0	0	0	0	0	0	0	0	0	0	0	0	0	0	0	0	0	0	0	0	0	0	0	0	0	0	0	0	0	0	0	0	0	0
1131	Sucrose	OCC1OC(OC2(CO)OC(CO)C(O)C2O)C(O)C(O)C1O	0	0	0	0	0	0	0	0	0	0	0	0	0	0	0	0	0	0	0	0	0	0	0	0	0	0	0	0	0	0	0	0	0	0	0	0	0	0	0	0	0	0	0	0	0	0	0
1132	Sucrose octaacetate	CC(=O)OCC1OC(OC2(COC(C)=O)OC(COC(C)=O)C(OC(C)=O)C2OC(C)=O)C(OC(C)=O)C(OC(C)=O)C1OC(C)=O	0	0	0	0	0	0	0	0	0	0	0	0	0	0	0	0	0	0	0	0	0	0	0	0	0	0	0	0	0	0	0	0	0	0	0	0	0	0	0	0	0	0	0	0	0	0	0
1133	Xylan	OC1OC(O)C(O)C(O)C1O	0	0	0	0	0	0	0	0	0	0	0	0	0	0	0	0	0	0	0	0	0	0	0	0	0	0	0	0	0	0	0	0	0	0	0	0	0	0	0	0	0	0	0	0	0	0	0
1134	Xylitol	OCC(O)C(O)C(O)CO	0	0	0	0	0	0	0	0	0	0	0	0	0	0	0	0	0	0	0	0	0	0	0	0	0	0	0	0	0	0	0	0	0	0	0	0	0	0	0	0	0	0	0	0	0	0	0
1135	Xylobiose	O=CC(O)C(O)C(CO)OC1OCC(O)C(O)C1O.OC1COC(OC2COC(O)C(O)C2O)C(O)C1O	0	0	0	0	0	0	0	0	0	0	0	0	0	0	0	0	0	0	0	0	0	0	0	0	0	0	0	0	0	0	0	0	0	0	0	0	0	0	0	0	0	0	0	0	0	0	0
1136	D-Xylose	O=CC(O)C(O)C(O)CO	0	0	0	0	0	0	0	0	0	0	0	0	0	0	0	0	0	0	0	0	0	0	0	0	0	0	0	0	0	0	0	0	0	0	0	0	0	0	0	0	0	0	0	0	0	0	0
1137	D-erythro-Eritadenine	Nc1ncnc2c1ncn2CC(O)C(O)C(=O)O	0	0	0	0	0	0	0	0	0	0	0	0	0	0	0	0	0	0	0	0	0	0	0	0	0	0	0	0	0	0	0	0	0	0	0	0	0	0	0	0	0	0	0	0	0	0	0
1138	Chiro-Inositol	OC1C(O)C(O)C(O)C(O)C1O	0	0	0	0	0	0	0	0	0	0	0	0	0	0	0	0	0	0	0	0	0	0	0	0	0	0	0	0	0	0	0	0	0	0	0	0	0	0	0	0	0	0	0	0	0	0	0
1139	Cryptoxanthin diepoxide	CC(C=CC=C(C)C=CC12OC1(C)CCCC2(C)C)=CC=CC=C(C)C=CC=C(C)C=CC12OC1(C)CC(O)CC2(C)C	0	0	0	0	0	0	0	0	0	0	0	0	0	0	0	0	0	0	0	0	0	0	0	0	0	0	0	0	0	0	0	0	0	0	0	0	1	0	0	0	0	0	0	0	0	0	0
1140	Serotinose	OC1COC(OCC2OC(O)C(O)C(O)C2O)C(O)C1O	0	0	0	0	0	0	0	0	0	0	0	0	0	0	0	0	0	0	0	0	0	0	0	0	0	0	0	0	0	0	0	0	0	0	0	0	0	0	0	0	0	0	0	0	0	0	0
1141	Inulin	OCC1OC(OC2(COC3(CO)OC(CO)C(O)C3O)OC(CO)C(O)C2O)C(O)C(O)C1O	0	0	0	0	0	0	0	0	0	0	0	0	0	0	0	0	0	0	0	0	0	0	0	0	0	0	0	0	0	0	0	0	0	0	0	0	0	0	0	0	0	0	0	0	0	0	0
1142	Inulobiose	OCC1OC(O)(COC2(CO)OC(CO)C(O)C2O)C(O)C1O	0	0	0	0	0	0	0	0	0	0	0	0	0	0	0	0	0	0	0	0	0	0	0	0	0	0	0	0	0	0	0	0	0	0	0	0	0	0	0	0	0	0	0	0	0	0	0
1143	Kojibiose	O=CC(OC1OC(CO)C(O)C(O)C1O)C(O)C(O)C(O)CO.OCC(O)C1OC(O)C(OC2OC(CO)C(O)C(O)C2O)C1O.OCC1OC(OC2C(O)OC(CO)C(O)C2O)C(O)C(O)C1O	0	0	0	0	0	0	0	0	0	0	0	0	0	0	0	0	0	0	0	0	0	0	0	0	0	0	0	0	0	0	0	0	0	0	0	0	0	0	0	0	0	0	0	0	0	0	0
1144	Calcium lactobionate	O=C(O)C(O)C(O)C(OC1OC(CO)C(O)C(O)C1O)C(O)CO	0	0	0	0	0	0	0	0	0	0	0	0	0	0	0	0	0	0	0	0	0	0	0	0	0	0	0	0	0	0	0	0	0	0	0	0	0	0	0	0	0	0	0	0	0	0	0
1145	Lactose	OCC1OC(OC2C(CO)OC(O)C(O)C2O)C(O)C(O)C1O	0	0	0	0	0	0	0	0	0	0	0	0	0	0	0	0	0	0	0	0	0	0	0	0	0	0	0	0	0	0	0	0	0	0	0	0	0	0	0	0	0	0	0	0	0	0	0
1146	Lucuminoside	N#CC(OC1OC(COC2OCC(O)C(O)C2O)C(O)C(O)C1O)c1ccccc1	0	0	0	0	0	0	0	0	0	0	0	0	0	0	0	0	0	0	0	0	0	0	0	0	0	0	0	0	0	0	0	0	0	0	0	0	0	0	0	0	0	0	0	0	0	0	0
1147	Galactinol	OCC1OC(OC2C(O)C(O)C(O)C(O)C2O)C(O)C(O)C1O	0	0	0	0	0	0	0	0	0	0	0	0	0	0	0	0	0	0	0	0	0	0	0	0	0	0	0	0	0	0	0	0	0	0	0	0	0	0	0	0	0	0	0	0	0	0	0
1148	L-Galacto-2-heptulose	OCC1OC(O)(CO)C(O)C(O)C1O	0	0	0	0	0	0	0	0	0	0	0	0	0	0	0	0	0	0	0	0	0	0	0	0	0	0	0	0	0	0	0	0	0	0	0	0	0	0	0	0	0	0	0	0	0	0	0
1150	Galabiose	O=CC(O)C(O)C(OC1OC(CO)C(O)C(O)C1O)C(O)CO.OCC1OC(OC2C(CO)OC(O)C(O)C2O)C(O)C(O)C1O	0	0	0	0	0	0	0	0	0	0	0	0	0	0	0	0	0	0	0	0	0	0	0	0	0	0	0	0	0	0	0	0	0	0	0	0	0	0	0	0	0	0	0	0	0	0	0
1151	4-O-beta-D-Galactopyranosyl-D-galactose	OCC1OC(OC2C(CO)OC(O)C(O)C2O)C(O)C(O)C1O	0	0	0	0	0	0	0	0	0	0	0	0	0	0	0	0	0	0	0	0	0	0	0	0	0	0	0	0	0	0	0	0	0	0	0	0	0	0	0	0	0	0	0	0	0	0	0
1152	Kaempferol 3-feruloylapioside	COc1cc(C=CC(=O)OCC2(O)COC(Oc3c(-c4ccc(O)cc4)oc4cc(O)cc(O)c4c3=O)C2O)ccc1O	0	0	0	0	0	0	0	0	0	0	0	0	0	0	0	0	0	0	0	0	0	0	0	0	0	0	0	0	0	0	0	0	0	0	0	0	0	0	0	0	0	0	0	0	0	0	0
1153	3,5-Dicaffeoyl-4-succinoylquinic acid	O=C(O)CCC(=O)OC1C(OC(=O)C=Cc2ccc(O)c(O)c2)CC(O)(C(=O)O)CC1OC(=O)C=Cc1ccc(O)c(O)c1	0	0	0	0	0	0	0	0	0	0	0	0	0	0	0	0	0	0	0	0	0	0	0	0	0	0	0	0	0	0	0	0	0	0	0	0	0	0	0	0	0	0	0	0	0	0	0
1154	Kanzonol T	CC(C)(O)CCc1c(O)cc2occ(-c3ccc4c(c3O)C=CC(C)(C)O4)c(=O)c2c1O	0	0	0	0	0	0	0	0	0	0	0	0	0	0	0	0	0	0	0	0	0	0	0	0	0	0	0	0	0	0	0	0	0	0	0	0	0	0	0	0	0	0	0	0	0	0	0
1155	Artonin T	COc1cc(O)c2c(=O)c3c(oc2c1)-c1c(O)c(CC=C(C)C)c(O)c2c1C(C3)C(C)(C)O2	0	0	0	0	0	0	0	0	0	0	0	0	0	0	0	0	0	0	0	0	0	0	0	0	0	0	0	0	0	0	0	0	0	0	0	0	0	0	0	0	0	0	0	0	0	0	0
1156	Capsianoside C	C=CC(C)(CCC=C(C)CCC=C(C)CCC=C(C)COC1OC(C)C(O)C(OC2OC(COC3OC(C)C(O)C(O)C3OC(=O)C(C)=CC(O)CC(C)=CCCC(C)=CCCC(C)(C=C)OC3OC(CO)C(O)C(O)C3OC3OC(CO)C(O)C(O)C3O)C(O)C(O)C2O)C1O)OC1OC(CO)C(O)C(O)C1OC1OC(CO)C(O)C(O)C1O	0	0	0	0	0	0	0	0	0	0	0	0	0	0	0	0	0	0	0	0	0	0	0	0	0	0	0	0	0	0	0	0	0	0	0	0	0	0	0	0	0	0	0	0	0	0	0
1157	Capsianoside E	C=CC(C)(CCC=C(C)CCC=C(C)CCC=C(C)COC1OC(C)C(O)C(OC2OC(COC3OC(C)C(O)C(O)C3OC(=O)C(C)=CCCC(C)=CCCC(C)=CCCC(C)(C=C)OC3OC(CO)C(O)C(O)C3OC3OC(CO)C(O)C(O)C3O)C(O)C(O)C2O)C1O)OC1OC(CO)C(O)C(O)C1OC1OC(CO)C(O)C(O)C1O	0	0	0	0	0	0	0	0	0	0	0	0	0	0	0	0	0	0	0	0	0	0	0	0	0	0	0	0	0	0	0	0	0	0	0	0	0	0	0	0	0	0	0	0	0	0	0
1158	Apigenin 5-[4''-rhamnosyl-6''-acetylglucoside]	CC(=O)OCC1OC(Oc2cc(O)cc3oc(-c4ccc(O)cc4)cc(=O)c23)C(O)C(O)C1OC1OC(C)C(O)C(O)C1O	0	0	0	0	0	0	0	0	0	0	0	0	0	0	0	0	0	0	0	0	0	0	0	0	0	0	0	0	0	0	0	0	0	0	0	0	0	0	0	0	0	0	0	0	0	0	0
1159	alpha-D-Galactopyranose 1-dihydrogen phosphate	O=P(O)(O)OC1OC(CO)C(O)C(O)C1O	0	0	0	0	0	0	0	0	0	0	0	0	0	0	0	0	0	0	0	0	0	0	0	0	0	0	0	0	0	0	0	0	0	0	0	0	0	0	0	0	0	0	0	0	0	0	0
1160	Galacturonic acid	O=CC(O)C(O)C(O)C(O)C(=O)O	0	0	0	0	0	0	0	0	0	0	0	0	0	0	0	0	0	0	0	0	0	0	0	0	0	0	0	0	0	0	0	0	0	0	0	0	0	0	0	0	0	0	0	0	0	0	0
1161	D-Galacturonic acid	O=C(O)C(O)C1OC(O)C(O)C1O.O=C(O)C1OC(O)C(O)C(O)C1O.O=CC(O)C(O)C(O)C(O)C(=O)O	0	0	0	0	0	0	0	0	0	0	0	0	0	0	0	0	0	0	0	0	0	0	0	0	0	0	0	0	0	0	0	0	0	0	0	0	0	0	0	0	0	0	0	0	0	0	0
1162	Gein	C=CCc1ccc(OC2OC(COC3OCC(O)C(O)C3O)C(O)C(O)C2O)c(OC)c1	0	0	0	0	0	0	0	0	0	0	0	0	0	0	0	0	0	0	0	0	0	0	0	0	0	0	0	0	0	0	0	0	0	0	0	0	0	0	0	0	0	0	0	0	0	0	0
1163	Gentiotriose	OCC1OC(OCC2OC(OCC3OC(O)C(O)C(O)C3O)C(O)C(O)C2O)C(O)C(O)C1O	0	0	0	0	0	0	0	0	0	0	0	0	0	0	0	0	0	0	0	0	0	0	0	0	0	0	0	0	0	0	0	0	0	0	0	0	0	0	0	0	0	0	0	0	0	0	0
1164	1-O-alpha-D-Glucopyranosyl-D-mannitol	OCC(O)C(O)C(O)C(O)COC1OC(CO)C(O)C(O)C1O	0	0	0	0	0	0	0	0	0	0	0	0	0	0	0	0	0	0	0	0	0	0	0	0	0	0	0	0	0	0	0	0	0	0	0	0	0	0	0	0	0	0	0	0	0	0	0
1165	N-Glycolylneuraminic acid	O=C(CO)NC1C(O)CC(O)(C(=O)O)OC1C(O)C(O)CO	0	0	0	0	0	0	0	0	0	0	0	0	0	0	0	0	0	0	0	0	0	0	0	0	0	0	0	0	0	0	0	0	0	0	0	0	0	0	0	0	0	0	0	0	0	0	0
1167	Disodium guanylate	Nc1nc2c(ncn2C2OC(COP(=O)(O)O)C(O)C2O)c(=O)[nH]1.[Na+].[Na+]	0	0	0	0	0	0	0	0	0	0	0	0	0	0	0	0	0	0	0	0	0	0	0	0	0	0	0	0	0	0	0	0	0	0	0	0	0	0	0	0	0	0	0	0	0	0	0
1168	Gynocardin	N#CC1(OC2OC(CO)C(O)C(O)C2O)C=CC(O)C1O	0	0	0	0	0	0	0	0	0	0	0	0	0	0	0	0	0	0	0	0	0	0	0	0	0	0	0	0	0	0	0	0	0	0	0	0	0	0	0	0	0	0	0	0	0	0	0
1169	Tetraphyllin B	N#CC1(OC2OC(CO)C(O)C(O)C2O)C=CC(O)C1	0	0	0	0	0	0	0	0	0	0	0	0	0	0	0	0	0	0	0	0	0	0	0	0	0	0	0	0	0	0	0	0	0	0	0	0	0	0	0	0	0	0	0	0	0	0	0
1170	(-)-Quinic acid	O=C(O)C1(O)CC(O)C(O)C(O)C1	0	0	0	0	0	0	0	0	0	0	0	0	0	0	0	0	0	0	0	0	0	0	0	0	0	0	0	0	0	0	0	0	0	0	0	0	0	0	0	0	0	0	0	0	0	0	0
1171	D-4-O-Methyl-myo-inositol	COC1C(O)C(O)C(O)C(O)C1O	0	0	0	0	0	0	0	0	0	0	0	0	0	0	0	0	0	0	0	0	0	0	0	0	0	0	0	0	0	0	0	0	0	0	0	0	0	0	0	0	0	0	0	0	0	0	0
1172	4-O-Methyl-myo-inositol	COC1C(O)C(O)C(O)C(O)C1O	0	0	0	0	0	0	0	0	0	0	0	0	0	0	0	0	0	0	0	0	0	0	0	0	0	0	0	0	0	0	0	0	0	0	0	0	0	0	0	0	0	0	0	0	0	0	0
1173	2-O-(4-O-Methyl-a-D-glucopyranuronosyl)-D-xylose	COC1C(C(=O)O)OC(OC2C(O)OC(CO)C2O)C(O)C1O	0	0	0	0	0	0	0	0	0	0	0	0	0	0	0	0	0	0	0	0	0	0	0	0	0	0	0	0	0	0	0	0	0	0	0	0	0	0	0	0	0	0	0	0	0	0	0
1174	Arabinofuranobiose	OCC1OC(OC2C(CO)OC(O)C2O)C(O)C1O	0	0	0	0	0	0	0	0	0	0	0	0	0	0	0	0	0	0	0	0	0	0	0	0	0	0	0	0	0	0	0	0	0	0	0	0	0	0	0	0	0	0	0	0	0	0	0
1175	Maltulose	O=C(CO)C(O)C(O)C(CO)OC1OC(CO)C(O)C(O)C1O.OCC1OC(OC2COC(O)(CO)C(O)C2O)C(O)C(O)C1O	0	0	0	0	0	0	0	0	0	0	0	0	0	0	0	0	0	0	0	0	0	0	0	0	0	0	0	0	0	0	0	0	0	0	0	0	0	0	0	0	0	0	0	0	0	0	0
1176	Isodulcitol	CC(O)C(O)C(O)C(O)C=O.CC(O)C1OC(O)C(O)C1O.CC1OC(O)C(O)C(O)C1O	0	0	0	0	0	0	0	0	0	0	0	0	0	0	0	0	0	0	0	0	0	0	0	0	0	0	0	0	0	0	0	0	0	0	0	0	0	0	0	0	0	0	0	0	0	0	0
1177	beta-D-3-Ribofuranosyluric acid	O=c1nc(O)c2nc(O)[nH]c2n1C1OC(CO)C(O)C1O	0	0	0	0	0	0	0	0	0	0	0	0	0	0	0	0	0	0	0	0	0	0	0	0	0	0	0	0	0	0	0	0	0	0	0	0	0	0	0	0	0	0	0	0	0	0	0
1178	Neokestose	OCC1OC(CO)(OCC2OC(OC3(CO)OC(CO)C(O)C3O)C(O)C(O)C2O)C(O)C1O	0	0	0	0	0	0	0	0	0	0	0	0	0	0	0	0	0	0	0	0	0	0	0	0	0	0	0	0	0	0	0	0	0	0	0	0	0	0	0	0	0	0	0	0	0	0	0
1179	Galactotriose	OCC1OC(OC2C(O)C(CO)OC(OC3C(O)C(O)OC(CO)C3O)C2O)C(O)C(O)C1O	0	0	0	0	0	0	0	0	0	0	0	0	0	0	0	0	0	0	0	0	0	0	0	0	0	0	0	0	0	0	0	0	0	0	0	0	0	0	0	0	0	0	0	0	0	0	0
1180	Xanthan	CC(=O)OCC1OC(OC2C(O)C(CP)OC(CO)C2OC2OC(CO)C(OP)C(O)C2O)C(OC2OC(C(=O)O)C(OC3OC4COC(C)(C(=O)O)OC4C(O)C3O)C(O)C2O)C(O)C1O	0	0	0	0	0	0	0	0	0	0	0	0	0	0	0	0	0	0	0	0	0	0	0	0	0	0	0	0	0	0	0	0	0	0	0	0	0	0	0	0	0	0	0	0	0	0	0
1182	Cellulose	OCC1OC(OC2C(CO)OC(O)C(O)C2O)C(O)C(O)C1O	0	0	0	0	0	0	0	0	0	0	0	0	0	0	0	0	0	0	0	0	0	0	0	0	0	0	0	0	0	0	0	0	0	0	0	0	0	0	0	0	0	0	0	0	0	0	0
1183	Cellulose acetate	CC(=O)OCC1OC(OC2C(COC(C)=O)OC(OC(C)=O)C(OC(C)=O)C2OC(C)=O)C(OC(C)=O)C(OC(C)=O)C1OC(C)=O.CCC(=O)OCC1OC(OC2C(COC(=O)CC)OC(OC(=O)CC)C(OC(=O)CC)C2OC(=O)CC)C(OC(=O)CC)C(OC(=O)CC)C1OC(=O)CC.OCC1OC(OC2C(CO)OC(O)C(O)C2O)C(O)C(O)C1O	0	0	0	0	0	0	0	0	0	0	0	0	0	0	0	0	0	0	0	0	0	0	0	0	0	0	0	0	0	0	0	0	0	0	0	0	0	0	0	0	0	0	0	0	0	0	0
1184	Methyl cellulose	COCC1OC(OC2C(COC)OC(OC)C(OC)C2OC)C(OC)C(OC)C1OC	0	0	0	0	0	0	0	0	0	0	0	0	0	0	0	0	0	0	0	0	0	0	0	0	0	0	0	0	0	0	0	0	0	0	0	0	0	0	0	0	0	0	0	0	0	0	0
1185	Betadex	OCC1OC2OC3C(CO)OC(OC4C(CO)OC(OC5C(CO)OC(OC6C(CO)OC(OC7C(CO)OC(OC8C(CO)OC(OC1C(O)C2O)C(O)C8O)C(O)C7O)C(O)C6O)C(O)C5O)C(O)C4O)C(O)C3O	0	0	0	0	0	0	0	0	0	0	0	0	0	0	0	0	0	0	0	0	0	0	0	0	0	0	0	0	0	0	0	0	0	0	0	0	0	0	0	0	0	0	0	0	0	0	0
1186	gamma-Cyclodextrin	OCC1OC2OC3C(CO)OC(OC4C(CO)OC(OC5C(CO)OC(OC6C(CO)OC(OC7C(CO)OC(OC8C(CO)OC(OC9C(CO)OC(OC1C(O)C2O)C(O)C9O)C(O)C8O)C(O)C7O)C(O)C6O)C(O)C5O)C(O)C4O)C(O)C3O	0	0	0	0	0	0	0	0	0	0	0	0	0	0	0	0	0	0	0	0	0	0	0	0	0	0	0	0	0	0	0	0	0	0	0	0	0	0	0	0	0	0	0	0	0	0	0
1187	Deoxyeritadenine	Nc1ncnc2c1ncn2CCC(O)C(=O)O	0	0	0	0	0	0	0	0	0	0	0	0	0	0	0	0	0	0	0	0	0	0	0	0	0	0	0	0	0	0	0	0	0	0	0	0	0	0	0	0	0	0	0	0	0	0	0
1188	Dextrantriose	OCC1OC(OCC2OC(OCC3OC(O)C(O)C(O)C3O)C(O)C(O)C2O)C(O)C(O)C1O	0	0	0	0	0	0	0	0	0	0	0	0	0	0	0	0	0	0	0	0	0	0	0	0	0	0	0	0	0	0	0	0	0	0	0	0	0	0	0	0	0	0	0	0	0	0	0
1189	6-O-Glucosylmaltose	OCC1OC(OCC2OC(O)C(O)C(O)C2OC2OC(CO)C(O)C(O)C2O)C(O)C(O)C1O	0	0	0	0	0	0	0	0	0	0	0	0	0	0	0	0	0	0	0	0	0	0	0	0	0	0	0	0	0	0	0	0	0	0	0	0	0	0	0	0	0	0	0	0	0	0	0
1190	Maltobionic acid	O=C(O)C(O)C(O)C(OC1OC(CO)C(O)C(O)C1O)C(O)CO	0	0	0	0	0	0	0	0	0	0	0	0	0	0	0	0	0	0	0	0	0	0	0	0	0	0	0	0	0	0	0	0	0	0	0	0	0	0	0	0	0	0	0	0	0	0	0
1191	Maltohexaose	OCC1OC(OC2C(CO)OC(OC3C(CO)OC(OC4C(CO)OC(OC5C(CO)OC(OC6C(CO)OC(O)C(O)C6O)C(O)C5O)C(O)C4O)C(O)C3O)C(O)C2O)C(O)C(O)C1O	0	0	0	0	0	0	0	0	0	0	0	0	0	0	0	0	0	0	0	0	0	0	0	0	0	0	0	0	0	0	0	0	0	0	0	0	0	0	0	0	0	0	0	0	0	0	0
1192	Maltopentaose	OCC1OC(OC2C(CO)OC(OC3C(CO)OC(OC4C(CO)OC(OC5C(CO)OC(O)C(O)C5O)C(O)C4O)C(O)C3O)C(O)C2O)C(O)C(O)C1O	0	0	0	0	0	0	0	0	0	0	0	0	0	0	0	0	0	0	0	0	0	0	0	0	0	0	0	0	0	0	0	0	0	0	0	0	0	0	0	0	0	0	0	0	0	0	0
1193	Maltose	OCC1OC(OC2C(CO)OC(O)C(O)C2O)C(O)C(O)C1O	0	0	0	0	0	0	0	0	0	0	0	0	0	0	0	0	0	0	0	0	0	0	0	0	0	0	0	0	0	0	0	0	0	0	0	0	0	0	0	0	0	0	0	0	0	0	0
1194	beta-D-Fructofuranosyl alpha-D-glucopyranosyl-(1->4)-D-glucopyranoside	OCC1OC(OC2C(CO)OC(OC3(CO)OC(CO)C(O)C3O)C(O)C2O)C(O)C(O)C1O	0	0	0	0	0	0	0	0	0	0	0	0	0	0	0	0	0	0	0	0	0	0	0	0	0	0	0	0	0	0	0	0	0	0	0	0	0	0	0	0	0	0	0	0	0	0	0
1195	Maltotetraose	OCC1OC(OC2C(CO)OC(OC3C(CO)OC(OC4C(CO)OC(O)C(O)C4O)C(O)C3O)C(O)C2O)C(O)C(O)C1O	0	0	0	0	0	0	0	0	0	0	0	0	0	0	0	0	0	0	0	0	0	0	0	0	0	0	0	0	0	0	0	0	0	0	0	0	0	0	0	0	0	0	0	0	0	0	0
1196	Maltotriose	O=CC(O)C(O)C(OC1OC(CO)C(OC2OC(CO)C(O)C(O)C2O)C(O)C1O)C(O)CO	0	0	0	0	0	0	0	0	0	0	0	0	0	0	0	0	0	0	0	0	0	0	0	0	0	0	0	0	0	0	0	0	0	0	0	0	0	0	0	0	0	0	0	0	0	0	0
1197	Mannan	OCC1OC(OC2C(CO)OC(OC3C(CO)OC(OC4C(CO)OC(O)C(O)C4O)C(O)C3O)C(O)C2O)C(O)C(O)C1O	0	0	0	0	0	0	0	0	0	0	0	0	0	0	0	0	0	0	0	0	0	0	0	0	0	0	0	0	0	0	0	0	0	0	0	0	0	0	0	0	0	0	0	0	0	0	0
1198	D-Arabino-hexos-2-ulose	O=CC(=O)C(O)C(O)C(O)CO	0	0	0	0	0	0	0	0	0	0	0	0	0	0	0	0	0	0	0	0	0	0	0	0	0	0	0	0	0	0	0	0	0	0	0	0	0	0	0	0	0	0	0	0	0	0	0
1199	Mannobiose	OCC1OC(OC2C(CO)OC(O)C(O)C2O)C(O)C(O)C1O	0	0	0	0	0	0	0	0	0	0	0	0	0	0	0	0	0	0	0	0	0	0	0	0	0	0	0	0	0	0	0	0	0	0	0	0	0	0	0	0	0	0	0	0	0	0	0
1200	D-1-Deoxy-erythro-hexo-2,3-diulose	CC(=O)C1(O)OCC(O)C1O	0	0	0	0	0	0	0	0	0	0	0	0	0	0	0	0	0	0	0	0	0	0	0	0	0	0	0	0	0	0	0	0	0	0	0	0	0	0	0	0	0	0	0	0	0	0	0
1201	D-Manno-2-heptulose	OCC1OC(O)(CO)C(O)C(O)C1O	0	0	0	0	0	0	0	0	0	0	0	0	0	0	0	0	0	0	0	0	0	0	0	0	0	0	0	0	0	0	0	0	0	0	0	0	0	0	0	0	0	0	0	0	0	0	0
1202	D-Mannose	O=CC(O)C(O)C(O)C(O)CO.OCC(O)C1OC(O)C(O)C1O.OCC1OC(O)C(O)C(O)C1O	0	0	0	0	0	0	0	0	0	0	0	0	0	0	0	0	0	0	0	0	0	0	0	0	0	0	0	0	0	0	0	0	0	0	0	0	0	0	0	0	0	0	0	0	0	0	0
1203	Melezitose	OCC1OC(OC2C(O)C(CO)OC2(CO)OC2OC(CO)C(O)C(O)C2O)C(O)C(O)C1O	0	0	0	0	0	0	0	0	0	0	0	0	0	0	0	0	0	0	0	0	0	0	0	0	0	0	0	0	0	0	0	0	0	0	0	0	0	0	0	0	0	0	0	0	0	0	0
1204	Melibiose	O=CC(O)C(O)C(O)C(O)COC1OC(CO)C(O)C(O)C1O.OCC1OC(OCC(O)C2OC(O)C(O)C2O)C(O)C(O)C1O.OCC1OC(OCC2OC(O)C(O)C(O)C2O)C(O)C(O)C1O	0	0	0	0	0	0	0	0	0	0	0	0	0	0	0	0	0	0	0	0	0	0	0	0	0	0	0	0	0	0	0	0	0	0	0	0	0	0	0	0	0	0	0	0	0	0	0
1205	Galactaric acid	O=C(O)C(O)C(O)C(O)C(O)C(=O)O	0	0	0	0	0	0	0	0	0	0	0	0	0	0	0	0	0	0	0	0	0	0	0	0	0	0	0	0	0	0	0	0	0	0	0	0	0	0	0	0	0	0	0	0	0	0	0
1206	(2S,4R,5S)-Muscarine	CC1OC(C[N+](C)(C)C)CC1O	0	0	0	0	0	0	0	0	0	0	0	0	0	0	0	0	0	0	0	0	0	0	0	0	0	0	0	0	0	0	0	0	0	0	0	0	0	0	0	0	0	0	0	0	0	0	0
1207	Panose	OCC1OC(OCC2OC(OC3C(CO)OC(O)C(O)C3O)C(O)C(O)C2O)C(O)C(O)C1O	0	0	0	0	0	0	0	0	0	0	0	0	0	0	0	0	0	0	0	0	0	0	0	0	0	0	0	0	0	0	0	0	0	0	0	0	0	0	0	0	0	0	0	0	0	0	0
1208	Acaciabiuronic acid	O=C(O)C1OC(OCC2OC(O)C(O)C(O)C2O)C(O)C(O)C1O	0	0	0	0	0	0	0	0	0	0	0	0	0	0	0	0	0	0	0	0	0	0	0	0	0	0	0	0	0	0	0	0	0	0	0	0	0	0	0	0	0	0	0	0	0	0	0
1209	N-Acetylneuraminic acid	CC(=O)NC(C(O)CC(=O)C(=O)O)C(O)C(O)C(O)CO.CC(=O)NC1C(O)CC(O)(C(=O)O)OC1C(O)C(O)CO	0	0	0	0	0	0	0	0	0	0	0	0	0	0	0	0	0	0	0	0	0	0	0	0	0	0	0	0	0	0	0	0	0	0	0	0	0	0	0	0	0	0	0	0	0	0	0
1210	6-Amino-9H-purine-9-propanoic acid	Nc1ncnc2c1ncn2CCC(=O)O	0	0	0	0	0	0	0	0	0	0	0	0	0	0	0	0	0	0	0	0	0	0	0	0	0	0	0	0	0	0	0	0	0	0	0	0	0	0	0	0	0	0	0	0	0	0	0
1211	Adenosine 5'-diphosphate glucose	Nc1ncnc2c1ncn2C1OC(COP(=O)(O)OP(=O)(O)OC2OC(CO)C(O)C(O)C2O)C(O)C1O	0	0	0	0	0	0	0	0	0	0	0	0	0	0	0	0	0	0	0	0	0	0	0	0	0	0	0	0	0	0	0	0	0	0	0	0	0	0	0	0	0	0	0	0	0	1	0
1212	Alginic acid	O=C(O)C1OC(OC2C(C(=O)O)OC(OP)C(O)C2O)C(O)C(O)C1P	0	0	0	0	0	0	0	0	0	0	0	0	0	0	0	0	0	0	0	0	0	0	0	0	0	0	0	0	0	0	0	0	0	0	0	0	0	0	0	0	0	0	0	0	0	0	0
1213	Acadesine 5'-monophosphate	NC(=O)c1ncn(C2OC(COP(=O)(O)O)C(O)C2O)c1N	0	0	0	0	0	0	0	0	0	0	0	0	0	0	0	0	0	0	0	0	0	0	0	0	0	0	0	0	0	0	0	0	0	0	0	0	0	0	0	0	0	0	0	0	0	0	0
1214	D-Apiose	OCC1(O)COC(O)C1O	0	0	0	0	0	0	0	0	0	0	0	0	0	0	0	0	0	0	0	0	0	0	0	0	0	0	0	0	0	0	0	0	0	0	0	0	0	0	0	0	0	0	0	0	0	0	0
1215	beta-D-Apiofuranose	OCC1(O)COC(O)C1O	0	0	0	0	0	0	0	0	0	0	0	0	0	0	0	0	0	0	0	0	0	0	0	0	0	0	0	0	0	0	0	0	0	0	0	0	0	0	0	0	0	0	0	0	0	0	0
1216	Arabinan	Nc1ccn(C2OC(CO)C(O)C2O)c(=O)n1	0	0	0	0	0	0	0	0	0	0	0	0	0	0	0	0	0	0	0	0	0	0	0	0	0	0	0	0	0	0	0	0	0	0	0	0	0	0	0	0	0	0	0	0	0	0	0
1217	Gum arabic	O=C(O)CCCCCCCN=C(O)c1ccccc1[O-].[Na+]	0	0	0	0	0	0	0	0	0	0	0	0	0	0	0	0	0	0	0	0	0	0	0	0	0	0	0	0	0	0	0	1	0	0	0	0	0	0	0	0	0	0	0	0	0	0	0
1218	Arabinose	O=CC(O)C(O)C(O)CO	0	0	0	0	0	0	0	0	0	0	0	0	0	0	0	0	0	0	0	0	0	0	0	0	0	0	0	0	0	0	0	0	0	0	0	0	0	0	0	0	0	0	0	0	0	0	0
1219	D-Arabinose	O=CC(O)C(O)C(O)CO	0	0	0	0	0	0	0	0	0	0	0	0	0	0	0	0	0	0	0	0	0	0	0	0	0	0	0	0	0	0	0	0	0	0	0	0	0	0	0	0	0	0	0	0	0	0	0
1220	Isomaltose	O=CC(O)C(O)C(O)C(O)COC1OC(CO)C(O)C(O)C1O.OCC1OC(OCC(O)C2OC(O)C(O)C2O)C(O)C(O)C1O.OCC1OC(OCC2OC(O)C(O)C(O)C2O)C(O)C(O)C1O	0	0	0	0	0	0	0	0	0	0	0	0	0	0	0	0	0	0	0	0	0	0	0	0	0	0	0	0	0	0	0	0	0	0	0	0	0	0	0	0	0	0	0	0	0	0	0
1221	Arbutin	OCC1OC(Oc2ccc(O)cc2)C(O)C(O)C1O	0	0	0	0	0	0	0	0	0	0	0	0	0	0	0	0	0	0	0	0	0	0	0	0	0	0	0	0	0	0	0	0	0	0	0	0	0	0	0	0	0	0	0	0	0	0	0
1222	Ascorbalamic acid	O=C(O)C1CC(O)(C2(O)OCC(O)C2O)C(O)=N1	0	0	0	0	0	0	0	0	0	0	0	0	0	0	0	0	0	0	0	0	0	0	0	0	0	0	0	0	0	0	0	0	0	0	0	0	0	0	0	0	0	0	0	0	0	0	0
1223	Ascorbic acid	O=C1OC(C(O)CO)C(O)=C1O	0	0	0	0	0	0	0	0	0	0	0	0	0	0	0	0	0	0	0	0	0	0	0	0	0	0	0	0	0	0	0	0	0	0	0	0	0	0	0	0	0	0	0	0	0	0	0
1224	L-Ascorbic acid	O=C1OC(C(O)CO)C(O)=C1O	0	0	0	0	0	0	0	0	0	0	0	0	0	0	0	0	0	0	0	0	0	0	0	0	0	0	0	0	0	0	0	0	0	0	0	0	0	0	0	0	0	0	0	0	0	0	0
1225	Calcium ascorbate	O=C1OC(C(O)CO)C(O)=C1O.O=C1OC(C(O)CO)C(O)=C1O.[Ca+2]	0	0	0	0	0	0	0	0	0	0	0	0	0	0	0	0	0	0	0	0	0	0	0	0	0	0	0	0	0	0	0	0	0	0	0	0	0	0	0	0	0	0	0	0	0	0	0
1226	Sodium ascorbate	O=C1OC(C(O)CO)C(O)=C1O.[Na+]	0	0	0	0	0	0	0	0	0	0	0	0	0	0	0	0	0	0	0	0	0	0	0	0	0	0	0	0	0	0	0	0	0	0	0	0	0	0	0	0	0	0	0	0	0	0	0
1227	Scleroglucan	OCC1OC(OCC2OC(OC3C(O)C(P)OC(CO)C3O)C(O)C(OC3OC(CO)C(O)C(OP)C3O)C2O)C(O)C(O)C1O	0	0	0	0	0	0	0	0	0	0	0	0	0	0	0	0	0	0	0	0	0	0	0	0	0	0	0	0	0	0	0	0	0	0	0	0	0	0	0	0	0	0	0	0	0	0	0
1228	Pangamic acid	CC(C)N(C(C)C)C(C(=O)OCC(O)C(O)C(O)C(O)C(=O)O)N(C(C)C)C(C)C	0	0	0	0	0	0	0	0	0	0	0	0	0	0	0	0	0	0	0	0	0	0	0	0	0	0	0	0	0	0	0	0	0	0	0	0	0	0	0	0	0	0	0	0	0	0	0
1229	Lentinan	OCC1OC(OCC2OC(OC3C(O)C(P)OC(CO)C3O)C(O)C(OC3OC(CO)C(O)C(OP)C3O)C2O)C(O)C(O)C1O	0	0	0	0	0	0	0	0	0	0	0	0	0	0	0	0	0	0	0	0	0	0	0	0	0	0	0	0	0	0	0	0	0	0	0	0	0	0	0	0	0	0	0	0	0	0	0
1230	Punicafolin	O=C(OC1OC2COC(=O)c3cc(O)c(O)c(O)c3-c3c(cc(O)c(O)c3O)C(=O)OC(C2OC(=O)c2cc(O)c(O)c(O)c2)C1OC(=O)c1cc(O)c(O)c(O)c1)c1cc(O)c(O)c(O)c1	0	0	0	0	0	0	0	0	0	0	0	0	0	0	0	0	0	0	0	0	0	0	0	0	0	0	0	0	0	0	0	0	0	0	0	0	0	1	0	0	0	0	0	0	0	0	0
1231	45,46,47-Trinoryessotoxin	C=CC=CC(C)(O)C1OC2CC3OC4CC5OC6CC7OC8CC9OC%10CC%11OC(C)(CCOS(=O)(=O)O)C(OS(=O)(=O)O)CC%11OC%10CC9OC8CCC7(C)OC6(C)CCC(C)C5OC4C(O)C3(C)OC2CC1=C	0	0	0	0	0	0	0	0	0	0	0	0	0	0	0	0	0	0	0	0	0	0	0	0	0	0	0	0	0	0	0	0	0	0	0	0	0	0	0	0	0	0	0	0	0	0	0
1232	D-altro-D-manno-Heptose	OCC(O)C1OC(O)C(O)C(O)C1O	0	0	0	0	0	0	0	0	0	0	0	0	0	0	0	0	0	0	0	0	0	0	0	0	0	0	0	0	0	0	0	0	0	0	0	0	0	0	0	0	0	0	0	0	0	0	0
1233	D-erythro-D-galacto-octitol	OCC(O)C(O)C(O)C(O)C(O)C(O)CO	0	0	0	0	0	0	0	0	0	0	0	0	0	0	0	0	0	0	0	0	0	0	0	0	0	0	0	0	0	0	0	0	0	0	0	0	0	0	0	0	0	0	0	0	0	0	0
1234	D-glycero-L-galacto-Octulose	O=C(CO)C(O)C(O)C(O)C(O)C(O)CO.OCC(O)C(O)C1OC(O)(CO)C(O)C1O.OCC(O)C1OC(O)(CO)C(O)C(O)C1O	0	0	0	0	0	0	0	0	0	0	0	0	0	0	0	0	0	0	0	0	0	0	0	0	0	0	0	0	0	0	0	0	0	0	0	0	0	0	0	0	0	0	0	0	0	0	0
1235	D-erythro-L-galacto-Nonulose	O=C(CO)C(O)C(O)C(O)C(O)C(O)C(O)CO.OCC(O)C(O)C(O)C1OC(O)(CO)C(O)C1O.OCC(O)C(O)C1OC(O)(CO)C(O)C(O)C1O	0	0	0	0	0	0	0	0	0	0	0	0	0	0	0	0	0	0	0	0	0	0	0	0	0	0	0	0	0	0	0	0	0	0	0	0	0	0	0	0	0	0	0	0	0	0	0
1236	Nebularine	OCC1OC(n2cnc3cncnc32)C(O)C1O	0	0	0	0	0	0	0	0	0	0	0	0	0	0	0	0	0	0	0	0	0	0	0	0	0	0	0	0	0	0	0	0	0	0	0	0	0	0	0	0	0	0	0	0	0	0	0
1237	Squamocin K	CCCCCCCCCCC(O)C1CCC(C2CCC(C(O)CCCCCCCCCCC3=CC(C)OC3=O)O2)O1	0	0	0	0	0	0	0	0	0	0	0	0	0	0	0	0	0	0	0	0	0	0	0	0	0	0	0	0	0	0	0	1	0	0	0	0	0	0	0	0	0	0	0	0	0	0	0
1238	Asitribin	CCCCCCC(O)CCCC(O)C1CCC(C2CCC(C(O)CCCCCCCCCCCCC3=CC(C)OC3=O)O2)O1	0	0	0	0	0	0	0	0	0	0	0	0	0	0	0	0	0	0	0	0	0	0	0	0	0	0	0	0	0	0	0	1	0	0	0	0	0	0	0	0	0	0	0	0	0	0	0
1239	Asiminenin A	CCCCCCCCCCC=CCCC(O)C1CCC(C(O)CCCCCCCCCCC(O)CC2=CC(C)OC2=O)O1	0	0	0	0	0	0	0	0	0	0	0	0	0	0	0	0	0	0	0	0	0	0	0	0	0	0	0	0	0	0	0	1	0	0	0	0	0	0	0	0	0	0	0	0	0	0	0
1240	Asimilobin	CCCCCCCCCCCCCCC(O)C1CCC(C2CCC(CCCCCC(O)CC3=CC(C)OC3=O)O2)O1	0	0	0	0	0	0	0	0	0	0	0	0	0	0	0	0	0	0	0	0	0	0	0	0	0	0	0	0	0	0	0	1	0	0	0	0	0	0	0	0	0	0	0	0	0	0	0
1241	Annomuricin A	CCCCCCCCCCCCC(O)C1CCC(C(O)CCCC(O)C(O)CCCCCC(O)CC2=CC(C)OC2=O)O1	0	0	0	0	0	0	0	0	0	0	0	0	0	0	0	0	0	0	0	0	0	0	0	0	0	0	0	0	0	0	0	1	0	0	0	0	0	0	0	0	0	0	0	0	0	0	0
1242	Annoglaucin	CCCCCCCCCCC(O)C1CCC(C2CCC(C(O)CCCCC(O)CCCCCC(O)CC3=CC(C)OC3=O)O2)O1	0	0	0	0	0	0	0	0	0	0	0	0	0	0	0	0	0	0	0	0	0	0	0	0	0	0	0	0	0	0	0	1	0	0	0	0	0	0	0	0	0	0	0	0	0	0	0
1243	Muricatin C	CCCCCCCCCC(O)CCCCC(O)C1CCC(C(O)CCCCC(=O)CCCCCC(O)CC2=CC(C)OC2=O)O1	0	0	0	0	0	0	0	0	0	0	0	0	0	0	0	0	0	0	0	0	0	0	0	0	0	0	0	0	0	0	0	1	0	0	0	0	0	0	0	0	0	0	0	0	0	0	0
1244	Muricatin A	CCCCCCCCCC(O)CCCCC(O)C(O)CCC(O)C1CCC(CCCCCC(O)CC2=CC(C)OC2=O)O1	0	0	0	0	0	0	0	0	0	0	0	0	0	0	0	0	0	0	0	0	0	0	0	0	0	0	0	0	0	0	0	1	0	0	0	0	0	0	0	0	0	0	0	0	0	0	0
1245	Fujiglucon	O=C1OC(CO)C(O)C(O)C1O	0	0	0	0	0	0	0	0	0	0	0	0	0	0	0	0	0	0	0	0	0	0	0	0	0	0	0	0	0	0	0	0	0	0	0	0	0	0	0	0	0	0	0	0	0	0	0
1246	Methyl beta-D-glucopyranoside	COC1OC(CO)C(O)C(O)C1O	0	0	0	0	0	0	0	0	0	0	0	0	0	0	0	0	0	0	0	0	0	0	0	0	0	0	0	0	0	0	0	0	0	0	0	0	0	0	0	0	0	0	0	0	0	0	0
1247	Asiminenin B	CCCCCCCCCCC=CCCC(O)C1CCC(C(O)CCCCCCCCCCC(O)CC2=CC(C)OC2=O)O1	0	0	0	0	0	0	0	0	0	0	0	0	0	0	0	0	0	0	0	0	0	0	0	0	0	0	0	0	0	0	0	1	0	0	0	0	0	0	0	0	0	0	0	0	0	0	0
1248	Annomuricin B	CCCCCCCCCCCCC(O)C1CCC(C(O)CCCC(O)C(O)CCCCCC(O)CC2=CC(C)OC2=O)O1	0	0	0	0	0	0	0	0	0	0	0	0	0	0	0	0	0	0	0	0	0	0	0	0	0	0	0	0	0	0	0	1	0	0	0	0	0	0	0	0	0	0	0	0	0	0	0
1249	Annomuricin C	CCCCCCCCCCCCC(O)C1CCC(C(O)CCCC(O)C(O)CCCCCC(O)CC2=CC(C)OC2=O)O1	0	0	0	0	0	0	0	0	0	0	0	0	0	0	0	0	0	0	0	0	0	0	0	0	0	0	0	0	0	0	0	1	0	0	0	0	0	0	0	0	0	0	0	0	0	0	0
1250	Muricatocin B	CCCCCCCCCCCCC(O)C1CCC(C(O)CCC(O)CC(O)CCCCCC(O)CC2=CC(C)OC2=O)O1	0	0	0	0	0	0	0	0	0	0	0	0	0	0	0	0	0	0	0	0	0	0	0	0	0	0	0	0	0	0	0	1	0	0	0	0	0	0	0	0	0	0	0	0	0	0	0
1251	Muricatocin C	CCCCCCCCCCCCC(O)C1CCC(C(O)CCC(O)CC(O)CCCCCC(O)CC2=CC(C)OC2=O)O1	0	0	0	0	0	0	0	0	0	0	0	0	0	0	0	0	0	0	0	0	0	0	0	0	0	0	0	0	0	0	0	1	0	0	0	0	0	0	0	0	0	0	0	0	0	0	0
1252	Muricatocin A	CCCCCCCCCCCCC(O)C1CCC(C(O)CCC(O)CC(O)CCCCCC(O)CC2=CC(C)OC2=O)O1	0	0	0	0	0	0	0	0	0	0	0	0	0	0	0	0	0	0	0	0	0	0	0	0	0	0	0	0	0	0	0	1	0	0	0	0	0	0	0	0	0	0	0	0	0	0	0
1253	Muricatin B	CCCCCCCCCCCCCC(O)C(O)C(O)CCC(O)C1CCC(CCCCCC(O)CC2=CC(C)OC2=O)O1	0	0	0	0	0	0	0	0	0	0	0	0	0	0	0	0	0	0	0	0	0	0	0	0	0	0	0	0	0	0	0	1	0	0	0	0	0	0	0	0	0	0	0	0	0	0	0
1254	Troxerutin	CC1OC(OCC2OC(Oc3c(-c4ccc(OCCO)c(OCCO)c4)oc4cc(OCCO)cc(O)c4c3=O)C(O)C(O)C2O)C(O)C(O)C1O	0	0	0	0	0	0	0	0	0	0	0	0	0	0	0	0	0	0	0	0	0	0	0	0	0	0	0	0	0	0	0	0	0	0	0	0	0	0	0	0	0	0	0	0	0	0	0
1255	Ethyl beta-D-glucopyranoside	CCOC1OC(CO)C(O)C(O)C1O	0	0	0	0	0	0	0	0	0	0	0	0	0	0	0	0	0	0	0	0	0	0	0	0	0	0	0	0	0	0	0	0	0	0	0	0	0	0	0	0	0	0	0	0	0	0	0
1256	Squamostanal A	CC1C=C(CCCCCCCCCCCCC=O)C(=O)O1	0	0	0	0	0	0	0	0	0	0	0	0	0	0	0	0	0	0	0	0	0	0	0	0	0	0	0	0	0	0	0	1	0	0	0	0	0	0	0	0	0	0	0	0	0	0	0
1257	Squamosten A	CCCCCCCCCCC=CCCC(O)C1CCC(C(O)CCC(O)CCCCCCCC(O)CC2=CC(C)OC2=O)O1	0	0	0	0	0	0	0	0	0	0	0	0	0	0	0	0	0	0	0	0	0	0	0	0	0	0	0	0	0	0	0	1	0	0	0	0	0	0	0	0	0	0	0	0	0	0	0
1258	Coriandrone E	COc1c2c(cc3occc13)C(O)C(C)OC2=O	0	0	0	0	0	0	0	0	0	0	0	0	0	0	0	0	0	0	0	0	0	0	0	0	0	0	0	0	0	0	0	0	0	0	0	0	0	0	0	0	0	0	0	0	0	0	0
1259	Coriandrone D	COc1cc2c(c(O)c1CC(OC(C)=O)C(C)(C)O)C(=O)OC(C)C2	0	0	0	0	0	0	0	0	0	0	0	0	0	0	0	0	0	0	0	0	0	0	0	0	0	0	0	0	0	0	0	0	0	0	0	0	0	0	0	0	0	0	0	0	0	0	0
1260	Simonin I	CCCCCCCCCC(=O)OC1C(C)OC(OC2C(C)OC(OC3C(C)OC4OC5C(OC(CCCCC)CCCCCCCCCC(=O)OC4C3O)OC(C)C(O)C5O)C(OC(=O)CCCCCCCCC)C2O)C(OC(=O)C=Cc2ccccc2)C1O	0	0	0	0	0	0	0	0	0	0	0	0	0	0	0	0	0	0	0	0	0	0	0	0	0	0	0	0	0	0	0	1	0	0	0	0	0	0	0	0	0	0	0	0	0	0	0
1261	Simonin V	CCCCCCCCCCCC(=O)OC1C(C)OC(OC2C(C)OC(OC3C(C)OC4OC5C(OC(CCCCC)CCCCCCCCCC(=O)OC4C3O)OC(C)C(O)C5O)C(OC(=O)CCCCCCC)C2OC2OC(C)C(O)C(O)C2O)C(O)C1O	0	0	0	0	0	0	0	0	0	0	0	0	0	0	0	0	0	0	0	0	0	0	0	0	0	0	0	0	0	0	0	1	0	0	0	0	0	0	0	0	0	0	0	0	0	0	0
1262	Simonin II	CCCCCCCCCCCC(=O)OC1C(C)OC(OC2C(C)OC(OC3C(C)OC4OC5C(OC(CCCCC)CCCCCCCCCC(=O)OC4C3O)OC(CO)C(O)C5O)C(OC(=O)C(C)CC)C2OC2OC(C)C(O)C(O)C2O)C(O)C1O	0	0	0	0	0	0	0	0	0	0	0	0	0	0	0	0	0	0	0	0	0	0	0	0	0	0	0	0	0	0	0	1	0	0	0	0	0	0	0	0	0	0	0	0	0	0	0
1263	Simonin III	CCCCCCCCCCCC(=O)OC1C(C)OC(OC2C(C)OC(OC3C(C)OC4OC5C(OC(CCCCC)CCCCCCCCCC(=O)OC4C3O)OC(C)C(O)C5O)C(OC(=O)C(C)CC)C2OC2OC(C)C(O)C(O)C2O)C(O)C1O	0	0	0	0	0	0	0	0	0	0	0	0	0	0	0	0	0	0	0	0	0	0	0	0	0	0	0	0	0	0	0	1	0	0	0	0	0	0	0	0	0	0	0	0	0	0	0
1264	Simonin IV	CCCCCCCCCCCC(=O)OC1C(C)OC(OC2C(C)OC(OC3C(C)OC4OC5C(OC(CCCCC)CCCCCCCCCC(=O)OC4C3O)OC(C)C(O)C5O)C(OC(=O)CCCCCCCCC)C2OC2OC(C)C(O)C(O)C2O)C(O)C1O	0	0	0	0	0	0	0	0	0	0	0	0	0	0	0	0	0	0	0	0	0	0	0	0	0	0	0	0	0	0	0	1	0	0	0	0	0	0	0	0	0	0	0	0	0	0	0
1265	Avenoleic acid	CCCC(O)CC=CCC=CCCCCCCCC(=O)O	0	0	0	0	0	0	0	0	0	0	0	0	0	0	0	0	0	0	0	0	0	0	0	0	0	0	0	0	0	0	0	1	0	0	0	0	0	0	0	0	0	0	0	0	0	0	0
1266	2'-Hydroxy-3,4',5',7,8-pentamethoxyflavone	COc1cc(O)c(-c2oc3c(OC)c(OC)ccc3c(=O)c2OC)cc1OC	0	0	0	0	0	0	0	0	0	0	0	0	0	0	0	0	0	0	0	0	0	0	0	0	0	0	0	0	0	0	0	0	0	0	0	0	0	0	0	0	0	0	0	0	0	0	0
1267	Hexyl acetate	CCCCCCOC(C)=O	0	0	0	0	0	0	0	0	0	0	0	0	0	0	0	0	0	0	0	0	0	0	0	0	0	0	0	0	0	0	0	0	0	0	0	0	0	0	0	0	0	0	0	0	0	0	0
1268	1-Isomangostin	COc1c(O)cc2oc3cc(O)c4c(c3c(=O)c2c1CC=C(C)C)OC(C)(C)CC4	0	0	0	0	0	0	0	0	0	0	0	0	0	0	0	0	0	0	0	0	0	0	0	0	0	0	0	0	0	0	0	0	0	0	0	0	0	0	0	0	0	0	0	0	0	0	0
1269	Epomusenin A	CCCCCCCCCCCCC=CCCC1OC1CCCCCCCCCCCCCCC1=CC(C)OC1=O	0	0	0	0	0	0	0	0	0	0	0	0	0	0	0	0	0	0	0	0	0	0	0	0	0	0	0	0	0	0	0	1	0	0	0	0	1	0	0	0	0	0	0	0	0	0	0
1270	Epomusenin B	CCCCCCCCCCCCCCC=CCCC1OC1CCCCCCCCCCCCC1=CC(C)OC1=O	0	0	0	0	0	0	0	0	0	0	0	0	0	0	0	0	0	0	0	0	0	0	0	0	0	0	0	0	0	0	0	1	0	0	0	0	1	0	0	0	0	0	0	0	0	0	0
1271	1-Isomangostin hydrate	COc1c(O)cc2oc3cc(O)c4c(c3c(=O)c2c1CCC(C)(C)O)OC(C)(C)CC4	0	0	0	0	0	0	0	0	0	0	0	0	0	0	0	0	0	0	0	0	0	0	0	0	0	0	0	0	0	0	0	0	0	0	0	0	0	0	0	0	0	0	0	0	0	0	0
1272	13,15-Triacontanedione	CCCCCCCCCCCCCCCC(=O)CC(=O)CCCCCCCCCCCC	0	0	0	0	0	0	0	0	0	0	0	0	0	0	0	0	0	0	0	0	0	0	0	0	0	0	0	0	0	0	0	1	0	0	0	0	0	0	0	0	0	0	0	0	0	0	0
1273	2,3,4-Trimethyltriacontane	CCCCCCCCCCCCCCCCCCCCCCCCCCC(C)C(C)C(C)C	0	0	0	0	0	0	0	0	0	0	0	0	0	0	0	0	0	0	0	0	0	0	0	0	0	0	0	0	0	0	0	1	0	0	0	0	0	0	0	0	0	0	0	0	0	0	0
1274	2-O-Methylxylose	COC(C(O)C=O)C(O)CO	0	0	0	0	0	0	0	0	0	0	0	0	0	0	0	0	0	0	0	0	0	0	0	0	0	0	0	0	0	0	0	0	0	0	0	0	0	0	0	0	0	0	0	0	0	0	0
1275	(+)-11-Hydroxy-9-triacontanone	CCCCCCCCCCCCCCCCCCCC(O)CC(=O)CCCCCCCC	0	0	0	0	0	0	0	0	0	0	0	0	0	0	0	0	0	0	0	0	0	0	0	0	0	0	0	0	0	0	0	1	0	0	0	0	0	0	0	0	0	0	0	0	0	0	0
1276	Bis(2-furanylmethyl) disulfide	c1coc(CSSCc2ccco2)c1	0	0	0	0	0	0	0	0	0	0	0	0	0	0	0	0	0	0	0	0	0	0	0	0	0	0	0	0	0	0	0	0	0	0	1	0	0	0	0	0	0	0	0	0	0	0	0
1277	Dulciol B	C=CC(C)(C)c1cc(O)c2oc3c(CC=C(C)C)c(O)c(O)c(CC=C(C)C)c3c(=O)c2c1O	0	0	0	0	0	0	0	0	0	0	0	0	0	0	0	0	0	0	0	0	0	0	0	0	0	0	0	0	0	0	0	0	0	0	0	0	0	0	0	0	0	0	0	0	0	0	0
1278	Dulciol A	CC(C)=CCCC(C)=CCc1c(O)c(O)c(CC=C(C)C)c2c(=O)c3c(O)cc(O)cc3oc12	0	0	0	0	0	0	0	0	0	0	0	0	0	0	0	0	0	0	0	0	0	0	0	0	0	0	0	0	0	0	0	0	0	0	0	0	0	0	0	0	0	0	0	0	0	0	0
1279	Dulciol C	C=CC(C)(C)c1cc(O)c2oc3c(CC=C(C)C)c(O)c(O)c(CCC(C)(C)O)c3c(=O)c2c1O	0	0	0	0	0	0	0	0	0	0	0	0	0	0	0	0	0	0	0	0	0	0	0	0	0	0	0	0	0	0	0	0	0	0	0	0	0	0	0	0	0	0	0	0	0	0	0
1280	Tetrahydropentoxyline	O=C(O)C1Cc2c([nH]c3ccccc23)C(C(O)C(O)C(O)C(O)CO)N1	0	0	0	0	0	0	0	0	0	0	0	0	0	0	0	0	0	0	0	0	0	0	0	0	0	0	0	0	0	0	0	0	0	0	0	0	0	0	0	0	0	0	0	0	0	0	0
1281	2-Methyl-3-nonacosanone	CCCCCCCCCCCCCCCCCCCCCCCCCCC(=O)C(C)C	0	0	0	0	0	0	0	0	0	0	0	0	0	0	0	0	0	0	0	0	0	0	0	0	0	0	0	0	0	0	0	1	0	0	0	0	0	0	0	0	0	0	0	0	0	0	0
1282	25-Methyl-1-hexacosanol	CC(C)CCCCCCCCCCCCCCCCCCCCCCCCO	0	0	0	0	0	0	0	0	0	0	0	0	0	0	0	0	0	0	0	0	0	0	0	0	0	0	0	0	0	0	0	1	0	0	0	0	0	0	0	0	0	0	0	0	0	0	0
1283	15-Hentriacontanol	CCCCCCCCCCCCCCCCC(O)CCCCCCCCCCCCCC	0	0	0	0	0	0	0	0	0	0	0	0	0	0	0	0	0	0	0	0	0	0	0	0	0	0	0	0	0	0	0	1	0	0	0	0	0	0	0	0	0	0	0	0	0	0	0
1284	9-Hentriacontanone	CCCCCCCCCCCCCCCCCCCCCCC(=O)CCCCCCCC	0	0	0	0	0	0	0	0	0	0	0	0	0	0	0	0	0	0	0	0	0	0	0	0	0	0	0	0	0	0	0	1	0	0	0	0	0	0	0	0	0	0	0	0	0	0	0
1285	10,12-Heptacosanedione	CCCCCCCCCCCCCCCC(=O)CC(=O)CCCCCCCCC	0	0	0	0	0	0	0	0	0	0	0	0	0	0	0	0	0	0	0	0	0	0	0	0	0	0	0	0	0	0	0	1	0	0	0	0	0	0	0	0	0	0	0	0	0	0	0
1286	Glabrin A	CN1CC(O)C(O)CC1C(=O)O	0	0	0	0	0	0	0	0	0	0	0	0	0	0	0	0	0	0	0	0	0	0	0	0	0	0	0	0	0	0	0	0	0	0	0	0	0	0	0	0	0	0	0	0	0	0	0
1287	12-Hydroxy-8,10-octadecadienoic acid	CCCCCCC(O)C=CC=CCCCCCCC(=O)O	0	0	0	0	0	0	0	0	0	0	0	0	0	0	0	0	0	0	0	0	0	0	0	0	0	0	0	0	0	0	0	1	0	0	0	0	0	0	0	0	0	0	0	0	0	0	0
1288	Cycloartomunoxanthone	COc1cc(O)c2c3c1OC(C)(C)C3Cc1c-2oc2c3c(cc(O)c2c1=O)OC(C)(C)C=C3	0	0	0	0	0	0	0	0	0	0	0	0	0	0	0	0	0	0	0	0	0	0	0	0	0	0	0	0	0	0	0	0	0	0	0	0	0	0	0	0	0	0	0	0	0	0	0
1289	Bissulfine	CC(C=S=O)C(C)C=S=O	0	0	0	0	0	0	0	0	0	0	0	0	0	0	0	0	0	0	0	0	0	0	0	0	0	0	0	0	0	0	0	0	0	0	0	0	0	0	0	0	0	0	0	0	0	0	0
1290	2-Acetyl-3-methylpyrazine	CC(=O)c1nccnc1C	0	0	0	0	0	0	0	0	0	0	0	0	0	0	0	0	0	0	0	0	0	0	0	0	0	0	0	0	0	0	0	0	0	0	0	0	0	0	0	0	0	0	0	0	0	0	0
1291	Nopol	CC1(C)C2CC=C(CCO)C1C2	0	0	0	0	0	0	0	0	0	0	0	0	0	0	0	0	0	0	0	0	0	0	0	0	0	0	0	0	0	0	0	0	0	0	0	0	0	0	0	0	0	0	0	0	0	0	0
1292	(-)-Nopol	CC1(C)C2CC=C(CCO)C1C2	0	0	0	0	0	0	0	0	0	0	0	0	0	0	0	0	0	0	0	0	0	0	0	0	0	0	0	0	0	0	0	0	0	0	0	0	0	0	0	0	0	0	0	0	0	0	0
1293	(E)-3-Hexen-1-ol	CCC=CCCO	0	0	0	0	0	0	0	0	0	0	0	0	0	0	0	0	0	0	0	0	0	0	0	0	0	0	0	0	0	0	0	0	0	0	0	0	0	0	0	0	0	0	0	0	0	0	0
1294	Austalide B	COc1c2c(c(C)c3c1C(=O)OC3)OC1(C)CC(O)C34OC(OC)(CCC3(C)C1C2)OC4(C)C	0	0	0	0	0	0	0	0	0	0	0	0	0	0	0	0	0	0	0	0	0	0	0	0	0	0	0	0	0	0	0	0	0	0	0	0	0	0	0	0	0	0	0	0	0	0	0
1295	Austalide A	COc1c2c(c(C)c3c1C(=O)OC3)OC1(C)CC(OC(C)=O)C34OC(OC)(CCC3(C)C1C2)OC4(C)C	0	0	0	0	0	0	0	0	0	0	0	0	0	0	0	0	0	0	0	0	0	0	0	0	0	0	0	0	0	0	0	0	0	0	0	0	0	0	0	0	0	0	0	0	0	0	0
1296	2,2,7,7-Tetramethyl-1,6-dioxaspiro[4.4]non-3-ene	CC1(C)C=CC2(CCC(C)(C)O2)O1	0	0	0	0	0	0	0	0	0	0	0	0	0	0	0	0	0	0	0	0	0	0	0	0	0	0	0	0	0	0	0	0	0	0	0	0	0	0	0	0	0	0	0	0	0	0	0
1297	2,2,7,7-Tetramethyl-1,6-dioxaspiro[4.4]nona-3,8-diene	CC1(C)C=CC2(C=CC(C)(C)O2)O1	0	0	0	0	0	0	0	0	0	0	0	0	0	0	0	0	0	0	0	0	0	0	0	0	0	0	0	0	0	0	0	0	0	0	0	0	0	0	0	0	0	0	0	0	0	0	0
1298	gamma-Tocotrienol	CC(C)=CCCC(C)=CCCC(C)=CCCC1(C)CCc2cc(O)c(C)c(C)c2O1	0	0	0	0	0	0	0	0	0	0	0	0	0	0	0	0	0	0	0	0	0	0	0	0	0	0	0	0	0	0	0	0	0	0	0	0	0	0	0	0	0	0	0	0	0	0	0
1299	d-Tocotrienol	CC(C)=CCCC(C)=CCCC(C)=CCCC1(C)CCc2cc(O)cc(C)c2O1	0	0	0	0	0	0	0	0	0	0	0	0	0	0	0	0	0	0	0	0	0	0	0	0	0	0	0	0	0	0	0	0	0	0	0	0	0	0	0	0	0	0	0	0	0	0	0
1300	3,6-Dihydro-4-(4-methyl-3-pentenyl)-1,2-dithiin	CC(C)=CCCC1=CCSSC1	0	0	0	0	0	0	0	0	0	0	0	0	0	0	0	0	0	0	0	0	0	0	0	0	0	0	0	0	0	0	0	0	0	0	1	0	0	0	0	0	0	0	0	0	0	0	0
1301	Glucoconvallatoxoloside	CC1OC(OC2CCC3(CO)C4CCC5(C)C(C6=CC(=O)OC6)CCC5(O)C4CCC3(O)C2)C(O)C(O)C1OC1OC(CO)C(OC2OC(CO)C(O)C(O)C2O)C(O)C1O	0	0	0	0	0	0	0	0	0	0	0	0	0	0	0	0	0	0	0	0	0	0	0	0	0	0	0	0	0	0	0	0	0	0	0	0	0	0	0	0	0	0	0	0	0	0	0
1302	(1alpha,3beta,20S,22R,24S,25S)-Pubescenin	CC(C1CC2(C)OC2(C)C(=O)O1)C1CCC2C3CC=C4CC(OC5OC(CO)C(O)C(O)C5O)CC(O)C4(C)C3CCC12C	0	0	0	0	0	0	0	0	0	0	0	0	0	0	0	0	0	0	0	0	0	0	0	0	0	0	0	0	0	0	0	0	0	0	0	0	1	0	0	0	0	0	0	0	0	0	0
1303	Scutigeral	CC(C)=CCCC(C)=CCCC(C)=CCc1c(C)c(C=O)c(O)c(O)c1O	0	0	0	0	0	0	0	0	0	0	0	0	0	0	0	0	0	0	0	0	0	0	0	0	0	0	0	0	0	0	0	0	0	0	0	0	0	1	0	0	0	0	0	0	0	0	0
1304	alpha1-Sitosterol	CC=C(CCC(C)C1CCC2C3=CCC4C(C)C(O)CCC4(C)C3CCC21C)C(C)C	0	0	0	0	0	0	0	0	0	0	0	0	0	0	0	0	0	0	0	0	0	0	0	0	0	0	0	0	0	0	0	0	0	0	0	0	0	0	0	0	0	0	0	0	0	0	0
1305	Stigmastanol	CCC(CCC(C)C1CCC2C3CCC4CC(O)CCC4(C)C3CCC12C)C(C)C	0	0	0	0	0	0	0	0	0	0	0	0	0	0	0	0	0	0	0	0	0	0	0	0	0	0	0	0	0	0	0	0	0	0	0	0	0	0	0	0	0	0	0	0	0	0	0
1306	(3beta,5alpha,24S)-Stigmasta-7,25-dien-3-ol	C=C(C)C(CC)CCC(C)C1CCC2C3=CCC4CC(O)CCC4(C)C3CCC21C	0	0	0	0	0	0	0	0	0	0	0	0	0	0	0	0	0	0	0	0	0	0	0	0	0	0	0	0	0	0	0	0	0	0	0	0	0	0	0	0	0	0	0	0	0	0	0
1307	(3beta,5alpha,6beta,24R)-Stigmastane-3,5,6-triol	CCC(CCC(C)C1CCC2C3CC(O)C4(O)CC(O)CCC4(C)C3CCC12C)C(C)C	0	0	0	0	0	0	0	0	0	0	0	0	0	0	0	0	0	0	0	0	0	0	0	0	0	0	0	0	0	0	0	0	0	0	0	0	0	0	0	0	0	0	0	0	0	0	0
1308	7-Oxostigmasterol	CCC(C=CC(C)C1CCC2C3C(=O)C=C4CC(O)CCC4(C)C3CCC12C)C(C)C	0	0	0	0	0	0	0	0	0	0	0	0	0	0	0	0	0	0	0	0	0	0	0	0	0	0	0	0	0	0	0	0	0	0	0	0	0	0	0	0	0	0	0	0	0	0	0
1309	Valerenic acid	CC(=CC1CCC(C)C2CCC(C)=C12)C(=O)O	0	0	0	0	0	0	0	0	0	0	0	0	0	0	0	0	0	0	0	0	0	0	0	0	0	0	0	0	0	0	0	0	0	0	0	0	0	0	0	0	0	0	0	0	0	0	0
1310	Vitamin K2	CC(C)=CCCC(C)=CCCC(C)=CCCC(C)=CCCC(C)=CCCC(C)=CCC1=C(C)C(=O)c2ccccc2C1=O	0	0	0	0	0	0	0	0	0	0	0	0	0	0	0	0	0	0	0	0	0	0	0	0	0	0	0	0	0	0	0	0	0	0	0	0	0	0	0	0	0	0	0	0	0	0	0
1311	Elenolide	CC=C(C=O)C1CC(=O)OC=C1C(=O)OC	0	0	0	0	0	0	0	0	0	0	0	0	0	0	0	0	0	0	0	0	0	0	0	0	0	0	0	0	0	0	0	0	0	0	0	0	0	0	0	0	0	0	0	0	0	0	0
1312	4'-Methoxymucidin	COC=C(C(=O)OC)C(C)=CC=Cc1ccc(OC)cc1	0	0	0	0	0	0	0	0	0	0	0	0	0	0	0	0	0	0	0	0	0	0	0	0	0	0	0	0	0	0	0	0	0	0	0	0	0	0	0	0	0	0	0	0	0	0	0
1313	Withanolide B	CC1=C(C)C(=O)OC(C(C)C2CCC3C4C5OC5C5(O)CC=CC(=O)C5(C)C4CCC23C)C1	0	0	0	0	0	0	0	0	0	0	0	0	0	0	0	0	0	0	0	0	0	0	0	0	0	0	0	0	0	0	0	0	0	0	0	0	1	0	0	0	0	0	0	0	0	0	0
1314	Fucosterol	CC=C(CCC(C)C1CCC2C3CC=C4CC(O)CCC4(C)C3CCC12C)C(C)C	0	0	0	0	0	0	0	0	0	0	0	0	0	0	0	0	0	0	0	0	0	0	0	0	0	0	0	0	0	0	0	0	0	0	0	0	0	0	0	0	0	0	0	0	0	0	0
1315	Isofucosterol	CC=C(CCC(C)C1CCC2C3CC=C4CC(O)CCC4(C)C3CCC12C)C(C)C	0	0	0	0	0	0	0	0	0	0	0	0	0	0	0	0	0	0	0	0	0	0	0	0	0	0	0	0	0	0	0	0	0	0	0	0	0	0	0	0	0	0	0	0	0	0	0
1316	Ikshusterol	CCC(CCC(C)C1CCC2C3C(O)C=C4CC(O)CCC4(C)C3CCC12C)C(C)C	0	0	0	0	0	0	0	0	0	0	0	0	0	0	0	0	0	0	0	0	0	0	0	0	0	0	0	0	0	0	0	0	0	0	0	0	0	0	0	0	0	0	0	0	0	0	0
1317	7-Epiikshusterol	CCC(CCC(C)C1CCC2C3C(O)C=C4CC(O)CCC4(C)C3CCC12C)C(C)C	0	0	0	0	0	0	0	0	0	0	0	0	0	0	0	0	0	0	0	0	0	0	0	0	0	0	0	0	0	0	0	0	0	0	0	0	0	0	0	0	0	0	0	0	0	0	0
1318	Angeolide	CCCC=C1OC(=O)C2=CC3CCC12C1(OC(=O)C2=C1CCC=C2)C3CCC	0	0	0	0	0	0	0	0	0	0	0	0	0	0	0	0	0	0	0	0	0	0	0	0	0	0	0	0	0	0	0	0	0	0	0	0	0	0	0	0	0	0	0	0	0	0	0
1319	Neogitogenin	CC1CCC2(OC1)OC1CC3C4CCC5CC(O)C(O)CC5(C)C4CCC3(C)C1C2C	0	0	0	0	0	0	0	0	0	0	0	0	0	0	0	0	0	0	0	0	0	0	0	0	0	0	0	0	0	0	0	0	0	0	0	0	0	0	0	0	0	0	0	0	0	0	0
1320	Sarsasapogenin	CC1CCC2(OC1)OC1CC3C4CCC5CC(O)CCC5(C)C4CCC3(C)C1C2C	0	0	0	0	0	0	0	0	0	0	0	0	0	0	0	0	0	0	0	0	0	0	0	0	0	0	0	0	0	0	0	0	0	0	0	0	0	0	0	0	0	0	0	0	0	0	0
1321	1-Mercapto-2-propanone	CC(=O)CS	0	0	0	0	0	0	0	0	0	0	0	0	0	0	0	0	0	0	0	0	0	0	0	0	0	0	0	0	0	0	0	0	0	0	0	1	0	0	0	0	0	0	0	0	0	0	0
1322	Isohumulone A	CC(C)=CCC(=O)C1(O)C(O)=C(C(=O)CC(C)C)C(=O)C1CC=C(C)C	0	0	0	0	0	0	0	0	0	0	0	0	0	0	0	0	0	0	0	0	0	0	0	0	0	0	0	0	0	0	0	0	0	0	0	0	0	0	0	0	0	0	0	0	0	0	0
1323	Isohumulone B	CC(C)=CCC(=O)C1(O)C(O)=C(C(=O)CC(C)C)C(=O)C1CC=C(C)C	0	0	0	0	0	0	0	0	0	0	0	0	0	0	0	0	0	0	0	0	0	0	0	0	0	0	0	0	0	0	0	0	0	0	0	0	0	0	0	0	0	0	0	0	0	0	0
1324	3-Methylbutanoic acid	CC(C)CC(=O)O	0	0	0	0	0	0	0	0	0	0	0	0	0	0	0	0	0	0	0	0	0	0	0	0	0	0	0	0	0	0	0	0	0	0	0	0	0	0	0	0	0	0	0	0	0	0	0
1325	Methyl 3-methylbutanoate	COC(=O)CC(C)C	0	0	0	0	0	0	0	0	0	0	0	0	0	0	0	0	0	0	0	0	0	0	0	0	0	0	0	0	0	0	0	0	0	0	0	0	0	0	0	0	0	0	0	0	0	0	0
1326	Ethyl isovalerate	CCOC(=O)CC(C)C	0	0	0	0	0	0	0	0	0	0	0	0	0	0	0	0	0	0	0	0	0	0	0	0	0	0	0	0	0	0	0	0	0	0	0	0	0	0	0	0	0	0	0	0	0	0	0
1327	Isopentyl isopentanoate	CC(C)CCOC(=O)CC(C)C	0	0	0	0	0	0	0	0	0	0	0	0	0	0	0	0	0	0	0	0	0	0	0	0	0	0	0	0	0	0	0	0	0	0	0	0	0	0	0	0	0	0	0	0	0	0	0
1328	(Ã¥Â±)-Sulcatol	CC(C)=CCCC(C)O	0	0	0	0	0	0	0	0	0	0	0	0	0	0	0	0	0	0	0	0	0	0	0	0	0	0	0	0	0	0	0	0	0	0	0	0	0	0	0	0	0	0	0	0	0	0	0
1329	(Ã¥Â±)-6-Methyl-5-hepten-2-yl acetate	CC(=O)OC(C)CCC=C(C)C	0	0	0	0	0	0	0	0	0	0	0	0	0	0	0	0	0	0	0	0	0	0	0	0	0	0	0	0	0	0	0	0	0	0	0	0	0	0	0	0	0	0	0	0	0	0	0
1330	Euglobal Ia1	CC(C)CC1c2c(O)c(C=O)c(O)c(C=O)c2OC2(C)C=CC(C(C)C)CC12	0	0	0	0	0	0	0	0	0	0	0	0	0	0	0	0	0	0	0	0	0	0	0	0	0	0	0	0	0	0	0	0	0	0	0	0	0	0	0	0	0	0	0	0	0	0	0
1331	Euglobal Ia2	CC(C)CC1c2c(O)c(C=O)c(O)c(C=O)c2OC2(C)C=CC(C(C)C)CC12	0	0	0	0	0	0	0	0	0	0	0	0	0	0	0	0	0	0	0	0	0	0	0	0	0	0	0	0	0	0	0	0	0	0	0	0	0	0	0	0	0	0	0	0	0	0	0
1332	Euglobal Ib	CC(C)CC1CC2(CCC3(C(C)C)CC23)Oc2c(C=O)c(O)c(C=O)c(O)c21	0	0	0	0	0	0	0	0	0	0	0	0	0	0	0	0	0	0	0	0	0	0	0	0	0	0	0	0	0	0	0	0	0	0	0	0	0	0	0	0	0	0	0	0	0	0	0
1333	Euglobal Ic	CC(C)CC1CC2(CCC3(C(C)C)CC23)Oc2c(C=O)c(O)c(C=O)c(O)c21	0	0	0	0	0	0	0	0	0	0	0	0	0	0	0	0	0	0	0	0	0	0	0	0	0	0	0	0	0	0	0	0	0	0	0	0	0	0	0	0	0	0	0	0	0	0	0
1334	Euglobal IIa	CC(C)CC1CC2(CCC3(C(C)C)CC23)Oc2c(C=O)c(O)c(C=O)c(O)c21	0	0	0	0	0	0	0	0	0	0	0	0	0	0	0	0	0	0	0	0	0	0	0	0	0	0	0	0	0	0	0	0	0	0	0	0	0	0	0	0	0	0	0	0	0	0	0
1335	Euglobal IIb	CC(C)CC1CC2(C=CC(C(C)C)CC2)Oc2c(C=O)c(O)c(C=O)c(O)c21	0	0	0	0	0	0	0	0	0	0	0	0	0	0	0	0	0	0	0	0	0	0	0	0	0	0	0	0	0	0	0	0	0	0	0	0	0	0	0	0	0	0	0	0	0	0	0
1336	Euglobal IVa	CC1=CCCC2(C)Oc3c(C=O)c(O)c(C=O)c(O)c3C(CC(C)C)C2C2C(CC1)C2(C)C	0	0	0	0	0	0	0	0	0	0	0	0	0	0	0	0	0	0	0	0	0	0	0	0	0	0	0	0	0	0	0	0	0	0	0	0	0	0	0	0	0	0	0	0	0	0	0
1337	Euglobal IIc	CC(C)CC(=O)c1c(O)c(C=O)c2c(c1O)CC1CC(C(C)C)C=CC1(C)O2	0	0	0	0	0	0	0	0	0	0	0	0	0	0	0	0	0	0	0	0	0	0	0	0	0	0	0	0	0	0	0	0	0	0	0	0	0	0	0	0	0	0	0	0	0	0	0
1338	Euglobal IVb	CC1=CCCC2(C)Oc3c(C=O)c(O)c(C=O)c(O)c3C(CC(C)C)C2C2C(CC1)C2(C)C	0	0	0	0	0	0	0	0	0	0	0	0	0	0	0	0	0	0	0	0	0	0	0	0	0	0	0	0	0	0	0	0	0	0	0	0	0	0	0	0	0	0	0	0	0	0	0
1339	Euglobal VII	CC1=CCCC2(C)Cc3c(O)c(C(=O)CC(C)C)c(O)c(C=O)c3OC2C2C(CC1)C2(C)C	0	0	0	0	0	0	0	0	0	0	0	0	0	0	0	0	0	0	0	0	0	0	0	0	0	0	0	0	0	0	0	0	0	0	0	0	0	0	0	0	0	0	0	0	0	0	0
1340	Euglobal V	CC(C)CC1c2c(O)c(C=O)c(O)c(C=O)c2OC23CCC1(C)C2C1C(CCC3C)C1(C)C	0	0	0	0	0	0	0	0	0	0	0	0	0	0	0	0	0	0	0	0	0	0	0	0	0	0	0	0	0	0	0	0	0	0	0	0	0	0	0	0	0	0	0	0	0	0	0
1341	Jasmolone	CCC=CCC1=C(C)C(O)CC1=O	0	0	0	0	0	0	0	0	0	0	0	0	0	0	0	0	0	0	0	0	0	0	0	0	0	0	0	0	0	0	0	0	0	0	0	0	0	0	0	0	0	0	0	0	0	0	0
1342	Melongoside O	CC(CCC1(O)OC2CC3C4CC=C5CC(OC6OC(CO)C(O)C(OC7OC(CO)C(O)C(O)C7O)C6O)CCC5(C)C4CCC3(C)C2C1C)COC1OC(CO)C(O)C(O)C1O	0	0	0	0	0	0	0	0	0	0	0	0	0	0	0	0	0	0	0	0	0	0	0	0	0	0	0	0	0	0	0	0	0	0	0	0	0	0	0	0	0	0	0	0	0	0	0
1343	Lupulone	CC(C)=CCC1C(=O)C(C(=O)CC(C)C)=C(O)C(CC=C(C)C)(CC=C(C)C)C1=O	0	0	0	0	0	0	0	0	0	0	0	0	0	0	0	0	0	0	0	0	0	0	0	0	0	0	0	0	0	0	0	0	0	0	0	0	0	0	0	0	0	0	0	0	0	0	0
1344	Hydroxycitronellol	CC(CCO)CCCC(C)(C)O	0	0	0	0	0	0	0	0	0	0	0	0	0	0	0	0	0	0	0	0	0	0	0	0	0	0	0	0	0	0	0	0	0	0	0	0	0	0	0	0	0	0	0	0	0	0	0
1345	Ginkgolide M	CC1C(=O)OC2C1C13OC4OC(=O)C(O)C45C(C(C)(C)C)C(O)C(OC1=O)C35C2O	0	0	0	0	0	0	0	0	0	0	0	0	0	0	0	0	0	0	0	0	0	0	0	0	0	0	0	0	0	0	0	0	0	0	0	0	0	0	0	0	0	0	0	0	0	0	0
1346	Isoaustin	C=C1C2(C)CC3=C(C)C4(C=CC(=O)OC4(C)C)C(OC(C)=O)CC3(C)C13C(=O)OC(C)C3(O)C(=O)O2	0	0	0	0	0	0	0	0	0	0	0	0	0	0	0	0	0	0	0	0	0	0	0	0	0	0	0	0	0	0	0	0	0	0	0	0	0	0	0	0	0	0	0	0	0	0	0
1347	Neriantogenin	CC12CCC3C(CCC4CC(O)CCC43C)C1C(O)C=C2C1=CC(=O)OC1	0	0	0	0	0	0	0	0	0	0	0	0	0	0	0	0	0	0	0	0	0	0	0	0	0	0	0	0	0	0	0	0	0	0	0	0	0	0	0	0	0	0	0	0	0	0	0
1348	Isohumulinone A	CC(C)=C1CC2(O)C(CC3(O)C(=O)C(C(=O)CC(C)C)=C(O)C32O)C1(C)C	0	0	0	0	0	0	0	0	0	0	0	0	0	0	0	0	0	0	0	0	0	0	0	0	0	0	0	0	0	0	0	0	0	0	0	0	0	0	0	0	0	0	0	0	0	0	0
1349	Isohumulinone B	CC(C)=C1CC2(O)C(CC3(O)C(=O)C(C(=O)CC(C)C)=C(O)C32O)C1(C)C	0	0	0	0	0	0	0	0	0	0	0	0	0	0	0	0	0	0	0	0	0	0	0	0	0	0	0	0	0	0	0	0	0	0	0	0	0	0	0	0	0	0	0	0	0	0	0
1350	Asparagoside A	CC1CCC2(OC1)OC1CC3C4CCC5CC(OC6OC(CO)C(O)C(O)C6O)CCC5(C)C4CCC3(C)C1C2C	0	0	0	0	0	0	0	0	0	0	0	0	0	0	0	0	0	0	0	0	0	0	0	0	0	0	0	0	0	0	0	0	0	0	0	0	0	0	0	0	0	0	0	0	0	0	0
1351	Gitonin	CC1CCC2(OC1)OC1CC3C4CCC5CC(OC6OC(CO)C(OC7OC(CO)C(O)C(OC8OCC(O)C(O)C8O)C7OC7OC(CO)C(O)C(O)C7O)C(O)C6O)C(O)CC5(C)C4CCC3(C)C1C2C	0	0	0	0	0	0	0	0	0	0	0	0	0	0	0	0	0	0	0	0	0	0	0	0	0	0	0	0	0	0	0	0	0	0	0	0	0	0	0	0	0	0	0	0	0	0	0
1352	Neotigogenin	CC1CCC2(OC1)OC1CC3C4CCC5CC(O)CCC5(C)C4CCC3(C)C1C2C	0	0	0	0	0	0	0	0	0	0	0	0	0	0	0	0	0	0	0	0	0	0	0	0	0	0	0	0	0	0	0	0	0	0	0	0	0	0	0	0	0	0	0	0	0	0	0
1353	Uttronin A	CC1CCC2(OC1)OC1CC3C4CCC5CC(OC6OC(CO)C(OC7OC(CO)C(O)C(OC8OCC(O)C(O)C8O)C7OC7OC(CO)C(O)C(O)C7O)C(O)C6O)CCC5(C)C4CCC3(C)C1C2C	0	0	0	0	0	0	0	0	0	0	0	0	0	0	0	0	0	0	0	0	0	0	0	0	0	0	0	0	0	0	0	0	0	0	0	0	0	0	0	0	0	0	0	0	0	0	0
1354	Smilagenin	CC1CCC2(OC1)OC1CC3C4CCC5CC(O)CCC5(C)C4CCC3(C)C1C2C	0	0	0	0	0	0	0	0	0	0	0	0	0	0	0	0	0	0	0	0	0	0	0	0	0	0	0	0	0	0	0	0	0	0	0	0	0	0	0	0	0	0	0	0	0	0	0
1355	Dexamethasone	CC1CC2C3CCC4=CC(=O)C=CC4(C)C3(F)C(O)CC2(C)C1(O)C(=O)CO	0	0	0	0	0	0	0	0	0	0	0	0	0	0	0	0	0	0	0	0	0	0	0	0	0	0	0	0	0	0	0	0	0	0	0	0	0	0	0	0	0	0	0	0	0	0	0
1356	Melongoside P	CC(CCC1(O)OC2CC3C4CCC5CC(OC6OC(CO)C(O)C(OC7OC(C)C(O)C(O)C7O)C6OC6OC(CO)C(O)C(O)C6O)CCC5(C)C4CCC3(C)C2C1C)COC1OC(CO)C(O)C(O)C1O	0	0	0	0	0	0	0	0	0	0	0	0	0	0	0	0	0	0	0	0	0	0	0	0	0	0	0	0	0	0	0	0	0	0	0	0	0	0	0	0	0	0	0	0	0	0	0
1357	Asparagoside H	CC(CCC1(O)OC2CC3C4CCC5CC(OC6OC(CO)C(OC7OC(CO)C(OC8OCC(O)C(O)C8O)C(O)C7O)C(OC7OC(CO)C(O)C(O)C7O)C6O)CCC5(C)C4CCC3(C)C2C1C)COC1OC(CO)C(O)C(O)C1O	0	0	0	0	0	0	0	0	0	0	0	0	0	0	0	0	0	0	0	0	0	0	0	0	0	0	0	0	0	0	0	0	0	0	0	0	0	0	0	0	0	0	0	0	0	0	0
1358	Butyl propionate	CCCCOC(=O)CC	0	0	0	0	0	0	0	0	0	0	0	0	0	0	0	0	0	0	0	0	0	0	0	0	0	0	0	0	0	0	0	0	0	0	0	0	0	0	0	0	0	0	0	0	0	0	0
1359	Neogrifolin	CC(C)=CCCC(C)=CCCC(C)=CCc1c(C)cc(O)cc1O	0	0	0	0	0	0	0	0	0	0	0	0	0	0	0	0	0	0	0	0	0	0	0	0	0	0	0	0	0	0	0	0	0	0	0	0	0	0	0	0	0	0	0	0	0	0	0
1360	Amasterol	C=C(CCC(C)(O)C1CCC2C3=CC=C4CC(O)CCC4(C)C3CCC21C)C(C)C	0	0	0	0	0	0	0	0	0	0	0	0	0	0	0	0	0	0	0	0	0	0	0	0	0	0	0	0	0	0	0	0	0	0	0	0	0	0	0	0	0	0	0	0	0	0	0
1361	Ostreasterol	C=C(CCC(C)C1CCC2C3CC=C4CC(O)CCC4(C)C3CCC12C)C(C)C	0	0	0	0	0	0	0	0	0	0	0	0	0	0	0	0	0	0	0	0	0	0	0	0	0	0	0	0	0	0	0	0	0	0	0	0	0	0	0	0	0	0	0	0	0	0	0
1362	Taraxacoside	O=C1CC(OC2OC(CO)C(OC(=O)Cc3ccc(O)cc3)C(O)C2O)CO1	0	0	0	0	0	0	0	0	0	0	0	0	0	0	0	0	0	0	0	0	0	0	0	0	0	0	0	0	0	0	0	0	0	0	0	0	0	0	0	0	0	0	0	0	0	0	0
1363	Isopropyl propionate	CCC(=O)OC(C)C	0	0	0	0	0	0	0	0	0	0	0	0	0	0	0	0	0	0	0	0	0	0	0	0	0	0	0	0	0	0	0	0	0	0	0	0	0	0	0	0	0	0	0	0	0	0	0
1364	Boviquinone 4	CC(C)=CCCC(C)=CCCC(C)=CCCC(C)=CCC1=C(O)C(=O)C=C(O)C1=O	0	0	0	0	0	0	0	0	0	0	0	0	0	0	0	0	0	0	0	0	0	0	0	0	0	0	0	0	0	0	0	0	0	0	0	0	0	0	0	0	0	0	0	0	0	0	0
1365	1H-Indole-3-acetonitrile	N#CCc1c[nH]c2ccccc12	0	0	0	0	0	0	0	0	0	0	0	0	0	0	0	0	0	0	0	0	0	0	0	0	0	0	0	0	0	0	0	0	0	0	0	0	0	0	0	0	0	0	0	0	0	0	0
1366	Ethyl propionate	CCOC(=O)CC	0	0	0	0	0	0	0	0	0	0	0	0	0	0	0	0	0	0	0	0	0	0	0	0	0	0	0	0	0	0	0	0	0	0	0	0	0	0	0	0	0	0	0	0	0	0	0
1367	Propyl propionate	CCCOC(=O)CC	0	0	0	0	0	0	0	0	0	0	0	0	0	0	0	0	0	0	0	0	0	0	0	0	0	0	0	0	0	0	0	0	0	0	0	0	0	0	0	0	0	0	0	0	0	0	0
1368	Methyl 3-phenylpropanoate	COC(=O)CCc1ccccc1	0	0	0	0	0	0	0	0	0	0	0	0	0	0	0	0	0	0	0	0	0	0	0	0	0	0	0	0	0	0	0	0	0	0	0	0	0	0	0	0	0	0	0	0	0	0	0
1369	1,1-Dimethoxyethane	COC(C)OC	0	0	0	0	0	0	0	0	0	0	0	0	0	0	0	0	0	0	0	0	0	0	0	0	0	0	0	0	0	0	0	0	0	0	0	0	0	0	0	0	0	0	0	0	0	0	0
1370	Methyl propionate	CCC(=O)OC	0	0	0	0	0	0	0	0	0	0	0	0	0	0	0	0	0	0	0	0	0	0	0	0	0	0	0	0	0	0	0	0	0	0	0	0	0	0	0	0	0	0	0	0	0	0	0
1371	Benzyl propionate	CCC(=O)OCc1ccccc1	0	0	0	0	0	0	0	0	0	0	0	0	0	0	0	0	0	0	0	0	0	0	0	0	0	0	0	0	0	0	0	0	0	0	0	0	0	0	0	0	0	0	0	0	0	0	0
1372	2-Hydroxy-2-methylbutanedioic acid	CC(O)(CC(=O)O)C(=O)O	0	0	0	0	0	0	0	0	0	0	0	0	0	0	0	0	0	0	0	0	0	0	0	0	0	0	0	0	0	0	0	0	0	0	0	0	0	0	0	0	0	0	0	0	0	0	0
1373	Cohulupone	CC(C)=CCC1(CC=C(C)C)C(=O)C(=O)C(C(=O)C(C)C)C1=O	0	0	0	0	0	0	0	0	0	0	0	0	0	0	0	0	0	0	0	0	0	0	0	0	0	0	0	0	0	0	0	0	0	0	0	0	0	0	0	0	0	0	0	0	0	0	0
1374	Colupulone	CC(C)=CCC1=C(O)C(CC=C(C)C)(CC=C(C)C)C(=O)C(C(=O)C(C)C)C1=O	0	0	0	0	0	0	0	0	0	0	0	0	0	0	0	0	0	0	0	0	0	0	0	0	0	0	0	0	0	0	0	0	0	0	0	0	0	0	0	0	0	0	0	0	0	0	0
1375	Australigenin	C=C1CCC2(OC1)OC1CC3C4CCC5CC(O)CC(O)C5(C)C4CCC3(C)C1C2C	0	0	0	0	0	0	0	0	0	0	0	0	0	0	0	0	0	0	0	0	0	0	0	0	0	0	0	0	0	0	0	0	0	0	0	0	0	0	0	0	0	0	0	0	0	0	0
1376	Convallamarogenin	C=C1CCC2(OC1)OC1CC3C4CCC5CC(O)CC(O)C5(C)C4CCC3(C)C1C2C	0	0	0	0	0	0	0	0	0	0	0	0	0	0	0	0	0	0	0	0	0	0	0	0	0	0	0	0	0	0	0	0	0	0	0	0	0	0	0	0	0	0	0	0	0	0	0
1377	Convallamaroside	C=C(CCC1(O)OC2CC3C4CCC5CC(OC6OC(C)C(OC7OC(CO)C(O)C(O)C7O)C(O)C6O)CC(OC6OC(C)C(O)C(O)C6OC6OC(C)C(O)C(O)C6O)C5(C)C4CCC3(C)C2C1C)COC1OC(CO)C(O)C(O)C1O	0	0	0	0	0	0	0	0	0	0	0	0	0	0	0	0	0	0	0	0	0	0	0	0	0	0	0	0	0	0	0	0	0	0	0	0	0	0	0	0	0	0	0	0	0	0	0
1378	Dimoracin	CC1=CC2c3c(O)cc(-c4cc5ccc(O)cc5o4)cc3OC(c3c(O)cc(-c4cc5ccc(O)cc5o4)cc3O)C2C(C)(C)C1	0	0	0	0	0	0	0	0	0	0	0	0	0	0	0	0	0	0	0	0	0	0	0	0	0	0	0	0	0	0	0	0	0	0	0	0	0	0	0	0	0	0	0	0	0	0	0
1379	Chalcomoracin	CC(C)=CCc1c(O)ccc(C(=O)C2C(c3c(O)cc(-c4cc5ccc(O)cc5o4)cc3O)C=C(C)CC2c2ccc(O)cc2O)c1O	0	0	0	0	0	0	0	0	0	0	0	0	0	0	0	0	0	0	0	0	0	0	0	0	0	0	0	0	0	0	0	0	0	0	0	0	0	0	0	0	0	0	0	0	0	0	0
1380	(S)-3-Octanol	CCCCCC(O)CC	0	0	0	0	0	0	0	0	0	0	0	0	0	0	0	0	0	0	0	0	0	0	0	0	0	0	0	0	0	0	0	0	0	0	0	0	0	0	0	0	0	0	0	0	0	0	0
1381	Albafuran A	CC(C)=CCCC(C)=CCc1c(O)cc(O)cc1-c1cc2ccc(O)cc2o1	0	0	0	0	0	0	0	0	0	0	0	0	0	0	0	0	0	0	0	0	0	0	0	0	0	0	0	0	0	0	0	0	0	0	0	0	0	0	0	0	0	0	0	0	0	0	0
1382	Albafuran B	CC(C)=CCCC(C)=CCc1c(O)cc(-c2cc3ccc(O)cc3o2)cc1O	0	0	0	0	0	0	0	0	0	0	0	0	0	0	0	0	0	0	0	0	0	0	0	0	0	0	0	0	0	0	0	0	0	0	0	0	0	0	0	0	0	0	0	0	0	0	0
1383	Albafuran C	CC1=CC(c2cc3cc(-c4cc(O)cc(O)c4)oc3cc2O)C(C(=O)c2ccc(O)cc2O)C(c2ccc(O)cc2O)C1	0	0	0	0	0	0	0	0	0	0	0	0	0	0	0	0	0	0	0	0	0	0	0	0	0	0	0	0	0	0	0	0	0	0	0	0	0	0	0	0	0	0	0	0	0	0	0
1384	Albanin F	CC(C)=CCc1c(-c2ccc(O)cc2O)oc2c(C3C=C(C)CC(c4ccc(O)cc4O)C3C(=O)c3ccc(O)cc3O)c(O)cc(O)c2c1=O	0	0	0	0	0	0	0	0	0	0	0	0	0	0	0	0	0	0	0	0	0	0	0	0	0	0	0	0	0	0	0	0	0	0	0	0	0	0	0	0	0	0	0	0	0	0	0
1385	Albanin G	CC(C)=CCc1c(O)ccc(C(=O)C2C(c3c(O)cc(O)c4c(=O)c(CC=C(C)C)c(-c5ccc(O)cc5O)oc34)C=C(C)CC2c2ccc(O)cc2O)c1O	0	0	0	0	0	0	0	0	0	0	0	0	0	0	0	0	0	0	0	0	0	0	0	0	0	0	0	0	0	0	0	0	0	0	0	0	0	0	0	0	0	0	0	0	0	0	0
1386	Cheirotoxol	CC1OC(OC2CCC3(CO)C4CCC5(C)C(C6=CC(=O)OC6)CCC5(O)C4CCC3(O)C2)C(O)C(O)C1OC1OC(CO)C(O)C(O)C1O	0	0	0	0	0	0	0	0	0	0	0	0	0	0	0	0	0	0	0	0	0	0	0	0	0	0	0	0	0	0	0	0	0	0	0	0	0	0	0	0	0	0	0	0	0	0	0
1387	(3beta,4alpha,5alpha)-4-Methyl-8(14)-cholesten-3-ol	CC(C)CCCC(C)C1CCC2=C3CCC4C(C)C(O)CCC4(C)C3CCC21C	0	0	0	0	0	0	0	0	0	0	0	0	0	0	0	0	0	0	0	0	0	0	0	0	0	0	0	0	0	0	0	0	0	0	0	0	0	0	0	0	0	0	0	0	0	0	0
1388	25-Methyl-24-methylenecholesterol	C=C(CCC(C)C1CCC2C3CC=C4CC(O)CCC4(C)C3CCC12C)C(C)(C)C	0	0	0	0	0	0	0	0	0	0	0	0	0	0	0	0	0	0	0	0	0	0	0	0	0	0	0	0	0	0	0	0	0	0	0	0	0	0	0	0	0	0	0	0	0	0	0
1389	4,14-Dimethylergosta-8,25-dien-3-ol	C=C(C)C(C)CCC(C)C1CCC2(C)C3=C(CCC12C)C1(C)CCC(O)C(C)C1CC3	0	0	0	0	0	0	0	0	0	0	0	0	0	0	0	0	0	0	0	0	0	0	0	0	0	0	0	0	0	0	0	0	0	0	0	0	0	0	0	0	0	0	0	0	0	0	0
1390	Biflorin	Cc1cc(=O)c2c(O)c(C3OC(CO)C(O)C(O)C3O)c(O)cc2o1	0	0	0	0	0	0	0	0	0	0	0	0	0	0	0	0	0	0	0	0	0	0	0	0	0	0	0	0	0	0	0	0	0	0	0	0	0	0	0	0	0	0	0	0	0	0	0
1391	Wampetin	CC(=CCOc1c2occc2cc2ccc(=O)oc12)CC1C=C(C)C(=O)O1	0	0	0	0	0	0	0	0	0	0	0	0	0	0	0	0	0	0	0	0	0	0	0	0	0	0	0	0	0	0	0	0	0	0	0	0	0	0	0	0	0	0	0	0	0	0	0
1392	Carissanol	COc1cc(CC2COC(O)C2(O)Cc2ccc(O)c(OC)c2)ccc1O	0	0	0	0	0	0	0	0	0	0	0	0	0	0	0	0	0	0	0	0	0	0	0	0	0	0	0	0	0	0	0	0	0	0	0	0	0	0	0	0	0	0	0	0	0	0	0
1393	5-(2,3-Dihydroxy-3-methylbutyl)-4-(3,4-epoxy-4-methylpentanoyl)-3,4-dihydroxy-2-isopentanoyl-2-cyclopenten-1-one	CC(C)CC(=O)C1=C(O)C(O)(C(=O)CC2OC2(C)C)C(CC(O)C(C)(C)O)C1=O	0	0	0	0	0	0	0	0	0	0	0	0	0	0	0	0	0	0	0	0	0	0	0	0	0	0	0	0	0	0	0	0	0	0	0	0	1	0	0	0	0	0	0	0	0	0	0
1394	(Ã¥Â±)-Hydroxycitronellol	CC(CCO)CCCC(C)(C)O	0	0	0	0	0	0	0	0	0	0	0	0	0	0	0	0	0	0	0	0	0	0	0	0	0	0	0	0	0	0	0	0	0	0	0	0	0	0	0	0	0	0	0	0	0	0	0
1395	Diosbulbinoside D	CC12CC(c3ccoc3)OC(=O)C1CC(OC1OC(CO)C(O)C(O)C1O)=C1C3CC(CC12)OC3=O	0	0	0	0	0	0	0	0	0	0	0	0	0	0	0	0	0	0	0	0	0	0	0	0	0	0	0	0	0	0	0	0	0	0	0	0	0	0	0	0	0	0	0	0	0	0	0
1396	Pubescenol	CC(C1CC2(C)OC2(C)C(=O)O1)C1CCC2C3C(O)CC4C(O)CCC(=O)C4(C)C3CCC12C	0	0	0	0	0	0	0	0	0	0	0	0	0	0	0	0	0	0	0	0	0	0	0	0	0	0	0	0	0	0	0	0	0	0	0	0	1	0	0	0	0	0	0	0	0	0	0
1397	Synephrine	CNCC(O)c1ccc(O)cc1	0	0	0	0	0	0	0	0	0	0	0	0	0	0	0	0	0	0	0	0	0	0	0	0	0	0	0	0	0	0	0	0	0	0	0	0	0	0	0	0	0	0	0	0	0	0	0
1398	Shikimic acid 3-phosphate	O=C(O)C1=CC(OP(=O)(O)O)C(O)C(O)C1	0	0	0	0	0	0	0	0	0	0	0	0	0	0	0	0	0	0	0	0	0	0	0	0	0	0	0	0	0	0	0	0	0	0	0	0	0	0	0	0	0	0	0	0	0	0	0
1399	Gibberellin A84	C=C1CC23CC1CC(O)C2C12CCCC(C)(C(=O)O1)C2C3C(=O)O	0	0	0	0	0	0	0	0	0	0	0	0	0	0	0	0	0	0	0	0	0	0	0	0	0	0	0	0	0	0	0	0	0	0	0	0	0	0	0	0	0	0	0	0	0	0	0
1400	Dihydrozeatin	CC(CO)CCNc1ncnc2nc[nH]c12	0	0	0	0	0	0	0	0	0	0	0	0	0	0	0	0	0	0	0	0	0	0	0	0	0	0	0	0	0	0	0	0	0	0	0	0	0	0	0	0	0	0	0	0	0	0	0
1401	2-Methylthio-N6-(delta2-isopentenyl)adenosine	CSc1nc(NCC=C(C)C)c2ncn(C3OC(CO)C(O)C3O)c2n1	0	0	0	0	0	0	0	0	0	0	0	0	0	0	0	0	0	0	0	0	0	0	0	0	0	0	0	0	0	0	0	0	0	0	0	0	0	0	0	0	0	0	0	0	0	0	0
1402	2-Methylthioribosyl-trans-zeatin	Cc1cccc(Nc2cc(Cl)nc(SCC(=O)O)n2)c1C	0	0	0	0	0	0	0	0	0	0	0	0	0	0	0	0	0	0	0	0	0	0	0	0	0	0	0	0	0	0	0	0	0	0	0	0	0	0	0	0	0	0	0	0	0	0	0
1403	5-Hydroxyindole-3-acetic acid	O=C(O)Cc1c[nH]c2ccc(O)cc12	0	0	0	0	0	0	0	0	0	0	0	0	0	0	0	0	0	0	0	0	0	0	0	0	0	0	0	0	0	0	0	0	0	0	0	0	0	0	0	0	0	0	0	0	0	0	0
1404	Indole-3-butyric acid	O=C(O)CCCc1c[nH]c2ccccc12	0	0	0	0	0	0	0	0	0	0	0	0	0	0	0	0	0	0	0	0	0	0	0	0	0	0	0	0	0	0	0	0	0	0	0	0	0	0	0	0	0	0	0	0	0	0	0
1405	alpha-N-Carbomethoxyacetyl-4-chloro-D-tryptophan	COC(=O)CC(=O)NC(Cc1c[nH]c2cccc(Cl)c12)C(=O)O	0	0	0	0	0	0	0	0	0	0	0	0	0	0	0	0	0	0	0	0	0	0	0	0	0	0	0	0	0	0	0	0	0	0	0	0	0	0	0	0	0	0	0	0	0	0	0
1406	alpha-N-Carboethoxyacetyl-4-chloro-D-tryptophan	CCOC(=O)CC(=O)NC(Cc1c[nH]c2cccc(Cl)c12)C(=O)O	0	0	0	0	0	0	0	0	0	0	0	0	0	0	0	0	0	0	0	0	0	0	0	0	0	0	0	0	0	0	0	0	0	0	0	0	0	0	0	0	0	0	0	0	0	0	0
1407	2-Phosphoglycerate	O=C(O)C(CO)OP(=O)(O)O	0	0	0	0	0	0	0	0	0	0	0	0	0	0	0	0	0	0	0	0	0	0	0	0	0	0	0	0	0	0	0	0	0	0	0	0	0	0	0	0	0	0	0	0	0	0	0
1408	4-O-(Indole-3-acetyl)-D-glucopyranose	O=C(Cc1c[nH]c2ccccc12)OC1OC(CO)C(O)C(O)C1O	0	0	0	0	0	0	0	0	0	0	0	0	0	0	0	0	0	0	0	0	0	0	0	0	0	0	0	0	0	0	0	0	0	0	0	0	0	0	0	0	0	0	0	0	0	0	0
1409	5-Hydroxyglucobrassicin	O=S(=O)(O)ON=C(Cc1c[nH]c2ccc(O)cc12)SC1OC(CO)C(O)C(O)C1O	0	0	0	0	0	0	0	0	0	0	0	0	0	0	0	0	0	0	0	0	0	0	0	0	0	0	0	0	0	0	0	0	0	0	0	0	0	0	0	0	0	0	0	0	0	0	0
1410	5-Methoxyglucobrassicin	COc1ccc2[nH]cc(CC(=NOS(=O)(=O)O)SC3OC(CO)C(O)C(O)C3O)c2c1	0	0	0	0	0	0	0	0	0	0	0	0	0	0	0	0	0	0	0	0	0	0	0	0	0	0	0	0	0	0	0	0	0	0	0	0	0	0	0	0	0	0	0	0	0	0	0
1411	(+)-Bottrospicatol	CC1=CC2CC(C1)OC2(C)CO	0	0	0	0	0	0	0	0	0	0	0	0	0	0	0	0	0	0	0	0	0	0	0	0	0	0	0	0	0	0	0	0	0	0	0	0	0	0	0	0	0	0	0	0	0	0	0
1412	Castasterone	CC(C)C(C)C(O)C(O)C(C)C1CCC2C3CC(=O)C4CC(O)C(O)CC4(C)C3CCC12C	0	0	0	0	0	0	0	0	0	0	0	0	0	0	0	0	0	0	0	0	0	0	0	0	0	0	0	0	0	0	0	0	0	0	0	0	0	0	0	0	0	0	0	0	0	0	0
1413	(+/-)-alpha-Thujene	CC1=CCC2(C(C)C)CC12	0	0	0	0	0	0	0	0	0	0	0	0	0	0	0	0	0	0	0	0	0	0	0	0	0	0	0	0	0	0	0	0	0	0	0	0	0	0	0	0	0	0	0	0	0	0	0
1414	3,24-Diepicastasterone	CC(C)C(C)C(O)C(O)C(C)C1CCC2C3CC(=O)C4CC(O)C(O)CC4(C)C3CCC12C	0	0	0	0	0	0	0	0	0	0	0	0	0	0	0	0	0	0	0	0	0	0	0	0	0	0	0	0	0	0	0	0	0	0	0	0	0	0	0	0	0	0	0	0	0	0	0
1415	28-Norcastasterone	CC(C)CC(O)C(O)C(C)C1CCC2C3CC(=O)C4CC(O)C(O)CC4(C)C3CCC12C	0	0	0	0	0	0	0	0	0	0	0	0	0	0	0	0	0	0	0	0	0	0	0	0	0	0	0	0	0	0	0	0	0	0	0	0	0	0	0	0	0	0	0	0	0	0	0
1416	2-Deoxy-28-homocastasterone	CCC(C(C)C)C(O)C(O)C(C)C1CCC2C3CC(=O)C4CC(O)CCC4(C)C3CCC12C	0	0	0	0	0	0	0	0	0	0	0	0	0	0	0	0	0	0	0	0	0	0	0	0	0	0	0	0	0	0	0	0	0	0	0	0	0	0	0	0	0	0	0	0	0	0	0
1417	2-Deoxy-25-Methyldolichosterone	C=C(C(O)C(O)C(C)C1CCC2C3CC(=O)C4CC(O)CCC4(C)C3CCC12C)C(C)(C)C	0	0	0	0	0	0	0	0	0	0	0	0	0	0	0	0	0	0	0	0	0	0	0	0	0	0	0	0	0	0	0	0	0	0	0	0	0	0	0	0	0	0	0	0	0	0	0
1418	3-epi-2-Deoxy-25-methyldolichosterone	C=C(C(O)C(O)C(C)C1CCC2C3CC(=O)C4CC(O)CCC4(C)C3CCC12C)C(C)(C)C	0	0	0	0	0	0	0	0	0	0	0	0	0	0	0	0	0	0	0	0	0	0	0	0	0	0	0	0	0	0	0	0	0	0	0	0	0	0	0	0	0	0	0	0	0	0	0
1419	3-epi-6-Deoxocastasterone	CC(C)C(C)C(O)C(O)C(C)C1CCC2C3CCC4CC(O)C(O)CC4(C)C3CCC12C	0	0	0	0	0	0	0	0	0	0	0	0	0	0	0	0	0	0	0	0	0	0	0	0	0	0	0	0	0	0	0	0	0	0	0	0	0	0	0	0	0	0	0	0	0	0	0
1420	6-Deoxo-28-homo-dolichosterone	CC=C(C(C)C)C(O)C(O)C(C)C1CCC2C3CCC4CC(O)C(O)CC4(C)C3CCC12C	0	0	0	0	0	0	0	0	0	0	0	0	0	0	0	0	0	0	0	0	0	0	0	0	0	0	0	0	0	0	0	0	0	0	0	0	0	0	0	0	0	0	0	0	0	0	0
1421	6-Deoxo-25-methyldolichosterone	C=C(C(O)C(O)C(C)C1CCC2C3CCC4CC(O)C(O)CC4(C)C3CCC12C)C(C)(C)C	0	0	0	0	0	0	0	0	0	0	0	0	0	0	0	0	0	0	0	0	0	0	0	0	0	0	0	0	0	0	0	0	0	0	0	0	0	0	0	0	0	0	0	0	0	0	0
1422	23-O-beta-D-Glucopyranosyl-25-methyldolichosterone	C=C(C(OC1OC(CO)C(O)C(O)C1O)C(O)C(C)C1CCC2C3CC(=O)C4CC(O)C(O)CC4(C)C3CCC12C)C(C)(C)C	0	0	0	0	0	0	0	0	0	0	0	0	0	0	0	0	0	0	0	0	0	0	0	0	0	0	0	0	0	0	0	0	0	0	0	0	0	0	0	0	0	0	0	0	0	0	0
1423	23-O-beta-D-Glucopyranosyl-2-epi-25-methyldolichosterone	C=C(C(OC1OC(CO)C(O)C(O)C1O)C(O)C(C)C1CCC2C3CC(=O)C4CC(O)C(O)CC4(C)C3CCC12C)C(C)(C)C	0	0	0	0	0	0	0	0	0	0	0	0	0	0	0	0	0	0	0	0	0	0	0	0	0	0	0	0	0	0	0	0	0	0	0	0	0	0	0	0	0	0	0	0	0	0	0
1424	Methyl epijasmonate	CCC=CCC1C(=O)CCC1CC(=O)OC	0	0	0	0	0	0	0	0	0	0	0	0	0	0	0	0	0	0	0	0	0	0	0	0	0	0	0	0	0	0	0	0	0	0	0	0	0	0	0	0	0	0	0	0	0	0	0
1425	Parasorbic acid	CC1CC=CC(=O)O1	0	0	0	0	0	0	0	0	0	0	0	0	0	0	0	0	0	0	0	0	0	0	0	0	0	0	0	0	0	0	0	0	0	0	0	0	0	0	0	0	0	0	0	0	0	0	0
1426	2-Thioxothiazolidine-4-carboxylic acid	O=C(O)C1CSC(=S)C1	0	0	0	0	0	0	0	0	0	0	0	0	0	0	0	0	0	0	0	0	0	0	0	0	0	0	0	0	0	0	0	0	0	0	0	0	0	0	0	0	0	0	0	0	0	0	0
1427	Methyl pheophorbide a	C=CC1=C(C)C2=CC3=NC(=C4C5=NC(=CC6=NC(=CC1=N2)C(C)=C6CC)C(C)=C5C(=O)C4C(=O)OC)C(CCC(=O)OC)C3C	0	0	0	0	0	0	0	0	0	0	0	0	0	0	0	0	0	0	0	0	0	0	0	0	0	0	0	0	0	0	0	0	0	0	0	0	0	0	0	0	0	0	0	0	0	0	0
1428	OPC-4:0	CCC=CCC1C(=O)CCC1CCCC(=O)O	0	0	0	0	0	0	0	0	0	0	0	0	0	0	0	0	0	0	0	0	0	0	0	0	0	0	0	0	0	0	0	0	0	0	0	0	0	0	0	0	0	0	0	0	0	0	0
1429	OPC-6:0	CCC=CCC1C(=O)CCC1CCCCCC(=O)O	0	0	0	0	0	0	0	0	0	0	0	0	0	0	0	0	0	0	0	0	0	0	0	0	0	0	0	0	0	0	0	0	0	0	0	0	0	0	0	0	0	0	0	0	0	0	0
1430	(12S,13S)-EOD	CCC=CCC1OC1=CC=CCCCCCCCC(=O)O	0	0	0	0	0	0	0	0	0	0	0	0	0	0	0	0	0	0	0	0	0	0	0	0	0	0	0	0	0	0	0	1	0	0	0	0	1	0	0	0	0	0	0	0	0	0	0
1431	13(S)-Hydroperoxylinolenic acid	CCC=CCC(C=CC=CCCCCCCCC(=O)O)OO	0	0	0	0	0	0	1	0	0	0	0	0	0	0	0	0	0	0	0	0	0	0	0	0	0	0	0	0	0	0	0	1	0	0	0	0	0	0	0	0	0	0	0	0	0	0	0
1432	12-oxo-PDA	CCC=CCC1C(=O)C=CC1CCCCCCCC(=O)O	0	0	0	0	0	0	0	0	0	0	0	0	0	0	0	0	0	0	0	0	0	0	0	0	0	0	0	0	0	0	0	1	0	0	0	0	0	0	0	0	0	0	0	0	0	0	0
1433	3-Oxo-2-(2-entenyl)cyclopentaneoctanoic acid	CCC=CCC1C(=O)CCC1CCCCCCCC(=O)O	0	0	0	0	0	0	0	0	0	0	0	0	0	0	0	0	0	0	0	0	0	0	0	0	0	0	0	0	0	0	0	1	0	0	0	0	0	0	0	0	0	0	0	0	0	0	0
1434	5-HETE	CCCCCC=CCC=CCC=CC=CC(O)CCCC(=O)O	0	0	0	0	0	0	0	0	0	0	0	0	0	0	0	0	0	0	0	0	0	0	0	0	0	0	0	0	0	0	0	0	0	0	0	0	0	0	0	0	0	0	0	0	0	0	0
1435	12-HETE	CCCCCC=CCC(O)C=CC=CCC=CCCCC(=O)O	0	0	0	0	0	0	0	0	0	0	0	0	0	0	0	0	0	0	0	0	0	0	0	0	0	0	0	0	0	0	0	0	0	0	0	0	0	0	0	0	0	0	0	0	0	0	0
1436	15-HETE	CCCCCC(O)C=CC=CCC=CCC=CCCCC(=O)O	0	0	0	0	0	0	0	0	0	0	0	0	0	0	0	0	0	0	0	0	0	0	0	0	0	0	0	0	0	0	0	0	0	0	0	0	0	0	0	0	0	0	0	0	0	0	0
1438	4-Hydroxy-2E-nonenal	CCCCCC(O)C=CC=O	0	0	0	0	0	0	0	0	0	0	0	0	0	0	0	0	0	0	0	0	0	0	0	0	0	0	0	0	0	0	0	0	0	0	0	0	0	0	0	0	0	0	0	0	0	0	0
1439	Ayapin	O=c1ccc2cc3c(cc2o1)OCO3	0	0	0	0	0	0	0	0	0	0	0	0	0	0	0	0	0	0	0	0	0	0	0	0	0	0	0	0	0	0	0	0	0	0	0	0	0	0	0	0	0	0	0	0	0	0	0
1440	(-)-Pinoresinol	COc1cc(C2OCC3C(c4ccc(OC5OC(CO)C(O)C(O)C5O)c(OC)c4)OCC23)ccc1O	0	0	0	0	0	0	0	0	0	0	0	0	0	0	0	0	0	0	0	0	0	0	0	0	0	0	0	0	0	0	0	0	0	0	0	0	0	0	0	0	0	0	0	0	0	0	0
1441	(+)-Secoisolariciresinol	COc1cc(CC(CO)C(CO)Cc2ccc(O)c(OC)c2)ccc1O	0	0	0	0	0	0	0	0	0	0	0	0	0	0	0	0	0	0	0	0	0	0	0	0	0	0	0	0	0	0	0	0	0	0	0	0	0	0	0	0	0	0	0	0	0	0	0
1442	(-)-Arctigenin	COc1cc(CC2C(=O)OCC2Cc2ccc(OC)c(OC)c2)ccc1O	0	0	0	0	0	0	0	0	0	0	0	0	0	0	0	0	0	0	0	0	0	0	0	0	0	0	0	0	0	0	0	0	0	0	0	0	0	0	0	0	0	0	0	0	0	0	0
1443	(+)-Pinoresinolin	COc1cc(OC2OCC3C(c4ccc(O)c(OC)c4)OCC23)ccc1O	0	0	0	0	0	0	0	0	0	0	0	0	0	0	0	0	0	0	0	0	0	0	0	0	0	0	0	0	0	0	0	0	0	0	0	0	0	0	0	0	0	0	0	0	0	0	0
1444	(-)-Arctiin	COc1ccc(CC2COC(=O)C2Cc2ccc(OC3OC(CO)C(O)C(O)C3O)c(OC)c2)cc1OC	0	0	0	0	0	0	0	0	0	0	0	0	0	0	0	0	0	0	0	0	0	0	0	0	0	0	0	0	0	0	0	0	0	0	0	0	0	0	0	0	0	0	0	0	0	0	0
1445	2-Hydroxypseudobaptigenin	O=c1c(-c2cc3c(cc2O)OCO3)coc2cc(O)ccc12	0	0	0	0	0	0	0	0	0	0	0	0	0	0	0	0	0	0	0	0	0	0	0	0	0	0	0	0	0	0	0	0	0	0	0	0	0	0	0	0	0	0	0	0	0	0	0
1446	(3R)-Sophorol	O=C1c2ccc(O)cc2OCC1c1cc2c(cc1O)OCO2	0	0	0	0	0	0	0	0	0	0	0	0	0	0	0	0	0	0	0	0	0	0	0	0	0	0	0	0	0	0	0	0	0	0	0	0	0	0	0	0	0	0	0	0	0	0	0
1447	Medioresinol	COc1cc(C2OCC3C(c4cc(OC)c(O)c(OC)c4)OCC23)ccc1O	0	0	0	0	0	0	0	0	0	0	0	0	0	0	0	0	0	0	0	0	0	0	0	0	0	0	0	0	0	0	0	0	0	0	0	0	0	0	0	0	0	0	0	0	0	0	0
1448	(-)-Olivil	COc1cc(CC2(O)COC(c3ccc(O)c(OC)c3)C2CO)ccc1O	0	0	0	0	0	0	0	0	0	0	0	0	0	0	0	0	0	0	0	0	0	0	0	0	0	0	0	0	0	0	0	0	0	0	0	0	0	0	0	0	0	0	0	0	0	0	0
1449	Lappaol A	COc1cc(CC2C(=O)OCC2Cc2cc(OC)c3c(c2)C(CO)C(c2ccc(O)c(OC)c2)O3)ccc1O	0	0	0	0	0	0	0	0	0	0	0	0	0	0	0	0	0	0	0	0	0	0	0	0	0	0	0	0	0	0	0	0	0	0	0	0	0	0	0	0	0	0	0	0	0	0	0
1450	Lappaol C	COc1cc(CC2C(=O)OCC2Cc2cc(OC)c(O)c(C(CO)C(O)c3ccc(O)c(OC)c3)c2)ccc1O	0	0	0	0	0	0	0	0	0	0	0	0	0	0	0	0	0	0	0	0	0	0	0	0	0	0	0	0	0	0	0	0	0	0	0	0	0	0	0	0	0	0	0	0	0	0	0
1451	Phosphoenolpyruvic acid	C=C(OP(=O)(O)O)C(=O)O	0	0	0	0	0	0	0	0	0	0	0	0	0	0	0	0	0	0	0	0	0	0	0	0	0	0	0	0	0	0	0	0	0	0	0	0	0	0	0	0	0	0	0	0	0	0	0
1452	(+)-Bornyl diphosphate	CC1(C)C2CCC1(C)C(OP(=O)(O)OP(=O)(O)O)C2	0	0	0	0	0	0	0	0	0	0	0	0	0	0	0	0	0	0	0	0	0	0	0	0	0	0	0	0	0	0	0	0	0	0	0	0	0	0	0	0	0	0	0	0	0	1	0
1453	(+)-Camphene	C=C1C2CCC(C2)C1(C)C	0	0	0	0	0	0	0	0	0	0	0	0	0	0	0	0	0	0	0	0	0	0	0	0	0	0	0	0	0	0	0	0	0	0	0	0	0	0	0	0	0	0	0	0	0	0	0
1454	(+)-trans-Sabinene hydrate	CC(C)C12CCC(C)(O)C1C2	0	0	0	0	0	0	0	0	0	0	0	0	0	0	0	0	0	0	0	0	0	0	0	0	0	0	0	0	0	0	0	0	0	0	0	0	0	0	0	0	0	0	0	0	0	0	0
1455	(+)-Sabinone	C=C1C(=O)CC2(C(C)C)CC12	0	0	0	0	0	0	0	0	0	0	0	0	0	0	0	0	0	0	0	0	0	0	0	0	0	0	0	0	0	0	0	0	0	0	0	0	0	0	0	0	0	0	0	0	0	0	0
1456	cis-Sabinene hydrate	CC(C)C12CCC(C)(O)C1C2	0	0	0	0	0	0	0	0	0	0	0	0	0	0	0	0	0	0	0	0	0	0	0	0	0	0	0	0	0	0	0	0	0	0	0	0	0	0	0	0	0	0	0	0	0	0	0
1457	(+)-trans-Sabinol	CC1C(O)CC2(C(C)C)CC12	0	0	0	0	0	0	0	0	0	0	0	0	0	0	0	0	0	0	0	0	0	0	0	0	0	0	0	0	0	0	0	0	0	0	0	0	0	0	0	0	0	0	0	0	0	0	0
1458	(3R)-Linalyl diphosphate	C=CC(C)(CCC=C(C)C)OP(=O)(O)OP(=O)(O)O	0	0	0	0	0	0	0	0	0	0	0	0	0	0	0	0	0	0	0	0	0	0	0	0	0	0	0	0	0	0	0	0	0	0	0	0	0	0	0	0	0	0	0	0	0	1	0
1459	2-Hydroxycampholonic acid	CC1(O)C(=O)CC(CC(=O)O)C1(C)C	0	0	0	0	0	0	0	0	0	0	0	0	0	0	0	0	0	0	0	0	0	0	0	0	0	0	0	0	0	0	0	0	0	0	0	0	0	0	0	0	0	0	0	0	0	0	0
1460	alpha-Campholonic acid	CC1C(=O)CC(CC(=O)O)C1(C)C	0	0	0	0	0	0	0	0	0	0	0	0	0	0	0	0	0	0	0	0	0	0	0	0	0	0	0	0	0	0	0	0	0	0	0	0	0	0	0	0	0	0	0	0	0	0	0
1461	6-Oxocamphor	CCC1(O)C(=O)OCc2c1cc1n(c2=O)Cc2cc3c(CN(C)C)c(O)ccc3nc2-1.Cl	0	0	0	0	0	0	0	0	0	0	0	0	0	0	0	0	0	0	0	0	0	0	0	0	0	0	0	0	0	0	0	0	0	0	0	0	0	0	0	0	0	0	0	0	0	0	0
1462	cis-beta-Ocimene	C=CC(C)=CCC=C(C)C	0	0	0	0	0	0	0	0	0	0	0	0	0	0	0	0	0	0	0	0	0	0	0	0	0	0	0	0	0	0	0	0	0	0	0	0	0	0	0	0	0	0	0	0	0	0	0
1463	Geranyl diphosphate	CC(C)=CCCC(C)=CCOP(=O)(O)OP(=O)(O)O	0	0	0	0	0	0	0	0	0	0	0	0	0	0	0	0	0	0	0	0	0	0	0	0	0	0	0	0	0	0	0	0	0	0	0	0	0	0	0	0	0	0	0	0	0	1	0
1464	Isoketocamphoric acid	CC(=O)C(C)(C)C(CC(=O)O)CC(=O)O	0	0	0	0	0	0	0	0	0	0	0	0	0	0	0	0	0	0	0	0	0	0	0	0	0	0	0	0	0	0	0	0	0	0	0	0	0	0	0	0	0	0	0	0	0	0	0
1465	trans-beta-Ocimene	C=CC(C)=CCC=C(C)C	0	0	0	0	0	0	0	0	0	0	0	0	0	0	0	0	0	0	0	0	0	0	0	0	0	0	0	0	0	0	0	0	0	0	0	0	0	0	0	0	0	0	0	0	0	0	0
1466	9beta-Pimara-7,15-diene	C=CC1(C)CCC2C(=CCC3C(C)(C)CCCC23C)C1	0	0	0	0	0	0	0	0	0	0	0	0	0	0	0	0	0	0	0	0	0	0	0	0	0	0	0	0	0	0	0	0	0	0	0	0	0	0	0	0	0	0	0	0	0	0	0
1467	ent-Copalyl diphosphate	C=C1CCC2C(C)(C)CCCC2(C)C1CCC(C)=CCOP(=O)(O)OP(=O)(O)O	0	0	0	0	0	0	0	0	0	0	0	0	0	0	0	0	0	0	0	0	0	0	0	0	0	0	0	0	0	0	0	0	0	0	0	0	0	0	0	0	0	0	0	0	0	1	0
1468	ent-Sandaracopimaradiene	C=CC1(C)C=C2CCC3C(C)(C)CCCC3(C)C2CC1	0	0	0	0	0	0	0	0	0	0	0	0	0	0	0	0	0	0	0	0	0	0	0	0	0	0	0	0	0	0	0	0	0	0	0	0	0	0	0	0	0	0	0	0	0	0	0
1469	Stemar-13-ene	CC1=CC2CCC3C(C)(C)CCCC3(C)C23CCC1C3	0	0	0	0	0	0	0	0	0	0	0	0	0	0	0	0	0	0	0	0	0	0	0	0	0	0	0	0	0	0	0	0	0	0	0	0	0	0	0	0	0	0	0	0	0	0	0
1470	syn-Copalyl diphosphate	C=C1CCC2C(C)(C)CCCC2(C)C1CCC(C)=CCOP(=O)(O)OP(=O)(O)O	0	0	0	0	0	0	0	0	0	0	0	0	0	0	0	0	0	0	0	0	0	0	0	0	0	0	0	0	0	0	0	0	0	0	0	0	0	0	0	0	0	0	0	0	0	1	0
1471	Butin	O=C1CC(c2ccc(O)c(O)c2)Oc2cc(O)ccc21	0	0	0	0	0	0	0	0	0	0	0	0	0	0	0	0	0	0	0	0	0	0	0	0	0	0	0	0	0	0	0	0	0	0	0	0	0	0	0	0	0	0	0	0	0	0	0
1472	Sakuranetin	COc1cc(O)c2c(c1)OC(c1ccc(O)cc1)CC2=O	0	0	0	0	0	0	0	0	0	0	0	0	0	0	0	0	0	0	0	0	0	0	0	0	0	0	0	0	0	0	0	0	0	0	0	0	0	0	0	0	0	0	0	0	0	0	0
1473	6-Methylscutellarein	COc1c(O)cc2oc(-c3ccc(O)cc3)cc(=O)c2c1O	0	0	0	0	0	0	0	0	0	0	0	0	0	0	0	0	0	0	0	0	0	0	0	0	0	0	0	0	0	0	0	0	0	0	0	0	0	0	0	0	0	0	0	0	0	0	0
1474	beta-D-Glucosamine	NC1C(O)OC(CO)C(O)C1O	0	0	0	0	0	0	0	0	0	0	0	0	0	0	0	0	0	0	0	0	0	0	0	0	0	0	0	0	0	0	0	0	0	0	0	0	0	0	0	0	0	0	0	0	0	0	0
1475	D-Arabitol	OCC(O)C(O)C(O)CO	0	0	0	0	0	0	0	0	0	0	0	0	0	0	0	0	0	0	0	0	0	0	0	0	0	0	0	0	0	0	0	0	0	0	0	0	0	0	0	0	0	0	0	0	0	0	0
1476	2-Carboxyarabinitol 1-phosphate	O=C(O)C(O)(COP(=O)(O)O)C(O)C(O)CO	0	0	0	0	0	0	0	0	0	0	0	0	0	0	0	0	0	0	0	0	0	0	0	0	0	0	0	0	0	0	0	0	0	0	0	0	0	0	0	0	0	0	0	0	0	0	0
1477	Glutaric acid	O=C(O)CCCC(=O)O	0	0	0	0	0	0	0	0	0	0	0	0	0	0	0	0	0	0	0	0	0	0	0	0	0	0	0	0	0	0	0	0	0	0	0	0	0	0	0	0	0	0	0	0	0	0	0
1478	Glyoxylic acid	O=CC(=O)O	0	0	0	0	0	0	0	0	0	0	0	0	0	0	0	0	0	0	0	0	0	0	0	0	0	0	0	0	0	0	0	0	0	0	0	0	0	0	0	0	0	0	0	0	0	0	0
1479	Oxalacetic acid	O=C(O)CC(=O)C(=O)O	0	0	0	0	0	0	0	0	0	0	0	0	0	0	0	0	0	0	0	0	0	0	0	0	0	0	0	0	0	0	0	0	0	0	0	0	0	0	0	0	0	0	0	0	0	0	0
1480	Hentriacontane	CCCCCCCCCCCCCCCCCCCCCCCCCCCCCCC	0	0	0	0	0	0	0	0	0	0	0	0	0	0	0	0	0	0	0	0	0	0	0	0	0	0	0	0	0	0	0	1	0	0	0	0	0	0	0	0	0	0	0	0	0	0	0
1481	Hentriacontane-14,16-dione	CCCCCCCCCCCCCCCC(=O)CC(=O)CCCCCCCCCCCCC	0	0	0	0	0	0	0	0	0	0	0	0	0	0	0	0	0	0	0	0	0	0	0	0	0	0	0	0	0	0	0	1	0	0	0	0	0	0	0	0	0	0	0	0	0	0	0
1482	Hexacosan-1-ol	CCCCCCCCCCCCCCCCCCCCCCCCCCO	0	0	0	0	0	0	0	0	0	0	0	0	0	0	0	0	0	0	0	0	0	0	0	0	0	0	0	0	0	0	0	1	0	0	0	0	0	0	0	0	0	0	0	0	0	0	0
1483	Triacontan-1-ol	CCCCCCCCCCCCCCCCCCCCCCCCCCCCCCO	0	0	0	0	0	0	0	0	0	0	0	0	0	0	0	0	0	0	0	0	0	0	0	0	0	0	0	0	0	0	0	1	0	0	0	0	0	0	0	0	0	0	0	0	0	0	0
1484	Tritriacontane	CCCCCCCCCCCCCCCCCCCCCCCCCCCCCCCCC	0	0	0	0	0	0	0	0	0	0	0	0	0	0	0	0	0	0	0	0	0	0	0	0	0	0	0	0	0	0	0	1	0	0	0	0	0	0	0	0	0	0	0	0	0	0	0
1485	Dehydrosafynol	CC=CC#CC#CC#CC#CC(O)CO	0	0	0	0	0	0	0	0	0	0	0	0	0	0	0	0	0	0	0	0	0	0	0	0	0	0	0	0	0	0	0	0	0	0	0	0	0	0	0	0	0	0	0	0	0	0	0
1486	Eutypine	C=C(C)C#Cc1cc(C=O)ccc1O	0	0	0	0	0	0	0	0	0	0	0	0	0	0	0	0	0	0	0	0	0	0	0	0	0	0	0	0	0	0	0	0	0	0	0	0	0	0	0	0	0	0	0	0	0	0	0
1487	(Z)-3,5-Hexadienyl butyrate	C=CC=CCCOC(=O)CCC	0	0	0	0	0	0	0	0	0	0	0	0	0	0	0	0	0	0	0	0	0	0	0	0	0	0	0	0	0	0	0	0	0	0	0	0	0	0	0	0	0	0	0	0	0	0	0
1488	Pinolidoxin	CC=CC=CC(=O)OC1CCC=CC(O)C(O)C(CCC)OC1=O	0	0	0	0	0	0	0	0	0	0	0	0	0	0	0	0	0	0	0	0	0	0	0	0	0	0	0	0	0	0	0	0	0	0	0	0	0	0	0	0	0	0	0	0	0	0	0
1489	12-Hydroxyjasmonic acid glucoside	O=C(O)CC1CCC(=O)C1CC=CCCOC1OC(CO)C(O)C(O)C1O	0	0	0	0	0	0	0	0	0	0	0	0	0	0	0	0	0	0	0	0	0	0	0	0	0	0	0	0	0	0	0	0	0	0	0	0	0	0	0	0	0	0	0	0	0	0	0
1490	L-Homoarginine	NC(N)=NCCCCC(N)C(=O)O	0	0	0	0	0	0	0	0	0	0	0	0	0	0	0	0	0	0	0	0	0	0	0	0	0	0	0	0	0	0	0	0	0	0	0	0	0	0	0	0	0	0	0	0	0	0	0
1491	L-Homocysteine	NC(CCS)C(=O)O	0	0	0	0	0	0	0	0	0	0	0	0	0	0	0	0	0	0	0	0	0	0	0	0	0	0	0	0	0	0	0	0	0	0	0	1	0	0	0	0	0	0	0	0	0	0	0
1492	(+)-gamma-Hydroxy-L-homoarginine	NC(N)=NCCC(O)CC(N)C(=O)O	0	0	0	0	0	0	0	0	0	0	0	0	0	0	0	0	0	0	0	0	0	0	0	0	0	0	0	0	0	0	0	0	0	0	0	0	0	0	0	0	0	0	0	0	0	0	0
1493	Cadaverine	[NH3+]CCCCC[NH3+]	0	0	0	0	0	0	0	0	0	0	0	0	0	0	0	0	0	0	0	0	0	0	0	0	0	0	0	0	0	0	0	0	0	0	0	0	0	0	0	0	0	0	0	0	0	0	0
1494	Putrescine	NCCCCN	0	0	0	0	0	0	0	0	0	0	0	0	0	0	0	0	0	0	0	0	0	0	0	0	0	0	0	0	0	0	0	0	0	0	0	0	0	0	0	0	0	0	0	0	0	0	0
1495	Glucolepidiin	CCC(=NOS(=O)(=O)O)SC1OC(CO)C(O)C(O)C1O	0	0	0	0	0	0	0	0	0	0	0	0	0	0	0	0	0	0	0	0	0	0	0	0	0	0	0	0	0	0	0	0	0	0	0	0	0	0	0	0	0	0	0	0	0	0	0
1496	Glucoputranjivin	CC(C)C(=NOS(=O)(=O)[O-])SC1OC(CO)C(O)C(O)C1O	0	0	0	0	0	0	0	0	0	0	0	0	0	0	0	0	0	0	0	0	0	0	0	0	0	0	0	0	0	0	0	0	0	0	0	0	0	0	0	0	0	0	0	0	0	0	0
1497	3' 5'-cyclic AMP	Nc1ncnc2c1ncn2C1OC2COP(=O)(O)OC2C1O	0	0	0	0	0	0	0	0	0	0	0	0	0	0	0	0	0	0	0	0	0	0	0	0	0	0	0	0	0	0	0	0	0	0	0	0	0	0	0	0	0	0	0	0	0	0	0
1498	Glutathione	NC(CCC(=O)NC(CS)C(=O)NCC(=O)O)C(=O)O	0	0	0	0	0	0	0	0	0	0	0	0	0	0	0	0	0	0	0	0	0	0	0	0	0	0	0	0	0	0	0	0	0	0	0	1	0	0	0	0	0	0	0	0	0	0	0
1499	Phaseolotoxin	CC(NC(=O)C(N)CCCNP(=N)(N)NS(=O)(=O)O)C(=O)NC(CCCN=C(N)N)C(=O)O	0	0	0	0	0	0	0	0	0	0	0	0	0	0	0	0	0	0	0	0	0	0	0	0	0	0	0	0	0	0	0	0	0	0	0	0	0	0	0	0	0	0	0	0	0	0	0
1500	Cucumopine	O=C(O)CCC1(C(=O)O)NC(C(=O)O)Cc2nc[nH]c21	0	0	0	0	0	0	0	0	0	0	0	0	0	0	0	0	0	0	0	0	0	0	0	0	0	0	0	0	0	0	0	0	0	0	0	0	0	0	0	0	0	0	0	0	0	0	0
1501	Dimboa glucoside	COc1ccc2c(c1)OC(OC1OC(CO)C(O)C(O)C1O)C(=O)N2O	0	0	0	0	0	0	0	0	0	0	0	0	0	0	0	0	0	0	0	0	0	0	0	0	0	0	0	0	0	0	0	0	0	0	0	0	0	0	0	0	0	0	0	0	0	0	0
1502	Glaucine	COc1cc2c(cc1OC)-c1c(OC)c(OC)cc3c1C(C2)N(C)CC3	0	0	0	0	0	0	0	0	0	0	0	0	0	0	0	0	0	0	0	0	0	0	0	0	0	0	0	0	0	0	0	0	0	0	0	0	0	0	0	0	0	0	0	0	0	0	0
1503	Liriodenine	O=C1c2ccccc2-c2c3c(cc4ccnc1c24)OCO3	0	0	0	0	0	0	0	0	0	0	0	0	0	0	0	0	0	0	0	0	0	0	0	0	0	0	0	0	0	0	0	0	0	0	0	0	0	0	0	0	0	0	0	0	0	0	0
1504	Xylopine	COc1ccc2c(c1)CC1NCCc3cc4c(c-2c31)OCO4	0	0	0	0	0	0	0	0	0	0	0	0	0	0	0	0	0	0	0	0	0	0	0	0	0	0	0	0	0	0	0	0	0	0	0	0	0	0	0	0	0	0	0	0	0	0	0
1505	Lycopsamine	CC(C)C(O)(C(=O)OCC1=CCN2CCC(O)C12)C(C)O	0	0	0	0	0	0	0	0	0	0	0	0	0	0	0	0	0	0	0	0	0	0	0	0	0	0	0	0	0	0	0	0	0	0	0	0	0	0	0	0	0	0	0	0	0	0	0
1507	2,8-Dihydroxy-3,4,7-trimethoxy-dibenzofuran	COc1cc2oc3c(OC)c(OC)c(O)cc3c2cc1O	0	0	0	0	0	0	0	0	0	0	0	0	0	0	0	0	0	0	0	0	0	0	0	0	0	0	0	0	0	0	0	0	0	0	0	0	0	0	0	0	0	0	0	0	0	0	0
1508	Alloimperatorin	CC(C)=CCc1c2ccoc2c(O)c2oc(=O)ccc12	0	0	0	0	0	0	0	0	0	0	0	0	0	0	0	0	0	0	0	0	0	0	0	0	0	0	0	0	0	0	0	0	0	0	0	0	0	0	0	0	0	0	0	0	0	0	0
1509	Peucedanin	COc1c(C(C)C)oc2cc3oc(=O)ccc3cc12	0	0	0	0	0	0	0	0	0	0	0	0	0	0	0	0	0	0	0	0	0	0	0	0	0	0	0	0	0	0	0	0	0	0	0	0	0	0	0	0	0	0	0	0	0	0	0
1510	4,8,5'-Trimethylpsoralen	Cc1cc2cc3c(C)cc(=O)oc3c(C)c2o1	0	0	0	0	0	0	0	0	0	0	0	0	0	0	0	0	0	0	0	0	0	0	0	0	0	0	0	0	0	0	0	0	0	0	0	0	0	0	0	0	0	0	0	0	0	0	0
1511	Anhydroglycinol	Oc1ccc2c(c1)OCc1c-2oc2cc(O)ccc12	0	0	0	0	0	0	0	0	0	0	0	0	0	0	0	0	0	0	0	0	0	0	0	0	0	0	0	0	0	0	0	0	0	0	0	0	0	0	0	0	0	0	0	0	0	0	0
1512	1,2-Benzenediol	Oc1ccccc1O	0	0	0	0	0	0	0	0	0	0	0	0	0	0	0	0	0	0	0	0	0	0	0	0	0	0	0	0	0	0	0	0	0	0	0	0	0	0	0	0	0	0	0	0	0	0	0
1513	Coniferyl aldehyde	COc1cc(C=CC=O)ccc1O	0	0	0	0	0	0	0	0	0	0	0	0	0	0	0	0	0	0	0	0	0	0	0	0	0	0	0	0	0	0	0	0	0	0	0	0	0	0	0	0	0	0	0	0	0	0	0
1514	1,5-Dicaffeoylquinic acid	O=C(C=Cc1ccc(O)c(O)c1)OC1CC(OC(=O)C=Cc2ccc(O)c(O)c2)(C(=O)O)CC(O)C1O	0	0	0	0	0	0	0	0	0	0	0	0	0	0	0	0	0	0	0	0	0	0	0	0	0	0	0	0	0	0	0	0	0	0	0	0	0	0	0	0	0	0	0	0	0	0	0
1515	Sinapaldehyde	COc1cc(C=CC=O)cc(OC)c1O	0	0	0	0	0	0	0	0	0	0	0	0	0	0	0	0	0	0	0	0	0	0	0	0	0	0	0	0	0	0	0	0	0	0	0	0	0	0	0	0	0	0	0	0	0	0	0
1518	Aucuparin	COc1cc(-c2ccccc2)cc(OC)c1O	0	0	0	0	0	0	0	0	0	0	0	0	0	0	0	0	0	0	0	0	0	0	0	0	0	0	0	0	0	0	0	0	0	0	0	0	0	0	0	0	0	0	0	0	0	0	0
1519	Lapachenole	COc1cc2c(c3ccccc13)OC(C)(C)C=C2	0	0	0	0	0	0	0	0	0	0	0	0	0	0	0	0	0	0	0	0	0	0	0	0	0	0	0	0	0	0	0	0	0	0	0	0	0	0	0	0	0	0	0	0	0	0	0
1520	(+)-Rotundifolone	CC(C)=C1CCC2(C)OC2C1=O	0	0	0	0	0	0	0	0	0	0	0	0	0	0	0	0	0	0	0	0	0	0	0	0	0	0	0	0	0	0	0	0	0	0	0	0	1	0	0	0	0	0	0	0	0	0	0
1521	Verbenalin	COC(=O)C1=COC(OC2OC(CO)C(O)C(O)C2O)C2C(C)CC(=O)C12	0	0	0	0	0	0	0	0	0	0	0	0	0	0	0	0	0	0	0	0	0	0	0	0	0	0	0	0	0	0	0	0	0	0	0	0	0	0	0	0	0	0	0	0	0	0	0
1522	alpha-Copaene	CC1=CCC2C3C(C(C)C)CCC2(C)C13	0	0	0	0	0	0	0	0	0	0	0	0	0	0	0	0	0	0	0	0	0	0	0	0	0	0	0	0	0	0	0	0	0	0	0	0	0	0	0	0	0	0	0	0	0	0	0
1523	(S)-(+)-Curcumene	C=CCCC(C)c1ccc(C)cc1	0	0	0	0	0	0	0	0	0	0	0	0	0	0	0	0	0	0	0	0	0	0	0	0	0	0	0	0	0	0	0	0	0	0	0	0	0	0	0	0	0	0	0	0	0	0	0
1524	Ipomoeamarone	CC(C)CC(=O)CC1(C)CCC(c2ccoc2)O1	0	0	0	0	0	0	0	0	0	0	0	0	0	0	0	0	0	0	0	0	0	0	0	0	0	0	0	0	0	0	0	0	0	0	0	0	0	0	0	0	0	0	0	0	0	0	0
1525	alpha-Ylangene	CC1=CCC2C3C(C(C)C)CCC2(C)C13	0	0	0	0	0	0	0	0	0	0	0	0	0	0	0	0	0	0	0	0	0	0	0	0	0	0	0	0	0	0	0	0	0	0	0	0	0	0	0	0	0	0	0	0	0	0	0
1526	Arctiopicrin	C=C1C(=O)OC2C=C(CO)CCC=C(C)CC(OC(=O)C(C)CO)C12	0	0	0	0	0	0	0	0	0	0	0	0	0	0	0	0	0	0	0	0	0	0	0	0	0	0	0	0	0	0	0	0	0	0	0	0	0	0	0	0	0	0	0	0	0	0	0
1527	8-Deoxylactucin	C=C1C(=O)OC2C1CCC(C)=C1C(=O)C=C(CO)C12	0	0	0	0	0	0	0	0	0	0	0	0	0	0	0	0	0	0	0	0	0	0	0	0	0	0	0	0	0	0	0	0	0	0	0	0	0	0	0	0	0	0	0	0	0	0	0
1528	Geranylgeraniol	CC(C)=CCCC(C)=CCCC(C)=CCCC(C)=CCO	0	0	0	0	0	0	0	0	0	0	0	0	0	0	0	0	0	0	0	0	0	0	0	0	0	0	0	0	0	0	0	0	0	0	0	0	0	0	0	0	0	0	0	0	0	0	0
1529	Oryzalexin A	C=CC1(C)C=C2C(=O)CC3C(C)(C)C(O)CCC3(C)C2CC1	0	0	0	0	0	0	0	0	0	0	0	0	0	0	0	0	0	0	0	0	0	0	0	0	0	0	0	0	0	0	0	0	0	0	0	0	0	0	0	0	0	0	0	0	0	0	0
1530	Theasaponin	CC=C(C)C(=O)OC1C(OC(C)=O)C2(CO)C(O)CC3(C)C(=CCC4C5(C)CCC(OC6OC(C(=O)O)C(O)C(OC7OC(CO)C(O)C(O)C7O)C6OC6OCC(O)C(O)C6OC6OCC(O)C(O)C6O)C(C)(CO)C5CCC43C)C2CC1(C)C	0	0	0	0	0	0	0	0	0	0	0	0	0	0	0	0	0	0	0	0	0	0	0	0	0	0	0	0	0	0	0	0	0	0	0	0	0	0	0	0	0	0	0	0	0	0	0
1531	Officinalisnin I	CC(CCC1(O)OC2CC3C4CCC5CC(OC6OC(CO)C(O)C(O)C6OC6OC(CO)C(O)C(O)C6O)CCC5(C)C4CCC3(C)C2C1C)COC1OC(CO)C(O)C(O)C1O	0	0	0	0	0	0	0	0	0	0	0	0	0	0	0	0	0	0	0	0	0	0	0	0	0	0	0	0	0	0	0	0	0	0	0	0	0	0	0	0	0	0	0	0	0	0	0
1532	Betulinic acid	C=C(C)C1CCC2(C(=O)O)CCC3(C)C(CCC4C5(C)CCC(O)C(C)(C)C5CCC43C)C12	0	0	0	0	0	0	0	0	0	0	0	0	0	0	0	0	0	0	0	0	0	0	0	0	0	0	0	0	0	0	0	0	0	0	0	0	0	0	0	0	0	0	0	0	0	0	0
1533	beta-Carotene 5,6-epoxide	CC(C=CC=C(C)C=CC1=C(C)CCCC1(C)C)=CC=CC=C(C)C=CC=C(C)C=CC12OC1(C)CCCC2(C)C	0	0	0	0	0	0	0	0	0	0	0	0	0	0	0	0	0	0	0	0	0	0	0	0	0	0	0	0	0	0	0	0	0	0	0	0	1	0	0	0	0	0	0	0	0	0	0
1534	Lactucaxanthin	CC(C=CC=C(C)C=CC1C(C)=CC(O)CC1(C)C)=CC=CC=C(C)C=CC=C(C)C=CC1C(C)=CC(O)CC1(C)C	0	0	0	0	0	0	0	0	0	0	0	0	0	0	0	0	0	0	0	0	0	0	0	0	0	0	0	0	0	0	0	0	0	0	0	0	0	0	0	0	0	0	0	0	0	0	0
1536	7,4'-Dihydroxyflavone	O=c1cc(-c2ccc(O)cc2)oc2cc(O)ccc12	0	0	0	0	0	0	0	0	0	0	0	0	0	0	0	0	0	0	0	0	0	0	0	0	0	0	0	0	0	0	0	0	0	0	0	0	0	0	0	0	0	0	0	0	0	0	0
1537	Cirsimaritin	COc1cc2oc(-c3ccc(O)cc3)cc(=O)c2c(O)c1OC	0	0	0	0	0	0	0	0	0	0	0	0	0	0	0	0	0	0	0	0	0	0	0	0	0	0	0	0	0	0	0	0	0	0	0	0	0	0	0	0	0	0	0	0	0	0	0
1538	Tetramethoxyluteolin	COc1cc(OC)c2c(=O)cc(-c3ccc(OC)c(OC)c3)oc2c1	0	0	0	0	0	0	0	0	0	0	0	0	0	0	0	0	0	0	0	0	0	0	0	0	0	0	0	0	0	0	0	0	0	0	0	0	0	0	0	0	0	0	0	0	0	0	0
1539	Eupatorin	COc1ccc(-c2cc(=O)c3c(O)c(OC)c(OC)cc3o2)cc1O	0	0	0	0	0	0	0	0	0	0	0	0	0	0	0	0	0	0	0	0	0	0	0	0	0	0	0	0	0	0	0	0	0	0	0	0	0	0	0	0	0	0	0	0	0	0	0
1540	Apigenin 7-(6''-malonylglucoside)	O=C(O)CC(=O)OCC1OC(Oc2cc(O)c3c(=O)c(O)c(-c4ccc(O)cc4)oc3c2)C(O)C(O)C1O	0	0	0	0	0	0	0	0	0	0	0	0	0	0	0	0	0	0	0	0	0	0	0	0	0	0	0	0	0	0	0	0	0	0	0	0	0	0	0	0	0	0	0	0	0	0	0
1541	Luteolin 7-(2''-apiosylglucoside)	O=c1cc(-c2ccc(O)c(O)c2)oc2cc(OC3OC(CO)C(O)C(O)C3OC3OCC(O)(CO)C3O)cc(O)c12	0	0	0	0	0	0	0	0	0	0	0	0	0	0	0	0	0	0	0	0	0	0	0	0	0	0	0	0	0	0	0	0	0	0	0	0	0	0	0	0	0	0	0	0	0	0	0
1545	5,7-Dihydroxy-3,6-dimethoxyflavone	COc1c(O)cc2oc(-c3ccccc3)c(OC)c(=O)c2c1O	0	0	0	0	0	0	0	0	0	0	0	0	0	0	0	0	0	0	0	0	0	0	0	0	0	0	0	0	0	0	0	0	0	0	0	0	0	0	0	0	0	0	0	0	0	0	0
1546	Artemetin	COc1ccc(-c2oc3cc(OC)c(OC)c(O)c3c(=O)c2OC)cc1OC	0	0	0	0	0	0	0	0	0	0	0	0	0	0	0	0	0	0	0	0	0	0	0	0	0	0	0	0	0	0	0	0	0	0	0	0	0	0	0	0	0	0	0	0	0	0	0
1547	3,3',4',7,8-Pentamethylgossypetin	COc1ccc(-c2oc3c(OC)c(OC)cc(O)c3c(=O)c2OC)cc1OC	0	0	0	0	0	0	0	0	0	0	0	0	0	0	0	0	0	0	0	0	0	0	0	0	0	0	0	0	0	0	0	0	0	0	0	0	0	0	0	0	0	0	0	0	0	0	0
1548	5,3',4'-Trihydroxy-3-methoxy-6,7-methylenedioxyflavone	COc1c(-c2ccc(O)c(O)c2)oc2cc3c(c(O)c2c1=O)OCO3	0	0	0	0	0	0	0	0	0	0	0	0	0	0	0	0	0	0	0	0	0	0	0	0	0	0	0	0	0	0	0	0	0	0	0	0	0	0	0	0	0	0	0	0	0	0	0
1549	Isorhamnetin 3-vicianoside	COc1cc(-c2oc3cc(O)cc(O)c3c(=O)c2OC2OC(COC3OCC(O)C(O)C3O)C(O)C(O)C2O)ccc1O	0	0	0	0	0	0	0	0	0	0	0	0	0	0	0	0	0	0	0	0	0	0	0	0	0	0	0	0	0	0	0	0	0	0	0	0	0	0	0	0	0	0	0	0	0	0	0
1550	5,3',4'-Trihydroxy-3-methoxy-6,7-methylenedioxyflavone 4'-glucuronide	COc1c(-c2ccc(OC3OC(C(=O)O)C(O)C(O)C3O)c(O)c2)oc2cc3c(c(O)c2c1=O)OCO3	0	0	0	0	0	0	0	0	0	0	0	0	0	0	0	0	0	0	0	0	0	0	0	0	0	0	0	0	0	0	0	0	0	0	0	0	0	0	0	0	0	0	0	0	0	0	0
1551	5,4'-Dihydroxy-3,3'-dimethoxy-6,7-methylenedioxyflavone 4'-glucuronide	COc1cc(-c2oc3cc4c(c(O)c3c(=O)c2OC)OCO4)ccc1OC1OC(C(=O)O)C(O)C(O)C1O	0	0	0	0	0	0	0	0	0	0	0	0	0	0	0	0	0	0	0	0	0	0	0	0	0	0	0	0	0	0	0	0	0	0	0	0	0	0	0	0	0	0	0	0	0	0	0
1552	Kaempferol 3-(2'''-(E)-caffeylsophoroside)-7-glucoside	O=C(C=Cc1ccc(O)c(O)c1)OC1C(OC2C(Oc3c(-c4ccc(O)cc4)oc4cc(OC5OC(CO)C(O)C(O)C5O)cc(O)c4c3=O)OC(CO)C(O)C2O)OC(CO)C(O)C1O	0	0	0	0	0	0	0	0	0	0	0	0	0	0	0	0	0	0	0	0	0	0	0	0	0	0	0	0	0	0	0	0	0	0	0	0	0	0	0	0	0	0	0	0	0	0	0
1553	Quercetin 3-(6''''-p-coumarylsophorotrioside)	O=C(C=Cc1ccc(O)cc1)OCC1OC(OC2C(OC3C(Oc4c(-c5ccc(O)c(O)c5)oc5cc(O)cc(O)c5c4=O)OC(CO)C(O)C3O)OC(CO)C(O)C2O)C(O)C(O)C1O	0	0	0	0	0	0	0	0	0	0	0	0	0	0	0	0	0	0	0	0	0	0	0	0	0	0	0	0	0	0	0	0	0	0	0	0	0	0	0	0	0	0	0	0	0	0	0
1554	Quercetin 3-(6''''-caffeylsophorotrioside)	O=C(C=Cc1ccc(O)c(O)c1)OCC1OC(OC2C(OC3C(Oc4c(-c5ccc(O)c(O)c5)oc5cc(O)cc(O)c5c4=O)OC(CO)C(O)C3O)OC(CO)C(O)C2O)C(O)C(O)C1O	0	0	0	0	0	0	0	0	0	0	0	0	0	0	0	0	0	0	0	0	0	0	0	0	0	0	0	0	0	0	0	0	0	0	0	0	0	0	0	0	0	0	0	0	0	0	0
1555	Quercetin 3-(6''''-ferulylsophorotrioside)	COc1cc(C=CC(=O)OCC2OC(OC3C(OC4C(Oc5c(-c6ccc(O)c(O)c6)oc6cc(O)cc(O)c6c5=O)OC(CO)C(O)C4O)OC(CO)C(O)C3O)C(O)C(O)C2O)ccc1O	0	0	0	0	0	0	0	0	0	0	0	0	0	0	0	0	0	0	0	0	0	0	0	0	0	0	0	0	0	0	0	0	0	0	0	0	0	0	0	0	0	0	0	0	0	0	0
1556	Quercetin 3-(6''''-sinapylsophorotrioside)	COc1cc(C=CC(=O)OCC2OC(OC3C(OC4C(Oc5c(-c6ccc(O)c(O)c6)oc6cc(O)cc(O)c6c5=O)OC(CO)C(O)C4O)OC(CO)C(O)C3O)C(O)C(O)C2O)cc(OC)c1O	0	0	0	0	0	0	0	0	0	0	0	0	0	0	0	0	0	0	0	0	0	0	0	0	0	0	0	0	0	0	0	0	0	0	0	0	0	0	0	0	0	0	0	0	0	0	0
1557	3'-Deoxyderhamnosylmaysin	CC1OC(c2c(O)cc3oc(-c4ccc(O)cc4)cc(=O)c3c2O)C(O)C(O)C1=O	0	0	0	0	0	0	0	0	0	0	0	0	0	0	0	0	0	0	0	0	0	0	0	0	0	0	0	0	0	0	0	0	0	0	0	0	0	0	0	0	0	0	0	0	0	0	0
1558	Carlinoside	O=c1cc(-c2ccc(O)c(O)c2)oc2c(C3OCC(O)C(O)C3O)c(O)c(C3OC(CO)C(O)C(O)C3O)c(O)c12	0	0	0	0	0	0	0	0	0	0	0	0	0	0	0	0	0	0	0	0	0	0	0	0	0	0	0	0	0	0	0	0	0	0	0	0	0	0	0	0	0	0	0	0	0	0	0
1560	Isoswertisin 4'-rhamnoside	COc1cc(O)c2c(=O)cc(-c3ccc(OC4OC(C)C(O)C(O)C4O)cc3)oc2c1C1OC(CO)C(O)C(O)C1O	0	0	0	0	0	0	0	0	0	0	0	0	0	0	0	0	0	0	0	0	0	0	0	0	0	0	0	0	0	0	0	0	0	0	0	0	0	0	0	0	0	0	0	0	0	0	0
1561	Derhamnosylmaysin	CC1OC(c2c(O)cc3oc(-c4ccc(O)c(O)c4)cc(=O)c3c2O)C(O)C(O)C1=O	0	0	0	0	0	0	0	0	0	0	0	0	0	0	0	0	0	0	0	0	0	0	0	0	0	0	0	0	0	0	0	0	0	0	0	0	0	0	0	0	0	0	0	0	0	0	0
1562	3'-O-Methylderhamnosylmaysin	COc1cc(-c2cc(=O)c3c(O)c(C4OC(C)C(=O)C(O)C4O)c(O)cc3o2)ccc1O	0	0	0	0	0	0	0	0	0	0	0	0	0	0	0	0	0	0	0	0	0	0	0	0	0	0	0	0	0	0	0	0	0	0	0	0	0	0	0	0	0	0	0	0	0	0	0
1563	6,8-Di-C-beta-D-arabinopyranosylapigenin	O=c1cc(-c2ccc(O)cc2)oc2c(C3OCC(O)C(O)C3O)c(O)c(C3OCC(O)C(O)C3O)c(O)c12	0	0	0	0	0	0	0	0	0	0	0	0	0	0	0	0	0	0	0	0	0	0	0	0	0	0	0	0	0	0	0	0	0	0	0	0	0	0	0	0	0	0	0	0	0	0	0
1565	Apigeninidin	Oc1ccc(-c2ccc3c(O)cc(O)cc3[o+]2)cc1.[Cl-]	0	0	0	0	0	0	0	0	0	0	0	0	0	0	0	0	0	0	0	0	0	0	0	0	0	0	0	0	0	0	0	0	0	0	0	0	0	0	0	0	0	0	0	0	0	0	0
1566	Cyanidin 3-O-(2"-xylosyl-6"-glucosyl-galactoside)	OCC1OC(OCC2OC(Oc3cc4c(O)cc(O)cc4[o+]c3-c3ccc(O)c(O)c3)C(OCC3OC(O)C(O)C3O)C(O)C2O)C(O)C(O)C1O	0	0	0	0	0	0	0	0	0	0	0	0	0	0	0	0	0	0	0	0	0	0	0	0	0	0	0	0	0	0	0	0	0	0	0	0	0	0	0	0	0	0	0	0	0	0	0
1569	Apigeninidin 5-(5''-caffeylarabinoside)	O=C(C=Cc1ccc(O)c(O)c1)OCC1OC(Oc2cc(O)cc3[o+]c(-c4ccc(O)cc4)ccc23)C(O)C1O	0	0	0	0	0	0	0	0	0	0	0	0	0	0	0	0	0	0	0	0	0	0	0	0	0	0	0	0	0	0	0	0	0	0	0	0	0	0	0	0	0	0	0	0	0	0	0
1570	Pelargonidin 3-p-coumarylglucoside	O=C(C=Cc1ccc(O)cc1)OCC1OC(Oc2cc3c(O)cc(O)cc3[o+]c2-c2ccc(O)cc2)C(O)C(O)C1O	0	0	0	0	0	0	0	0	0	0	0	0	0	0	0	0	0	0	0	0	0	0	0	0	0	0	0	0	0	0	0	0	0	0	0	0	0	0	0	0	0	0	0	0	0	0	0
1571	Cyanidin 3-(6''-acetylglucoside)	CC(=O)OCC1OC(Oc2cc3c(O)cc(O)cc3[o+]c2-c2ccc(O)c(O)c2)C(O)C(O)C1O	0	0	0	0	0	0	0	0	0	0	0	0	0	0	0	0	0	0	0	0	0	0	0	0	0	0	0	0	0	0	0	0	0	0	0	0	0	0	0	0	0	0	0	0	0	0	0
1572	Cyanidin 3-(3''-malonylglucoside)	O=C(O)CC(=O)OC1C(O)C(CO)OC(Oc2cc3c(O)cc(O)cc3[o+]c2-c2ccc(O)c(O)c2)C1O	0	0	0	0	0	0	0	0	0	0	0	0	0	0	0	0	0	0	0	0	0	0	0	0	0	0	0	0	0	0	0	0	0	0	0	0	0	0	0	0	0	0	0	0	0	0	0
1573	Cyanidin 3-(3'',6''-dimalonylglucoside)	O=C(O)CC(=O)OCC1OC(Oc2cc3c(O)cc(O)cc3[o+]c2-c2ccc(O)c(O)c2)C(O)C(OC(=O)CC(=O)O)C1O	0	0	0	0	0	0	0	0	0	0	0	0	0	0	0	0	0	0	0	0	0	0	0	0	0	0	0	0	0	0	0	0	0	0	0	0	0	0	0	0	0	0	0	0	0	0	0
1574	Cyanidin 3-(6''-malonyllaminaribioside)	O=C(O)CC(=O)OCC1OC(Oc2cc3c(O)cc(O)cc3[o+]c2-c2ccc(O)c(O)c2)C(O)C(OC2OC(CO)C(O)C(O)C2O)C1O	0	0	0	0	0	0	0	0	0	0	0	0	0	0	0	0	0	0	0	0	0	0	0	0	0	0	0	0	0	0	0	0	0	0	0	0	0	0	0	0	0	0	0	0	0	0	0
1575	Cyanidin 3-O-(2"-xylosyl-6"-(6"'-p-hydroxybenzoyl-glucosyl)-galactoside)	O=C(OCC1OC(OCC2OC(Oc3cc4c(O)cc(O)cc4[o+]c3-c3ccc(O)c(O)c3)C(OCC3OC(O)C(O)C3O)C(O)C2O)C(O)C(O)C1O)c1ccc(O)cc1	0	0	0	0	0	0	0	0	0	0	0	0	0	0	0	0	0	0	0	0	0	0	0	0	0	0	0	0	0	0	0	0	0	0	0	0	0	0	0	0	0	0	0	0	0	0	0
1576	Cyanidin 3-O-(2"-xylosyl-6"-(6"'-p-coumaroyl-glucosyl)-galactoside)	O=C(C=Cc1ccc(O)cc1)OCC1OC(OCC2OC(Oc3cc4c(O)cc(O)cc4[o+]c3-c3ccc(O)c(O)c3)C(OCC3OC(O)C(O)C3O)C(O)C2O)C(O)C(O)C1O	0	0	0	0	0	0	0	0	0	0	0	0	0	0	0	0	0	0	0	0	0	0	0	0	0	0	0	0	0	0	0	0	0	0	0	0	0	0	0	0	0	0	0	0	0	0	0
1577	Cyanidin 3-(6''-p-coumarylsophoroside) 5-glucoside	O=C(C=Cc1ccc(O)cc1)OCC1OC(Oc2cc3c(OC4OC(CO)C(O)C(O)C4O)cc(O)cc3[o+]c2-c2ccc(O)c(O)c2)C(OC2OC(CO)C(O)C(O)C2O)C(O)C1O	0	0	0	0	0	0	0	0	0	0	0	0	0	0	0	0	0	0	0	0	0	0	0	0	0	0	0	0	0	0	0	0	0	0	0	0	0	0	0	0	0	0	0	0	0	0	0
1578	Cyanidin 3-(6''-caffeylsophoroside) 5-glucoside	O=C(C=Cc1ccc(O)c(O)c1)OCC1OC(Oc2cc3c(OC4OC(CO)C(O)C(O)C4O)cc(O)cc3[o+]c2-c2ccc(O)c(O)c2)C(OC2OC(CO)C(O)C(O)C2O)C(O)C1O	0	0	0	0	0	0	0	0	0	0	0	0	0	0	0	0	0	0	0	0	0	0	0	0	0	0	0	0	0	0	0	0	0	0	0	0	0	0	0	0	0	0	0	0	0	0	0
1579	Cyanidin 3-[6''-(4-glucosyl-p-coumaryl)sophoroside] 5-glucoside	O=C(C=Cc1ccc(OC2OC(CO)C(O)C(O)C2O)cc1)OCC1OC(Oc2cc3c(OC4OC(CO)C(O)C(O)C4O)cc(O)cc3[o+]c2-c2ccc(O)c(O)c2)C(OC2OC(CO)C(O)C(O)C2O)C(O)C1O	0	0	0	0	0	0	0	0	0	0	0	0	0	0	0	0	0	0	0	0	0	0	0	0	0	0	0	0	0	0	0	0	0	0	0	0	0	0	0	0	0	0	0	0	0	0	0
1580	Cyanidin 3-(6'',6'''-dicaffeylsophoroside) 5-glucoside	O=C(C=Cc1ccc(O)c(O)c1)OCC1OC(OC2C(Oc3cc4c(OC5OC(CO)C(O)C(O)C5O)cc(O)cc4[o+]c3-c3ccc(O)c(O)c3)OC(COC(=O)C=Cc3ccc(O)c(O)c3)C(O)C2O)C(O)C(O)C1O	0	0	0	0	0	0	0	0	0	0	0	0	0	0	0	0	0	0	0	0	0	0	0	0	0	0	0	0	0	0	0	0	0	0	0	0	0	0	0	0	0	0	0	0	0	0	0
1581	Cyanidin 3-(6''-caffeyl-6'''-ferulylsophoroside) 5-glucoside	COc1cc(C=CC(=O)OCC2OC(OC3C(Oc4cc5c(OC6OC(CO)C(O)C(O)C6O)cc(O)cc5[o+]c4-c4ccc(O)c(O)c4)OC(COC(=O)C=Cc4ccc(O)c(O)c4)C(O)C3O)C(O)C(O)C2O)ccc1O	0	0	0	0	0	0	0	0	0	0	0	0	0	0	0	0	0	0	0	0	0	0	0	0	0	0	0	0	0	0	0	0	0	0	0	0	0	0	0	0	0	0	0	0	0	0	0
1583	Peonidin 3-(6''-acetyl-glucoside)	COc1cc(-c2[o+]c3cc(O)cc(O)c3cc2OC2OC(COC(C)=O)C(O)C(O)C2O)ccc1O	0	0	0	0	0	0	0	0	0	0	0	0	0	0	0	0	0	0	0	0	0	0	0	0	0	0	0	0	0	0	0	0	0	0	0	0	0	0	0	0	0	0	0	0	0	0	0
1584	Peonidin 3-(6''-caffeoyl-glucoside)	COc1cc(-c2[o+]c3cc(O)cc(O)c3cc2OC2OC(COC(=O)C=Cc3ccc(O)c(O)c3)C(O)C(O)C2O)ccc1O	0	0	0	0	0	0	0	0	0	0	0	0	0	0	0	0	0	0	0	0	0	0	0	0	0	0	0	0	0	0	0	0	0	0	0	0	0	0	0	0	0	0	0	0	0	0	0
1585	Peonidin acetyl 3,5-diglucoside	COc1cc(-c2[o+]c3cc(O)cc(OC4OC(CO)C(O)C(O)C4O)c3cc2OC2OC(COC(C)=O)C(O)C(O)C2O)ccc1O	0	0	0	0	0	0	0	0	0	0	0	0	0	0	0	0	0	0	0	0	0	0	0	0	0	0	0	0	0	0	0	0	0	0	0	0	0	0	0	0	0	0	0	0	0	0	0
1586	Peonidin 3-(6''-malonyl-glucoside) 5-glucoside	COc1cc(-c2[o+]c3cc(O)cc(OC4OC(CO)C(O)C(O)C4O)c3cc2OC2OC(COC(=O)CC(=O)O)C(O)C(O)C2O)ccc1O	0	0	0	0	0	0	0	0	0	0	0	0	0	0	0	0	0	0	0	0	0	0	0	0	0	0	0	0	0	0	0	0	0	0	0	0	0	0	0	0	0	0	0	0	0	0	0
1587	Peonidin 3-feruloyl-diglucoside 5-glucoside	COc1ccc(C=CC(=O)OCC2OC(Oc3cc4c(OC5OC(CO)C(O)C(O)C5O)cc(O)cc4[o+]c3-c3ccc(O)c(OC)c3)C(OC3OC(CO)C(O)C(O)C3O)C(O)C2O)cc1O	0	0	0	0	0	0	0	0	0	0	0	0	0	0	0	0	0	0	0	0	0	0	0	0	0	0	0	0	0	0	0	0	0	0	0	0	0	0	0	0	0	0	0	0	0	0	0
1588	Peonidin 3-caffeoyl-rutinoside 5-glucoside	COc1cc(-c2[o+]c3cc(O)cc(OC4OC(CO)C(O)C(O)C4O)c3cc2OC2OC(COC3OC(C)C(OC(=O)C=Cc4ccc(O)c(O)c4)C(O)C3O)C(O)C(O)C2O)ccc1O	0	0	0	0	0	0	0	0	0	0	0	0	0	0	0	0	0	0	0	0	0	0	0	0	0	0	0	0	0	0	0	0	0	0	0	0	0	0	0	0	0	0	0	0	0	0	0
1589	Delphinidin 3-caffeoylglucoside	O=C(C=Cc1ccc(O)c(O)c1)OCC1OC(Oc2cc3c(O)cc(O)cc3[o+]c2-c2cc(O)c(O)c(O)c2)C(O)C(O)C1O	0	0	0	0	0	0	0	0	0	0	0	0	0	0	0	0	0	0	0	0	0	0	0	0	0	0	0	0	0	0	0	0	0	0	0	0	0	1	0	0	0	0	0	0	0	0	0
1590	Dimalonylawobanin	O=C(O)CC(=O)OCC1OC(Oc2cc(O)cc3[o+]c(-c4cc(O)c(O)c(O)c4)c(OC4OC(COC(=O)C=Cc5ccc(O)cc5)C(O)C(O)C4O)cc23)C(O)C(O)C1OC(=O)CC(=O)O	0	0	0	0	0	0	0	0	0	0	0	0	0	0	0	0	0	0	0	0	0	0	0	0	0	0	0	0	0	0	0	0	0	0	0	0	0	1	0	0	0	0	0	0	0	0	0
1591	Petunidin 3-(6''-acetylglucoside)	COc1cc(-c2[o+]c3cc(O)cc(O)c3cc2OC2OC(COC(C)=O)C(O)C(O)C2O)cc(O)c1O	0	0	0	0	0	0	0	0	0	0	0	0	0	0	0	0	0	0	0	0	0	0	0	0	0	0	0	0	0	0	0	0	0	0	0	0	0	0	0	0	0	0	0	0	0	0	0
1592	Petunidin 3-(4'''-p-coumaroyl-rutinoside)	COc1cc(-c2[o+]c3cc(O)cc(O)c3cc2OC2OC(COC3OC(C)C(OC(=O)C=Cc4ccc(O)cc4)C(O)C3O)C(O)C(O)C2O)cc(O)c1O	0	0	0	0	0	0	0	0	0	0	0	0	0	0	0	0	0	0	0	0	0	0	0	0	0	0	0	0	0	0	0	0	0	0	0	0	0	0	0	0	0	0	0	0	0	0	0
1593	Malvidin 3-(6''-p-coumarylglucoside)	COc1cc(-c2[o+]c3cc(O)cc(O)c3cc2OC2OC(COC(=O)C=Cc3ccc(O)cc3)C(O)C(O)C2O)cc(OC)c1O	0	0	0	0	0	0	0	0	0	0	0	0	0	0	0	0	0	0	0	0	0	0	0	0	0	0	0	0	0	0	0	0	0	0	0	0	0	0	0	0	0	0	0	0	0	0	0
1594	Malvidin 3-(6''-p-caffeyglucoside)	COc1cc(-c2[o+]c3cc(O)cc(O)c3cc2OC2OC(COC(=O)C=Cc3ccc(O)c(O)c3)C(O)C(O)C2O)cc(OC)c1O	0	0	0	0	0	0	0	0	0	0	0	0	0	0	0	0	0	0	0	0	0	0	0	0	0	0	0	0	0	0	0	0	0	0	0	0	0	0	0	0	0	0	0	0	0	0	0
1595	Malvidin 3-(6''-p-coumarylglucoside) 5-dimalonylglucoside	COc1cc(-c2[o+]c3cc(O)cc(OC4OC(COC(=O)CC(=O)O)C(OC(=O)CC(=O)O)C(O)C4O)c3cc2OC2OC(COC(=O)C=Cc3ccc(O)cc3)C(O)C(O)C2O)cc(OC)c1O	0	0	0	0	0	0	0	0	0	0	0	0	0	0	0	0	0	0	0	0	0	0	0	0	0	0	0	0	0	0	0	0	0	0	0	0	0	0	0	0	0	0	0	0	0	0	0
1596	Cerasin	O=C1C=Cc2ccccc2C1=NNc1ccc(N=Nc2ccccc2)cc1	0	0	0	0	0	0	0	0	0	0	0	0	0	0	0	0	0	0	0	0	0	0	0	0	0	0	0	0	0	0	0	0	0	0	0	0	0	0	0	0	0	0	0	0	0	0	0
1597	Cerasidin	COc1ccc(C=CC(=O)c2c(O)cc(OC)cc2OC)c(OC)c1	0	0	0	0	0	0	0	0	0	0	0	0	0	0	0	0	0	0	0	0	0	0	0	0	0	0	0	0	0	0	0	0	0	0	0	0	0	0	0	0	0	0	0	0	0	0	0
1598	4-Hydroxyderricin	COc1ccc(C(=O)C=Cc2ccc(O)cc2)c(O)c1CC=C(C)C	0	0	0	0	0	0	0	0	0	0	0	0	0	0	0	0	0	0	0	0	0	0	0	0	0	0	0	0	0	0	0	0	0	0	0	0	0	0	0	0	0	0	0	0	0	0	0
1599	Xanthoangelol D	C=C(C)C(O)Cc1c(OC)ccc(C(=O)C=Cc2ccc(O)cc2)c1O	0	0	0	0	0	0	0	0	0	0	0	0	0	0	0	0	0	0	0	0	0	0	0	0	0	0	0	0	0	0	0	0	0	0	0	0	0	0	0	0	0	0	0	0	0	0	0
1600	Xanthoangelol E	C=C(C)C(Cc1c(OC)ccc(C(=O)C=Cc2ccc(O)cc2)c1O)OO	0	0	0	0	0	0	1	0	0	0	0	0	0	0	0	0	0	0	0	0	0	0	0	0	0	0	0	0	0	0	0	0	0	0	0	0	0	0	0	0	0	0	0	0	0	0	0
1601	Xanthoangelol	CC(C)=CCCC(C)=CCc1c(O)ccc(C(=O)C=Cc2ccc(O)cc2)c1O	0	0	0	0	0	0	0	0	0	0	0	0	0	0	0	0	0	0	0	0	0	0	0	0	0	0	0	0	0	0	0	0	0	0	0	0	0	0	0	0	0	0	0	0	0	0	0
1602	Xanthoangelol B	C=C(C)C(O)CCC(C)=CCc1c(O)ccc(C(=O)C=Cc2ccc(O)cc2)c1O	0	0	0	0	0	0	0	0	0	0	0	0	0	0	0	0	0	0	0	0	0	0	0	0	0	0	0	0	0	0	0	0	0	0	0	0	0	0	0	0	0	0	0	0	0	0	0
1603	Xanthoangelol C	CC(=CCc1c(O)ccc(C(=O)C=Cc2ccc(O)cc2)c1O)CCC=O	0	0	0	0	0	0	0	0	0	0	0	0	0	0	0	0	0	0	0	0	0	0	0	0	0	0	0	0	0	0	0	0	0	0	0	0	0	0	0	0	0	0	0	0	0	0	0
1604	Xanthosine	O=c1[nH]c(=O)c2ncn(C3OC(CO)C(O)C3O)c2[nH]1	0	0	0	0	0	0	0	0	0	0	0	0	0	0	0	0	0	0	0	0	0	0	0	0	0	0	0	0	0	0	0	0	0	0	0	0	0	0	0	0	0	0	0	0	0	0	0
1605	Gibberellin A116	C=C1CC23CC1CCC2C1(C)CCCC(C)(C(=O)O)C1C3C(=O)O	0	0	0	0	0	0	0	0	0	0	0	0	0	0	0	0	0	0	0	0	0	0	0	0	0	0	0	0	0	0	0	0	0	0	0	0	0	0	0	0	0	0	0	0	0	0	0
1606	Malonyl CoA	CC(C)(COP(=O)(O)OP(=O)(O)OCC1OC(n2cnc3c(N)ncnc32)C(O)C1OP(=O)(O)O)C(O)C(=O)NCCC(=O)NCCSC(=O)CC(=O)O	0	0	0	0	0	0	0	0	0	0	0	0	0	0	0	0	0	0	0	0	0	0	0	0	0	0	0	0	0	0	0	0	1	0	0	0	0	0	0	0	0	0	0	0	0	1	0
1607	Cinnamoyl-CoA	CC(C)(COP(=O)(O)OP(=O)(O)OCC1OC(n2cnc3c(N)ncnc32)C(O)C1OP(=O)(O)O)C(O)C(=O)NCCC(=O)NCCSC(=O)C=Cc1ccccc1	0	0	0	0	0	0	0	0	0	0	0	0	0	0	0	0	0	0	0	0	0	0	0	0	0	0	0	0	0	0	0	0	0	0	0	0	0	0	0	0	0	0	0	0	0	1	0
1608	4-Coumaroyl-CoA	CC(C)(COP(=O)(O)OP(=O)(O)OCC1OC(n2cnc3c(N)ncnc32)C(O)C1OP(=O)(O)O)C(O)C(=O)NCCC(=O)NCCSC(=O)C=Cc1ccc(O)cc1	0	0	0	0	0	0	0	0	0	0	0	0	0	0	0	0	0	0	0	0	0	0	0	0	0	0	0	0	0	0	0	0	0	0	0	0	0	0	0	0	0	0	0	0	0	1	0
1609	Glucoalyssin	CS(=O)CCCCCC(=NOS(=O)(=O)[O-])SC1OC(CO)C(O)C(O)C1O	0	0	0	0	0	0	0	0	0	0	0	0	0	0	0	0	0	0	0	0	0	0	0	0	0	0	0	0	0	0	0	0	0	0	0	0	0	0	0	0	0	0	0	0	0	0	0
1610	8-Methylsulfinyloctyl glucosinolate	CS(=O)CCCCCCCCC(=NOS(=O)(=O)O)SC1OC(CO)C(O)C(O)C1O	0	0	0	0	0	0	0	0	0	0	0	0	0	0	0	0	0	0	0	0	0	0	0	0	0	0	0	0	0	0	0	1	0	0	0	0	0	0	0	0	0	0	0	0	0	0	0
1611	16-Hydroxy-hexadecanoic acid	O=C(O)CCCCCCCCCCCCCCCO	0	0	0	0	0	0	0	0	0	0	0	0	0	0	0	0	0	0	0	0	0	0	0	0	0	0	0	0	0	0	0	1	0	0	0	0	0	0	0	0	0	0	0	0	0	0	0
1612	Sucrose 6-phosphate	O=P(O)(O)OCC1OC(OC2(CO)OC(CO)C(O)C2O)C(O)C(O)C1O	0	0	0	0	0	0	0	0	0	0	0	0	0	0	0	0	0	0	0	0	0	0	0	0	0	0	0	0	0	0	0	0	0	0	0	0	0	0	0	0	0	0	0	0	0	0	0
1613	Allantoin	NC(=O)NC1NC(=O)NC1=O	0	0	0	0	0	0	0	0	0	0	0	0	0	0	0	0	0	0	0	0	0	0	0	0	0	0	0	0	0	0	0	0	0	0	0	0	0	0	0	0	0	0	0	0	0	0	0
1614	D-Erythrose 4-phosphate	O=CC(O)C(O)COP(=O)(O)O	0	0	0	0	0	0	0	0	0	0	0	0	0	0	0	0	0	0	0	0	0	0	0	0	0	0	0	0	0	0	0	0	0	0	0	0	0	0	0	0	0	0	0	0	0	0	0
1615	D-Ribose 5-phosphate	O=P(O)(O)OCC1OC(O)C(O)C1O	0	0	0	0	0	0	0	0	0	0	0	0	0	0	0	0	0	0	0	0	0	0	0	0	0	0	0	0	0	0	0	0	0	0	0	0	0	0	0	0	0	0	0	0	0	0	0
1616	5-Hydroxyisourate	O=C1N=C2NC(=O)NC(=O)C2(O)N1	0	0	0	0	0	0	0	0	0	0	0	0	0	0	0	0	0	0	0	0	0	0	0	0	0	0	0	0	0	0	0	0	0	0	0	0	0	0	0	0	0	0	0	0	0	0	0
1617	2-Oxo-4-hydroxy-4-carboxy-5-ureidoimidazole	NC(=O)NC1=NC(=O)NC1(O)C(=O)O	0	0	0	0	0	0	0	0	0	0	0	0	0	0	0	0	0	0	0	0	0	0	0	0	0	0	0	0	0	0	0	0	0	0	0	0	0	0	0	0	0	0	0	0	0	0	0
1618	Dihydroxyacetone phosphate	O=C(CO)COP(=O)(O)O	0	0	0	0	0	0	0	0	0	0	0	0	0	0	0	0	0	0	0	0	0	0	0	0	0	0	0	0	0	0	0	0	0	0	0	0	0	0	0	0	0	0	0	0	0	0	0
1619	D-Glyceraldehyde 3-phosphate	O=CC(O)COP(=O)(O)O	0	0	0	0	0	0	0	0	0	0	0	0	0	0	0	0	0	0	0	0	0	0	0	0	0	0	0	0	0	0	0	0	0	0	0	0	0	0	0	0	0	0	0	0	0	0	0
1620	7-Methylxanthosine	Cn1c[n+](C2OC(CO)C(O)C2O)c2[nH]c(=O)[nH]c(=O)c21	0	0	0	0	0	0	0	0	0	0	0	0	0	0	0	0	0	0	0	0	0	0	0	0	0	0	0	0	0	0	0	0	0	0	0	0	0	0	0	0	0	0	0	0	0	0	0
1621	5-Methylthiopentylglucosinolate	CSCCCCCC(=NOS(=O)(=O)O)SC1OC(CO)C(O)C(O)C1O	0	0	0	0	0	0	0	0	0	0	0	0	0	0	0	0	0	0	0	0	0	0	0	0	0	0	0	0	0	0	0	0	0	0	0	0	0	0	0	0	0	0	0	0	0	0	0
1622	4-Metyl-5-(beta-hydroxyethyl)thiazole phosphate	Cc1ncsc1CCOP(=O)(O)O	0	0	0	0	0	0	0	0	0	0	0	0	0	0	0	0	0	0	0	0	0	0	0	0	0	0	0	0	0	0	0	0	0	0	0	0	0	0	0	0	0	0	0	0	0	0	0
1623	4-Amino-5-hydroxymethyl-2-methylpyrimidine diphosphate	Cc1ncc(CO)c(N)n1.O=P(O)(O)OP(=O)(O)O	0	0	0	0	0	0	0	0	0	0	0	0	0	0	0	0	0	0	0	0	0	0	0	0	0	0	0	0	0	0	0	0	0	0	0	0	0	0	0	0	0	0	0	0	0	1	0
1625	n-Hexyl glucosinolate	CCCCCCC(=NOS(=O)(=O)O)SC1OC(CO)C(O)C(O)C1O	0	0	0	0	0	0	0	0	0	0	0	0	0	0	0	0	0	0	0	0	0	0	0	0	0	0	0	0	0	0	0	0	0	0	0	0	0	0	0	0	0	0	0	0	0	0	0
1626	2-Hydroxyethyl glucosinolate	O=S(=O)(O)ON=C(CCO)SC1OC(CO)C(O)C(O)C1O	0	0	0	0	0	0	0	0	0	0	0	0	0	0	0	0	0	0	0	0	0	0	0	0	0	0	0	0	0	0	0	0	0	0	0	0	0	0	0	0	0	0	0	0	0	0	0
1627	4-Methylsulfonyl-3-butenyl glucosinolate	CS(=O)(=O)C=CCCC(=NOS(=O)(=O)O)SC1OC(CO)C(O)C(O)C1O	0	0	0	0	0	0	0	0	0	0	0	0	0	0	0	0	0	0	0	0	0	0	0	0	0	0	0	0	0	0	0	0	0	0	0	0	0	0	0	0	0	0	0	0	0	0	0
1628	5-Oxoheptyl glucosinolate	CCC(=O)CCCCC(=NOS(O)(O)O)SC1OC(CO)C(O)C(O)C1O	0	0	0	0	0	0	0	0	0	0	0	0	0	0	0	0	0	0	0	0	0	0	0	0	0	0	0	0	0	0	0	0	0	0	0	0	0	0	0	0	0	0	0	0	0	0	0
1630	Aromadendrin 3-galactoside	O=C1c2c(O)cc(O)cc2OC(c2ccc(O)cc2)C1OC1OC(CO)C(O)C(O)C1O	0	0	0	0	0	0	0	0	0	0	0	0	0	0	0	0	0	0	0	0	0	0	0	0	0	0	0	0	0	0	0	0	0	0	0	0	0	0	0	0	0	0	0	0	0	0	0
1632	Gallocatechin 3'-gallate	O=C(Oc1cc(C2Oc3cc(O)cc(O)c3CC2O)cc(O)c1O)c1cc(O)c(O)c(O)c1	0	0	0	0	0	0	0	0	0	0	0	0	0	0	0	0	0	0	0	0	0	0	0	0	0	0	0	0	0	0	0	0	0	0	0	0	0	1	0	0	0	0	0	0	0	0	0
1634	Epigallocatechin 3-caffeate	O=C(C=Cc1ccc(O)c(O)c1)OC1Cc2c(O)cc(O)cc2OC1c1cc(O)c(O)c(O)c1	0	0	0	0	0	0	0	0	0	0	0	0	0	0	0	0	0	0	0	0	0	0	0	0	0	0	0	0	0	0	0	0	0	0	0	0	0	1	0	0	0	0	0	0	0	0	0
1635	Catechin-(4alpha->8)-gallocatechin-(4alpha->8)-gallocatechin	Oc1cc(O)c2c(c1)OC(c1ccc(O)c(O)c1)C(O)C2c1c(O)cc(O)c2c1OC(c1cc(O)c(O)c(O)c1)C(O)C2c1c(O)cc(O)c2c1OC(c1cc(O)c(O)c(O)c1)C(O)C2	0	0	0	0	0	0	0	0	0	0	0	0	0	0	0	0	0	0	0	0	0	0	0	0	0	0	0	0	0	0	0	0	0	0	0	0	0	1	0	0	0	0	0	0	0	0	0
1636	Epicatechin-(4beta->6)-catechin 3-gallate	O=C(OC1C(c2ccc(O)c(O)c2)Oc2cc(O)cc(O)c2C1c1c(O)cc2c(c1O)CC(O)C(c1ccc(O)c(O)c1)O2)c1cc(O)c(O)c(O)c1	0	0	0	0	0	0	0	0	0	0	0	0	0	0	0	0	0	0	0	0	0	0	0	0	0	0	0	0	0	0	0	0	0	0	0	0	0	1	0	0	0	0	0	0	0	0	0
1637	Procyanidin B2 3-gallate	O=C(OC1C(c2ccc(O)c(O)c2)Oc2cc(O)cc(O)c2C1c1c(O)cc(O)c2c1OC(c1ccc(O)c(O)c1)C(O)C2)c1cc(O)c(O)c(O)c1	0	0	0	0	0	0	0	0	0	0	0	0	0	0	0	0	0	0	0	0	0	0	0	0	0	0	0	0	0	0	0	0	0	0	0	0	0	1	0	0	0	0	0	0	0	0	0
1638	Catechin-(4alpha->8)-epicatechin 3'-gallate	O=C(OC1Cc2c(O)cc(O)c(C3c4c(O)cc(O)cc4OC(c4ccc(O)c(O)c4)C3O)c2OC1c1ccc(O)c(O)c1)c1cc(O)c(O)c(O)c1	0	0	0	0	0	0	0	0	0	0	0	0	0	0	0	0	0	0	0	0	0	0	0	0	0	0	0	0	0	0	0	0	0	0	0	0	0	1	0	0	0	0	0	0	0	0	0
1639	Epicatechin-(4beta->8)-catechin 3-gallate	O=C(OC1C(c2ccc(O)c(O)c2)Oc2cc(O)cc(O)c2C1c1c(O)cc(O)c2c1OC(c1ccc(O)c(O)c1)C(O)C2)c1cc(O)c(O)c(O)c1	0	0	0	0	0	0	0	0	0	0	0	0	0	0	0	0	0	0	0	0	0	0	0	0	0	0	0	0	0	0	0	0	0	0	0	0	0	1	0	0	0	0	0	0	0	0	0
1640	Epicatechin-(4beta->8)-epicatechin 3'-gallate	O=C(OC1Cc2c(O)cc(O)c(C3c4c(O)cc(O)cc4OC(c4ccc(O)c(O)c4)C3O)c2OC1c1ccc(O)c(O)c1)c1cc(O)c(O)c(O)c1	0	0	0	0	0	0	0	0	0	0	0	0	0	0	0	0	0	0	0	0	0	0	0	0	0	0	0	0	0	0	0	0	0	0	0	0	0	1	0	0	0	0	0	0	0	0	0
1641	[Epicatechin-(4beta->8)]2-epicatechin 3'''-gallate	O=C(OC1Cc2c(O)cc(O)c(C3c4c(O)cc(O)c(C5c6c(O)cc(O)cc6OC(c6ccc(O)c(O)c6)C5O)c4OC(c4ccc(O)c(O)c4)C3O)c2OC1c1ccc(O)c(O)c1)c1cc(O)c(O)c(O)c1	0	0	0	0	0	0	0	0	0	0	0	0	0	0	0	0	0	0	0	0	0	0	0	0	0	0	0	0	0	0	0	0	0	0	0	0	0	1	0	0	0	0	0	0	0	0	0
1642	Epicatechin-(4beta->8)-epicatechin-(4beta->8)-catechin 3''-gallate	O=C(OC1C(c2ccc(O)c(O)c2)Oc2c(C3c4c(O)cc(O)cc4OC(c4ccc(O)c(O)c4)C3O)c(O)cc(O)c2C1c1c(O)cc(O)c2c1OC(c1ccc(O)c(O)c1)C(O)C2)c1cc(O)c(O)c(O)c1	0	0	0	0	0	0	0	0	0	0	0	0	0	0	0	0	0	0	0	0	0	0	0	0	0	0	0	0	0	0	0	0	0	0	0	0	0	1	0	0	0	0	0	0	0	0	0
1643	ent-Epiafzelechin-(2alpha->7,4alpha->8)-catechin	Oc1ccc(C23Oc4cc(O)cc(O)c4C(c4c(cc(O)c5c4OC(c4ccc(O)c(O)c4)C(O)C5)O2)C3O)cc1	0	0	0	0	0	0	0	0	0	0	0	0	0	0	0	0	0	0	0	0	0	0	0	0	0	0	0	0	0	0	0	0	0	0	0	0	0	0	0	0	0	0	0	0	0	0	0
1645	Epicatechin-(2beta->7,4beta->8)-epicatechin-(4beta->8)-epicatechin-(4beta->6)-catechin	Oc1cc(O)c2c(c1)OC1(c3ccc(O)c(O)c3)Oc3cc(O)c4c(c3C2C1O)OC(c1ccc(O)c(O)c1)C(O)C4c1c(O)cc(O)c2c1OC(c1ccc(O)c(O)c1)C(O)C2c1c(O)cc2c(c1O)CC(O)C(c1ccc(O)c(O)c1)O2	0	0	0	0	0	0	0	0	0	0	0	0	0	0	0	0	0	0	0	0	0	0	0	0	0	0	0	0	0	0	0	0	0	0	0	0	0	0	0	0	0	0	0	0	0	0	0
1646	Epicatechin-(2beta->7,4beta->8)-[epicatechin-(4beta->8)]2-catechin	Oc1cc(O)c2c(c1)OC1(c3ccc(O)c(O)c3)Oc3cc(O)c4c(c3C2C1O)OC(c1ccc(O)c(O)c1)C(O)C4c1c(O)cc(O)c2c1OC(c1ccc(O)c(O)c1)C(O)C2c1c(O)cc(O)c2c1OC(c1ccc(O)c(O)c1)C(O)C2	0	0	0	0	0	0	0	0	0	0	0	0	0	0	0	0	0	0	0	0	0	0	0	0	0	0	0	0	0	0	0	0	0	0	0	0	0	0	0	0	0	0	0	0	0	0	0
1647	ent-Epicatechin-(2alpha->7,4alpha->8)-epicatechin 3-arabinoside	Oc1cc(O)c2c(c1)OC1(c3ccc(O)c(O)c3)Oc3cc(O)c4c(c3C2C1OC1OCC(O)C(O)C1O)OC(c1ccc(O)c(O)c1)C(O)C4	0	0	0	0	0	0	0	0	0	0	0	0	0	0	0	0	0	0	0	0	0	0	0	0	0	0	0	0	0	0	0	0	0	0	0	0	0	0	0	0	0	0	0	0	0	0	0
1648	ent-Epicatechin-(2alpha->7,4alpha->8)-epicatechin 3-galactoside	OCC1OC(OC2C3c4c(O)cc(O)cc4OC2(c2ccc(O)c(O)c2)Oc2cc(O)c4c(c23)OC(c2ccc(O)c(O)c2)C(O)C4)C(O)C(O)C1O	0	0	0	0	0	0	0	0	0	0	0	0	0	0	0	0	0	0	0	0	0	0	0	0	0	0	0	0	0	0	0	0	0	0	0	0	0	0	0	0	0	0	0	0	0	0	0
1649	Eugenigrandin A	O=C1OCC2OC(=O)c3cc(O)c(O)c(O)c3-c3c(O)c(O)c(O)c4c3C(=O)OC(C2OC(=O)c2cc(O)c(O)c(O)c2-c2c1cc(O)c(O)c2O)C1OC(=O)c2c-4c(O)c(O)c(O)c2C1c1c(O)cc(O)c2c1OC(c1cc(O)c(O)c(O)c1)C(O)C2	0	0	0	0	0	0	0	0	0	0	0	0	0	0	0	0	0	0	0	0	0	0	0	0	0	0	0	0	0	0	0	0	0	0	0	0	0	1	0	0	0	0	0	0	0	0	0
1650	5-O-Methylgenistein	COc1cc(O)cc2occ(-c3ccc(O)cc3)c(=O)c12	0	0	0	0	0	0	0	0	0	0	0	0	0	0	0	0	0	0	0	0	0	0	0	0	0	0	0	0	0	0	0	0	0	0	0	0	0	0	0	0	0	0	0	0	0	0	0
1651	Anhydropisatin	COc1ccc2c(c1)OCc1c-2oc2cc3c(cc12)OCO3	0	0	0	0	0	0	0	0	0	0	0	0	0	0	0	0	0	0	0	0	0	0	0	0	0	0	0	0	0	0	0	0	0	0	0	0	0	0	0	0	0	0	0	0	0	0	0
1652	7,8,2',4'-Tetrahydroxyisoflavone	O=c1c(-c2ccc(O)cc2O)coc2c(O)c(O)ccc12	0	0	0	0	0	0	0	0	0	0	0	0	0	0	0	0	0	0	0	0	0	0	0	0	0	0	0	0	0	0	0	0	0	0	0	0	0	0	0	0	0	0	0	0	0	0	0
1653	(+)-Dihydrowighteone	CC(C)=CCc1c(O)cc2c(c1O)C(=O)C(c1ccc(O)cc1)CO2	0	0	0	0	0	0	0	0	0	0	0	0	0	0	0	0	0	0	0	0	0	0	0	0	0	0	0	0	0	0	0	0	0	0	0	0	0	0	0	0	0	0	0	0	0	0	0
1654	3'-Dimethylallylkievitone	CC(C)=CCc1c(O)ccc(C2COc3c(CC=C(C)C)c(O)cc(O)c3C2=O)c1O	0	0	0	0	0	0	0	0	0	0	0	0	0	0	0	0	0	0	0	0	0	0	0	0	0	0	0	0	0	0	0	0	0	0	0	0	0	0	0	0	0	0	0	0	0	0	0
1655	2-Prenyl-6alpha-hydroxyphaseollidin	CC(C)=CCc1cc2c(cc1O)OCC1(O)c3ccc(O)c(CC=C(C)C)c3OC21	0	0	0	0	0	0	0	0	0	0	0	0	0	0	0	0	0	0	0	0	0	0	0	0	0	0	0	0	0	0	0	0	0	0	0	0	0	0	0	0	0	0	0	0	0	0	0
1656	Demethyltexasin 4'-O-glucoside	O=c1c(-c2ccc(OC3OC(CO)C(O)C(O)C3O)cc2)coc2cc(O)c(O)cc12	0	0	0	0	0	0	0	0	0	0	0	0	0	0	0	0	0	0	0	0	0	0	0	0	0	0	0	0	0	0	0	0	0	0	0	0	0	0	0	0	0	0	0	0	0	0	0
1657	Hastatoside	COC(=O)C1=COC(OC2OC(CO)C(O)C(O)C2O)C2C(C)CC(=O)C12O	0	0	0	0	0	0	0	0	0	0	0	0	0	0	0	0	0	0	0	0	0	0	0	0	0	0	0	0	0	0	0	0	0	0	0	0	0	0	0	0	0	0	0	0	0	0	0
1658	2-Isopropylcyclopentanone	CC(C)C1CCCC1=O	0	0	0	0	0	0	0	0	0	0	0	0	0	0	0	0	0	0	0	0	0	0	0	0	0	0	0	0	0	0	0	0	0	0	0	0	0	0	0	0	0	0	0	0	0	0	0
1659	(R)-Linden ether	CC1=CC2OCC(C)=C2CC1	0	0	0	0	0	0	0	0	0	0	0	0	0	0	0	0	0	0	0	0	0	0	0	0	0	0	0	0	0	0	0	0	0	0	0	0	0	0	0	0	0	0	0	0	0	0	0
1660	(1R,2R,4R,5S)-(+)-p-Menthane-2,5-diol	CC(C)C1CC(O)C(O)CC1O	0	0	0	0	0	0	0	0	0	0	0	0	0	0	0	0	0	0	0	0	0	0	0	0	0	0	0	0	0	0	0	0	0	0	0	0	0	0	0	0	0	0	0	0	0	0	0
1661	p-Menth-4(8)-en-3-ol	CC(C)=C1CCC(C)CC1O	0	0	0	0	0	0	0	0	0	0	0	0	0	0	0	0	0	0	0	0	0	0	0	0	0	0	0	0	0	0	0	0	0	0	0	0	0	0	0	0	0	0	0	0	0	0	0
1662	5-Carboxypyranocyanidin 3-O-beta-glucopyranoside	O=C(O)c1cc2c(OC3OC(CO)C(O)C(O)C3O)c(-c3ccc(O)c(O)c3)[o+]c3cc(O)cc(o1)c32	0	0	0	0	0	0	0	0	0	0	0	0	0	0	0	0	0	0	0	0	0	0	0	0	0	0	0	0	0	0	0	0	0	0	0	0	0	0	0	0	0	0	0	0	0	0	0
1663	5-Carboxypyranocyanidin 3-O-(6''-O-malonyl-beta-glucopyranoside)	O=C(O)CC(=O)OCC1OC(Oc2c(-c3ccc(O)c(O)c3)[o+]c3cc(O)cc4oc(C(=O)O)cc2c43)C(O)C(O)C1O	0	0	0	0	0	0	0	0	0	0	0	0	0	0	0	0	0	0	0	0	0	0	0	0	0	0	0	0	0	0	0	0	0	0	0	0	0	0	0	0	0	0	0	0	0	0	0
1665	cis-Resveratrol-3,4'-O-beta-diglucoside	OCC1OC(O)C(O)C(O)C1O.OCC1OC(Oc2ccc(C=Cc3cc(O)cc(O)c3)cc2)C(O)C(O)C1O	0	0	0	0	0	0	0	0	0	0	0	0	0	0	0	0	0	0	0	0	0	0	0	0	0	0	0	0	0	0	0	0	0	0	0	0	0	0	0	0	0	0	0	0	0	0	0
1666	trans-p-Feruloyl-beta-D-glucopyranoside	COc1cc(C=CC(=O)OC2OC(CO)C(O)C(O)C2O)ccc1O	0	0	0	0	0	0	0	0	0	0	0	0	0	0	0	0	0	0	0	0	0	0	0	0	0	0	0	0	0	0	0	0	0	0	0	0	0	0	0	0	0	0	0	0	0	0	0
1667	trans-p-Ferulyl alcohol 4-O-[6-(2-methyl-3-hydroxypropionyl)] glucopyranoside	COc1cc(C=CCO)ccc1OC1OC(COC(=O)C(C)CO)C(O)C(O)C1O	0	0	0	0	0	0	0	0	0	0	0	0	0	0	0	0	0	0	0	0	0	0	0	0	0	0	0	0	0	0	0	0	0	0	0	0	0	0	0	0	0	0	0	0	0	0	0
1668	Luteolin 7-O-(2-apiofuranosyl-4-glucopyranosyl-6-malonyl)glucopyranoside	O=C(O)CC(=O)OCC1OC(Oc2cc(O)c3c(=O)cc(-c4ccc(O)c(O)c4)oc3c2)C(OC2OCC(O)(CO)C2O)C(O)C1OC1OC(CO)C(O)C(O)C1O	0	0	0	0	0	0	0	0	0	0	0	0	0	0	0	0	0	0	0	0	0	0	0	0	0	0	0	0	0	0	0	0	0	0	0	0	0	0	0	0	0	0	0	0	0	0	0
1674	(-)-alpha-Curcumene	C=CCCC(C)c1ccc(C)cc1	0	0	0	0	0	0	0	0	0	0	0	0	0	0	0	0	0	0	0	0	0	0	0	0	0	0	0	0	0	0	0	0	0	0	0	0	0	0	0	0	0	0	0	0	0	0	0
1675	Arctiol	C=C1CCCC2(C)CC(O)C(C(C)(C)C)CC12	0	0	0	0	0	0	0	0	0	0	0	0	0	0	0	0	0	0	0	0	0	0	0	0	0	0	0	0	0	0	0	0	0	0	0	0	0	0	0	0	0	0	0	0	0	0	0
1677	Luteolin 7-glucoside 3'-glucuronide	O=C(O)C1OC(Oc2cc(-c3cc(=O)c4c(O)cc(OC5OC(CO)C(O)C(O)C5O)cc4o3)ccc2O)C(O)C(O)C1O	0	0	0	0	0	0	0	0	0	0	0	0	0	0	0	0	0	0	0	0	0	0	0	0	0	0	0	0	0	0	0	0	0	0	0	0	0	0	0	0	0	0	0	0	0	0	0
1678	Kaempferol 3-alpha-D-arabinopyranoside	O=c1c(OC2OCC(O)C(O)C2O)c(-c2ccc(O)cc2)oc2cc(O)cc(O)c12	0	0	0	0	0	0	0	0	0	0	0	0	0	0	0	0	0	0	0	0	0	0	0	0	0	0	0	0	0	0	0	0	0	0	0	0	0	0	0	0	0	0	0	0	0	0	0
1679	Kaempferol 3-rhamnosyl-(1->3)-rhamnosyl-(1->6)-glucoside	CC1OC(OC2C(O)C(C)OC(OCC3OC(Oc4c(-c5ccc(O)cc5)oc5cc(O)cc(O)c5c4=O)C(O)C(O)C3O)C2O)C(O)C(O)C1O	0	0	0	0	0	0	0	0	0	0	0	0	0	0	0	0	0	0	0	0	0	0	0	0	0	0	0	0	0	0	0	0	0	0	0	0	0	0	0	0	0	0	0	0	0	0	0
1680	Kaempferol 7-(3G-glucosylgentiobioside)	O=c1c(O)c(-c2ccc(O)cc2)oc2cc(OC3OC(COC4OC(CO)C(O)C(O)C4O)C(O)C(OC4OC(CO)C(O)C(O)C4O)C3O)cc(O)c12	0	0	0	0	0	0	0	0	0	0	0	0	0	0	0	0	0	0	0	0	0	0	0	0	0	0	0	0	0	0	0	0	0	0	0	0	0	0	0	0	0	0	0	0	0	0	0
1682	Kaempferol 3-(2''-(E)-feruloylgalactosyl-(1->4)-glucoside)	COc1cc(C=CC(=O)OC2C(OC3C(CO)OC(Oc4c(-c5ccc(O)cc5)oc5cc(O)cc(O)c5c4=O)C(O)C3O)OC(CO)C(O)C2O)ccc1O	0	0	0	0	0	0	0	0	0	0	0	0	0	0	0	0	0	0	0	0	0	0	0	0	0	0	0	0	0	0	0	0	0	0	0	0	0	0	0	0	0	0	0	0	0	0	0
1683	Kaempferol 3-rhamnosyl-(1->3)(4'''-acetylrhamnosyl)(1->6)-glucoside	CC(=O)OC1C(C)OC(OCC2OC(Oc3c(-c4ccc(O)cc4)oc4cc(O)cc(O)c4c3=O)C(O)C(O)C2O)C(O)C1OC1OC(C)C(O)C(O)C1O	0	0	0	0	0	0	0	0	0	0	0	0	0	0	0	0	0	0	0	0	0	0	0	0	0	0	0	0	0	0	0	0	0	0	0	0	0	0	0	0	0	0	0	0	0	0	0
1684	Kaempferol 3-glucosyl-(1->2)-(6''-acetylgalactoside)-7-glucoside	CC(=O)OCC1OC(Oc2c(-c3ccc(O)cc3)oc3cc(OC4OC(CO)C(O)C(O)C4O)cc(O)c3c2=O)C(OC2OC(CO)C(O)C(O)C2O)C(O)C1O	0	0	0	0	0	0	0	0	0	0	0	0	0	0	0	0	0	0	0	0	0	0	0	0	0	0	0	0	0	0	0	0	0	0	0	0	0	0	0	0	0	0	0	0	0	0	0
1686	Quercetin 3-glucosyl-(1->2)-galactoside 7-glucoside	O=c1c(OC2OC(CO)C(O)C(O)C2OC2OC(CO)C(O)C(O)C2O)c(-c2ccc(O)c(O)c2)oc2cc(OC3OC(CO)C(O)C(O)C3O)cc(O)c12	0	0	0	0	0	0	0	0	0	0	0	0	0	0	0	0	0	0	0	0	0	0	0	0	0	0	0	0	0	0	0	0	0	0	0	0	0	0	0	0	0	0	0	0	0	0	0
1688	3,4'-Dimethyquercetin 7-[alpha-L-arabinofuranosyl-(1->6)-glucoside]	COc1ccc(-c2oc3cc(OC4OC(COC5OC(CO)C(O)C5O)C(O)C(O)C4O)cc(O)c3c(=O)c2OC)cc1O	0	0	0	0	0	0	0	0	0	0	0	0	0	0	0	0	0	0	0	0	0	0	0	0	0	0	0	0	0	0	0	0	0	0	0	0	0	0	0	0	0	0	0	0	0	0	0
1691	5,4'-Dihydrox-3-methoxy-6,7-methylenedioxyflavone 4'-glucuronide	COc1c(-c2ccc(OC3OC(C(=O)O)C(O)C(O)C3O)cc2)oc2cc3c(c(O)c2c1=O)OCO3	0	0	0	0	0	0	0	0	0	0	0	0	0	0	0	0	0	0	0	0	0	0	0	0	0	0	0	0	0	0	0	0	0	0	0	0	0	0	0	0	0	0	0	0	0	0	0
1692	Cucumerin B	CC(c1ccc(O)cc1)c1c(O)c(C2OC(CO)C(O)C(O)C2O)c(O)c2c(=O)cc(-c3ccc(O)cc3)oc12	0	0	0	0	0	0	0	0	0	0	0	0	0	0	0	0	0	0	0	0	0	0	0	0	0	0	0	0	0	0	0	0	0	0	0	0	0	0	0	0	0	0	0	0	0	0	0
1693	Cucumerin A	CC(c1ccc(O)cc1)c1c(O)c(C2OC(CO)C(O)C(O)C2O)c2oc(-c3ccc(O)cc3)cc(=O)c2c1O	0	0	0	0	0	0	0	0	0	0	0	0	0	0	0	0	0	0	0	0	0	0	0	0	0	0	0	0	0	0	0	0	0	0	0	0	0	0	0	0	0	0	0	0	0	0	0
1694	6-C-beta-D-Glucopyranosyl-5,7,2',4',5'-pentahydroxyflavone	O=c1cc(-c2cc(O)c(O)cc2O)oc2cc(O)c(C3OC(CO)C(O)C(O)C3O)c(O)c12	0	0	0	0	0	0	0	0	0	0	0	0	0	0	0	0	0	0	0	0	0	0	0	0	0	0	0	0	0	0	0	0	0	0	0	0	0	0	1	0	0	0	0	0	0	0	0
1695	Pelargonidin 3-O-[2-O-(6-(E)-feruloyl-beta-D-glucopyranosyl)-6-O-(E)-feruloyl-beta-D-glucopyranoside] 5-O-(beta-D-glucopyranoside)	COc1cc(C=CC(=O)OCC2OC(OC3C(Oc4cc5c(OC6OC(CO)C(O)C(O)C6O)cc(O)cc5[o+]c4-c4ccc(O)cc4)OC(COC(=O)C=Cc4ccc(O)c(OC)c4)C(O)C3O)C(O)C(O)C2O)ccc1O	0	0	0	0	0	0	0	0	0	0	0	0	0	0	0	0	0	0	0	0	0	0	0	0	0	0	0	0	0	0	0	0	0	0	0	0	0	0	0	0	0	0	0	0	0	0	0
1696	Isovitexin 6''-rhamnoside	CC1OC(OCC2OC(c3c(O)cc4oc(-c5ccc(O)cc5)cc(=O)c4c3O)C(O)C(O)C2O)C(O)C(O)C1O	0	0	0	0	0	0	0	0	0	0	0	0	0	0	0	0	0	0	0	0	0	0	0	0	0	0	0	0	0	0	0	0	0	0	0	0	0	0	0	0	0	0	0	0	0	0	0
1697	Isoorientin 2''-arabinoside	O=c1cc(-c2ccc(O)c(O)c2)oc2cc(O)c(C3OC(CO)C(O)C(O)C3OC3OCC(O)C(O)C3O)c(O)c12	0	0	0	0	0	0	0	0	0	0	0	0	0	0	0	0	0	0	0	0	0	0	0	0	0	0	0	0	0	0	0	0	0	0	0	0	0	0	0	0	0	0	0	0	0	0	0
1698	2''-O-alpha-L-Rhamnosyl-6-C-fucosyl-luteolin	CC1OC(OC2C(c3c(O)cc4oc(-c5ccc(O)c(O)c5)cc(=O)c4c3O)OC(C)C(O)C2O)C(O)C(O)C1O	0	0	0	0	0	0	0	0	0	0	0	0	0	0	0	0	0	0	0	0	0	0	0	0	0	0	0	0	0	0	0	0	0	0	0	0	0	0	0	0	0	0	0	0	0	0	0
1699	2''-O-alpha-L-Rhamnosyl-6-C-quinovopyranosyl-luteolin	CC1OC(OC2C(c3c(O)cc4oc(-c5ccc(O)c(O)c5)cc(=O)c4c3O)OC(C)C(O)C2O)C(O)C(O)C1O	0	0	0	0	0	0	0	0	0	0	0	0	0	0	0	0	0	0	0	0	0	0	0	0	0	0	0	0	0	0	0	0	0	0	0	0	0	0	0	0	0	0	0	0	0	0	0
1700	2''-O-alpha-L-Rhamnosyl-6-C-fucosyl-3'-methoxyluteolin	COc1cc(-c2cc(=O)c3c(O)c(C4OC(C)C(O)C(O)C4OC4OC(C)C(O)C(O)C4O)c(O)cc3o2)ccc1O	0	0	0	0	0	0	0	0	0	0	0	0	0	0	0	0	0	0	0	0	0	0	0	0	0	0	0	0	0	0	0	0	0	0	0	0	0	0	0	0	0	0	0	0	0	0	0
1701	Isovitexin 7-(6'''-(E)-p-coumaroylglucoside)	O=C(C=Cc1ccc(O)cc1)OCC1OC(Oc2cc3oc(-c4ccc(O)cc4)cc(=O)c3c(O)c2C2OC(CO)C(O)C(O)C2O)C(O)C(O)C1O	0	0	0	0	0	0	0	0	0	0	0	0	0	0	0	0	0	0	0	0	0	0	0	0	0	0	0	0	0	0	0	0	0	0	0	0	0	0	0	0	0	0	0	0	0	0	0
1702	Isovitexin 7-(6'''-(E)-p-feruloylglucoside)	COc1cc(C=CC(=O)OCC2OC(Oc3cc4oc(-c5ccc(O)cc5)cc(=O)c4c(O)c3C3OC(CO)C(O)C(O)C3O)C(O)C(O)C2O)ccc1O	0	0	0	0	0	0	0	0	0	0	0	0	0	0	0	0	0	0	0	0	0	0	0	0	0	0	0	0	0	0	0	0	0	0	0	0	0	0	0	0	0	0	0	0	0	0	0
1703	Isovitexin 2''-(6'''-(E)-p-coumaroylglucoside)	O=C(C=Cc1ccc(O)cc1)OCC1OC(OC2C(c3c(O)cc4oc(-c5ccc(O)cc5)cc(=O)c4c3O)OC(CO)C(O)C2O)C(O)C(O)C1O	0	0	0	0	0	0	0	0	0	0	0	0	0	0	0	0	0	0	0	0	0	0	0	0	0	0	0	0	0	0	0	0	0	0	0	0	0	0	0	0	0	0	0	0	0	0	0
1704	Isovitexin 2''-(6'''-(E)-p-coumaroylglucoside) 4'-glucoside	O=C(C=Cc1ccc(O)cc1)OCC1OC(OC2C(c3c(O)cc4oc(-c5ccc(OC6OC(CO)C(O)C(O)C6O)cc5)cc(=O)c4c3O)OC(CO)C(O)C2O)C(O)C(O)C1O	0	0	0	0	0	0	0	0	0	0	0	0	0	0	0	0	0	0	0	0	0	0	0	0	0	0	0	0	0	0	0	0	0	0	0	0	0	0	0	0	0	0	0	0	0	0	0
1705	Isovitexin 2''-(6'''-(E)-feruloylglucoside) 4'-glucoside	COc1cc(C=CC(=O)OCC2OC(OC3C(c4c(O)cc5oc(-c6ccc(OC7OC(CO)C(O)C(O)C7O)cc6)cc(=O)c5c4O)OC(CO)C(O)C3O)C(O)C(O)C2O)ccc1O	0	0	0	0	0	0	0	0	0	0	0	0	0	0	0	0	0	0	0	0	0	0	0	0	0	0	0	0	0	0	0	0	0	0	0	0	0	0	0	0	0	0	0	0	0	0	0
1706	Vitexin 6''-O-malonyl 2''-O-xyloside	O=c1cc(-c2ccc(O)cc2)oc2c(C3OC(CO)C(O)C(O)C3O)c(O)cc(O)c12	0	0	0	0	0	0	0	0	0	0	0	0	0	0	0	0	0	0	0	0	0	0	0	0	0	0	0	0	0	0	0	0	0	0	0	0	0	0	0	0	0	0	0	0	0	0	0
1707	Isoorientin 7-O-(6'''-O-(E)-feruloyl)glucoside	O=c1cc(-c2ccc(O)c(O)c2)oc2cc(O)c(C3OC(CO)C(O)C(O)C3O)c(O)c12	0	0	0	0	0	0	0	0	0	0	0	0	0	0	0	0	0	0	0	0	0	0	0	0	0	0	0	0	0	0	0	0	0	0	0	0	0	0	0	0	0	0	0	0	0	0	0
1708	Isoscoparin 4'-glucoside	COc1cc(-c2cc(=O)c3c(O)c(C4OC(CO)C(O)C(O)C4O)c(O)cc3o2)ccc1OC1OC(CO)C(O)C(O)C1O	0	0	0	0	0	0	0	0	0	0	0	0	0	0	0	0	0	0	0	0	0	0	0	0	0	0	0	0	0	0	0	0	0	0	0	0	0	0	0	0	0	0	0	0	0	0	0
1709	Isosakuranetin 7-[arabinosyl-(1->6)-glucoside]	COc1ccc(C2CC(=O)c3c(O)cc(OC4OC(COC5OC(CO)C(O)C5O)C(O)C(O)C4O)cc3O2)cc1	0	0	0	0	0	0	0	0	0	0	0	0	0	0	0	0	0	0	0	0	0	0	0	0	0	0	0	0	0	0	0	0	0	0	0	0	0	0	0	0	0	0	0	0	0	0	0
1710	5,6,7,4'-Tetrahydroxyflavanone 6,7-diglucoside	O=C1CC(c2ccc(O)cc2)Oc2cc(OC3OC(CO)C(O)C(O)C3O)c(OC3OC(CO)C(O)C(O)C3O)c(O)c21	0	0	0	0	0	0	0	0	0	0	0	0	0	0	0	0	0	0	0	0	0	0	0	0	0	0	0	0	0	0	0	0	0	0	0	0	0	0	0	0	0	0	0	0	0	0	0
1711	5,7,3',4'-Tetrahydroxyflavanone 7-alpha-L-arabinofuranosyl-(1->6)-glucoside	CN1C2=CC3(OC2C(C)(C)c2ccccc21)N(C)c1ccccc1C3(C)C	0	0	0	0	0	0	0	0	0	0	0	0	0	0	0	0	0	0	0	0	0	0	0	0	0	0	0	0	0	0	0	0	0	0	0	0	0	0	0	0	0	0	0	0	0	0	0
1713	Xanthoangelol F	COc1ccc(C(=O)C=Cc2ccc(O)cc2)c(O)c1CC=C(C)CCC=C(C)C	0	0	0	0	0	0	0	0	0	0	0	0	0	0	0	0	0	0	0	0	0	0	0	0	0	0	0	0	0	0	0	0	0	0	0	0	0	0	0	0	0	0	0	0	0	0	0
1714	Xanthoangelol G	C=C(C)C(O)CCC(C)=CCc1c(OC)ccc(C(=O)C=Cc2ccc(O)cc2)c1O	0	0	0	0	0	0	0	0	0	0	0	0	0	0	0	0	0	0	0	0	0	0	0	0	0	0	0	0	0	0	0	0	0	0	0	0	0	0	0	0	0	0	0	0	0	0	0
1715	Xanthoangelol H	COc1ccc(C(=O)C=Cc2ccc(O)cc2)c2c1CC(O)C(C)(C)O2	0	0	0	0	0	0	0	0	0	0	0	0	0	0	0	0	0	0	0	0	0	0	0	0	0	0	0	0	0	0	0	0	0	0	0	0	0	0	0	0	0	0	0	0	0	0	0
1716	Tinctormine	CC(=O)NC(CSNN=C1N=CN=C1C(N)=O)C(=O)O	0	0	0	0	0	0	0	0	0	0	0	0	0	0	0	0	0	0	0	0	0	0	0	0	0	0	0	0	0	0	0	0	0	0	0	0	0	0	0	0	0	0	0	0	0	0	0
1717	2'-Hydroxy-4'-methoxydihydrochalcone	COc1ccc(C(=O)CCc2ccccc2)c(O)c1	0	0	0	0	0	0	0	0	0	0	0	0	0	0	0	0	0	0	0	0	0	0	0	0	0	0	0	0	0	0	0	0	0	0	0	0	0	0	0	0	0	0	0	0	0	0	0
1718	2'-Methoxy-4'-hydroxydihydrochalcone	COc1cc(O)ccc1C(=O)CCc1ccccc1	0	0	0	0	0	0	0	0	0	0	0	0	0	0	0	0	0	0	0	0	0	0	0	0	0	0	0	0	0	0	0	0	0	0	0	0	0	0	0	0	0	0	0	0	0	0	0
1719	Cyanidin 3-(3-glucosyl-6-malonylglucoside) 4'-glucoside	C=C(O)CC(=C)OCC1OC(Oc2cc3c(O)cc(O)cc3[o+]c2-c2ccc(OC3OC(CO)C(O)C(O)C3O)c(O)c2)C(O)C(OC2OC(CO)C(O)C(O)C2O)C1O	0	0	0	0	0	0	0	0	0	0	0	0	0	0	0	0	0	0	0	0	0	0	0	0	0	0	0	0	0	0	0	0	0	0	0	0	0	0	0	0	0	0	0	0	0	0	0
1720	Cyanidin 7-(3-glucosyl-6-malonylglucoside) 4'-glucoside	C=C(O)CC(=C)OCC1OC(Oc2cc(O)c3cc(O)c(-c4ccc(OC5OC(CO)C(O)C(O)C5O)c(O)c4)[o+]c3c2)C(O)C(OC2OC(CO)C(O)C(O)C2O)C1O	0	0	0	0	0	0	0	0	0	0	0	0	0	0	0	0	0	0	0	0	0	0	0	0	0	0	0	0	0	0	0	0	0	0	0	0	0	0	0	0	0	0	0	0	0	0	0
1721	Delphinidin 3-[6-(4-(Z)-p-coumarylrhamnosyl)glucoside] 5-glucoside	CC1OC(OCC2OC(Oc3cc4c(OC5OC(CO)C(O)C(O)C5O)cc(O)cc4[o+]c3-c3cc(O)c(O)c(O)c3)C(O)C(O)C2O)C(O)C(O)C1OC(=O)C=Cc1ccc(O)cc1	0	0	0	0	0	0	0	0	0	0	0	0	0	0	0	0	0	0	0	0	0	0	0	0	0	0	0	0	0	0	0	0	0	0	0	0	0	1	0	0	0	0	0	0	0	0	0
1723	Delphinidin 3-glucoside 5-(6''-malonylglucoside)	O=C(O)CC(=O)OCC1OC(Oc2cc(O)cc3[o+]c(-c4cc(O)c(O)c(O)c4)c(OC4OC(CO)C(O)C(O)C4O)cc23)C(O)C(O)C1O	0	0	0	0	0	0	0	0	0	0	0	0	0	0	0	0	0	0	0	0	0	0	0	0	0	0	0	0	0	0	0	0	0	0	0	0	0	1	0	0	0	0	0	0	0	0	0
1724	Malvidin 3-(6-(4-feruloyl-alpha-rhamnosyl)-beta-glucoside) 5-beta-glucoside	COc1cc(C=CC(=O)OC2C(C)OC(OCC3OC(Oc4cc5c(OC6OC(CO)C(O)C(O)C6O)cc(O)cc5[o+]c4-c4cc(OC)c(O)c(OC)c4)C(O)C(O)C3O)C(O)C2O)ccc1O	0	0	0	0	0	0	0	0	0	0	0	0	0	0	0	0	0	0	0	0	0	0	0	0	0	0	0	0	0	0	0	0	0	0	0	0	0	0	0	0	0	0	0	0	0	0	0
1725	Pelargonidin 3-O-[2-O-(6-O-(E)-feruloyl-beta-D-glucopyranosyl)-beta-D-glucopyranoside] 5-O-(beta-D-glucopyranoside)	COc1cc(C=CC(=O)OCC2OC(OC3C(Oc4cc5c(OC6OC(CO)C(O)C(O)C6O)cc(O)cc5[o+]c4-c4ccc(O)cc4)OC(CO)C(O)C3O)C(O)C(O)C2O)ccc1O	0	0	0	0	0	0	0	0	0	0	0	0	0	0	0	0	0	0	0	0	0	0	0	0	0	0	0	0	0	0	0	0	0	0	0	0	0	0	0	0	0	0	0	0	0	0	0
1726	Pelargonidin 3-O-[2-O-(6-(E)-caffeoyl-beta-D-glucopyranosyl)-6-O-(E)-caffeoyl-beta-D-glucopyranoside] 5-O-(beta-D-glucopyranoside)	O=C(C=Cc1ccc(O)c(O)c1)OCC1OC(OC2C(Oc3cc4c(OC5OC(CO)C(O)C(O)C5O)cc(O)cc4[o+]c3-c3ccc(O)cc3)OC(COC(=O)C=Cc3ccc(O)c(O)c3)C(O)C2O)C(O)C(O)C1O	0	0	0	0	0	0	0	0	0	0	0	0	0	0	0	0	0	0	0	0	0	0	0	0	0	0	0	0	0	0	0	0	0	0	0	0	0	0	0	0	0	0	0	0	0	0	0
1727	Pelargonidin 3-O-[2-O-(6-(E)-feruloyl-beta-D-glucopyranosyl)-6-O-(E)-caffeoyl-beta-D-glucopyranoside] 5-O-(beta-D-glucopyranoside)	COc1cc(C=CC(=O)OCC2OC(OC3C(Oc4cc5c(OC6OC(CO)C(O)C(O)C6O)cc(O)cc5[o+]c4-c4ccc(O)cc4)OC(COC(=O)C=Cc4ccc(O)c(O)c4)C(O)C3O)C(O)C(O)C2O)ccc1O	0	0	0	0	0	0	0	0	0	0	0	0	0	0	0	0	0	0	0	0	0	0	0	0	0	0	0	0	0	0	0	0	0	0	0	0	0	0	0	0	0	0	0	0	0	0	0
1728	Pelargonidin 3-O-[2-O-beta-D-glucopyranosyl-6-O-(E)-p-coumaroyl-beta-D-glucopyranoside] 5-O-(beta-D-glucopyranoside)	O=C(C=Cc1ccc(O)cc1)OCC1OC(Oc2cc3c(OC4OC(CO)C(O)C(O)C4O)cc(O)cc3[o+]c2-c2ccc(O)cc2)C(OC2OC(CO)C(O)C(O)C2O)C(O)C1O	0	0	0	0	0	0	0	0	0	0	0	0	0	0	0	0	0	0	0	0	0	0	0	0	0	0	0	0	0	0	0	0	0	0	0	0	0	0	0	0	0	0	0	0	0	0	0
1729	Pelargonidin 3-O-[2-O-(6-(E)-caffeoyl-beta-D-glucopyranosyl)-6-O-(E)-p-coumaroyl-beta-D-glucopyranoside] 5-O-(beta-D-glucopyranoside)	O=C(C=Cc1ccc(O)c(O)c1)OCC1OC(OC2C(Oc3cc4c(OC5OC(CO)C(O)C(O)C5O)cc(O)cc4[o+]c3-c3ccc(O)cc3)OC(COC(=O)C=Cc3ccc(O)cc3)C(O)C2O)C(O)C(O)C1O	0	0	0	0	0	0	0	0	0	0	0	0	0	0	0	0	0	0	0	0	0	0	0	0	0	0	0	0	0	0	0	0	0	0	0	0	0	0	0	0	0	0	0	0	0	0	0
1730	Pelargonidin 3-O-[2-O-(6-(E)-caffeoyl-beta-D-glucopyranosyl)-6-O-(E)-feruloyl-beta-D-glucopyranoside] 5-O-(beta-D-glucopyranoside)	COc1cc(C=CC(=O)OCC2OC(Oc3cc4c(OC5OC(CO)C(O)C(O)C5O)cc(O)cc4[o+]c3-c3ccc(O)cc3)C(OC3OC(COC(=O)C=Cc4ccc(O)c(O)c4)C(O)C(O)C3O)C(O)C2O)ccc1O	0	0	0	0	0	0	0	0	0	0	0	0	0	0	0	0	0	0	0	0	0	0	0	0	0	0	0	0	0	0	0	0	0	0	0	0	0	0	0	0	0	0	0	0	0	0	0
1731	Pelargonidin 3-O-[2-O-(6-(E)-feruloyl-beta-D-glucopyranosyl)-6-O-(E)-p-coumaroyl-beta-D-glucopyranoside] 5-O-(beta-D-glucopyranoside)	COc1cc(C=CC(=O)OCC2OC(OC3C(Oc4cc5c(OC6OC(CO)C(O)C(O)C6O)cc(O)cc5[o+]c4-c4ccc(O)cc4)OC(COC(=O)C=Cc4ccc(O)cc4)C(O)C3O)C(O)C(O)C2O)ccc1O	0	0	0	0	0	0	0	0	0	0	0	0	0	0	0	0	0	0	0	0	0	0	0	0	0	0	0	0	0	0	0	0	0	0	0	0	0	0	0	0	0	0	0	0	0	0	0
1732	Pelargonidin 3-O-[2-O-(2-(E)-feruloyl-beta-D-glucopyranosyl)-6-O-(E)-feruloyl-beta-D-glucopyranoside] 5-O-(beta-D-glucopyranoside)	COc1cc(C=CC(=O)OCC2OC(Oc3cc4c(OC5OC(CO)C(O)C(O)C5O)cc(O)cc4[o+]c3-c3ccc(O)cc3)C(OC3OC(CO)C(O)C(O)C3OC(=O)C=Cc3ccc(O)c(OC)c3)C(O)C2O)ccc1O	0	0	0	0	0	0	0	0	0	0	0	0	0	0	0	0	0	0	0	0	0	0	0	0	0	0	0	0	0	0	0	0	0	0	0	0	0	0	0	0	0	0	0	0	0	0	0
1733	Petunidin 3-O-[6-O-(4-O-(E)-caffeoyl-O-alpha-rhamnopyranosyl)-beta-glucopyranoside]-5-O-beta-glucopyranoside	COc1cc(-c2[o+]c3cc(O)cc(OC4OC(CO)C(O)C(O)C4O)c3cc2OC2OC(COC3OC(C)C(OC(=O)C=Cc4ccc(O)c(O)c4)C(O)C3O)C(O)C(O)C2O)cc(O)c1O	0	0	0	0	0	0	0	0	0	0	0	0	0	0	0	0	0	0	0	0	0	0	0	0	0	0	0	0	0	0	0	0	0	0	0	0	0	0	0	0	0	0	0	0	0	0	0
1734	Petunidin 3-O-[6-O-(4-O-(4-O-(beta-D-glucopyranosyl)-feruloyl)-alpha-L-rhamnopyranosyl)-beta-D-glucopyranoside]- 5-O-[beta-D-glucopyranoside]	COc1ccc(C=CC(=O)OC2C(C)OC(OCC3OC(Oc4cc5c(OC6OC(CO)C(O)C(O)C6O)cc(O)cc5[o+]c4-c4cc(O)c(O)c(OC)c4)C(O)C(O)C3O)C(O)C2O)cc1O	0	0	0	0	0	0	0	0	0	0	0	0	0	0	0	0	0	0	0	0	0	0	0	0	0	0	0	0	0	0	0	0	0	0	0	0	0	0	0	0	0	0	0	0	0	0	0
1735	(Cyanidin 3-O-(3-O-acetyl-beta-glucoside) (kaempferol 3-O-(2-O-beta-glucosyl-beta-glucoside)-7-O-beta-glucosiduronic acid) malonate	O=C(O)OC1C(O)C(COC(=O)CC(=O)OC2C(Oc3cc(O)c4c(=O)c(OC5OC(CO)C(O)C(O)C5OC5OC(CO)C(O)C(O)C5O)c(-c5ccc(O)cc5)oc4c3)OC(C(=O)O)C(O)C2O)OC(Oc2cc3c(O)cc(O)cc3[o+]c2-c2ccc(O)c(O)c2)C1O	0	0	0	0	0	0	0	0	0	0	0	0	0	0	0	0	0	0	0	0	0	0	0	0	0	0	0	0	0	0	0	0	0	0	0	0	0	0	0	0	0	0	0	0	0	0	0
1736	(Cyanidin 3-O-beta-glucoside)(kaempferol 3-O-(2-O-beta-glucosyl-beta-glucoside)-7-O-beta-glucosiduronic acid) malonate	O=C(CC(=O)OC1C(Oc2cc(O)c3c(=O)c(OC4OC(CO)C(O)C(O)C4OC4OC(CO)C(O)C(O)C4O)c(-c4ccc(O)cc4)oc3c2)OC(C(=O)O)C(O)C1O)OCC1OC(Oc2cc3c(O)cc(O)cc3[o+]c2-c2ccc(O)c(O)c2)C(O)C(O)C1O	0	0	0	0	0	0	0	0	0	0	0	0	0	0	0	0	0	0	0	0	0	0	0	0	0	0	0	0	0	0	0	0	0	0	0	0	0	0	0	0	0	0	0	0	0	0	0
1737	5-Carboxypyranopelargonidin 3-O-beta-glucopyranoside	O=C(O)c1cc2c(OC3OC(CO)C(O)C(O)C3O)c(-c3ccc(O)cc3)[o+]c3cc(O)cc(o1)c32	0	0	0	0	0	0	0	0	0	0	0	0	0	0	0	0	0	0	0	0	0	0	0	0	0	0	0	0	0	0	0	0	0	0	0	0	0	0	0	0	0	0	0	0	0	0	0
1738	Epiafzelechin-(4alpha->8)-pelargonidin 3'-glucoside	OCC1OC(Oc2cc3c(O)cc(O)c(C4c5c(O)cc(O)cc5OC(c5ccc(O)cc5)C4O)c3[o+]c2-c2ccc(O)cc2)C(O)C(O)C1O	0	0	0	0	0	0	0	0	0	0	0	0	0	0	0	0	0	0	0	0	0	0	0	0	0	0	0	0	0	0	0	0	0	0	0	0	0	0	0	0	0	0	0	0	0	0	0
1739	Catechin-(4alpha->8)-pelargonidin 3'-glucoside	OCC1OC(Oc2cc3c(O)cc(O)c(C4c5c(O)cc(O)cc5OC(c5ccc(O)c(O)c5)C4O)c3[o+]c2-c2ccc(O)cc2)C(O)C(O)C1O	0	0	0	0	0	0	0	0	0	0	0	0	0	0	0	0	0	0	0	0	0	0	0	0	0	0	0	0	0	0	0	0	0	0	0	0	0	0	0	0	0	0	0	0	0	0	0
1740	Afzelechin-(4alpha->8)-pelargonidin 3-O-beta-glucopyranoside	OCC1OC(Oc2cc3c(O)cc(O)c(C4c5c(O)cc(O)cc5OC(c5ccc(O)cc5)C4O)c3[o+]c2-c2ccc(O)cc2)C(O)C(O)C1O	0	0	0	0	0	0	0	0	0	0	0	0	0	0	0	0	0	0	0	0	0	0	0	0	0	0	0	0	0	0	0	0	0	0	0	0	0	0	0	0	0	0	0	0	0	0	0
1741	3,3'-Dihydroxy-4,5-dimethoxybibenzyl	Cc1cccc(-c2nnc(-c3cccc4ccccc34)o2)c1	0	0	0	0	0	0	0	0	0	0	0	0	0	0	0	0	0	0	0	0	0	0	0	0	0	0	0	0	0	0	0	0	0	0	0	0	0	0	0	0	0	0	0	0	0	0	0
1743	3-Hydroxy-4-isopentenyl-5-methoxybibenzyl-2-carboxylic acid	COc1cc(CCc2ccccc2)c(C(=O)O)c(O)c1CC=C(C)C	0	0	0	0	0	0	0	0	0	0	0	0	0	0	0	0	0	0	0	0	0	0	0	0	0	0	0	0	0	0	0	0	0	0	0	0	0	0	0	0	0	0	0	0	0	0	0
1744	3-Hydroxy-5-methoxystilbene-2-carboxylic acid	COc1cc(O)c(C(=O)O)c(C=Cc2ccccc2)c1	0	0	0	0	0	0	0	0	0	0	0	0	0	0	0	0	0	0	0	0	0	0	0	0	0	0	0	0	0	0	0	0	0	0	0	0	0	0	0	0	0	0	0	0	0	0	0
1745	4-Methoxy-3,3',5-trihydroxybibenzyl	Nc1ccc(S(=O)(=O)Nc2nc3ccccc3nc2N2CCCCCC2)cc1	0	0	0	0	0	0	0	0	0	0	0	0	0	0	0	0	0	0	0	0	0	0	0	0	0	0	0	0	0	0	0	0	0	0	0	0	0	0	0	0	0	0	0	0	0	0	0
1746	5-Hydroxy-2,3,4-trimethoxy-9,10-dihydrophenanthrene	CC(C)CC(NC(=O)C(Cc1ccccc1)NC(=O)C(COCc1ccccc1)NC(=O)OC(C)(C)C)C(=O)OCc1ccccc1	0	0	0	0	0	0	0	0	0	0	0	0	0	0	0	0	0	0	0	0	0	0	0	0	0	0	0	0	0	0	0	0	0	0	0	0	0	0	0	0	0	0	0	0	0	0	0
1747	3-Isopentadienyl-3',4,5'-trihydroxystilbene	C=C(C)C=Cc1cc(C=Cc2cc(O)cc(O)c2)ccc1O	0	0	0	0	0	0	0	0	0	0	0	0	0	0	0	0	0	0	0	0	0	0	0	0	0	0	0	0	0	0	0	0	0	0	0	0	0	0	0	0	0	0	0	0	0	0	0
1748	2'',6''-O-Diacetyloninin	CC(O)C(O)C1=Nc2cncnc2NC1	0	0	0	0	0	0	0	0	0	0	0	0	0	0	0	0	0	0	0	0	0	0	0	0	0	0	0	0	0	0	0	0	0	0	0	0	0	0	0	0	0	0	0	0	0	0	0
1749	(3beta,4alpha,22beta)-22-[[2-O-(6-Deoxy-alpha-L-mannopyranosyl)-alpha-L-arabinopyranosyl]oxy]-23-hydroxyolean-12-en-3-yl O-6-deoxy-alpha-L-mannopyranosyl-(1->2)-O-beta-D-galactopyranosyl-(1->2)-beta-D-glucopyranosiduronic acid	CC1OC(OC2C(OC3CC(C)(C)CC4C5=CCC6C7(C)CCC(OC8OC(C(=O)O)C(O)C(O)C8OC8OC(CO)C(O)C(O)C8OC8OC(C)C(O)C(O)C8O)C(C)(CO)C7CCC6(C)C5(C)CCC34C)OCC(O)C2O)C(O)C(O)C1O	0	0	0	0	0	0	0	0	0	0	0	0	0	0	0	0	0	0	0	0	0	0	0	0	0	0	0	0	0	0	0	0	0	0	0	0	0	0	0	0	0	0	0	0	0	0	0
1750	(3beta,4alpha,22beta)-22-[[2-O-(6-Deoxy-alpha-L-mannopyranosyl)-beta-D-glucopyranosyl]oxy]-23-hydroxyolean-12-en-3-yl O-6-deoxy-alpha-L-mannopyranosyl-(1->2)-O-beta-D-galactopyranosyl-(1->2)-beta-D-glucopyranosiduronic acid	CC1OC(OC2C(OC3C(OC4CCC5(C)C(CCC6(C)C5CC=C5C7CC(C)(C)CC(OC8OC(CO)C(O)C(O)C8OC8OC(C)C(O)C(O)C8O)C7(C)CCC56C)C4(C)CO)OC(C(=O)O)C(O)C3O)OC(CO)C(O)C2O)C(O)C(O)C1O	0	0	0	0	0	0	0	0	0	0	0	0	0	0	0	0	0	0	0	0	0	0	0	0	0	0	0	0	0	0	0	0	0	0	0	0	0	0	0	0	0	0	0	0	0	0	0
1751	3-O-(beta-D-Glucopyranosyl)-soyasapogenol B	CC1(C)CC(O)C2(C)CCC3(C)C(=CCC4C5(C)CCC(OC6OC(CO)C(O)C(O)C6O)C(C)(CO)C5CCC43C)C2C1	0	0	0	0	0	0	0	0	0	0	0	0	0	0	0	0	0	0	0	0	0	0	0	0	0	0	0	0	0	0	0	0	0	0	0	0	0	0	0	0	0	0	0	0	0	0	0
1752	(+)-2,3-Dihydro-9-hydroxy-2[1-(6-sinapinoyl)beta-D-glucosyloxy-1-methylethyl]-7H-furo[3,2-g][1]benzopyran-7-one	COc1cc(C=CC(=O)OCC2OC(OC(C)(C)C3Cc4cc5ccc(=O)oc5c(O)c4O3)C(O)C(O)C2O)cc(OC)c1O	0	0	0	0	0	0	0	0	0	0	0	0	0	0	0	0	0	0	0	0	0	0	0	0	0	0	0	0	0	0	0	0	0	0	0	0	0	0	0	0	0	0	0	0	0	0	0
1753	7,4'-Dimethoxyflavone	COc1ccc(-c2cc(=O)c3ccc(OC)cc3o2)cc1	0	0	0	0	0	0	0	0	0	0	0	0	0	0	0	0	0	0	0	0	0	0	0	0	0	0	0	0	0	0	0	0	0	0	0	0	0	0	0	0	0	0	0	0	0	0	0
1754	Delphinidin 3-(3''-p-coumaroylglucoside)	O=C(C=Cc1ccc(O)cc1)OC1C(O)C(CO)OC(Oc2cc3c(O)cc(O)cc3[o+]c2-c2cc(O)c(O)c(O)c2)C1O	0	0	0	0	0	0	0	0	0	0	0	0	0	0	0	0	0	0	0	0	0	0	0	0	0	0	0	0	0	0	0	0	0	0	0	0	0	1	0	0	0	0	0	0	0	0	0
1755	Jacquinelin	CC1=C2C(=O)C=C(CO)C2C2OC(=O)C(C)C2CC1	0	0	0	0	0	0	0	0	0	0	0	0	0	0	0	0	0	0	0	0	0	0	0	0	0	0	0	0	0	0	0	0	0	0	0	0	0	0	0	0	0	0	0	0	0	0	0
1756	Crepidiaside B	CC1=C2C(=O)C=C(COC3OC(CO)C(O)C(O)C3O)C2C2OC(=O)C(C)C2CC1	0	0	0	0	0	0	0	0	0	0	0	0	0	0	0	0	0	0	0	0	0	0	0	0	0	0	0	0	0	0	0	0	0	0	0	0	0	0	0	0	0	0	0	0	0	0	0
1758	Apo-10'-zeaxanthinal	CC(C=CC=O)=CC=CC=C(C)C=CC=C(C)C=CC1=C(C)CC(O)CC1(C)C	0	0	0	0	0	0	0	0	0	0	0	0	0	0	0	0	0	0	0	0	0	0	0	0	0	0	0	0	0	0	0	0	0	0	0	0	0	0	0	0	0	0	0	0	0	0	0
1759	Apo-12'-zeaxanthinal	CC(C=O)=CC=CC=C(C)C=CC=C(C)C=CC1=C(C)CC(O)CC1(C)C	0	0	0	0	0	0	0	0	0	0	0	0	0	0	0	0	0	0	0	0	0	0	0	0	0	0	0	0	0	0	0	0	0	0	0	0	0	0	0	0	0	0	0	0	0	0	0
1760	Apo-14'-zeaxanthinal	CC(C=CC=C(C)C=CC1=C(C)CC(O)CC1(C)C)=CC=CC=O	0	0	0	0	0	0	0	0	0	0	0	0	0	0	0	0	0	0	0	0	0	0	0	0	0	0	0	0	0	0	0	0	0	0	0	0	0	0	0	0	0	0	0	0	0	0	0
1761	Apo-15-zeaxanthinal	CC(C=CC=C(C)C=CC1=C(C)CC(O)CC1(C)C)=CC=O	0	0	0	0	0	0	0	0	0	0	0	0	0	0	0	0	0	0	0	0	0	0	0	0	0	0	0	0	0	0	0	0	0	0	0	0	0	0	0	0	0	0	0	0	0	0	0
1762	Apo-13-zeaxanthinone	CC(=O)C=CC=C(C)C=CC1=C(C)CC(O)CC1(C)C	0	0	0	0	0	0	0	0	0	0	0	0	0	0	0	0	0	0	0	0	0	0	0	0	0	0	0	0	0	0	0	0	0	0	0	0	0	0	0	0	0	0	0	0	0	0	0
1763	Apo-11-zeaxanthinal	CC(C=CC1=C(C)CC(O)CC1(C)C)=CC=O	0	0	0	0	0	0	0	0	0	0	0	0	0	0	0	0	0	0	0	0	0	0	0	0	0	0	0	0	0	0	0	0	0	0	0	0	0	0	0	0	0	0	0	0	0	0	0
1764	Apo-9-zeaxanthinone	CC(=O)C=CC1=C(C)CC(O)CC1(C)C	0	0	0	0	0	0	0	0	0	0	0	0	0	0	0	0	0	0	0	0	0	0	0	0	0	0	0	0	0	0	0	0	0	0	0	0	0	0	0	0	0	0	0	0	0	0	0
1765	Apo-12'-capsorubinal	CC(C=O)=CC=CC=C(C)C=CC=C(C)C=CC(=O)C1(C)CC(O)CC1(C)C	0	0	0	0	0	0	0	0	0	0	0	0	0	0	0	0	0	0	0	0	0	0	0	0	0	0	0	0	0	0	0	0	0	0	0	0	0	0	0	0	0	0	0	0	0	0	0
1766	Apo-8'-capsorubinal	CC(C=O)=CC=CC(C)=CC=CC=C(C)C=CC=C(C)C=CC(=O)C1(C)CC(O)CC1(C)C	0	0	0	0	0	0	0	0	0	0	0	0	0	0	0	0	0	0	0	0	0	0	0	0	0	0	0	0	0	0	0	0	0	0	0	0	0	0	0	0	0	0	0	0	0	0	0
1767	9,9'-Diapo-10,9'-retro-carotene-9,9'-dione	CC(=O)C=CC=C(C)C=CC=CC(C)=CC=CC(C)=O	0	0	0	0	0	0	0	0	0	0	0	0	0	0	0	0	0	0	0	0	0	0	0	0	0	0	0	0	0	0	0	0	0	0	0	0	0	0	0	0	0	0	0	0	0	0	0
1768	Deepoxyneoxanthin	CC(C=C=C1C(C)(C)CC(O)CC1(C)O)=CC=CC(C)=CC=CC=C(C)C=CC=C(C)C=CC1=C(C)CC(O)CC1(C)C	0	0	0	0	0	0	0	0	0	0	0	0	0	0	0	0	0	0	0	0	0	0	0	0	0	0	0	0	0	0	0	0	0	0	0	0	0	0	0	0	0	0	0	0	0	0	0
1769	(3S,5R,8S)-5,8-Epoxy-5,8-dihydro-beta,beta-caroten-3-ol	CC(C=CC=C(C)C=CC1=C(C)CCCC1(C)C)=CC=CC=C(C)C=CC=C(C)C1C=C2C(C)(C)CC(O)CC2(C)O1	0	0	0	0	0	0	0	0	0	0	0	0	0	0	0	0	0	0	0	0	0	0	0	0	0	0	0	0	0	0	0	0	0	0	0	0	0	0	0	0	0	0	0	0	0	0	0
1770	(5R,5'R,6S,6'S)-5,6:5',6'-Diepoxy-5,5',6,6'-tetrahydro-beta,beta-carotene	CC(C=CC=C(C)C=CC12OC1(C)CCCC2(C)C)=CC=CC=C(C)C=CC=C(C)C=CC12OC1(C)CCCC2(C)C	0	0	0	0	0	0	0	0	0	0	0	0	0	0	0	0	0	0	0	0	0	0	0	0	0	0	0	0	0	0	0	0	0	0	0	0	1	0	0	0	0	0	0	0	0	0	0
1771	(3S,5R,6S)-5,6-Epoxy-5,6-dihydro-3-hydroxy-8'-apo-beta,psi-carotenal	CC(C=O)=CC=CC(C)=CC=CC=C(C)C=CC=C(C)C=CC12OC1(C)CC(O)CC2(C)C	0	0	0	0	0	0	0	0	0	0	0	0	0	0	0	0	0	0	0	0	0	0	0	0	0	0	0	0	0	0	0	0	0	0	0	0	1	0	0	0	0	0	0	0	0	0	0
1772	Mycorradicin	CC(C=CC(=O)O)=CC=CC=C(C)C=CC(=O)O	0	0	0	0	0	0	0	0	0	0	0	0	0	0	0	0	0	0	0	0	0	0	0	0	0	0	0	0	0	0	0	0	0	0	0	0	0	0	0	0	0	0	0	0	0	0	0
1773	(9Z)-beta,beta-Carotene	CC(C=CC=C(C)C=CC1=C(C)CCCC1(C)C)=CC=CC=C(C)C=CC=C(C)C=CC1=C(C)CCCC1(C)C	0	0	0	0	0	0	0	0	0	0	0	0	0	0	0	0	0	0	0	0	0	0	0	0	0	0	0	0	0	0	0	0	0	0	0	0	0	0	0	0	0	0	0	0	0	0	0
1774	(13Z)-Lycopene	CC(C)=CCCC(C)=CC=CC(C)=CC=CC(C)=CC=CC=C(C)C=CC=C(C)C=CC=C(C)CCC=C(C)C	0	0	0	0	0	0	0	0	0	0	0	0	0	0	0	0	0	0	0	0	0	0	0	0	0	0	0	0	0	0	0	0	0	0	0	0	0	0	0	0	0	0	0	0	0	0	0
1775	(15Z)-Lycopene	CC(C)=CCCC(C)=CC=CC(C)=CC=CC(C)=CC=CC=C(C)C=CC=C(C)C=CC=C(C)CCC=C(C)C	0	0	0	0	0	0	0	0	0	0	0	0	0	0	0	0	0	0	0	0	0	0	0	0	0	0	0	0	0	0	0	0	0	0	0	0	0	0	0	0	0	0	0	0	0	0	0
1776	(8'R)-Neochrome	CC(C=C=C1C(C)(C)CC(O)CC1(C)O)=CC=CC(C)=CC=CC=C(C)C=CC=C(C)C1C=C2C(C)(C)CC(C)CC2(C)O1	0	0	0	0	0	0	0	0	0	0	0	0	0	0	0	0	0	0	0	0	0	0	0	0	0	0	0	0	0	0	0	0	0	0	0	0	0	0	0	0	0	0	0	0	0	0	0
1777	Oxoxylopine	COc1ccc2c(c1)C(=O)c1nccc3cc4c(c-2c13)OCO4	0	0	0	0	0	0	0	0	0	0	0	0	0	0	0	0	0	0	0	0	0	0	0	0	0	0	0	0	0	0	0	0	0	0	0	0	0	0	0	0	0	0	0	0	0	0	0
1778	7-Acetylintermedine	CC(=O)OC1CCN2CC=C(COC(=O)C(O)(C(C)C)C(C)O)C12	0	0	0	0	0	0	0	0	0	0	0	0	0	0	0	0	0	0	0	0	0	0	0	0	0	0	0	0	0	0	0	0	0	0	0	0	0	0	0	0	0	0	0	0	0	0	0
1779	Rutalexin	Cn1c(=O)sc2[nH]c3ccccc3c2c1=O	0	0	0	0	0	0	0	0	0	0	0	0	0	0	0	0	0	0	0	0	0	0	0	0	0	0	0	0	0	0	0	0	0	0	0	0	0	0	0	0	0	0	0	0	0	0	0
1780	1-(R)-Phenylethyl beta-D-glucopyranoside	CC(C)=CCCC1=CCC(C=O)CC1	0	0	0	0	0	0	0	0	0	0	0	0	0	0	0	0	0	0	0	0	0	0	0	0	0	0	0	0	0	0	0	0	0	0	0	0	0	0	0	0	0	0	0	0	0	0	0
1782	3beta-Chlorodehydrocostuslactone	C=C1C(=O)OC2C1CCC(=C)C1CC(Cl)C(=C)C12	1	0	0	0	0	0	0	0	0	0	0	0	0	0	0	0	0	0	0	0	0	0	0	0	0	0	0	0	0	0	0	0	0	0	0	0	0	0	0	0	0	0	0	0	0	0	0
1783	3-Methoxy-4-hydroxyphenylacetic acid	COc1cc(CC(=O)O)ccc1O	0	0	0	0	0	0	0	0	0	0	0	0	0	0	0	0	0	0	0	0	0	0	0	0	0	0	0	0	0	0	0	0	0	0	0	0	0	0	0	0	0	0	0	0	0	0	0
1784	5beta,19-Epoxy-19-methoxycucurbita-6,23(E)-diene-3beta,25-diol	COC1OC23C=CC4C1(CCC1(C)C(C(C)CC=CC(C)(C)O)CCC41C)C2CCC(O)C3(C)C	0	0	0	0	0	0	0	0	0	0	0	0	0	0	0	0	0	0	0	0	0	0	0	0	0	0	0	0	0	0	0	0	0	0	0	0	0	0	0	0	0	0	0	0	0	0	0
1785	Basilimoside	CCC(C=CC(C)C1CCC2C3CC=C4CC(OC5OC(CO)C(O)C(O)C5O)CCC4(C)C3CCC12C)C(C)(C)C	0	0	0	0	0	0	0	0	0	0	0	0	0	0	0	0	0	0	0	0	0	0	0	0	0	0	0	0	0	0	0	0	0	0	0	0	0	0	0	0	0	0	0	0	0	0	0
1786	Basilol	CC1(C)CCC2(C(=O)Oc3ccc(C=O)cc3)CCC3(C)C(=CCC4C5(C)CCC(O)C(C)(C)C5CCC43C)C2C1	0	0	0	0	0	0	0	0	0	0	0	0	0	0	0	0	0	0	0	0	0	0	0	0	0	0	0	0	0	0	0	0	0	0	0	0	0	0	0	0	0	0	0	0	0	0	0
1787	Carthamoside A1	CC=CC#CC#CCCCOC1OC2COC(C)(C)OC2C(O)C1O	0	0	0	0	0	0	0	0	0	0	0	0	0	0	0	0	0	0	0	0	0	0	0	0	0	0	0	0	0	0	0	0	0	0	0	0	0	0	0	0	0	0	0	0	0	0	0
1788	Chakaflavonoside A	CC1OC(OCC2OC(OC3C(=O)c4c(O)cc(O)cc4OC3c3ccc(O)cc3)C(OC(=O)C=Cc3ccc(O)cc3)C(OC3OC(CO)C(O)C(O)C3O)C2O)C(O)C(OC2OC(CO)C(O)C(O)C2O)C1O	0	0	0	0	0	0	0	0	0	0	0	0	0	0	0	0	0	0	0	0	0	0	0	0	0	0	0	0	0	0	0	0	0	0	0	0	0	0	0	0	0	0	0	0	0	0	0
1789	Chakanoside I	O=C(COC1OC(CO)C(O)C(O)C1O)c1ccccc1	0	0	0	0	0	0	0	0	0	0	0	0	0	0	0	0	0	0	0	0	0	0	0	0	0	0	0	0	0	0	0	0	0	0	0	0	0	0	0	0	0	0	0	0	0	0	0
1790	Chakasaponin I	CC=C(C)C(=O)OC1C(OC(C)=O)C2(CO)C(O)CC3(C)C(=CCC4C5(C)CCC(OC6OC(C(=O)O)C(O)C(OC7OCC(O)C(O)C7OC7OCC(O)C(O)C7O)C6OC6OC(CO)C(O)C(O)C6O)C(C)(C)C5CCC43C)C2CC1(C)C	0	0	0	0	0	0	0	0	0	0	0	0	0	0	0	0	0	0	0	0	0	0	0	0	0	0	0	0	0	0	0	0	0	0	0	0	0	0	0	0	0	0	0	0	0	0	0
1791	Chakasaponin II	CC=C(C)C(=O)OC1C(OC(=O)C(C)=CC)C2(CO)C(CC1(C)C)C1=CCC3C4(C)CCC(OC5OC(C(=O)O)C(O)C(OC6OCC(O)C(O)C6OC6OCC(O)C(O)C6O)C5OC5OC(CO)C(O)C(O)C5O)C(C)(C)C4CCC3(C)C1(C)C(O)C2O	0	0	0	0	0	0	0	0	0	0	0	0	0	0	0	0	0	0	0	0	0	0	0	0	0	0	0	0	0	0	0	0	0	0	0	0	0	0	0	0	0	0	0	0	0	0	0
1792	Chakasaponin III	CC=C(C)C(=O)OC1C(OC(C)=O)C2(CO)C(CC1(C)C)C1=CCC3C4(C)CCC(OC5OC(C(=O)O)C(O)C(OC6OCC(O)C(O)C6OC6OCC(O)C(O)C6O)C5OC5OC(CO)C(O)C(O)C5O)C(C)(C)C4CCC3(C)C1(C)C(O)C2O	0	0	0	0	0	0	0	0	0	0	0	0	0	0	0	0	0	0	0	0	0	0	0	0	0	0	0	0	0	0	0	0	0	0	0	0	0	0	0	0	0	0	0	0	0	0	0
1793	Chakasaponin V	CC=C(C)C(=O)OC1C(OC(=O)C(C)=CC)C2(CO)C(CC1(C)C)C1=CCC3C4(C)CCC(OC5OC(C(=O)O)C(O)C(OC6OCC(O)C(O)C6OC6OC(C)C(O)C(O)C6O)C5OC5OC(CO)C(O)C(O)C5O)C(C)(C)C4CCC3(C)C1(C)C(O)C2O	0	0	0	0	0	0	0	0	0	0	0	0	0	0	0	0	0	0	0	0	0	0	0	0	0	0	0	0	0	0	0	0	0	0	0	0	0	0	0	0	0	0	0	0	0	0	0
1794	Chakasaponin VI	CC(C)=CCc1cc(C=CC(=O)c2ccc(O)cc2O)cc(CC=C(C)C)c1O	0	0	0	0	0	0	0	0	0	0	0	0	0	0	0	0	0	0	0	0	0	0	0	0	0	0	0	0	0	0	0	0	0	0	0	0	0	0	0	0	0	0	0	0	0	0	0
1795	Cichorioside B	CC1=C2C(=O)C=C(COC3OC(CO)C(O)C(O)C3O)C2C2OC(=O)C(C)C2C(O)C1	0	0	0	0	0	0	0	0	0	0	0	0	0	0	0	0	0	0	0	0	0	0	0	0	0	0	0	0	0	0	0	0	0	0	0	0	0	0	0	0	0	0	0	0	0	0	0
1796	Cichorioside C	CC1=CCC(OC2OC(CO)C(O)C(O)C2O)C(C)=CC2OC(=O)C(C)C2C(O)C1	0	0	0	0	0	0	0	0	0	0	0	0	0	0	0	0	0	0	0	0	0	0	0	0	0	0	0	0	0	0	0	0	0	0	0	0	0	0	0	0	0	0	0	0	0	0	0
1797	Cichorioside D	CC1=C2C(=O)C=C(COC3OC(COC4OC(C)C(O)C(O)C4O)C(O)C(O)C3O)C2C2OC(=O)C(C)C2CC1	0	0	0	0	0	0	0	0	0	0	0	0	0	0	0	0	0	0	0	0	0	0	0	0	0	0	0	0	0	0	0	0	0	0	0	0	0	0	0	0	0	0	0	0	0	0	0
1798	Cichorioside F	CC1=C2C(=O)C=C(COC3(CO)OC(CO)C(O)C3O)C2C2OC(=O)C(C)C2C(O)C1	0	0	0	0	0	0	0	0	0	0	0	0	0	0	0	0	0	0	0	0	0	0	0	0	0	0	0	0	0	0	0	0	0	0	0	0	0	0	0	0	0	0	0	0	0	0	0
1799	Cichorioside G	CC1=C2C(=O)C=C(CO)C2C2OC(=O)C(C)C2C(OC2OC(CO)C(O)C(O)C2O)C1	0	0	0	0	0	0	0	0	0	0	0	0	0	0	0	0	0	0	0	0	0	0	0	0	0	0	0	0	0	0	0	0	0	0	0	0	0	0	0	0	0	0	0	0	0	0	0
1800	Cichorioside H	CC1=C2C(=O)C=C(CO)C2C2OC(=O)C(C)C2CC1OC1OC(CO)C(O)C(O)C1O	0	0	0	0	0	0	0	0	0	0	0	0	0	0	0	0	0	0	0	0	0	0	0	0	0	0	0	0	0	0	0	0	0	0	0	0	0	0	0	0	0	0	0	0	0	0	0
1801	Cichorioside I	CC1=C2C(=O)C=C(COC3OC(CO)C(O)C(O)C3O)C2C(O)C2C(C1)OC(=O)C2C	0	0	0	0	0	0	0	0	0	0	0	0	0	0	0	0	0	0	0	0	0	0	0	0	0	0	0	0	0	0	0	0	0	0	0	0	0	0	0	0	0	0	0	0	0	0	0
1802	Cichorioside J	C=C1CCC2C1C13OCC2(O)C=CC1=C(CCOC1OC(CO)C(O)C(O)C1O)C(=O)O3	0	0	0	0	0	0	0	0	0	0	0	0	0	0	0	0	0	0	0	0	0	0	0	0	0	0	0	0	0	0	0	0	0	0	0	0	0	0	0	0	0	0	0	0	0	0	0
1803	Cichorioside K	C=C1CCC2C1C13OC(=O)C(COC4OC(CO)C(O)C(O)C4O)=C1C=CC2(CO)O3	0	0	0	0	0	0	0	0	0	0	0	0	0	0	0	0	0	0	0	0	0	0	0	0	0	0	0	0	0	0	0	0	0	0	0	0	0	0	0	0	0	0	0	0	0	0	0
1804	Cichorioside L	CC1=CCC(O)C(C)=CC2OC(=O)C(C)C2C(OC2OC(COC3OCC(O)(CO)C3O)C(O)C(O)C2O)C1	0	0	0	0	0	0	0	0	0	0	0	0	0	0	0	0	0	0	0	0	0	0	0	0	0	0	0	0	0	0	0	0	0	0	0	0	0	0	0	0	0	0	0	0	0	0	0
1805	Cichorioside M	CC1=CCC(OC2OC(CO)C(O)C(O)C2O)C(C)=CC(O)C2C(C1)OC(=O)C2C	0	0	0	0	0	0	0	0	0	0	0	0	0	0	0	0	0	0	0	0	0	0	0	0	0	0	0	0	0	0	0	0	0	0	0	0	0	0	0	0	0	0	0	0	0	0	0
1806	Cichorioside N	C=CC1(C)CC(O)C2C(C)C(=O)CC2C1C(C)=COC1OC(CO)C(O)C(O)C1O	0	0	0	0	0	0	0	0	0	0	0	0	0	0	0	0	0	0	0	0	0	0	0	0	0	0	0	0	0	0	0	0	0	0	0	0	0	0	0	0	0	0	0	0	0	0	0
1807	Diarctigenin	COc1ccc(CC2COC(=O)C2Cc2cc(OC)c(O)c(-c3cc(CC4C(=O)OCC4Cc4ccc(OC)c(OC)c4)cc(OC)c3O)c2)cc1OC	0	0	0	0	0	0	0	0	0	0	0	0	0	0	0	0	0	0	0	0	0	0	0	0	0	0	0	0	0	0	0	0	0	0	0	0	0	0	0	0	0	0	0	0	0	0	0
1808	Floratheasaponin B	CC=C(C)C(=O)OC1C(OC(=O)C(C)=CC)C2(CO)C(CC1(C)C)C1=CCC3C4(C)CCC(OC5OC(C(=O)O)C(O)C(OC6OCC(O)C(O)C6OC6OCC(O)C(O)C6O)C5OC5OC(CO)C(O)C(O)C5O)C(C)(C)C4CCC3(C)C1(C)C(O)C2O	0	0	0	0	0	0	0	0	0	0	0	0	0	0	0	0	0	0	0	0	0	0	0	0	0	0	0	0	0	0	0	0	0	0	0	0	0	0	0	0	0	0	0	0	0	0	0
1809	Floratheasaponin C	CC=C(C)C(=O)OC1C(OC(=O)C(C)CC)C2(CO)C(CC1(C)C)C1=CCC3C4(C)CCC(OC5OC(C(=O)O)C(O)C(OC6OCC(O)C(O)C6OC6OCC(O)C(O)C6O)C5OC5OC(CO)C(O)C(O)C5O)C(C)(C)C4CCC3(C)C1(C)C(O)C2O	0	0	0	0	0	0	0	0	0	0	0	0	0	0	0	0	0	0	0	0	0	0	0	0	0	0	0	0	0	0	0	0	0	0	0	0	0	0	0	0	0	0	0	0	0	0	0
1810	Floratheasaponin D	CC=C(C)C(=O)OC1C(OC(C)=O)C2(CO)C(O)CC3(C)C(=CCC4C5(C)CCC(OC6OC(C(=O)O)C(O)C(OC7OCC(O)C(O)C7OC7OC(C)C(O)C(O)C7O)C6OC6OC(CO)C(O)C(O)C6O)C(C)(C)C5CCC43C)C2CC1(C)C	0	0	0	0	0	0	0	0	0	0	0	0	0	0	0	0	0	0	0	0	0	0	0	0	0	0	0	0	0	0	0	0	0	0	0	0	0	0	0	0	0	0	0	0	0	0	0
1811	Floratheasaponin E	CC=C(C)C(=O)OC1C(OC(=O)C(C)=CC)C2(CO)C(CC1(C)C)C1=CCC3C4(C)CCC(OC5OC(C(=O)O)C(O)C(OC6OCC(O)C(O)C6OC6OC(C)C(O)C(O)C6O)C5OC5OC(CO)C(O)C(O)C5O)C(C)(C)C4CCC3(C)C1(C)C(O)C2O	0	0	0	0	0	0	0	0	0	0	0	0	0	0	0	0	0	0	0	0	0	0	0	0	0	0	0	0	0	0	0	0	0	0	0	0	0	0	0	0	0	0	0	0	0	0	0
1812	Floratheasaponin F	CC=C(C)C(=O)OC1C(OC(=O)C(C)CC)C2(CO)C(CC1(C)C)C1=CCC3C4(C)CCC(OC5OC(C(=O)O)C(O)C(OC6OCC(O)C(O)C6OC6OC(C)C(O)C(O)C6O)C5OC5OC(CO)C(O)C(O)C5O)C(C)(C)C4CCC3(C)C1(C)C(O)C2O	0	0	0	0	0	0	0	0	0	0	0	0	0	0	0	0	0	0	0	0	0	0	0	0	0	0	0	0	0	0	0	0	0	0	0	0	0	0	0	0	0	0	0	0	0	0	0
1813	Floratheasaponin G	CC=C(C)C(=O)OC1C(OC(C)=O)C2(CO)C(O)CC3(C)C(=CCC4C5(C)CCC(OC6OC(C(=O)O)C(O)C(OC7OCC(O)C(O)C7OC7OC(C)C(O)C(O)C7O)C6OC6OC(CO)C(O)C(O)C6O)C(C)(C)C5CCC43C)C2CC1(C)C	0	0	0	0	0	0	0	0	0	0	0	0	0	0	0	0	0	0	0	0	0	0	0	0	0	0	0	0	0	0	0	0	0	0	0	0	0	0	0	0	0	0	0	0	0	0	0
1814	Floratheasaponin H	CC=C(C)C(=O)OC1C(OC(C)=O)C2(CO)C(OC(C)=O)CC3(C)C(=CCC4C5(C)CCC(OC6OC(C(=O)O)C(O)C(OC7OCC(O)C(O)C7OC7OC(C)C(O)C(O)C7O)C6OC6OC(CO)C(O)C(O)C6O)C(C)(C)C5CCC43C)C2CC1(C)C	0	0	0	0	0	0	0	0	0	0	0	0	0	0	0	0	0	0	0	0	0	0	0	0	0	0	0	0	0	0	0	0	0	0	0	0	0	0	0	0	0	0	0	0	0	0	0
1815	Floratheasaponin I	CC=C(C)C(=O)OC1C(O)C2(COC(C)=O)C(O)CC3(C)C(=CCC4C5(C)CCC(OC6OC(C(=O)O)C(O)C(OC7OCC(O)C(O)C7OC7OC(C)C(O)C(O)C7O)C6OC6OC(CO)C(O)C(O)C6O)C(C)(C)C5CCC43C)C2CC1(C)C	0	0	0	0	0	0	0	0	0	0	0	0	0	0	0	0	0	0	0	0	0	0	0	0	0	0	0	0	0	0	0	0	0	0	0	0	0	0	0	0	0	0	0	0	0	0	0
1817	Heptacosane	CCCCCCCCCCCCCCCCCCCCCCCCCCC	0	0	0	0	0	0	0	0	0	0	0	0	0	0	0	0	0	0	0	0	0	0	0	0	0	0	0	0	0	0	0	1	0	0	0	0	0	0	0	0	0	0	0	0	0	0	0
1818	Hexacosane	CCCCCCCCCCCCCCCCCCCCCCCCCC	0	0	0	0	0	0	0	0	0	0	0	0	0	0	0	0	0	0	0	0	0	0	0	0	0	0	0	0	0	0	0	1	0	0	0	0	0	0	0	0	0	0	0	0	0	0	0
1819	Hippuric acid	O=C(O)CNC(=O)c1ccccc1	0	0	0	0	0	0	0	0	0	0	0	0	0	0	0	0	0	0	0	0	0	0	0	0	0	0	0	0	0	0	0	0	0	0	0	0	0	0	0	0	0	0	0	0	0	0	0
1820	Isolappaol C	COc1cc(CC2OCC(=O)C2Cc2cc(OC)c(O)c(C(CO)C(O)c3ccc(O)c(OC)c3)c2)ccc1O	0	0	0	0	0	0	0	0	0	0	0	0	0	0	0	0	0	0	0	0	0	0	0	0	0	0	0	0	0	0	0	0	0	0	0	0	0	0	0	0	0	0	0	0	0	0	0
1821	Lappaol D	COc1cc(CC2C(=O)OCC2Cc2cc(OC)c3c(c2)C(CO)C(c2ccc(O)c(OC)c2)O3)ccc1O	0	0	0	0	0	0	0	0	0	0	0	0	0	0	0	0	0	0	0	0	0	0	0	0	0	0	0	0	0	0	0	0	0	0	0	0	0	0	0	0	0	0	0	0	0	0	0
1822	Lappaol F	COc1cc(C2Oc3c(OC)cc(CC4COC(=O)C4Cc4cc(OC)c5c(c4)C(CO)C(c4ccc(O)c(OC)c4)O5)cc3C2CO)ccc1O	0	0	0	0	0	0	0	0	0	0	0	0	0	0	0	0	0	0	0	0	0	0	0	0	0	0	0	0	0	0	0	0	0	0	0	0	0	0	0	0	0	0	0	0	0	0	0
1823	Methyl ferulate	COC(=O)C=Cc1ccc(O)c(OC)c1	0	0	0	0	0	0	0	0	0	0	0	0	0	0	0	0	0	0	0	0	0	0	0	0	0	0	0	0	0	0	0	0	0	0	0	0	0	0	0	0	0	0	0	0	0	0	0
1824	Operculin VII	CCCCCCCCCCCC(=O)OC1C(OC2C(C)OC3OC4C(OC(CCCCC)CCCCCCCCCC(=O)OC3C2O)OC(C)C(O)C4O)OC(C)C(OC2OC(C)C(OC(=O)CCCCCCCCC)C(O)C2O)C1OC1OC(CO)C(O)C(O)C1O	0	0	0	0	0	0	0	0	0	0	0	0	0	0	0	0	0	0	0	0	0	0	0	0	0	0	0	0	0	0	0	1	0	0	0	0	0	0	0	0	0	0	0	0	0	0	0
1825	Methyl p-coumarate	COC(=O)C=Cc1ccc(O)cc1	0	0	0	0	0	0	0	0	0	0	0	0	0	0	0	0	0	0	0	0	0	0	0	0	0	0	0	0	0	0	0	0	0	0	0	0	0	0	0	0	0	0	0	0	0	0	0
1826	Sonchuside A	CC1=CCC(OC2OC(CO)C(O)C(O)C2O)C(C)=CC2OC(=O)C(C)C2CC1	0	0	0	0	0	0	0	0	0	0	0	0	0	0	0	0	0	0	0	0	0	0	0	0	0	0	0	0	0	0	0	0	0	0	0	0	0	0	0	0	0	0	0	0	0	0	0
1827	Theasaponin A1	CC=C(C)C(=O)OC1C(O)C2(CO)C(O)CC3(C)C(=CCC4C5(C)CCC(OC6OC(C(=O)O)C(O)C(OC7OCC(O)C(O)C7OC7OCC(O)C(O)C7O)C6OC6OC(CO)C(O)C(O)C6O)C(C)(CO)C5CCC43C)C2CC1(C)C	0	0	0	0	0	0	0	0	0	0	0	0	0	0	0	0	0	0	0	0	0	0	0	0	0	0	0	0	0	0	0	0	0	0	0	0	0	0	0	0	0	0	0	0	0	0	0
1828	Theasaponin A2	CC=C(C)C(=O)OC1C(O)C2(COC(C)=O)C(O)CC3(C)C(=CCC4C5(C)CCC(OC6OC(C(=O)O)C(O)C(OC7OCC(O)C(O)C7OC7OCC(O)C(O)C7O)C6OC6OC(CO)C(O)C(O)C6O)C(C)(CO)C5CCC43C)C2CC1(C)C	0	0	0	0	0	0	0	0	0	0	0	0	0	0	0	0	0	0	0	0	0	0	0	0	0	0	0	0	0	0	0	0	0	0	0	0	0	0	0	0	0	0	0	0	0	0	0
1829	Theasaponin A3	CC=C(C)C(=O)OC1C(OC(C)=O)C2(CO)C(OC(C)=O)CC3(C)C(=CCC4C5(C)CCC(OC6OC(C(=O)O)C(O)C(OC7OCC(O)C(O)C7OC7OCC(O)C(O)C7O)C6OC6OC(CO)C(O)C(O)C6O)C(C)(CO)C5CCC43C)C2CC1(C)C	0	0	0	0	0	0	0	0	0	0	0	0	0	0	0	0	0	0	0	0	0	0	0	0	0	0	0	0	0	0	0	0	0	0	0	0	0	0	0	0	0	0	0	0	0	0	0
1830	Theasaponin A4	CCCCCC=CCC=CC=CC=CCC1OC1CCC(=O)O	0	0	0	0	0	0	0	0	0	0	0	0	0	0	0	0	0	0	0	0	0	0	0	0	0	0	0	0	0	0	0	0	0	0	0	0	1	0	0	0	0	0	0	0	0	0	0
1831	Theasaponin A5	C=C1CC23CC1(O)CCC2C12CC=CC(C)(C(=O)O1)C2C3C(=O)O	0	0	0	0	0	0	0	0	0	0	0	0	0	0	0	0	0	0	0	0	0	0	0	0	0	0	0	0	0	0	0	0	0	0	0	0	0	0	0	0	0	0	0	0	0	0	0
1832	Theasaponin C1	CC=C(C)C(=O)OC1CC(C)(C)CC2C3=CCC4C5(C)CCC(OC6OC(C(=O)O)C(O)C(OC7OCC(O)C(O)C7OC7OCC(O)C(O)C7O)C6OC6OC(CO)C(O)C(O)C6O)C(C)(CO)C5CCC4(C)C3(C)CC(O)C12CO	0	0	0	0	0	0	0	0	0	0	0	0	0	0	0	0	0	0	0	0	0	0	0	0	0	0	0	0	0	0	0	0	0	0	0	0	0	0	0	0	0	0	0	0	0	0	0
1833	Theasaponin E3	O=C1c2ccccc2NC(c2ccccc2[N+](=O)[O-])N1O	0	0	0	0	0	0	0	0	0	0	0	0	0	0	0	0	0	0	0	0	0	0	0	0	0	0	0	0	0	0	0	0	0	0	0	0	0	0	0	0	0	0	0	0	0	0	0
1834	Theasaponin E4	CC=C(C)C(=O)OC1C(O)C2(CO)C(OC(C)=O)CC3(C)C(=CCC4C5(C)CCC(OC6OC(C(=O)O)C(O)C(OC7OCC(O)C(O)C7OC7OCC(O)C(O)C7O)C6OC6OC(CO)C(O)C(O)C6O)C(C)(C=O)C5CCC43C)C2CC1(C)C	0	0	0	0	0	0	0	0	0	0	0	0	0	0	0	0	0	0	0	0	0	0	0	0	0	0	0	0	0	0	0	0	0	0	0	0	0	0	0	0	0	0	0	0	0	0	0
1835	Theasaponin E5	COc1ccc(OCC(=O)Nc2ccc(S(=O)(=O)N3CCC(C)CC3)cc2)cc1	0	0	0	0	0	0	0	0	0	0	0	0	0	0	0	0	0	0	0	0	0	0	0	0	0	0	0	0	0	0	0	0	0	0	0	0	0	0	0	0	0	0	0	0	0	0	0
1836	Theasaponin E6	CC=C(C)C(=O)OC1C(O)C2(CO)C(O)CC3(C)C(=CCC4C5(C)CCC(OC6OC(C(=O)O)C(O)C(OC7OCC(O)C(O)C7OC7OCC(O)C(O)C7O)C6OC6OC(CO)C(O)C(O)C6O)C(C)(C=O)C5CCC43C)C2CC1(C)C	0	0	0	0	0	0	0	0	0	0	0	0	0	0	0	0	0	0	0	0	0	0	0	0	0	0	0	0	0	0	0	0	0	0	0	0	0	0	0	0	0	0	0	0	0	0	0
1837	Theasaponin E7	CC=C(C)C(=O)OC1C(OC(C)=O)C2(CO)C(O)CC3(C)C(=CCC4C5(C)CCC(OC6OC(C(=O)O)C(O)C(OC7OCC(O)C(O)C7OC7OCC(O)C(O)C7O)C6OC6OC(CO)C(O)C(O)C6O)C(C)(C=O)C5CCC43C)C2CC1(C)C	0	0	0	0	0	0	0	0	0	0	0	0	0	0	0	0	0	0	0	0	0	0	0	0	0	0	0	0	0	0	0	0	0	0	0	0	0	0	0	0	0	0	0	0	0	0	0
1838	Theasaponin E8	CC=C(C)C(=O)OC1C(O)C2(CO)C(OC(C)=O)CC3(C)C(=CCC4C5(C)CCC(OC6OC(C(=O)O)C(O)C(OC7OCC(O)C(O)C7OC7OCC(O)C(O)C7O)C6OC6OC(CO)C(O)C(O)C6O)C(C)(C=O)C5CCC43C)C2CC1(C)C	0	0	0	0	0	0	0	0	0	0	0	0	0	0	0	0	0	0	0	0	0	0	0	0	0	0	0	0	0	0	0	0	0	0	0	0	0	0	0	0	0	0	0	0	0	0	0
1839	Theasaponin E9	CC=C(C)C(=O)OC1C(O)C2(COC(C)=O)C(OC(C)=O)CC3(C)C(=CCC4C5(C)CCC(OC6OC(C(=O)O)C(O)C(OC7OCC(O)C(O)C7OC7OCC(O)C(O)C7O)C6OC6OC(CO)C(O)C(O)C6O)C(C)(C=O)C5CCC43C)C2CC1(C)C	0	0	0	0	0	0	0	0	0	0	0	0	0	0	0	0	0	0	0	0	0	0	0	0	0	0	0	0	0	0	0	0	0	0	0	0	0	0	0	0	0	0	0	0	0	0	0
1840	Theasaponin F1	Cc1c(C(=O)O)c(O)cc2cc3c(c(O)c12)C(=O)c1c(O)cc(O)cc1C3	0	0	0	0	0	0	0	0	0	0	0	0	0	0	0	0	0	0	0	0	0	0	0	0	0	0	0	0	0	0	0	0	0	0	0	0	0	0	0	0	0	0	0	0	0	0	0
1841	Theasaponin F2	CC(=O)c1c(C=C(O)CC(=O)O)cc2c(c1O)C(=O)c1c(O)cc(O)cc1C2	0	0	0	0	0	0	0	0	0	0	0	0	0	0	0	0	0	0	0	0	0	0	0	0	0	0	0	0	0	0	0	0	0	0	0	0	0	0	0	0	0	0	0	0	0	0	0
1842	Theasaponin F3	CC=C(C)C(=O)OC1C(O)C2(CO)C(OC(C)=O)CC3(C)C(=CCC4C5(C)CCC(OC6OC(C(=O)O)C(O)C(OC7OCC(O)C(O)C7OC7OCC(O)C(O)C7O)C6OC6OC(CO)C(O)C(O)C6O)C(C)(C(=O)OC)C5CCC43C)C2CC1(C)C	0	0	0	0	0	0	0	0	0	0	0	0	0	0	0	0	0	0	0	0	0	0	0	0	0	0	0	0	0	0	0	0	0	0	0	0	0	0	0	0	0	0	0	0	0	0	0
1843	Theasaponin G1	CC=C(C)C(=O)OCC12C(O)CC(C)(C)CC1C1=CCC3C4(C)CCC(OC5OC(C(=O)O)C(O)C(OC6OCC(O)C(O)C6OC6OCC(O)C(O)C6O)C5OC5OC(CO)C(O)C(O)C5O)C(C)(C=O)C4CCC3(C)C1(C)CC2O	0	0	0	0	0	0	0	0	0	0	0	0	0	0	0	0	0	0	0	0	0	0	0	0	0	0	0	0	0	0	0	0	0	0	0	0	0	0	0	0	0	0	0	0	0	0	0
1844	Theasaponin H1	CC=C(C)C(=O)OC1CC(C)(C)CC2C3=CCC4C5(C)CCC(OC6OC(C(=O)O)C(O)C(OC7OCC(O)C(O)C7OC7OCC(O)C(O)C7O)C6OC6OC(CO)C(O)C(O)C6O)C(C)(C(=O)OC)C5CCC4(C)C3(C)CC(O)C12CO	0	0	0	0	0	0	0	0	0	0	0	0	0	0	0	0	0	0	0	0	0	0	0	0	0	0	0	0	0	0	0	0	0	0	0	0	0	0	0	0	0	0	0	0	0	0	0
1845	trans-p-Coumaroyl beta-D-glucopyranoside	O=C(C=Cc1ccc(O)cc1)OC1OC(CO)C(O)C(O)C1O	0	0	0	0	0	0	0	0	0	0	0	0	0	0	0	0	0	0	0	0	0	0	0	0	0	0	0	0	0	0	0	0	0	0	0	0	0	0	0	0	0	0	0	0	0	0	0
1846	(2R)-Naringenin 8-C-alpha-L-rhamnopyranosyl-(1->2)-beta-D-glucopyranoside	O=C1CC(c2ccc(O)cc2)Oc2c1c(O)cc(O)c2C1OC(CO)C(O)C(O)C1OC1OC(O)C(O)C(O)C1O	0	0	0	0	0	0	0	0	0	0	0	0	0	0	0	0	0	0	0	0	0	0	0	0	0	0	0	0	0	0	0	0	0	0	0	0	0	0	0	0	0	0	0	0	0	0	0
1847	(2S)-Naringenin 8-C-alpha-L-rhamnopyranosyl-(1->2)-beta-D-glucopyranoside	CC1OC(OC2C(c3c(O)cc(O)c4c3OC(c3ccc(O)cc3)CC4=O)OC(CO)C(O)C2O)C(O)C(O)C1O	0	0	0	0	0	0	0	0	0	0	0	0	0	0	0	0	0	0	0	0	0	0	0	0	0	0	0	0	0	0	0	0	0	0	0	0	0	0	0	0	0	0	0	0	0	0	0
1848	1-O-Feruloyl-beta-D-glucopyranose	COc1ccc(C=CC(=O)OC2OC(CO)C(O)C(O)C2O)cc1O	0	0	0	0	0	0	0	0	0	0	0	0	0	0	0	0	0	0	0	0	0	0	0	0	0	0	0	0	0	0	0	0	0	0	0	0	0	0	0	0	0	0	0	0	0	0	0
1849	4-O-p-Coumaroylquinic acid	O=C(C=Cc1ccc(O)cc1)OC1C(O)CC(O)(C(=O)O)CC1O	0	0	0	0	0	0	0	0	0	0	0	0	0	0	0	0	0	0	0	0	0	0	0	0	0	0	0	0	0	0	0	0	0	0	0	0	0	0	0	0	0	0	0	0	0	0	0
1850	Stigmast-7-en-3-ol	CCC(CCC(C)C1CCC2C3=CCC4CC(O)CCC4(C)C3CCC21C)C(C)C	0	0	0	0	0	0	0	0	0	0	0	0	0	0	0	0	0	0	0	0	0	0	0	0	0	0	0	0	0	0	0	0	0	0	0	0	0	0	0	0	0	0	0	0	0	0	0
1851	ent-Cassa-12,15-diene	C=CC1=CCC2C(CCC3C(C)(C)CCCC23C)C1C	0	0	0	0	0	0	0	0	0	0	0	0	0	0	0	0	0	0	0	0	0	0	0	0	0	0	0	0	0	0	0	0	0	0	0	0	0	0	0	0	0	0	0	0	0	0	0
1852	Kuguacin A	CC(CC=CC(C)(C)O)C1CCC2(C)C3C(=O)C=C4C(CCC(O)C4(C)C)C3(C=O)CCC12C	0	0	0	0	0	0	0	0	0	0	0	0	0	0	0	0	0	0	0	0	0	0	0	0	0	0	0	0	0	0	0	0	0	0	0	0	0	0	0	0	0	0	0	0	0	0	0
1853	Kuguacin B	CC1(C)CC(=O)C2=C(C1)OC(N)=C(C#N)C2c1ccccc1OCc1ccc(F)cc1	0	0	0	0	0	0	0	0	0	0	0	0	0	0	0	0	0	0	0	0	0	0	0	0	0	0	0	0	0	0	0	0	0	0	0	0	0	0	0	0	0	0	0	0	0	0	0
1854	Kuguacin C	CC(=O)CC(C)C1CCC2(C)C3C(=O)C=C4C(CCC(O)C4(C)C)C3(C)CCC12C	0	0	0	0	0	0	0	0	0	0	0	0	0	0	0	0	0	0	0	0	0	0	0	0	0	0	0	0	0	0	0	0	0	0	0	0	0	0	0	0	0	0	0	0	0	0	0
1855	Kuguacin D	O=C(O)C(O)C(O)C(O)C(O)CO	0	0	0	0	0	0	0	0	0	0	0	0	0	0	0	0	0	0	0	0	0	0	0	0	0	0	0	0	0	0	0	0	0	0	0	0	0	0	0	0	0	0	0	0	0	0	0
1856	Kuguacin E	CC(=O)CC(C)C1CCC2(C)C3C(=O)CC45OCC3(CCC12C)C4CCC(O)C5(C)C	0	0	0	0	0	0	0	0	0	0	0	0	0	0	0	0	0	0	0	0	0	0	0	0	0	0	0	0	0	0	0	0	0	0	0	0	0	0	0	0	0	0	0	0	0	0	0
1857	Oryzalexin B	C=CC1(C)C=C2C(O)CC3C(C)(C)C(=O)CCC3(C)C2CC1	0	0	0	0	0	0	0	0	0	0	0	0	0	0	0	0	0	0	0	0	0	0	0	0	0	0	0	0	0	0	0	0	0	0	0	0	0	0	0	0	0	0	0	0	0	0	0
1858	Oryzalexin C	C=CC1(C)C=C2C(=O)CC3C(C)(C)C(=O)CCC3(C)C2CC1	0	0	0	0	0	0	0	0	0	0	0	0	0	0	0	0	0	0	0	0	0	0	0	0	0	0	0	0	0	0	0	0	0	0	0	0	0	0	0	0	0	0	0	0	0	0	0
1859	Oryzalexin D	C=CC1(C)C=C2C(O)CC3C(C)(C)C(O)CCC3(C)C2CC1	0	0	0	0	0	0	0	0	0	0	0	0	0	0	0	0	0	0	0	0	0	0	0	0	0	0	0	0	0	0	0	0	0	0	0	0	0	0	0	0	0	0	0	0	0	0	0
1860	Oryzalexin F	C=CC1(C)C=C2CCC3C(C)(CO)C(O)CCC3(C)C2CC1	0	0	0	0	0	0	0	0	0	0	0	0	0	0	0	0	0	0	0	0	0	0	0	0	0	0	0	0	0	0	0	0	0	0	0	0	0	0	0	0	0	0	0	0	0	0	0
1861	p-Hydroxymandelonitrile	N#CC(O)c1ccc(O)cc1	0	0	0	0	0	0	0	0	0	0	0	0	0	0	0	0	0	0	0	0	0	0	0	0	0	1	0	0	0	0	0	0	0	0	0	0	0	0	0	0	0	0	0	0	0	0	0
1862	Rapalexin A	COc1cccc2[nH]cc(N=C=S)c12	0	0	0	0	0	0	0	0	0	0	1	0	0	0	0	0	0	0	0	0	0	0	0	0	0	0	0	0	0	0	0	0	0	0	0	0	0	0	0	0	0	0	0	0	0	0	0
1863	Rapalexin B	COc1c(O)ccc2[nH]cc(N=C=S)c12	0	0	0	0	0	0	0	0	0	0	1	0	0	0	0	0	0	0	0	0	0	0	0	0	0	0	0	0	0	0	0	0	0	0	0	0	0	0	0	0	0	0	0	0	0	0	0
1864	7alpha-Hydroxycampesterol	CC(C)C(C)CCC(C)C1CCC2C3C(O)C=C4CC(O)CCC4(C)C3CCC12C	0	0	0	0	0	0	0	0	0	0	0	0	0	0	0	0	0	0	0	0	0	0	0	0	0	0	0	0	0	0	0	0	0	0	0	0	0	0	0	0	0	0	0	0	0	0	0
1865	9,10-Epoxy-18-hydroxy-octadecanoic acid	O=C(O)CCCCCCCC1OC1CCCCCCCCO	0	0	0	0	0	0	0	0	0	0	0	0	0	0	0	0	0	0	0	0	0	0	0	0	0	0	0	0	0	0	0	1	0	0	0	0	1	0	0	0	0	0	0	0	0	0	0
1866	beta-Gurjunene	C=C1CCC2C(C)CCC3C(C12)C3(C)C	0	0	0	0	0	0	0	0	0	0	0	0	0	0	0	0	0	0	0	0	0	0	0	0	0	0	0	0	0	0	0	0	0	0	0	0	0	0	0	0	0	0	0	0	0	0	0
1867	Foeniculoside X	COC(=O)c1c(OC)cc2cc3c(c(O)c2c1C)C(=O)C1(OC)C(=O)C=C(OC)C(O)C1(O)C3=O	0	0	0	0	0	0	0	0	0	0	0	0	0	0	0	0	0	0	0	0	0	0	0	0	0	0	0	0	0	0	0	0	0	0	0	0	0	0	0	0	0	0	0	0	0	0	0
1868	Foeniculoside XI	OCC1OC(Oc2cc(O)cc(C3c4c(cc(O)cc4C4c5c(C=Cc6ccc(O)cc6)cc(OC6OC(CO)C(O)C(O)C6O)cc5OC4c4ccc(O)cc4)OC3c3ccc(O)cc3)c2)C(O)C(O)C1O	0	0	0	0	0	0	0	0	0	0	0	0	0	0	0	0	0	0	0	0	0	0	0	0	0	0	0	0	0	0	0	0	0	0	0	0	0	0	0	0	0	0	0	0	0	0	0
1869	Octacosane	CCCCCCCCCCCCCCCCCCCCCCCCCCCC	0	0	0	0	0	0	0	0	0	0	0	0	0	0	0	0	0	0	0	0	0	0	0	0	0	0	0	0	0	0	0	1	0	0	0	0	0	0	0	0	0	0	0	0	0	0	0
1870	Piperchabamide D	CCC(C)NC(=O)C=CCCCCCCC=Cc1ccc2c(c1)OCO2	0	0	0	0	0	0	0	0	0	0	0	0	0	0	0	0	0	0	0	0	0	0	0	0	0	0	0	0	0	0	0	1	0	0	0	0	0	0	0	0	0	0	0	0	0	0	0
1871	Progesterone	CC(=O)C1CCC2C3CCC4=CC(=O)CCC4(C)C3CCC12C	0	0	0	0	0	0	0	0	0	0	0	0	0	0	0	0	0	0	0	0	0	0	0	0	0	0	0	0	0	0	0	0	0	0	0	0	0	0	0	0	0	0	0	0	0	0	0
1872	Hentriacontan-8-one	CCCCCCCCCCCCCCCCCC(=O)CCCCCCCCCCCCC	0	0	0	0	0	0	0	0	0	0	0	0	0	0	0	0	0	0	0	0	0	0	0	0	0	0	0	0	0	0	0	1	0	0	0	0	0	0	0	0	0	0	0	0	0	0	0
1873	Nonacosan-8-one	COc1ccc(CC(C)N)cc1	0	0	0	0	0	0	0	0	0	0	0	0	0	0	0	0	0	0	0	0	0	0	0	0	0	0	0	0	0	0	0	0	0	0	0	0	0	0	0	0	0	0	0	0	0	0	0
1874	Tritriacontan-10-one	CCCCCCCCCCCCCCCCCCCCCCCC(=O)CCCCCCCCC	0	0	0	0	0	0	0	0	0	0	0	0	0	0	0	0	0	0	0	0	0	0	0	0	0	0	0	0	0	0	0	1	0	0	0	0	0	0	0	0	0	0	0	0	0	0	0
1875	Tritriacontan-12-one	CCCCCCCCCCCCCCCCCCCCCC(=O)CCCCCCCCCCC	0	0	0	0	0	0	0	0	0	0	0	0	0	0	0	0	0	0	0	0	0	0	0	0	0	0	0	0	0	0	0	1	0	0	0	0	0	0	0	0	0	0	0	0	0	0	0
1876	Tritriacontan-14-one	CCCCCCCCCCCCCCCCCCCC(=O)CCCCCCCCCCCCC	0	0	0	0	0	0	0	0	0	0	0	0	0	0	0	0	0	0	0	0	0	0	0	0	0	0	0	0	0	0	0	1	0	0	0	0	0	0	0	0	0	0	0	0	0	0	0
1877	Tritriacontan-16-one	CCCCCCCCCCCCCCCCCC(=O)CCCCCCCCCCCCCCC	0	0	0	0	0	0	0	0	0	0	0	0	0	0	0	0	0	0	0	0	0	0	0	0	0	0	0	0	0	0	0	1	0	0	0	0	0	0	0	0	0	0	0	0	0	0	0
1878	Tritriacontan-8-one	CCCCCCCCCCCCCCCCCCCCCCCCCC(=O)CCCCCCC	0	0	0	0	0	0	0	0	0	0	0	0	0	0	0	0	0	0	0	0	0	0	0	0	0	0	0	0	0	0	0	1	0	0	0	0	0	0	0	0	0	0	0	0	0	0	0
1879	Dotriacontan-14-ol	CCCCCCCCCCCCCCCCCCC(O)CCCCCCCCCCCCC	0	0	0	0	0	0	0	0	0	0	0	0	0	0	0	0	0	0	0	0	0	0	0	0	0	0	0	0	0	0	0	1	0	0	0	0	0	0	0	0	0	0	0	0	0	0	0
1880	Dotriacontan-15-ol	CCCCCCCCCCCCCCCCCC(O)CCCCCCCCCCCCCC	0	0	0	0	0	0	0	0	0	0	0	0	0	0	0	0	0	0	0	0	0	0	0	0	0	0	0	0	0	0	0	1	0	0	0	0	0	0	0	0	0	0	0	0	0	0	0
1881	Dotriacontan-16-ol	CCCCCCCCCCCCCCCCC(O)CCCCCCCCCCCCCCC	0	0	0	0	0	0	0	0	0	0	0	0	0	0	0	0	0	0	0	0	0	0	0	0	0	0	0	0	0	0	0	1	0	0	0	0	0	0	0	0	0	0	0	0	0	0	0
1882	Nonacosan-13-ol	CCCCCCCCCCCCCCCCCC(O)CCCCCCCCCCC	0	0	0	0	0	0	0	0	0	0	0	0	0	0	0	0	0	0	0	0	0	0	0	0	0	0	0	0	0	0	0	1	0	0	0	0	0	0	0	0	0	0	0	0	0	0	0
1883	Nonacosan-14-ol	CCCCCCCCCCCCCCCCC(O)CCCCCCCCCCCC	0	0	0	0	0	0	0	0	0	0	0	0	0	0	0	0	0	0	0	0	0	0	0	0	0	0	0	0	0	0	0	1	0	0	0	0	0	0	0	0	0	0	0	0	0	0	0
1884	4',5'-Dihydropsoralen	O=c1ccc2cc3c(cc2o1)OCC3	0	0	0	0	0	0	0	0	0	0	0	0	0	0	0	0	0	0	0	0	0	0	0	0	0	0	0	0	0	0	0	0	0	0	0	0	0	0	0	0	0	0	0	0	0	0	0
1885	[12]-Shogaol	CCCCCCCCCCCC=CC(=O)CCc1ccc(O)c(OC)c1	0	0	0	0	0	0	0	0	0	0	0	0	0	0	0	0	0	0	0	0	0	0	0	0	0	0	0	0	0	0	0	1	0	0	0	0	0	0	0	0	0	0	0	0	0	0	0
1886	[4]-Gingerol	CCCC(O)CC(=O)CCc1ccc(O)c(OC)c1	0	0	0	0	0	0	0	0	0	0	0	0	0	0	0	0	0	0	0	0	0	0	0	0	0	0	0	0	0	0	0	0	0	0	0	0	0	0	0	0	0	0	0	0	0	0	0
1887	[4]-Isogingerol	CCCC(=O)CC(O)CCc1ccc(O)c(OC)c1	0	0	0	0	0	0	0	0	0	0	0	0	0	0	0	0	0	0	0	0	0	0	0	0	0	0	0	0	0	0	0	0	0	0	0	0	0	0	0	0	0	0	0	0	0	0	0
1888	[4]-Shogaol	CCCC=CC(=O)CCc1ccc(O)c(OC)c1	0	0	0	0	0	0	0	0	0	0	0	0	0	0	0	0	0	0	0	0	0	0	0	0	0	0	0	0	0	0	0	0	0	0	0	0	0	0	0	0	0	0	0	0	0	0	0
1889	[7]-Gingerol	CCCCCCC(O)CC(=O)CCc1ccc(O)c(OC)c1	0	0	0	0	0	0	0	0	0	0	0	0	0	0	0	0	0	0	0	0	0	0	0	0	0	0	0	0	0	0	0	0	0	0	0	0	0	0	0	0	0	0	0	0	0	0	0
1890	[8]-Gingerdiol	CCCCCCCC(CC(CCc1ccc(O)c(OC)c1)OC(C)=O)OC(C)=O	0	0	0	0	0	0	0	0	0	0	0	0	0	0	0	0	0	0	0	0	0	0	0	0	0	0	0	0	0	0	0	0	0	0	0	0	0	0	0	0	0	0	0	0	0	0	0
1891	1-Dehydro-[10]-gingerdione	CCCCCCCCCC(=O)CC(=O)C=Cc1ccc(O)c(OC)c1	0	0	0	0	0	0	0	0	0	0	0	0	0	0	0	0	0	0	0	0	0	0	0	0	0	0	0	0	0	0	0	1	0	0	0	0	0	0	0	0	0	0	0	0	0	0	0
1892	1-Dehydro-[6]-gingerdione	CCCCCC(O)=CC(=O)C=Cc1ccc(O)c(OC)c1	0	0	0	0	0	0	0	0	0	0	0	0	0	0	0	0	0	0	0	0	0	0	0	0	0	0	0	0	0	0	0	0	0	0	0	0	0	0	0	0	0	0	0	0	0	0	0
1893	1-Dehydro-[8]-gingerdione	CCCCCCCC(=O)CC(=O)C=Cc1ccc(O)c(OC)c1	0	0	0	0	0	0	0	0	0	0	0	0	0	0	0	0	0	0	0	0	0	0	0	0	0	0	0	0	0	0	0	0	0	0	0	0	0	0	0	0	0	0	0	0	0	0	0
1894	Acetoxy-[10]-gingerol	CCCCCCCCCC(CC(=O)CCc1ccc(C)c(OC)c1)OC(C)=O	0	0	0	0	0	0	0	0	0	0	0	0	0	0	0	0	0	0	0	0	0	0	0	0	0	0	0	0	0	0	0	1	0	0	0	0	0	0	0	0	0	0	0	0	0	0	0
1895	Dehydrogingerdione	CCCCCC(=O)C=C(O)C=Cc1ccc(O)c(OC)c1	0	0	0	0	0	0	0	0	0	0	0	0	0	0	0	0	0	0	0	0	0	0	0	0	0	0	0	0	0	0	0	0	0	0	0	0	0	0	0	0	0	0	0	0	0	0	0
1896	Diacetoxy-[4]-gingerdiol	CCCC(CC(CCc1ccc(O)c(OC)c1)OC(C)=O)OC(C)=O	0	0	0	0	0	0	0	0	0	0	0	0	0	0	0	0	0	0	0	0	0	0	0	0	0	0	0	0	0	0	0	0	0	0	0	0	0	0	0	0	0	0	0	0	0	0	0
1897	Hexahydrocurcumin	COc1cc(CCC(=O)CC(O)CCc2ccc(O)c(OC)c2)ccc1O	0	0	0	0	0	0	0	0	0	0	0	0	0	0	0	0	0	0	0	0	0	0	0	0	0	0	0	0	0	0	0	0	0	0	0	0	0	0	0	0	0	0	0	0	0	0	0
1898	Methyl [6]-paradol	CCCCCCCC(=O)CCc1ccc(OC)c(OC)c1	0	0	0	0	0	0	0	0	0	0	0	0	0	0	0	0	0	0	0	0	0	0	0	0	0	0	0	0	0	0	0	0	0	0	0	0	0	0	0	0	0	0	0	0	0	0	0
1899	Methyl [8]-Shogaol	CCCCCCCC=CC(=O)CCc1ccc(OC)c(OC)c1	0	0	0	0	0	0	0	0	0	0	0	0	0	0	0	0	0	0	0	0	0	0	0	0	0	0	0	0	0	0	0	1	0	0	0	0	0	0	0	0	0	0	0	0	0	0	0
1900	Hulupinic acid	CC(C)=CCC1(CC=C(C)C)C(=O)C(O)=C(O)C1=O	0	0	0	0	0	0	0	0	0	0	0	0	0	0	0	0	0	0	0	0	0	0	0	0	0	0	0	0	0	0	0	0	0	0	0	0	0	0	0	0	0	0	0	0	0	0	0
1901	Hulupone	CC(C)=CCC1(CC=C(C)C)C(=O)C(O)=C(C(=O)CC(C)C)C1=O	0	0	0	0	0	0	0	0	0	0	0	0	0	0	0	0	0	0	0	0	0	0	0	0	0	0	0	0	0	0	0	0	0	0	0	0	0	0	0	0	0	0	0	0	0	0	0
1902	Humulinic acid A	CC(C)=CCC1C(=O)C(C(=O)CC(C)C)=C(O)C1O	0	0	0	0	0	0	0	0	0	0	0	0	0	0	0	0	0	0	0	0	0	0	0	0	0	0	0	0	0	0	0	0	0	0	0	0	0	0	0	0	0	0	0	0	0	0	0
1903	Humulinic acid B	CC(C)=CCC1C(=O)C(C(=O)CC(C)C)=C(O)C1O	0	0	0	0	0	0	0	0	0	0	0	0	0	0	0	0	0	0	0	0	0	0	0	0	0	0	0	0	0	0	0	0	0	0	0	0	0	0	0	0	0	0	0	0	0	0	0
1904	Humulinone	CC(C)=CCC(=O)C1(O)C(O)=C(C(=O)CC(C)C)C(=O)C1(O)CC=C(C)C	0	0	0	0	0	0	0	0	0	0	0	0	0	0	0	0	0	0	0	0	0	0	0	0	0	0	0	0	0	0	0	0	0	0	0	0	0	0	0	0	0	0	0	0	0	0	0
1905	Neosilyhermin A	COc1cc(C2Oc3c(O)ccc(C4CC(=O)c5c(O)cc(O)cc5O4)c3C2CO)ccc1O	0	0	0	0	0	0	0	0	0	0	0	0	0	0	0	0	0	0	0	0	0	0	0	0	0	0	0	0	0	0	0	0	0	0	0	0	0	0	0	0	0	0	0	0	0	0	0
1906	3-Hydroxy-3-(3,4-dihydroxy-4-methylpentanoyl)-5-(3-methylbutyl)-1,2,4-cyclopentanetrione	CC(C)CC(=O)C1=C(O)C(O)(C(=O)CC(O)C(C)(C)O)C(=O)C1=O	0	0	0	0	0	0	0	0	0	0	0	0	0	0	0	0	0	0	0	0	0	0	0	0	0	0	0	0	0	0	0	0	0	0	0	0	0	0	0	0	0	0	0	0	0	0	0
1907	Cudraflavone A	CC(C)=CC1Oc2cc(O)ccc2-c2oc3cc4c(c(O)c3c(=O)c21)C=CC(C)(C)O4	0	0	0	0	0	0	0	0	0	0	0	0	0	0	0	0	0	0	0	0	0	0	0	0	0	0	0	0	0	0	0	0	0	0	0	0	0	0	0	0	0	0	0	0	0	0	0
1908	Albanol B	Cc1cc2c3c(c1)-c1c(O)cc(-c4cc5ccc(O)cc5o4)cc1OC3(c1ccc(O)cc1O)Oc1cc(O)ccc1-2	0	0	0	0	0	0	0	0	0	0	0	0	0	0	0	0	0	0	0	0	0	0	0	0	0	0	0	0	0	0	0	0	0	0	0	0	0	0	0	0	0	0	0	0	0	0	0
1909	(Ã¥Â±)-3-Octanol	CCCCCC(O)CC	0	0	0	0	0	0	0	0	0	0	0	0	0	0	0	0	0	0	0	0	0	0	0	0	0	0	0	0	0	0	0	0	0	0	0	0	0	0	0	0	0	0	0	0	0	0	0
1910	Celerin	C=CC(C)(C)c1cc(OC)c(O)c2oc(=O)ccc12	0	0	0	0	0	0	0	0	0	0	0	0	0	0	0	0	0	0	0	0	0	0	0	0	0	0	0	0	0	0	0	0	0	0	0	0	0	0	0	0	0	0	0	0	0	0	0
1912	Homoferreirin	COc1ccc(C2COc3cc(O)cc(O)c3C2=O)c(OC)c1	0	0	0	0	0	0	0	0	0	0	0	0	0	0	0	0	0	0	0	0	0	0	0	0	0	0	0	0	0	0	0	0	0	0	0	0	0	0	0	0	0	0	0	0	0	0	0
1913	Kuwanon J	CC(C)=CCc1c(O)ccc(C(=O)C2C(c3c(O)ccc(C(=O)C=Cc4ccc(O)cc4O)c3O)C=C(C)CC2c2ccc(O)cc2O)c1O	0	0	0	0	0	0	0	0	0	0	0	0	0	0	0	0	0	0	0	0	0	0	0	0	0	0	0	0	0	0	0	0	0	0	0	0	0	0	0	0	0	0	0	0	0	0	0
1914	Kuwanon Q	CC(C)=CCc1c(O)ccc(C(=O)C2C(c3c(O)ccc(C(=O)C=Cc4ccc(O)cc4O)c3O)C=C(C)CC2c2ccc(O)cc2)c1O	0	0	0	0	0	0	0	0	0	0	0	0	0	0	0	0	0	0	0	0	0	0	0	0	0	0	0	0	0	0	0	0	0	0	0	0	0	0	0	0	0	0	0	0	0	0	0
1915	Kuwanon R	CC(C)=CCc1c(O)ccc(C(=O)C2C(c3c(O)ccc(C(=O)C=Cc4ccc(O)cc4)c3O)C=C(C)CC2c2ccc(O)cc2O)c1O	0	0	0	0	0	0	0	0	0	0	0	0	0	0	0	0	0	0	0	0	0	0	0	0	0	0	0	0	0	0	0	0	0	0	0	0	0	0	0	0	0	0	0	0	0	0	0
1916	Kuwanon V	CC(C)=CCc1c(O)ccc(C(=O)C2C(c3c(O)ccc(C(=O)C=Cc4ccc(O)cc4)c3O)C=C(C)CC2c2ccc(O)cc2)c1O	0	0	0	0	0	0	0	0	0	0	0	0	0	0	0	0	0	0	0	0	0	0	0	0	0	0	0	0	0	0	0	0	0	0	0	0	0	0	0	0	0	0	0	0	0	0	0
1917	Withaperuvin D	CC1=C(C)C(=O)OC(C(C)(O)C2(O)CCC3(O)C4CC5OC6CC(=O)C(C)(C4CCC32C)C5(O)C6O)C1	0	0	0	0	0	0	0	0	0	0	0	0	0	0	0	0	0	0	0	0	0	0	0	0	0	0	0	0	0	0	0	0	0	0	0	0	0	0	0	0	0	0	0	0	0	0	0
1918	Asparagoside G	CC(CCC1(O)OC2CC3C4CCC5CC(OC6OC(CO)C(OC7OC(CO)C(O)C(O)C7O)C(OC7OC(CO)C(O)C(O)C7O)C6O)CCC5(C)C4CCC3(C)C2C1C)COC1OC(CO)C(O)C(O)C1O	0	0	0	0	0	0	0	0	0	0	0	0	0	0	0	0	0	0	0	0	0	0	0	0	0	0	0	0	0	0	0	0	0	0	0	0	0	0	0	0	0	0	0	0	0	0	0
1919	Sarsaparilloside	CC(CCC1(O)OC2CC3C4CCC5CC(OC6OC(COC7OC(CO)C(O)C(O)C7O)C(OC7OC(C)C(O)C(O)C7O)C(O)C6OC6OC(CO)C(O)C(O)C6O)CCC5(C)C4CCC3(C)C2C1C)COC1OC(CO)C(O)C(O)C1O	0	0	0	0	0	0	0	0	0	0	0	0	0	0	0	0	0	0	0	0	0	0	0	0	0	0	0	0	0	0	0	0	0	0	0	0	0	0	0	0	0	0	0	0	0	0	0
1920	Perulactone B	CC1C(=O)OCC1CC(O)C(C)(O)C1(O)CCC2(O)C3CC=C4CC=CC(=O)C4(C)C3CCC21C	0	0	0	0	0	0	0	0	0	0	0	0	0	0	0	0	0	0	0	0	0	0	0	0	0	0	0	0	0	0	0	0	0	0	0	0	0	0	0	0	0	0	0	0	0	0	0
1921	(S)-Angelicain	CC(C)(O)C1Cc2c(cc3oc(CO)cc(=O)c3c2O)O1	0	0	0	0	0	0	0	0	0	0	0	0	0	0	0	0	0	0	0	0	0	0	0	0	0	0	0	0	0	0	0	0	0	0	0	0	0	0	0	0	0	0	0	0	0	0	0
1922	Kuwanon L	CC1=CC(c2c(O)ccc(C3CC(=O)c4c(O)cc(O)cc4O3)c2O)C(C(=O)c2cc(O)cc(O)c2)C(c2ccc(O)cc2O)C1	0	0	0	0	0	0	0	0	0	0	0	0	0	0	0	0	0	0	0	0	0	0	0	0	0	0	0	0	0	0	0	0	0	0	0	0	0	0	0	0	0	0	0	0	0	0	0
1923	Kuwanon K	CC(C)=CCc1c(-c2ccc(O)c(C3C=C(C)CC(c4ccc(O)cc4O)C3C(=O)c3cc(O)cc(O)c3)c2O)oc2cc(O)cc(O)c2c1=O	0	0	0	0	0	0	0	0	0	0	0	0	0	0	0	0	0	0	0	0	0	0	0	0	0	0	0	0	0	0	0	0	0	0	0	0	0	0	0	0	0	0	0	0	0	0	0
1924	Ergostan-3-ol	CC(C)C(C)CCC(C)C1CCC2C3CCC4CC(O)CCC4(C)C3CCC12C	0	0	0	0	0	0	0	0	0	0	0	0	0	0	0	0	0	0	0	0	0	0	0	0	0	0	0	0	0	0	0	0	0	0	0	0	0	0	0	0	0	0	0	0	0	0	0
1925	Chalinastanol	CC(C)C(C)CCC(C)C1CCC2C3CCC4CC(O)CCC4(C)C3CCC12C	0	0	0	0	0	0	0	0	0	0	0	0	0	0	0	0	0	0	0	0	0	0	0	0	0	0	0	0	0	0	0	0	0	0	0	0	0	0	0	0	0	0	0	0	0	0	0
1926	(3beta,5alpha,24S)-Ergost-8(14)-en-3-ol	CC(C)C(C)CCC(C)C1CCC2=C3CCC4CC(O)CCC4(C)C3CCC21C	0	0	0	0	0	0	0	0	0	0	0	0	0	0	0	0	0	0	0	0	0	0	0	0	0	0	0	0	0	0	0	0	0	0	0	0	0	0	0	0	0	0	0	0	0	0	0
1927	Prenol	CC(C)=CCO	0	0	0	0	0	0	0	0	0	0	0	0	0	0	0	0	0	0	0	0	0	0	0	0	0	0	0	0	0	0	0	0	0	0	0	0	0	0	0	0	0	0	0	0	0	0	0
1928	24-Methylenepollinasterol	C=C(CCC(C)C1CCC2(C)C3CCC4CC(O)CCC45CC35CCC12C)C(C)C	0	0	0	0	0	0	0	0	0	0	0	0	0	0	0	0	0	0	0	0	0	0	0	0	0	0	0	0	0	0	0	0	0	0	0	0	0	0	0	0	0	0	0	0	0	0	0
1929	3-Methyl-3-butenol	C=C(C)CCO	0	0	0	0	0	0	0	0	0	0	0	0	0	0	0	0	0	0	0	0	0	0	0	0	0	0	0	0	0	0	0	0	0	0	0	0	0	0	0	0	0	0	0	0	0	0	0
1930	Withaperuvin E	CC1=C(C)C(=O)OC(C(C)(O)C2(O)CCC3(O)C4CC5OC56C(=O)C=CC(=O)C6(C)C4CCC32C)C1	0	0	0	0	0	0	0	0	0	0	0	0	0	0	0	0	0	0	0	0	0	0	0	0	0	0	0	0	0	0	0	0	0	0	0	0	1	0	0	0	0	0	0	0	0	0	0
1931	Succinic acid	O=C(O)CCC(=O)O	0	0	0	0	0	0	0	0	0	0	0	0	0	0	0	0	0	0	0	0	0	0	0	0	0	0	0	0	0	0	0	0	0	0	0	0	0	0	0	0	0	0	0	0	0	0	0
1932	Physalin B	CC12C(=O)C=CCC1=CCC1C2CCC2(O)C(=O)OC3(C)C4CC5(C)C(COC16OC23C5C6=O)C(=O)O4	0	0	0	0	0	0	0	0	0	0	0	0	0	0	0	0	0	0	0	0	0	0	0	0	0	0	0	0	0	0	0	0	0	0	0	0	0	0	0	0	0	0	0	0	0	0	0
1933	Plastoquinone 8	CC(C)=CCCC(C)=CCCC(C)=CCCC(C)=CCCC(C)=CCCC(C)=CCCC(C)=CCCC(C)=CCC1=CC(=O)C(C)=C(C)C1=O	0	0	0	0	0	0	0	0	0	0	0	0	0	0	0	0	0	0	0	0	0	0	0	0	0	0	0	0	0	0	0	0	0	0	0	0	0	0	0	0	0	0	0	0	0	0	0
1934	Plastoquinone 9	CC(C)=CCCC(C)=CCCC(C)=CCCC(C)=CCCC(C)=CCCC(C)=CCCC(C)=CCCC(C)=CCCC(C)=CCC1=CC(=O)C(C)=C(C)C1=O	0	0	0	0	0	0	0	0	0	0	0	0	0	0	0	0	0	0	0	0	0	0	0	0	0	0	0	0	0	0	0	0	0	0	0	0	0	0	0	0	0	0	0	0	0	0	0
1935	gamma-Pyrufuran	COc1c(O)c(OC)c2c(oc3cc(O)ccc32)c1OC	0	0	0	0	0	0	0	0	0	0	0	0	0	0	0	0	0	0	0	0	0	0	0	0	0	0	0	0	0	0	0	0	0	0	0	0	0	0	0	0	0	0	0	0	0	0	0
1936	Stigmasterol	CCC(C=CC(C)C1CCC2C3CC=C4CC(O)CCC4(C)C3CCC12C)C(C)C	0	0	0	0	0	0	0	0	0	0	0	0	0	0	0	0	0	0	0	0	0	0	0	0	0	0	0	0	0	0	0	0	0	0	0	0	0	0	0	0	0	0	0	0	0	0	0
1937	Isonuatigenin 3-[rhamnosyl-(1->2)-glucoside]	CC1OC(OC2C(OC3CCC4(C)C(=CCC5C4CCC4(C)C5CC5OC6(CCC(C)(O)CO6)C(C)C54)C3)OC(CO)C(O)C2O)C(O)C(O)C1O	0	0	0	0	0	0	0	0	0	0	0	0	0	0	0	0	0	0	0	0	0	0	0	0	0	0	0	0	0	0	0	0	0	0	0	0	0	0	0	0	0	0	0	0	0	0	0
1938	Asticolorin A	CC1=CC2c3c(cc4oc5cc(C)cc(O)c5c4c3C)OC3(O)C(O)c4oc5cc(C)cc(O)c5c4C(C)(C1)C23	0	0	0	0	0	0	0	0	0	0	0	0	0	0	0	0	0	0	0	0	0	0	0	0	0	0	0	0	0	0	0	0	0	0	0	0	0	0	0	0	0	0	0	0	0	0	0
1939	Asticolorin B	CC1=CC2c3c(cc4oc5cc(C)cc(O)c5c4c3C)OC3(O)C(=O)c4oc5cc(C)cc(O)c5c4C(C)(C1)C23	0	0	0	0	0	0	0	0	0	0	0	0	0	0	0	0	0	0	0	0	0	0	0	0	0	0	0	0	0	0	0	0	0	0	0	0	0	0	0	0	0	0	0	0	0	0	0
1940	Asticolorin C	CC1=CC2c3c(cc4oc5cc(CO)cc(O)c5c4c3C)OC3(O)C(=O)c4oc5cc(CO)cc(O)c5c4C(C)(C1)C23	0	0	0	0	0	0	0	0	0	0	0	0	0	0	0	0	0	0	0	0	0	0	0	0	0	0	0	0	0	0	0	0	0	0	0	0	0	0	0	0	0	0	0	0	0	0	0
1941	Adhulupone	CCC(C)C(=O)C1C(=O)C(=O)C(CC=C(C)C)(CC=C(C)C)C1=O	0	0	0	0	0	0	0	0	0	0	0	0	0	0	0	0	0	0	0	0	0	0	0	0	0	0	0	0	0	0	0	0	0	0	0	0	0	0	0	0	0	0	0	0	0	0	0
1942	Adhumulinic acid	CCC(C)C(=O)C1C(=O)C(O)C(CC=C(C)C)C1=O	0	0	0	0	0	0	0	0	0	0	0	0	0	0	0	0	0	0	0	0	0	0	0	0	0	0	0	0	0	0	0	0	0	0	0	0	0	0	0	0	0	0	0	0	0	0	0
1943	Adhumulone	CCC(C)C(=O)C1=C(O)C(CC=C(C)C)C(=O)C(O)(CC=C(C)C)C1=O	0	0	0	0	0	0	0	0	0	0	0	0	0	0	0	0	0	0	0	0	0	0	0	0	0	0	0	0	0	0	0	0	0	0	0	0	0	0	0	0	0	0	0	0	0	0	0
1944	22,23-Dihydroergosterol	CC(C)CC(C)CC(C)C1CCC2C3=CC=C4CC(O)CCC4(C)C3CCC21C	0	0	0	0	0	0	0	0	0	0	0	0	0	0	0	0	0	0	0	0	0	0	0	0	0	0	0	0	0	0	0	0	0	0	0	0	0	0	0	0	0	0	0	0	0	0	0
1945	Adlupulone	CCC(C)C(=O)C1=C(O)C(CC=C(C)C)C(=O)C(CC=C(C)C)(CC=C(C)C)C1=O	0	0	0	0	0	0	0	0	0	0	0	0	0	0	0	0	0	0	0	0	0	0	0	0	0	0	0	0	0	0	0	0	0	0	0	0	0	0	0	0	0	0	0	0	0	0	0
1946	L-Leucine	CC(C)CC(N)C(=O)O	0	0	0	0	0	0	0	0	0	0	0	0	0	0	0	0	0	0	0	0	0	0	0	0	0	0	0	0	0	0	0	0	0	0	0	0	0	0	0	0	0	0	0	0	0	0	0
1947	Isosojagol	CC(C)=CCc1c(O)ccc2c1oc1c3ccc(O)cc3oc(=O)c21	0	0	0	0	0	0	0	0	0	0	0	0	0	0	0	0	0	0	0	0	0	0	0	0	0	0	0	0	0	0	0	0	0	0	0	0	0	0	0	0	0	0	0	0	0	0	0
1948	Indicolactone	CC(=CCOc1c2occc2cc2ccc(=O)oc12)CC1C=C(C)C(=O)O1	0	0	0	0	0	0	0	0	0	0	0	0	0	0	0	0	0	0	0	0	0	0	0	0	0	0	0	0	0	0	0	0	0	0	0	0	0	0	0	0	0	0	0	0	0	0	0
1949	Physalolactone C	CC1=C(C)C(=O)OC(C(C)(O)C2(O)CC=C3C4CC(Cl)C5(O)C(O)C=CC(=O)C5(C)C4CCC32C)C1	1	0	0	0	0	0	0	0	0	0	0	0	0	0	0	0	0	0	0	0	0	0	0	0	0	0	0	0	0	0	0	0	0	0	0	0	0	0	0	0	0	0	0	0	0	0	0
1950	Angelical	COc1cc2oc(=O)ccc2cc1C=O	0	0	0	0	0	0	0	0	0	0	0	0	0	0	0	0	0	0	0	0	0	0	0	0	0	0	0	0	0	0	0	0	0	0	0	0	0	0	0	0	0	0	0	0	0	0	0
1951	Talaromycin A	CCC1CCC2(CC(O)C(CO)CO2)OC1	0	0	0	0	0	0	0	0	0	0	0	0	0	0	0	0	0	0	0	0	0	0	0	0	0	0	0	0	0	0	0	0	0	0	0	0	0	0	0	0	0	0	0	0	0	0	0
1952	alpha-Cotonefuran	COc1c(O)cc2c(oc3c(OC)c(O)ccc32)c1OC	0	0	0	0	0	0	0	0	0	0	0	0	0	0	0	0	0	0	0	0	0	0	0	0	0	0	0	0	0	0	0	0	0	0	0	0	0	0	0	0	0	0	0	0	0	0	0
1953	Ascochitine	CCC(C)c1occ2c(O)c(C(=O)O)c(=O)cc-2c1C	0	0	0	0	0	0	0	0	0	0	0	0	0	0	0	0	0	0	0	0	0	0	0	0	0	0	0	0	0	0	0	0	0	0	0	0	0	0	0	0	0	0	0	0	0	0	0
1954	(3xi,6E)-1,7-Diphenyl-6-hepten-3-ol	OC(CCC=Cc1ccccc1)CCc1ccccc1	0	0	0	0	0	0	0	0	0	0	0	0	0	0	0	0	0	0	0	0	0	0	0	0	0	0	0	0	0	0	0	0	0	0	0	0	0	0	0	0	0	0	0	0	0	0	0
1955	Prehumulone	CC(C)=CCC1C(=O)C(C(=O)CCC(C)C)=C(O)C(O)(CC=C(C)C)C1=O	0	0	0	0	0	0	0	0	0	0	0	0	0	0	0	0	0	0	0	0	0	0	0	0	0	0	0	0	0	0	0	0	0	0	0	0	0	0	0	0	0	0	0	0	0	0	0
1956	Prehumulinic acid	CC(C)=CCC1C(=O)C(C(=O)CCC(C)C)=C(O)C1O	0	0	0	0	0	0	0	0	0	0	0	0	0	0	0	0	0	0	0	0	0	0	0	0	0	0	0	0	0	0	0	0	0	0	0	0	0	0	0	0	0	0	0	0	0	0	0
1957	Glisoflavanone	CC(C)=CCc1c(O)ccc(C2COc3cc(O)c(CC=C(C)C)c(O)c3C2=O)c1O	0	0	0	0	0	0	0	0	0	0	0	0	0	0	0	0	0	0	0	0	0	0	0	0	0	0	0	0	0	0	0	0	0	0	0	0	0	0	0	0	0	0	0	0	0	0	0
1958	Jasmine ketolactone	O=C1CC2CCC(=O)C2CC=CCCO1	0	0	0	0	0	0	0	0	0	0	0	0	0	0	0	0	0	0	0	0	0	0	0	0	0	0	0	0	0	0	0	0	0	0	0	0	0	0	0	0	0	0	0	0	0	0	0
1959	beta-Sitosterol acetate	CCC(CCC(C)C1CCC2C3CC=C4CC(OC(C)=O)CCC4(C)C3CCC12C)C(C)C	0	0	0	0	0	0	0	0	0	0	0	0	0	0	0	0	0	0	0	0	0	0	0	0	0	0	0	0	0	0	0	0	0	0	0	0	0	0	0	0	0	0	0	0	0	0	0
1960	3,5-Dihydroxy-4-methoxybenzoic acid	COc1c(O)cc(C(=O)O)cc1O	0	0	0	0	0	0	0	0	0	0	0	0	0	0	0	0	0	0	0	0	0	0	0	0	0	0	0	0	0	0	0	0	0	0	0	0	0	0	0	0	0	0	0	0	0	0	0
1961	4'-Hydroxy-5,7-dimethoxyflavan	COc1cc(OC)c2c(c1)OC(c1ccc(O)cc1)CC2	0	0	0	0	0	0	0	0	0	0	0	0	0	0	0	0	0	0	0	0	0	0	0	0	0	0	0	0	0	0	0	0	0	0	0	0	0	0	0	0	0	0	0	0	0	0	0
1962	Austalide H	COC(=O)CCC1(C)C(C(C)(C)O)C(O)CC2(C)Oc3c(C)c4c(c(OC)c3CC21)C(=O)OC4	0	0	0	0	0	0	0	0	0	0	0	0	0	0	0	0	0	0	0	0	0	0	0	0	0	0	0	0	0	0	0	0	0	0	0	0	0	0	0	0	0	0	0	0	0	0	0
1963	Austalide G	COC(=O)CCC1(C)C(C(C)(C)O)C(OC(C)=O)CC2(C)Oc3c(C)c4c(c(OC)c3CC21)C(=O)OC4	0	0	0	0	0	0	0	0	0	0	0	0	0	0	0	0	0	0	0	0	0	0	0	0	0	0	0	0	0	0	0	0	0	0	0	0	0	0	0	0	0	0	0	0	0	0	0
1964	Austalide I	COc1c2c(c(C)c3c1C(=O)OC3)OC1(C)CC(OC(C)=O)C3C(C)(C)OC(=O)CCC3(C)C1C2	0	0	0	0	0	0	0	0	0	0	0	0	0	0	0	0	0	0	0	0	0	0	0	0	0	0	0	0	0	0	0	0	0	0	0	0	0	0	0	0	0	0	0	0	0	0	0
1965	Austalide J	COc1c2c(c(C)c3c1C(=O)OC3)OC1(C)CCC3(O)C(C)(C)OC(=O)CCC3(C)C1C2	0	0	0	0	0	0	0	0	0	0	0	0	0	0	0	0	0	0	0	0	0	0	0	0	0	0	0	0	0	0	0	0	0	0	0	0	0	0	0	0	0	0	0	0	0	0	0
1966	Austalide K	COc1c2c(c(C)c3c1C(=O)OC3)OC1(C)CCC3C(C)(C)C(=O)CCC3(C)C1C2	0	0	0	0	0	0	0	0	0	0	0	0	0	0	0	0	0	0	0	0	0	0	0	0	0	0	0	0	0	0	0	0	0	0	0	0	0	0	0	0	0	0	0	0	0	0	0
1967	Austalide L	COc1c2c(c(C)c3c1C(=O)OC3)OC1(C)CCC3(O)C(C)(C)C(=O)CCC3(C)C1C2	0	0	0	0	0	0	0	0	0	0	0	0	0	0	0	0	0	0	0	0	0	0	0	0	0	0	0	0	0	0	0	0	0	0	0	0	0	0	0	0	0	0	0	0	0	0	0
1968	8-Hydroxyquercetagetin	O=c1c(O)c(-c2ccc(O)c(O)c2)oc2c(O)c(O)c(O)c(O)c12	0	0	0	0	0	0	0	0	0	0	0	0	0	0	0	0	0	0	0	0	0	0	0	0	0	0	0	0	0	0	0	0	0	0	0	0	0	1	1	0	0	0	0	0	0	0	0
1969	Natsudaidain	COc1ccc(-c2oc3c(OC)c(OC)c(OC)c(OC)c3c(=O)c2O)cc1OC	0	0	0	0	0	0	0	0	0	0	0	0	0	0	0	0	0	0	0	0	0	0	0	0	0	0	0	0	0	0	0	0	0	0	0	0	0	0	0	0	0	0	0	0	0	0	0
1970	5-Hydroxy-3,3',4',6,7,8-hexamethoxyflavone	COc1ccc(-c2oc3c(OC)c(OC)c(OC)c(O)c3c(=O)c2OC)cc1OC	0	0	0	0	0	0	0	0	0	0	0	0	0	0	0	0	0	0	0	0	0	0	0	0	0	0	0	0	0	0	0	0	0	0	0	0	0	0	0	0	0	0	0	0	0	0	0
1971	Nevskin	CC1(O)CCC2C(C)(C)C(O)CCC2(C)C1COc1ccc2ccc(=O)oc2c1	0	0	0	0	0	0	0	0	0	0	0	0	0	0	0	0	0	0	0	0	0	0	0	0	0	0	0	0	0	0	0	0	0	0	0	0	0	0	0	0	0	0	0	0	0	0	0
1972	Galbanic acid	CC(C)=C1CCC(C)C(C)(COc2ccc3ccc(=O)oc3c2)C1CCC(=O)O	0	0	0	0	0	0	0	0	0	0	0	0	0	0	0	0	0	0	0	0	0	0	0	0	0	0	0	0	0	0	0	0	0	0	0	0	0	0	0	0	0	0	0	0	0	0	0
1973	Cyclonormammein	CCCC(=O)c1c(O)c2c(c3c(CCC)cc(=O)oc13)OC(C(C)(C)O)C2	0	0	0	0	0	0	0	0	0	0	0	0	0	0	0	0	0	0	0	0	0	0	0	0	0	0	0	0	0	0	0	0	0	0	0	0	0	0	0	0	0	0	0	0	0	0	0
1974	Tricyclodehydroisohumulone	C=C(C)C1CC23C(=O)C(C(=O)CC(C)C)C(=O)C2(O)C(=O)CC3C1(C)C	0	0	0	0	0	0	0	0	0	0	0	0	0	0	0	0	0	0	0	0	0	0	0	0	0	0	0	0	0	0	0	0	0	0	0	0	0	0	0	0	0	0	0	0	0	0	0
1975	Euglobal III	CC1=CC2C(CCC3(C)Oc4c(C=O)c(O)c(C=O)c(O)c4C(CC(C)C)C3CC1)C2(C)C	0	0	0	0	0	0	0	0	0	0	0	0	0	0	0	0	0	0	0	0	0	0	0	0	0	0	0	0	0	0	0	0	0	0	0	0	0	0	0	0	0	0	0	0	0	0	0
1976	L-Cystathionine	NC(CCSCC(N)C(=O)O)C(=O)O	0	0	0	0	0	0	0	0	0	0	0	0	0	0	0	0	0	0	0	0	0	0	0	0	0	0	0	0	0	0	0	0	0	0	0	0	0	0	0	0	0	0	0	0	0	0	0
1977	Xanthine	O=c1[nH]c(=O)c2[nH]cnc2[nH]1.O=c1[nH]c(=O)c2nc[nH]c2[nH]1.O=c1nc(O)c2nc[nH]c2[nH]1	0	0	0	0	0	0	0	0	0	0	0	0	0	0	0	0	0	0	0	0	0	0	0	0	0	0	0	0	0	0	0	0	0	0	0	0	0	0	0	0	0	0	0	0	0	0	0
1978	7-Methylxanthine	Cn1cnc2[nH]c(=O)[nH]c(=O)c21	0	0	0	0	0	0	0	0	0	0	0	0	0	0	0	0	0	0	0	0	0	0	0	0	0	0	0	0	0	0	0	0	0	0	0	0	0	0	0	0	0	0	0	0	0	0	0
1979	Cytarabine	N=c1ccn(C2OC(CO)C(O)C2O)c(O)n1	0	0	0	0	0	0	0	0	0	0	0	0	0	0	0	0	0	0	0	0	0	0	0	0	0	0	0	0	0	0	0	0	0	0	0	0	0	0	0	0	0	0	0	0	0	0	0
1980	D-Gluconic acid	O=C(O)C(O)C(O)C(O)C(O)CO	0	0	0	0	0	0	0	0	0	0	0	0	0	0	0	0	0	0	0	0	0	0	0	0	0	0	0	0	0	0	0	0	0	0	0	0	0	0	0	0	0	0	0	0	0	0	0
1981	Calcium gluconate	O=C([O-])C(O)C(O)C(O)C(O)CO.O=C([O-])C(O)C(O)C(O)C(O)CO.[Ca+2]	0	0	0	0	0	0	0	0	0	0	0	0	0	0	0	0	0	0	0	0	0	0	0	0	0	0	0	0	0	0	0	0	0	0	0	0	0	0	0	0	0	0	0	0	0	0	0
1982	D-Mannitol	OCC(O)C(O)C(O)C(O)CO	0	0	0	0	0	0	0	0	0	0	0	0	0	0	0	0	0	0	0	0	0	0	0	0	0	0	0	0	0	0	0	0	0	0	0	0	0	0	0	0	0	0	0	0	0	0	0
1983	Taxifolin 3-xyloside	O=C1c2c(O)cc(O)cc2OC(c2ccc(O)c(O)c2)C1OC1OCC(O)C(O)C1O	0	0	0	0	0	0	0	0	0	0	0	0	0	0	0	0	0	0	0	0	0	0	0	0	0	0	0	0	0	0	0	0	0	0	0	0	0	0	0	0	0	0	0	0	0	0	0
1984	Riboflavine 5'-(dihydrogen phosphate)	Cc1cc2nc3c(=O)[nH]c(=O)nc-3n(CC(O)C(O)C(O)COP(=O)(O)O)c2cc1C	0	0	0	0	0	0	0	0	0	0	0	0	0	0	0	0	0	0	0	0	0	0	0	0	0	0	0	0	0	0	0	0	0	0	0	0	0	0	0	0	0	0	0	0	0	0	0
1985	Papaverrubine B	COc1cc2c(cc1OC)C1OC(OC)c3c(ccc4c3OCO4)C1NCC2	0	0	0	0	0	0	0	0	0	0	0	0	0	0	0	0	0	0	0	0	0	0	0	0	0	0	0	0	0	0	0	0	0	0	0	0	0	0	0	0	0	0	0	0	0	0	0
1986	Glaudine	COc1cc2c(cc1OC)C1OC(OC)c3c(ccc4c3OCO4)C1N(C)CC2	0	0	0	0	0	0	0	0	0	0	0	0	0	0	0	0	0	0	0	0	0	0	0	0	0	0	0	0	0	0	0	0	0	0	0	0	0	0	0	0	0	0	0	0	0	0	0
1987	N-Methyl-14-O-demethylepiporphyroxine	COc1cc2c(cc1O)C1OC(O)c3c(ccc4c3OCO4)C1N(C)CC2	0	0	0	0	0	0	0	0	0	0	0	0	0	0	0	0	0	0	0	0	0	0	0	0	0	0	0	0	0	0	0	0	0	0	0	0	0	0	0	0	0	0	0	0	0	0	0
1988	Oxyacanthine	COc1cc2c3cc1Oc1c(OC)c(OC)cc4c1C(Cc1ccc(cc1)Oc1cc(ccc1O)CC3N(C)CC2)N(C)CC4	0	0	0	0	0	0	0	0	0	0	0	0	0	0	0	0	0	0	0	0	0	0	0	0	0	0	0	0	0	0	0	0	0	0	0	0	0	0	0	0	0	0	0	0	0	0	0
1989	Surugatoxin	CC1(O)C(=O)N2C3C(O)=NC(O)=NC3=NCC2(O)C(C(=O)OC2C(O)C(O)C(O)C(O)C2O)C12C(O)=Nc1cc(Br)ccc12	0	0	0	0	0	0	0	0	0	0	0	0	0	0	0	0	0	0	0	0	0	0	0	0	0	0	0	0	0	0	0	0	0	0	0	0	0	0	0	0	0	0	0	0	0	0	0
1990	Isotetrandrine	COc1ccc2cc1Oc1ccc(cc1)CC1c3cc(c(OC)cc3CCN1C)Oc1c(OC)c(OC)cc3c1C(C2)N(C)CC3	0	0	0	0	0	0	0	0	0	0	0	0	0	0	0	0	0	0	0	0	0	0	0	0	0	0	0	0	0	0	0	0	0	0	0	0	0	0	0	0	0	0	0	0	0	0	0
1991	Venoterpine	CC1c2cnccc2CC1O	0	0	0	0	0	0	0	0	0	0	0	0	0	0	0	0	0	0	0	0	0	0	0	0	0	0	0	0	0	0	0	0	0	0	0	0	0	0	0	0	0	0	0	0	0	0	0
1992	Norsanguinarine	c1cc2c(cnc3c4cc5c(cc4ccc23)OCO5)c2c1OCO2	0	0	0	0	0	0	0	0	0	0	0	0	0	0	0	0	0	0	0	0	0	0	0	0	0	0	0	0	0	0	0	0	0	0	0	0	0	0	0	0	0	0	0	0	0	0	0
1993	Arborinine	COc1cc2c(c(O)c1OC)c(=O)c1ccccc1n2C	0	0	0	0	0	0	0	0	0	0	0	0	0	0	0	0	0	0	0	0	0	0	0	0	0	0	0	0	0	0	0	0	0	0	0	0	0	0	0	0	0	0	0	0	0	0	0
1994	(S)-Edulinine	COc1c(CC(O)C(C)(C)O)c(=O)n(C)c2ccccc12	0	0	0	0	0	0	0	0	0	0	0	0	0	0	0	0	0	0	0	0	0	0	0	0	0	0	0	0	0	0	0	0	0	0	0	0	0	0	0	0	0	0	0	0	0	0	0
1995	Edulitine	COc1cc(=O)[nH]c2c(OC)cccc12	0	0	0	0	0	0	0	0	0	0	0	0	0	0	0	0	0	0	0	0	0	0	0	0	0	0	0	0	0	0	0	0	0	0	0	0	0	0	0	0	0	0	0	0	0	0	0
1996	Crustecdysone	CC(C)(O)CCC(O)C(C)(O)C1CCC2(O)C3=CC(=O)C4CC(O)C(O)CC4(C)C3CCC12C	0	0	0	0	0	0	0	0	0	0	0	0	0	0	0	0	0	0	0	0	0	0	0	0	0	0	0	0	0	0	0	0	0	0	0	0	0	0	0	0	0	0	0	0	0	0	0
1997	Erythratine	COC1CC23C(=CC1O)CCN2CCc1cc2c(cc13)OCO2	0	0	0	0	0	0	0	0	0	0	0	0	0	0	0	0	0	0	0	0	0	0	0	0	0	0	0	0	0	0	0	0	0	0	0	0	0	0	0	0	0	0	0	0	0	0	0
1998	Eupolauridine	c1ccc2c(c1)-c1nccc3ccnc-2c13	0	0	0	0	0	0	0	0	0	0	0	0	0	0	0	0	0	0	0	0	0	0	0	0	0	0	0	0	0	0	0	0	0	0	0	0	0	0	0	0	0	0	0	0	0	0	0
1999	Murrayazolinine	Cc1cc2c([nH]c3ccccc32)c2c1OC1(C)CCC(C(C)(C)O)C2C1	0	0	0	0	0	0	0	0	0	0	0	0	0	0	0	0	0	0	0	0	0	0	0	0	0	0	0	0	0	0	0	0	0	0	0	0	0	0	0	0	0	0	0	0	0	0	0
2000	(S)-Isocorydine	COc1ccc2c(c1O)-c1c(OC)c(OC)cc3c1C(C2)N(C)CC3	0	0	0	0	0	0	0	0	0	0	0	0	0	0	0	0	0	0	0	0	0	0	0	0	0	0	0	0	0	0	0	0	0	0	0	0	0	0	0	0	0	0	0	0	0	0	0
2001	Piperolein A	O=C(CCCCC=Cc1ccc2c(c1)OCO2)N1CCCCC1	0	0	0	0	0	0	0	0	0	0	0	0	0	0	0	0	0	0	0	0	0	0	0	0	0	0	0	0	0	0	0	0	0	0	0	0	0	0	0	0	0	0	0	0	0	0	0
2002	(E)-Piperolein A	O=C(CCCCC=Cc1ccc2c(c1)OCO2)N1CCCCC1	0	0	0	0	0	0	0	0	0	0	0	0	0	0	0	0	0	0	0	0	0	0	0	0	0	0	0	0	0	0	0	0	0	0	0	0	0	0	0	0	0	0	0	0	0	0	0
2003	(E,E,E)-Sylvatine	CC(C)CCCC=CCCCCN=C(O)C=CC=Cc1ccc2c(c1)OCO2	0	0	0	0	0	0	0	0	0	0	0	0	0	0	0	0	0	0	0	0	0	0	0	0	0	0	0	0	0	0	0	0	0	0	0	0	0	0	0	0	0	0	0	0	0	0	0
2004	Piperlongine	COc1cc(C=CC(=O)N2CCC=CC2=O)cc(OC)c1OC	0	0	0	0	0	0	0	0	0	0	0	0	0	0	0	0	0	0	0	0	0	0	0	0	0	0	0	0	0	0	0	0	0	0	0	0	0	0	0	0	0	0	0	0	0	0	0
2005	(E,E)-Piperlonguminine	CC(C)CN=C(O)C=CC=Cc1ccc2c(c1)OCO2	0	0	0	0	0	0	0	0	0	0	0	0	0	0	0	0	0	0	0	0	0	0	0	0	0	0	0	0	0	0	0	0	0	0	0	0	0	0	0	0	0	0	0	0	0	0	0
2006	N-Isobutyl-2,4,8-decatrienamide	CC=CCCC=CC=CC(O)=NCC(C)C	0	0	0	0	0	0	0	0	0	0	0	0	0	0	0	0	0	0	0	0	0	0	0	0	0	0	0	0	0	0	0	0	0	0	0	0	0	0	0	0	0	0	0	0	0	0	0
2007	Isogravacridonechlorine	Cn1c2ccccc2c(=O)c2c(O)cc3c(c21)CC(C(C)(O)CCl)O3	1	0	0	0	0	0	0	0	0	0	0	0	0	0	0	0	0	0	0	0	0	0	0	0	0	0	0	0	0	0	0	0	0	0	0	0	0	0	0	0	0	0	0	0	0	0	0
2008	(E,E)-Lansamide I	CN(C=Cc1ccccc1)C(=O)C=Cc1ccccc1	0	0	0	0	0	0	0	0	0	0	0	0	0	0	0	0	0	0	0	0	0	0	0	0	0	0	0	0	0	0	0	0	0	0	0	0	0	0	0	0	0	0	0	0	0	0	0
2009	N-[2-Hydroxy-2-(4-hydroxyphenyl)ethyl]cinnamide	OC(C=Cc1ccccc1)=NCC(O)c1ccc(O)cc1	0	0	0	0	0	0	0	0	0	0	0	0	0	0	0	0	0	0	0	0	0	0	0	0	0	0	0	0	0	0	0	0	0	0	0	0	0	0	0	0	0	0	0	0	0	0	0
2010	Marmeline	CC(C)=CCOc1ccc(C(O)CN=C(O)C=Cc2ccccc2)cc1	0	0	0	0	0	0	0	0	0	0	0	0	0	0	0	0	0	0	0	0	0	0	0	0	0	0	0	0	0	0	0	0	0	0	0	0	0	0	0	0	0	0	0	0	0	0	0
2011	N-2-[4-(3,3-Dimethylallyloxy)phenyl]ethylcinnamide	CC(C)=CCOc1ccc(CCN=C(O)C=Cc2ccccc2)cc1	0	0	0	0	0	0	0	0	0	0	0	0	0	0	0	0	0	0	0	0	0	0	0	0	0	0	0	0	0	0	0	0	0	0	0	0	0	0	0	0	0	0	0	0	0	0	0
2012	(E,E)-N-4-Methoxystyrylcinnamide	COc1ccc(C=CN=C(O)C=Cc2ccccc2)cc1	0	0	0	0	0	0	0	0	0	0	0	0	0	0	0	0	0	0	0	0	0	0	0	0	0	0	0	0	0	0	0	0	0	0	0	0	0	0	0	0	0	0	0	0	0	0	0
2013	gamma-Fagarine	COc1c2ccoc2nc2c(OC)cccc12	0	0	0	0	0	0	0	0	0	0	0	0	0	0	0	0	0	0	0	0	0	0	0	0	0	0	0	0	0	0	0	0	0	0	0	0	0	0	0	0	0	0	0	0	0	0	0
2014	Fagopyrine	Cc1cc(O)c2c(=O)c3c(O)c(C4CCCCN4)c(O)c4c5c(O)c(C6CCCCN6)c(O)c6c(=O)c7c(O)cc(C)c8c1c2c(c34)c(c78)c65	0	0	0	0	0	0	0	0	0	0	0	0	0	0	0	0	0	0	0	0	0	0	0	0	0	0	0	0	0	0	0	0	0	0	0	0	0	0	0	0	0	0	0	0	0	0	0
2015	(Z)-3-Oxo-2-(2-pentenyl)-1-cyclopenteneacetic acid	CCC=CCC1=C(CC(=O)O)CCC1=O	0	0	0	0	0	0	0	0	0	0	0	0	0	0	0	0	0	0	0	0	0	0	0	0	0	0	0	0	0	0	0	0	0	0	0	0	0	0	0	0	0	0	0	0	0	0	0
2016	(-)-Folicanthine	CN1CCC2(C34CCN(C)C3N(C)c3ccccc34)c3ccccc3N(C)C12	0	0	0	0	0	0	0	0	0	0	0	0	0	0	0	0	0	0	0	0	0	0	0	0	0	0	0	0	0	0	0	0	0	0	0	0	0	0	0	0	0	0	0	0	0	0	0
2017	Frangulanine	CCC(C)C(C(O)=NC1C(O)=NC(CC(C)C)C(O)=NC=Cc2ccc(cc2)OC1C(C)C)N(C)C	0	0	0	0	0	0	0	0	0	0	0	0	0	0	0	0	0	0	0	0	0	0	0	0	0	0	0	0	0	0	0	0	0	0	0	0	0	0	0	0	0	0	0	0	0	0	0
2018	Hovenine A	CCC(C)C(NC)C(O)=NC1C(O)=NC(CC(C)C)C(O)=NC=Cc2ccc(cc2)OC1C(C)C	0	0	0	0	0	0	0	0	0	0	0	0	0	0	0	0	0	0	0	0	0	0	0	0	0	0	0	0	0	0	0	0	0	0	0	0	0	0	0	0	0	0	0	0	0	0	0
2019	(-)-Fumigaclavine B	CC1CN(C)C2Cc3c[nH]c4cccc(c34)C2C1O	0	0	0	0	0	0	0	0	0	0	0	0	0	0	0	0	0	0	0	0	0	0	0	0	0	0	0	0	0	0	0	0	0	0	0	0	0	0	0	0	0	0	0	0	0	0	0
2020	Fumigaclavine A	CC(=O)OC1C(C)CN(C)C2Cc3c[nH]c4cccc(c34)C12	0	0	0	0	0	0	0	0	0	0	0	0	0	0	0	0	0	0	0	0	0	0	0	0	0	0	0	0	0	0	0	0	0	0	0	0	0	0	0	0	0	0	0	0	0	0	0
2021	Fumitremorgin B	COc1ccc2c3c(n(CC=C(C)C)c2c1)C(C=C(C)C)N1C(=O)C2CCCN2C(=O)C1(O)C3O	0	0	0	0	0	0	0	0	0	0	0	0	0	0	0	0	0	0	0	0	0	0	0	0	0	0	0	0	0	0	0	0	0	0	0	0	0	0	0	0	0	0	0	0	0	0	0
2022	1-(2-Furanylmethyl)-1H-pyrrole	c1coc(Cn2cccc2)c1	0	0	0	0	0	0	0	0	0	0	0	0	0	0	0	0	0	0	0	0	0	0	0	0	0	0	0	0	0	0	0	0	0	0	0	0	0	0	0	0	0	0	0	0	0	0	0
2023	Jubanine A	CCC(C)C1NC(=O)C2C(CCN2C(=O)C(Cc2ccccc2)NC(=O)C(Cc2ccccc2)N(C)C)Oc2ccc(OC)c(c2)C=CNC1=O	0	0	0	0	0	0	0	0	0	0	0	0	0	0	0	0	0	0	0	0	0	0	0	0	0	0	0	0	0	0	0	0	0	0	0	0	0	0	0	0	0	0	0	0	0	0	0
2024	Jubanine B	COc1ccc2cc1C=CN=C(O)C(Cc1ccccc1)N=C(O)C1C(CCN1C(=O)C(Cc1ccccc1)N=C(O)C(Cc1ccccc1)N(C)C)O2	0	0	0	0	0	0	0	0	0	0	0	0	0	0	0	0	0	0	0	0	0	0	0	0	0	0	0	0	0	0	0	0	0	0	0	0	0	0	0	0	0	0	0	0	0	0	0
2025	Koenigine	COc1cc2c(cc1O)[nH]c1c3c(c(C)cc12)OC(C)(C)C=C3	0	0	0	0	0	0	0	0	0	0	0	0	0	0	0	0	0	0	0	0	0	0	0	0	0	0	0	0	0	0	0	0	0	0	0	0	0	0	0	0	0	0	0	0	0	0	0
2026	Koenigicine	COc1cc2[nH]c3c4c(c(C)cc3c2cc1OC)OC(C)(C)C=C4	0	0	0	0	0	0	0	0	0	0	0	0	0	0	0	0	0	0	0	0	0	0	0	0	0	0	0	0	0	0	0	0	0	0	0	0	0	0	0	0	0	0	0	0	0	0	0
2027	Koenine	Cc1cc2c([nH]c3ccc(O)cc32)c2c1OC(C)(C)C=C2	0	0	0	0	0	0	0	0	0	0	0	0	0	0	0	0	0	0	0	0	0	0	0	0	0	0	0	0	0	0	0	0	0	0	0	0	0	0	0	0	0	0	0	0	0	0	0
2028	Koenimbine	COc1ccc2[nH]c3c4c(c(C)cc3c2c1)OC(C)(C)C=C4	0	0	0	0	0	0	0	0	0	0	0	0	0	0	0	0	0	0	0	0	0	0	0	0	0	0	0	0	0	0	0	0	0	0	0	0	0	0	0	0	0	0	0	0	0	0	0
2029	(R)-Laudanidine	COc1ccc(CC2c3cc(OC)c(OC)cc3CCN2C)cc1O	0	0	0	0	0	0	0	0	0	0	0	0	0	0	0	0	0	0	0	0	0	0	0	0	0	0	0	0	0	0	0	0	0	0	0	0	0	0	0	0	0	0	0	0	0	0	0
2030	Laudanine	COc1ccc(CC2c3cc(OC)c(OC)cc3CCN2C)cc1O	0	0	0	0	0	0	0	0	0	0	0	0	0	0	0	0	0	0	0	0	0	0	0	0	0	0	0	0	0	0	0	0	0	0	0	0	0	0	0	0	0	0	0	0	0	0	0
2031	Mukonicine	COc1cc(OC)c2[nH]c3c4c(c(C)cc3c2c1)OC(C)(C)C=C4	0	0	0	0	0	0	0	0	0	0	0	0	0	0	0	0	0	0	0	0	0	0	0	0	0	0	0	0	0	0	0	0	0	0	0	0	0	0	0	0	0	0	0	0	0	0	0
2032	(S)-Laudanosine	COc1ccc(CC2c3cc(OC)c(OC)cc3CCN2C)cc1OC	0	0	0	0	0	0	0	0	0	0	0	0	0	0	0	0	0	0	0	0	0	0	0	0	0	0	0	0	0	0	0	0	0	0	0	0	0	0	0	0	0	0	0	0	0	0	0
2033	Mukonidine	COC(=O)c1cc2c(cc1O)[nH]c1ccccc12	0	0	0	0	0	0	0	0	0	0	0	0	0	0	0	0	0	0	0	0	0	0	0	0	0	0	0	0	0	0	0	0	0	0	0	0	0	0	0	0	0	0	0	0	0	0	0
2034	Clausine L	COC(=O)c1cc2c(cc1OC)[nH]c1ccccc12	0	0	0	0	0	0	0	0	0	0	0	0	0	0	0	0	0	0	0	0	0	0	0	0	0	0	0	0	0	0	0	0	0	0	0	0	0	0	0	0	0	0	0	0	0	0	0
2035	Mukonal	O=Cc1cc2c(cc1O)[nH]c1ccccc12	0	0	0	0	0	0	0	0	0	0	0	0	0	0	0	0	0	0	0	0	0	0	0	0	0	0	0	0	0	0	0	0	0	0	0	0	0	0	0	0	0	0	0	0	0	0	0
2036	Launobine	COc1ccc2c(c1O)-c1c3c(cc4c1C(C2)NCC4)OCO3	0	0	0	0	0	0	0	0	0	0	0	0	0	0	0	0	0	0	0	0	0	0	0	0	0	0	0	0	0	0	0	0	0	0	0	0	0	0	0	0	0	0	0	0	0	0	0
2037	Lansine	O=Cc1cc2c(cc1O)[nH]c1ccc(O)cc12	0	0	0	0	0	0	0	0	0	0	0	0	0	0	0	0	0	0	0	0	0	0	0	0	0	0	0	0	0	0	0	0	0	0	0	0	0	0	0	0	0	0	0	0	0	0	0
2038	Heptaphylline	CC(C)=CCc1c(O)c(C=O)cc2c1[nH]c1ccccc12	0	0	0	0	0	0	0	0	0	0	0	0	0	0	0	0	0	0	0	0	0	0	0	0	0	0	0	0	0	0	0	0	0	0	0	0	0	0	0	0	0	0	0	0	0	0	0
2039	Laurotetanine	COc1cc2c(cc1O)CC1NCCc3cc(OC)c(OC)c-2c31	0	0	0	0	0	0	0	0	0	0	0	0	0	0	0	0	0	0	0	0	0	0	0	0	0	0	0	0	0	0	0	0	0	0	0	0	0	0	0	0	0	0	0	0	0	0	0
2040	Bicyclomahanimbicine	Cc1ccc2[nH]c3c4c(ccc3c2c1)OC1(C)CCC2C1C4C2(C)C	0	0	0	0	0	0	0	0	0	0	0	0	0	0	0	0	0	0	0	0	0	0	0	0	0	0	0	0	0	0	0	0	0	0	0	0	0	0	0	0	0	0	0	0	0	0	0
2041	Bicyclomahanimbine	Cc1cc2c([nH]c3ccccc32)c2c1OC1(C)CCC3C1C2C3(C)C	0	0	0	0	0	0	0	0	0	0	0	0	0	0	0	0	0	0	0	0	0	0	0	0	0	0	0	0	0	0	0	0	0	0	0	0	0	0	0	0	0	0	0	0	0	0	0
2042	(Ã¥Â±)-Currayangine	Cc1cc2c3ccccc3n3c2c2c1OC1(C)CCC(C2C1)C3(C)C	0	0	0	0	0	0	0	0	0	0	0	0	0	0	0	0	0	0	0	0	0	0	0	0	0	0	0	0	0	0	0	0	0	0	0	0	0	0	0	0	0	0	0	0	0	0	0
2043	Murrayacinine	CC(C)=CCCC1(C)C=Cc2c(c(C=O)cc3c2[nH]c2ccccc23)O1	0	0	0	0	0	0	0	0	0	0	0	0	0	0	0	0	0	0	0	0	0	0	0	0	0	0	0	0	0	0	0	0	0	0	0	0	0	0	0	0	0	0	0	0	0	0	0
2044	(+)-Mahanimbicine	CC(C)=CCCC1(C)C=Cc2c(ccc3c2[nH]c2ccc(C)cc23)O1	0	0	0	0	0	0	0	0	0	0	0	0	0	0	0	0	0	0	0	0	0	0	0	0	0	0	0	0	0	0	0	0	0	0	0	0	0	0	0	0	0	0	0	0	0	0	0
2045	Mahanimbinine	Cc1cc2c([nH]c3ccccc32)c2c1OC(C)(CCCC(C)(C)O)C=C2	0	0	0	0	0	0	0	0	0	0	0	0	0	0	0	0	0	0	0	0	0	0	0	0	0	0	0	0	0	0	0	0	0	0	0	0	0	0	0	0	0	0	0	0	0	0	0
2046	5-Methoxycanthin-6-one	COc1cc2nccc3c4ccccc4n(c1=O)c23	0	0	0	0	0	0	0	0	0	0	0	0	0	0	0	0	0	0	0	0	0	0	0	0	0	0	0	0	0	0	0	0	0	0	0	0	0	0	0	0	0	0	0	0	0	0	0
2047	Nigakinone	O=c1c(O)c(O)c2nccc3c4ccccc4n1c23	0	0	0	0	0	0	0	0	0	0	0	0	0	0	0	0	0	0	0	0	0	0	0	0	0	0	0	0	0	0	0	0	0	0	0	0	0	0	0	0	0	0	0	0	0	0	0
2048	Lagerstroemine	COc1ccc2c(c1OC)-c1cc(ccc1O)CCC(=O)OC1CC3CCCCN3C2C1	0	0	0	0	0	0	0	0	0	0	0	0	0	0	0	0	0	0	0	0	0	0	0	0	0	0	0	0	0	0	0	0	0	0	0	0	0	0	0	0	0	0	0	0	0	0	0
2049	2'-(E)-Feruloyl-3-(arabinosylxylose)	COc1cc(C=CC(=O)OC2C(OC3C(O)COC(O)C3O)OC(CO)C2O)ccc1O	0	0	0	0	0	0	0	0	0	0	0	0	0	0	0	0	0	0	0	0	0	0	0	0	0	0	0	0	0	0	0	0	0	0	0	0	0	0	0	0	0	0	0	0	0	0	0
2050	5'-(E)-Feruloyl)-3-(2'-methylarabinosylxylose)	COc1cc(C=CC(=O)OCC2OC(OC3C(O)COC(O)C3O)C(OC)C2O)ccc1O	0	0	0	0	0	0	0	0	0	0	0	0	0	0	0	0	0	0	0	0	0	0	0	0	0	0	0	0	0	0	0	0	0	0	0	0	0	0	0	0	0	0	0	0	0	0	0
2051	5'-((Z)-Feruloyl) 3-(2'-methylarabinosylxylose)	COc1cc(C=CC(=O)OCC2OC(OC3C(O)COC(O)C3O)C(OC)C2O)ccc1O	0	0	0	0	0	0	0	0	0	0	0	0	0	0	0	0	0	0	0	0	0	0	0	0	0	0	0	0	0	0	0	0	0	0	0	0	0	0	0	0	0	0	0	0	0	0	0
2052	(2R,6S,7S,10Z)-beta-Santala-3(15),10-dien-12-ol	C=C1C2CCC(C2)C1(C)CCC=C(C)CO	0	0	0	0	0	0	0	0	0	0	0	0	0	0	0	0	0	0	0	0	0	0	0	0	0	0	0	0	0	0	0	0	0	0	0	0	0	0	0	0	0	0	0	0	0	0	0
2053	Epi-beta-santalol	C=C1C2CCC(C2)C1(C)CCC=C(C)CO	0	0	0	0	0	0	0	0	0	0	0	0	0	0	0	0	0	0	0	0	0	0	0	0	0	0	0	0	0	0	0	0	0	0	0	0	0	0	0	0	0	0	0	0	0	0	0
2054	Neotigogenin 3-[4''-glucosyl-6''-arabinosylglucoside]	CC1CCC2(OC1)OC1CC3C4CCC5CC(OC6OC(COC7OCC(O)C(O)C7O)C(OC7OC(CO)C(O)C(O)C7O)C(O)C6O)CCC5(C)C4CCC3(C)C1C2C	0	0	0	0	0	0	0	0	0	0	0	0	0	0	0	0	0	0	0	0	0	0	0	0	0	0	0	0	0	0	0	0	0	0	0	0	0	0	0	0	0	0	0	0	0	0	0
2055	Sarsasapogenin 3-[4''-glucosyl-6''-arabinosylglucoside]	CC1CCC2(OC1)OC1CC3C4CCC5CC(OC6OC(COC7OCC(O)C(O)C7O)C(OC7OC(CO)C(O)C(O)C7O)C(O)C6O)CCC5(C)C4CCC3(C)C1C2C	0	0	0	0	0	0	0	0	0	0	0	0	0	0	0	0	0	0	0	0	0	0	0	0	0	0	0	0	0	0	0	0	0	0	0	0	0	0	0	0	0	0	0	0	0	0	0
2056	Xanthohumol C	COc1cc2c(c(O)c1C(=O)C=Cc1ccc(O)cc1)C=CC(C)(C)O2	0	0	0	0	0	0	0	0	0	0	0	0	0	0	0	0	0	0	0	0	0	0	0	0	0	0	0	0	0	0	0	0	0	0	0	0	0	0	0	0	0	0	0	0	0	0	0
2057	eq-4''-Hydroxymaysin	CC1OC(OC2C(c3c(O)cc4oc(-c5ccc(O)c(O)c5)cc(=O)c4c3O)OC(C)C(O)C2O)C(O)C(O)C1O	0	0	0	0	0	0	0	0	0	0	0	0	0	0	0	0	0	0	0	0	0	0	0	0	0	0	0	0	0	0	0	0	0	0	0	0	0	0	0	0	0	0	0	0	0	0	0
2058	ax-4''-Hydroxymaysin	CC1OC(OC2C(c3c(O)cc4oc(-c5ccc(O)c(O)c5)cc(=O)c4c3O)OC(C)C(O)C2O)C(O)C(O)C1O	0	0	0	0	0	0	0	0	0	0	0	0	0	0	0	0	0	0	0	0	0	0	0	0	0	0	0	0	0	0	0	0	0	0	0	0	0	0	0	0	0	0	0	0	0	0	0
2059	Syzyginin A	O=C(OC1OC2COC(=O)c3cc(O)c(Oc4c(C(=O)O)cc(O)c(O)c4O)c(O)c3-c3c(cc(O)c(O)c3O)C(=O)OC2C(OC(=O)c2cc(O)c(O)c(O)c2)C1OC(=O)c1cc(O)c(O)c(O)c1)c1cc(O)c(O)c(O)c1	0	0	0	0	0	0	0	0	0	0	0	0	0	0	0	0	0	0	0	0	0	0	0	0	0	0	0	0	0	0	0	0	0	0	0	0	0	1	0	0	0	0	0	0	0	0	0
2060	Syzyginin B	O=C(OC1C(O)C(O)OC2COC(=O)c3cc(O)c4c(c3-c3c(cc(O)c(O)c3O)C(=O)OC21)Oc1cc(O)c(O)c(O)c1O4)c1cc(O)c(O)c(O)c1	0	0	0	0	0	0	0	0	0	0	0	0	0	0	0	0	0	0	0	0	0	0	0	0	0	0	0	0	0	0	0	0	0	0	0	0	0	1	0	0	0	0	0	0	0	0	0
2061	ax-4''-Hydroxy-3-'-methoxymaysin	COc1cc(-c2cc(=O)c3c(O)c(C4OC(C)C(O)C(O)C4OC4OC(C)C(O)C(O)C4O)c(O)cc3o2)ccc1O	0	0	0	0	0	0	0	0	0	0	0	0	0	0	0	0	0	0	0	0	0	0	0	0	0	0	0	0	0	0	0	0	0	0	0	0	0	0	0	0	0	0	0	0	0	0	0
2062	6''-Caffeoylastragalin	O=C(C=Cc1ccc(O)c(O)c1)OCC1OC(Oc2c(-c3ccc(O)cc3)oc3cc(O)cc(O)c3c2=O)C(O)C(O)C1O	0	0	0	0	0	0	0	0	0	0	0	0	0	0	0	0	0	0	0	0	0	0	0	0	0	0	0	0	0	0	0	0	0	0	0	0	0	0	0	0	0	0	0	0	0	0	0
2063	Piperundecalidine	O=C(C=CC=CCCCCC=Cc1ccc2c(c1)OCO2)N1CCCCC1	0	0	0	0	0	0	0	0	0	0	0	0	0	0	0	0	0	0	0	0	0	0	0	0	0	0	0	0	0	0	0	0	0	0	0	0	0	0	0	0	0	0	0	0	0	0	0
2064	Girinimbine	Cc1cc2c([nH]c3ccccc32)c2c1OC(C)(C)C=C2	0	0	0	0	0	0	0	0	0	0	0	0	0	0	0	0	0	0	0	0	0	0	0	0	0	0	0	0	0	0	0	0	0	0	0	0	0	0	0	0	0	0	0	0	0	0	0
2065	(E)-Herclavine	COc1ccc(CCN(C)C(=O)C=Cc2ccccc2)cc1	0	0	0	0	0	0	0	0	0	0	0	0	0	0	0	0	0	0	0	0	0	0	0	0	0	0	0	0	0	0	0	0	0	0	0	0	0	0	0	0	0	0	0	0	0	0	0
2066	Glucobrassicin	O=S(=O)(O)ON=C(Cc1c[nH]c2ccccc12)SC1OC(CO)C(O)C(O)C1O	0	0	0	0	0	0	0	0	0	0	0	0	0	0	0	0	0	0	0	0	0	0	0	0	0	0	0	0	0	0	0	0	0	0	0	0	0	0	0	0	0	0	0	0	0	0	0
2067	Graveolinine	COc1cc(-c2ccc3c(c2)OCO3)nc2ccccc12	0	0	0	0	0	0	0	0	0	0	0	0	0	0	0	0	0	0	0	0	0	0	0	0	0	0	0	0	0	0	0	0	0	0	0	0	0	0	0	0	0	0	0	0	0	0	0
2068	Nornantenine	COc1cc2c3c(c1OC)-c1cc4c(cc1CC3NCC2)OCO4	0	0	0	0	0	0	0	0	0	0	0	0	0	0	0	0	0	0	0	0	0	0	0	0	0	0	0	0	0	0	0	0	0	0	0	0	0	0	0	0	0	0	0	0	0	0	0
2069	Narceine	COc1ccc(C(=O)Cc2c(CCN(C)C)cc3c(c2OC)OCO3)c(C(=O)O)c1OC	0	0	0	0	0	0	0	0	0	0	0	0	0	0	0	0	0	0	0	0	0	0	0	0	0	0	0	0	0	0	0	0	0	0	0	0	0	0	0	0	0	0	0	0	0	0	0
2070	Oxynarcotine	CNCCc1cc2c(c(OC)c1CC(=O)c1ccc(OC)c(OC)c1C(=O)O)OCO2	0	0	0	0	0	0	0	0	0	0	0	0	0	0	0	0	0	0	0	0	0	0	0	0	0	0	0	0	0	0	0	0	0	0	0	0	0	0	0	0	0	0	0	0	0	0	0
2071	Neopine	COc1ccc2c3c1OC1C(O)CC=C4C(C2)N(C)CCC431	0	0	0	0	0	0	0	0	0	0	0	0	0	0	0	0	0	0	0	0	0	0	0	0	0	0	0	0	0	0	0	0	0	0	0	0	0	0	0	0	0	0	0	0	0	0	0
2072	(S)-Norisocorydine	COc1ccc2c(c1O)-c1c(OC)c(OC)cc3c1C(C2)NCC3	0	0	0	0	0	0	0	0	0	0	0	0	0	0	0	0	0	0	0	0	0	0	0	0	0	0	0	0	0	0	0	0	0	0	0	0	0	0	0	0	0	0	0	0	0	0	0
2073	(-)-Norushinsunine	OC1c2ccccc2-c2c3c(cc4c2C1NCC4)OCO3	0	0	0	0	0	0	0	0	0	0	0	0	0	0	0	0	0	0	0	0	0	0	0	0	0	0	0	0	0	0	0	0	0	0	0	0	0	0	0	0	0	0	0	0	0	0	0
2074	Chikusetsusaponin VI	CC(C)=CCCC(C)(OC1OC(COC2OC(CO)C(O)C(O)C2O)C(O)C(O)C1O)C1CCC2(C)C1C(O)CC1C3(C)CCC(OC4OC(COC5OCC(O)C(O)C5O)C(O)C(O)C4OC4OC(CO)C(O)C(O)C4O)C(C)(C)C3CCC12C	0	0	0	0	0	0	0	0	0	0	0	0	0	0	0	0	0	0	0	0	0	0	0	0	0	0	0	0	0	0	0	0	0	0	0	0	0	0	0	0	0	0	0	0	0	0	0
2075	Oripavine	COC1=CC=C2C3Cc4ccc(O)c5c4C2(CCN3C)C1O5	0	0	0	0	0	0	0	0	0	0	0	0	0	0	0	0	0	0	0	0	0	0	0	0	0	0	0	0	0	0	0	0	0	0	0	0	0	0	0	0	0	0	0	0	0	0	0
2076	Limonene aldehyde	CC1=CCC(C(C)CC=O)CC1	0	0	0	0	0	0	0	0	0	0	0	0	0	0	0	0	0	0	0	0	0	0	0	0	0	0	0	0	0	0	0	0	0	0	0	0	0	0	0	0	0	0	0	0	0	0	0
2077	Notoginsenoside D	CC(C)=CCCC(C)(OC1OC(COC2OC(COC3OCC(O)C(O)C3O)C(O)C(O)C2O)C(O)C(O)C1O)C1CCC2(C)C1C(O)CC1C3(C)CCC(OC4OC(CO)C(O)C(O)C4OC4OC(CO)C(O)C(O)C4OC4OCC(O)C(O)C4O)C(C)(C)C3CCC12C	0	0	0	0	0	0	0	0	0	0	0	0	0	0	0	0	0	0	0	0	0	0	0	0	0	0	0	0	0	0	0	0	0	0	0	0	0	0	0	0	0	0	0	0	0	0	0
2078	3-(3,4,5-Trimethoxyphenyl)propanoic acid	COc1cc(CCC(=O)O)cc(OC)c1OC	0	0	0	0	0	0	0	0	0	0	0	0	0	0	0	0	0	0	0	0	0	0	0	0	0	0	0	0	0	0	0	0	0	0	0	0	0	0	0	0	0	0	0	0	0	0	0
2079	Erysodine	COc1cc2c(cc1O)CCN1CC=C3C=CC(OC)CC321	0	0	0	0	0	0	0	0	0	0	0	0	0	0	0	0	0	0	0	0	0	0	0	0	0	0	0	0	0	0	0	0	0	0	0	0	0	0	0	0	0	0	0	0	0	0	0
2080	Erysopine	COC1C=CC2=CCN3CCc4cc(O)c(O)cc4C23C1	0	0	0	0	0	0	0	0	0	0	0	0	0	0	0	0	0	0	0	0	0	0	0	0	0	0	0	0	0	0	0	0	0	0	0	0	0	0	0	0	0	0	0	0	0	0	0
2081	Erysothiopine	COC1C=CC2=CCN3CCc4cc(OS(=O)(=O)CC(=O)O)c(O)cc4C23C1	0	0	0	0	0	0	0	0	0	0	0	0	0	0	0	0	0	0	0	0	0	0	0	0	0	0	0	0	0	0	0	0	0	0	0	0	0	0	0	0	0	0	0	0	0	0	0
2082	(+)-Erythraline	COC1C=CC2=CCN3CCc4cc5c(cc4C23C1)OCO5	0	0	0	0	0	0	0	0	0	0	0	0	0	0	0	0	0	0	0	0	0	0	0	0	0	0	0	0	0	0	0	0	0	0	0	0	0	0	0	0	0	0	0	0	0	0	0
2083	(+)-Erysotrine	COc1cc2c(cc1OC)C13CC(OC)C=CC1=CCN3CC2	0	0	0	0	0	0	0	0	0	0	0	0	0	0	0	0	0	0	0	0	0	0	0	0	0	0	0	0	0	0	0	0	0	0	0	0	0	0	0	0	0	0	0	0	0	0	0
2084	(-)-Quebrachamine	CCC12CCCN(CCc3c([nH]c4ccccc34)CC1)C2	0	0	0	0	0	0	0	0	0	0	0	0	0	0	0	0	0	0	0	0	0	0	0	0	0	0	0	0	0	0	0	0	0	0	0	0	0	0	0	0	0	0	0	0	0	0	0
2085	Quinine hydrochloride	C=CC1CN2CCC1CC2C(O)c1ccnc2ccc(OC)cc12.Cl	0	0	0	0	0	0	0	0	0	0	0	0	0	0	0	0	0	0	0	0	0	0	0	0	0	0	0	0	0	0	0	0	0	0	0	0	0	0	0	0	0	0	0	0	0	0	0
2086	Quinine sulfate	C=CC1CN2CCC1CC2C(O)c1ccnc2ccc(OC)cc12.C=CC1CN2CCC1CC2C(O)c1ccnc2ccc(OC)cc12.O=S(=O)(O)O	0	0	0	0	0	0	0	0	0	0	0	0	0	0	0	0	0	0	0	0	0	0	0	0	0	0	0	0	0	0	0	0	0	0	0	0	0	0	0	0	0	0	0	0	0	0	0
2087	Quinine	C=CC1CN2CCC1CC2C(O)c1ccnc2ccc(OC)cc12	0	0	0	0	0	0	0	0	0	0	0	0	0	0	0	0	0	0	0	0	0	0	0	0	0	0	0	0	0	0	0	0	0	0	0	0	0	0	0	0	0	0	0	0	0	0	0
2088	Isomurrayazoline	Cc1ccc2c(c1)c1ccc3c4c1n2C(C)(C)C1CCC(C)(CC41)O3	0	0	0	0	0	0	0	0	0	0	0	0	0	0	0	0	0	0	0	0	0	0	0	0	0	0	0	0	0	0	0	0	0	0	0	0	0	0	0	0	0	0	0	0	0	0	0
2089	(S)-Reticuline	COc1ccc(CC2c3cc(O)c(OC)cc3CCN2C)cc1O	0	0	0	0	0	0	0	0	0	0	0	0	0	0	0	0	0	0	0	0	0	0	0	0	0	0	0	0	0	0	0	0	0	0	0	0	0	0	0	0	0	0	0	0	0	0	0
2091	Rhazidigenine Nb-oxide	CCC12CCC[N+]([O-])(CCC3(O)C(=Nc4ccccc43)CC1)C2	0	0	0	0	0	0	0	0	0	0	0	0	0	0	0	0	0	0	0	0	0	0	0	0	0	0	0	0	0	0	0	0	0	0	0	0	0	0	0	0	0	0	0	0	0	0	0
2092	Rhoeagenine	CN1CCc2cc3c(cc2C2OC(O)c4c(ccc5c4OCO5)C21)OCO3	0	0	0	0	0	0	0	0	0	0	0	0	0	0	0	0	0	0	0	0	0	0	0	0	0	0	0	0	0	0	0	0	0	0	0	0	0	0	0	0	0	0	0	0	0	0	0
2093	(R)-Roemerine	CN1CCc2cc3c(c4c2C1Cc1ccccc1-4)OCO3	0	0	0	0	0	0	0	0	0	0	0	0	0	0	0	0	0	0	0	0	0	0	0	0	0	0	0	0	0	0	0	0	0	0	0	0	0	0	0	0	0	0	0	0	0	0	0
2094	2',2'-Dimethyl(pyrano-5',6':3:4)-1,5-dihydroxy-6-methoxy-10-methylacridone	COc1ccc2c(=O)c3c(O)cc4c(c3n(C)c2c1O)C=CC(C)(C)O4	0	0	0	0	0	0	0	0	0	0	0	0	0	0	0	0	0	0	0	0	0	0	0	0	0	0	0	0	0	0	0	0	0	0	0	0	0	0	0	0	0	0	0	0	0	0	0
2095	Berberrubine	COC1=CC=C2C=C3c4cc5c(cc4CC[NH+]3C=C2C1=O)OCO5	0	0	0	0	0	0	0	0	0	0	0	0	0	0	0	0	0	0	0	0	0	0	0	0	0	0	0	0	0	0	0	0	0	0	0	0	0	0	0	0	0	1	0	0	0	0	0
2096	Boldine	COc1cc2c(cc1O)CC1c3c(cc(O)c(OC)c3-2)CCN1C	0	0	0	0	0	0	0	0	0	0	0	0	0	0	0	0	0	0	0	0	0	0	0	0	0	0	0	0	0	0	0	0	0	0	0	0	0	0	0	0	0	0	0	0	0	0	0
2097	(R)-Boschniakine	CC1CCc2c(C=O)cncc21	0	0	0	0	0	0	0	0	0	0	0	0	0	0	0	0	0	0	0	0	0	0	0	0	0	0	0	0	0	0	0	0	0	0	0	0	0	0	0	0	0	0	0	0	0	0	0
2098	Dumetorine	CC1=CC(=O)OC(CC2CCCCN2C)C1	0	0	0	0	0	0	0	0	0	0	0	0	0	0	0	0	0	0	0	0	0	0	0	0	0	0	0	0	0	0	0	0	0	0	0	0	0	0	0	0	0	0	0	0	0	0	0
2099	Nigellicine	Cc1cc(O)c2c(C(=O)[O-])[n+]3n(c2c1)CCCC3	0	0	0	0	0	0	0	0	0	0	0	0	0	0	0	0	0	0	0	0	0	0	0	0	0	0	0	0	0	0	0	0	0	0	0	0	0	0	0	0	0	0	0	0	0	0	0
2100	Caffeine	Cn1c(=O)c2c(ncn2C)n(C)c1=O	0	0	0	0	0	0	0	0	0	0	0	0	0	0	0	0	0	0	0	0	0	0	0	0	0	0	0	0	0	0	0	0	0	0	0	0	0	0	0	0	0	0	0	0	0	0	0
2101	Anomurine	COc1ccc(CC2NCCc3c2cc(OC)c(OC)c3OC)cc1	0	0	0	0	0	0	0	0	0	0	0	0	0	0	0	0	0	0	0	0	0	0	0	0	0	0	0	0	0	0	0	0	0	0	0	0	0	0	0	0	0	0	0	0	0	0	0
2102	Dehydrocarpaine I	CC1=NC2CCCCCCCC(=O)OC3CCC(CCCCCCCC(=O)OC1CC2)NC3C	0	0	0	0	0	0	0	0	0	0	0	0	0	0	0	0	0	0	0	0	0	0	0	0	0	0	0	0	0	0	0	0	0	0	0	0	0	0	0	0	0	0	0	0	0	0	0
2103	Carpaine	CC1NC2CCCCCCCC(=O)OC3CCC(CCCCCCCC(=O)OC1CC2)NC3C	0	0	0	0	0	0	0	0	0	0	0	0	0	0	0	0	0	0	0	0	0	0	0	0	0	0	0	0	0	0	0	0	0	0	0	0	0	0	0	0	0	0	0	0	0	0	0
2104	Dehydrocarpaine II	CC1=NC2CCCCCCCC(=O)OC3CCC(CCCCCCCC(=O)OC1CC2)N=C3C	0	0	0	0	0	0	0	0	0	0	0	0	0	0	0	0	0	0	0	0	0	0	0	0	0	0	0	0	0	0	0	0	0	0	0	0	0	0	0	0	0	0	0	0	0	0	0
2105	Pseudocarpaine	CC1NC2CCCCCCCC(=O)OC3CCC(CCCCCCCC(=O)OC1CC2)NC3C	0	0	0	0	0	0	0	0	0	0	0	0	0	0	0	0	0	0	0	0	0	0	0	0	0	0	0	0	0	0	0	0	0	0	0	0	0	0	0	0	0	0	0	0	0	0	0
2106	(E)-Casimiroedine	CN(CCc1cn(C2OC(CO)C(O)C(O)C2O)cn1)C(=O)C=Cc1ccccc1	0	0	0	0	0	0	0	0	0	0	0	0	0	0	0	0	0	0	0	0	0	0	0	0	0	0	0	0	0	0	0	0	0	0	0	0	0	0	0	0	0	0	0	0	0	0	0
2107	Turanose	O=C(CO)C(OC1OC(CO)C(O)C(O)C1O)C(O)C(O)CO.OCC1OC(OC2C(O)C(CO)OC2(O)CO)C(O)C(O)C1O.OCC1OC(OC2C(O)C(O)COC2(O)CO)C(O)C(O)C1O	0	0	0	0	0	0	0	0	0	0	0	0	0	0	0	0	0	0	0	0	0	0	0	0	0	0	0	0	0	0	0	0	0	0	0	0	0	0	0	0	0	0	0	0	0	0	0
2108	Herculin	CCCC=CCCCCC=CC(O)=NCC(C)C	0	0	0	0	0	0	0	0	0	0	0	0	0	0	0	0	0	0	0	0	0	0	0	0	0	0	0	0	0	0	0	0	0	0	0	0	0	0	0	0	0	0	0	0	0	0	0
2109	(R)-Dihydromaleimide	OC1=NC(O)C=C1	0	0	0	0	0	0	0	0	0	0	0	0	0	0	0	0	0	0	0	0	0	0	0	0	0	0	0	0	0	0	0	0	0	0	0	0	0	0	0	0	0	0	0	0	0	0	0
2110	Dihydromaleimide beta-D-glucoside	O=C1C=CC(OC2OC(CO)C(O)C(O)C2O)N1	0	0	0	0	0	0	0	0	0	0	0	0	0	0	0	0	0	0	0	0	0	0	0	0	0	0	0	0	0	0	0	0	0	0	0	0	0	0	0	0	0	0	0	0	0	0	0
2111	Systemin	CSCCC(NC(=O)C(N)CCCCN)C(=O)NC(CCC(N)=O)C(=O)NC(C(=O)NC(CC(=O)O)C(=O)OC(=O)C1CCCN1C(=O)C1CCCN1C(=O)C(CC(=O)O)NC(=O)C(CCCN=C(N)N)NC(=O)C(CCCCN)NC(=O)C(CO)NC(=O)C1CCCN1C(=O)C1CCCN1C(=O)C(CCCCN)NC(=O)C(CO)NC(=O)C(CCC(N)=O)NC(=O)C(NC(=O)C(C)N)C(C)C)C(C)O	0	0	0	0	0	1	0	0	0	0	0	0	0	0	0	0	0	0	0	0	0	0	0	0	0	0	0	0	0	0	0	0	0	0	0	0	0	0	0	0	0	0	0	0	0	0	0
2112	Garciduol C	COc1cc(O)c(C(=O)c2ccccc2)c(O)c1-c1cc(O)c(O)c2c(=O)c3cccc(O)c3oc12	0	0	0	0	0	0	0	0	0	0	0	0	0	0	0	0	0	0	0	0	0	0	0	0	0	0	0	0	0	0	0	0	0	0	0	0	0	0	0	0	0	0	0	0	0	0	0
2113	(-)-Chimonanthine	CN1CCC2(C34CCN(C)C3Nc3ccccc34)c3ccccc3NC12	0	0	0	0	0	0	0	0	0	0	0	0	0	0	0	0	0	0	0	0	0	0	0	0	0	0	0	0	0	0	0	0	0	0	0	0	0	0	0	0	0	0	0	0	0	0	0
2114	Calycanthidine	CN1CCC2(C34CCN(C)C3N(C)c3ccccc34)c3ccccc3NC12	0	0	0	0	0	0	0	0	0	0	0	0	0	0	0	0	0	0	0	0	0	0	0	0	0	0	0	0	0	0	0	0	0	0	0	0	0	0	0	0	0	0	0	0	0	0	0
2115	meso-Chimonanthine	CN1CCC2(C34CCN(C)C3Nc3ccccc34)c3ccccc3NC12	0	0	0	0	0	0	0	0	0	0	0	0	0	0	0	0	0	0	0	0	0	0	0	0	0	0	0	0	0	0	0	0	0	0	0	0	0	0	0	0	0	0	0	0	0	0	0
2116	Cinchonidine	C=CC1CN2CCC1CC2C(O)c1ccnc2ccccc12	0	0	0	0	0	0	0	0	0	0	0	0	0	0	0	0	0	0	0	0	0	0	0	0	0	0	0	0	0	0	0	0	0	0	0	0	0	0	0	0	0	0	0	0	0	0	0
2117	Cinchonine	C=CC1CN2CCC1CC2C(O)c1ccnc2ccccc12	0	0	0	0	0	0	0	0	0	0	0	0	0	0	0	0	0	0	0	0	0	0	0	0	0	0	0	0	0	0	0	0	0	0	0	0	0	0	0	0	0	0	0	0	0	0	0
2118	Hydrocinchonine	CCC1CN2CCC1CC2C(O)c1ccnc2ccccc12	0	0	0	0	0	0	0	0	0	0	0	0	0	0	0	0	0	0	0	0	0	0	0	0	0	0	0	0	0	0	0	0	0	0	0	0	0	0	0	0	0	0	0	0	0	0	0
2119	6-Propyltridecane	CCCCCCCC(CCC)CCCCC	0	0	0	0	0	0	0	0	0	0	0	0	0	0	0	0	0	0	0	0	0	0	0	0	0	0	0	0	0	0	0	0	0	0	0	0	0	0	0	0	0	0	0	0	0	0	0
2120	(S)-2-Propylpiperidine	CCCC1CCCCN1	0	0	0	0	0	0	0	0	0	0	0	0	0	0	0	0	0	0	0	0	0	0	0	0	0	0	0	0	0	0	0	0	0	0	0	0	0	0	0	0	0	0	0	0	0	0	0
[truncated: 24,553 more rows]
[truncated: 546 more columns]

## Sheet: DrugBank
molname	SMILES	1	2	3	4	5	6	7	8	9	10	11	12	13	14	15	16	17	18	19	20	21	22	23	24	25	26	27	28	29	30	31	32	33	34	35	36	37	38	39	40	41	42	43	44	45	46	47	48
[truncated: 2,249 more rows]
[truncated: 545 more columns]
